# Supplementary material
Source: PubMed Central journal article supplement (PMC2792207)

# NICKEL CATALYZED CYCLOADDITIVE COUPLING OF ENYNES AND ISOCYANATES

**Brendan R. D'Souza and Janis Louie\***

*University Of Utah, 315 S 1400 E, Salt Lake City, UT 84112*

## Supporting Information

### Table of Contents

| <b>Compound</b> | <b>Page #</b> | <b>Compound</b> | <b>Page #</b> |
|-----------------|---------------|-----------------|---------------|
| <b>14</b>       | S2            | <i>E-3d</i>     | S8, S42-S44   |
| <b>1e</b>       | S3, S20-S21   | <i>Z-3d</i>     | S8, S45-S47   |
| <b>1f</b>       | S4, S22-S24   | <i>E-3e</i>     | S8, S48-S50   |
| <i>E-3a</i>     | S4, S24-S26   | <i>Z-3e</i>     | S9, S51-S53   |
| <i>Z-3a</i>     | S5, S27-S29   | <i>E-3f</i>     | S9, S54-S56   |
| <i>E-3b</i>     | S6, S30-S32   | <i>Z-3f</i>     | S10, S57-S59  |
| <i>Z-3b</i>     | S6, S33-S35   | <i>E-3g</i>     | S10, S-60-S62 |
| <i>E-3c</i>     | S7, S36-S38   | <i>Z-3g</i>     | S10, S63-S65  |
| <i>Z-3c</i>     | S7, S39-S41   | <i>E/Z-3h</i>   | S11, S66-S67  |

| <b>Compound</b> | <b>Page #</b> | <b>Compound</b> | <b>Page#</b>   |
|-----------------|---------------|-----------------|----------------|
| <i>E</i> -3i    | S11, S68-S70  | <i>E</i> -3n    | S15, S98-S100  |
| <i>Z</i> -3i    | S12, S71-S73  | <i>Z</i> -3n    | S16, S101-S103 |
| <i>E</i> -3j    | S12, S74-S76  | <i>E</i> -3o    | S16, S104-S106 |
| <i>Z</i> -3j    | S12, S77-S79  | <i>Z</i> -3o    | S16, S107-S109 |
| <i>E</i> -3k    | S13, S80-S82  | 3p              | S17, S110-S111 |
| <i>Z</i> -3k    | S13, S83-S85  | 10              | S17, S112-S114 |
| <i>E</i> -3l    | S14, S86-S88  | 11              | S17, S115-S118 |
| <i>Z</i> -3l    | S14, S89-S91  | 12              | S18, S119-S120 |
| <i>E</i> -3m    | S15, S92-S94  | 13              | S18, S121-S122 |
| <i>Z</i> -3m    | S15, S95-S97  |                 |                |

### General Experimental 1:

All reactions were carried out in the dry glove box until otherwise specified. Toluene was dried over neutral alumina under N<sub>2</sub> using a Grubbs type solvent purification system. THF was freshly distilled from Na/benzophenone. Ni(COD)<sub>2</sub> was purchased from Strem and used without further purification. Sodium hydride used was previously washed with hexanes, dried *in vacuo* prior to use. Enyne **1a-1g** prepared analogously to known literature procedures.<sup>1</sup> IPr, SIPr, IMes, and *t*Bu ligands were prepared as previously reported.<sup>2</sup> The compounds 1-bromo-2-methylbutyne was prepared from the corresponding alcohols.<sup>3</sup> Allyl bromide, 3-bromoprop-1-yne, (3-bromoprop-1-ynyl)trimethylsilane, tetraethyl 1,1,2,2-ethanetetracarboxylate, and isocyanates **2a-2j** were purchased from Sigma Aldrich Chemicals.

All isocyanates were dried over calcium hydride and distilled under freeze-pump-thaw technique. <sup>1</sup>H, <sup>13</sup>C, nOe, and HMBC nuclear magnetic resonance spectra of pure compounds were acquired at 300, 400, and 500 MHz instruments. All spectras were carried out using CDCl<sub>3</sub> and C<sub>6</sub>D<sub>6</sub> as the solvent purchased from Cambridge Isotope Labs. Inc. All spectras are referenced to a singlet of chloroform at 7.27 ppm for <sup>1</sup>H and to the center line of a triplet at 77.26 ppm for <sup>13</sup>C or 7.16 ppm for <sup>1</sup>H and 126.80 ppm for <sup>13</sup>C unless specified otherwise. The abbreviations s, d, dd, dt, dq, t, td, tq, q, qt, quint, sept, septd, septt, m, brm, brd, brt, and brs stand for singlet, doublet, doublet of doublets, doublet of triplets, doublet of quartets, triplet,

triplet of doublets, triplet of quartets, quartet, quartet of triplets, quintet, septet, septet of doublets, septet of triplets, multiplet, broad multiplet, broad doublet, broad triplets, and broad singlet, in that order. All  $^{13}\text{C}$  NMR spectra were proton decoupled. (*E*-), (*Z*-) geometry of the dieneamides was confirmed by nOe experiments (nuclear Overhauser effect). IR spectra were recorded on a Bruker Tensor 27 FT-IR spectrometer using a NaCl crystal.

Gas Chromatography were performed on an Agilent 6890 instrument with a 30 meter HP-5 column using the following conditions: initial oven temperature: 100 °C; temperature ramp rate 25 °C/min.; final temperature: 300 °C held for 7 minutes; detector temperature: 250 °C.

### Preparation of tetraethylpent-4-ene-1,1,2,2-tetracarboxylate (**14**)

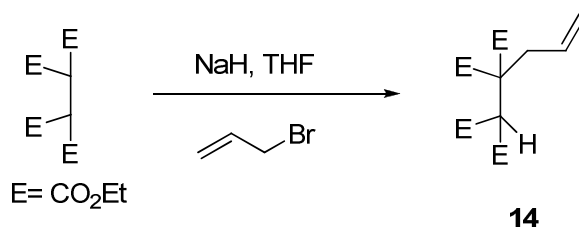

To a stirring suspension of NaH (0.415 mg, 17.277 mmol) in 150 ml THF was added tetraethyl 1,1,2,2-ethanetetracarboxylate (5.0 g, 15.707 mmol) under  $\text{N}_2$  counter-flow in two portions. The resulting solution was stirred at room temperature for 1 h after which time allyl bromide (2.1 g, 17.3 mmol) was added. A reflux condenser was attached and the mixture was stirred at reflux for 8 h at which time GC analysis showed no starting ester remained. The solution was cooled to room temperature and quenched with 100 mL of a saturated  $\text{NH}_4\text{Cl}$  solution. The layers were separated and aqueous layer was extracted with  $\text{Et}_2\text{O}$  (3 x 100 mL). The combined organics were washed with brine (100 mL), dried over anhydrous  $\text{Na}_2\text{SO}_4$ , and concentrated *in vacuo*. The resulting crude yellow oil was purified by flash column chromatography (10% EtOAc/hexanes then 12% EtOAc/hexanes) to yield **14** (5.3 g, 94%) as a pale yellow oil. The spectral data was compared with the literature values<sup>1</sup>.

**Preparation of tetraethyl 8-(trimethylsilyl)oct-1-en-7-yne-4,4,5,5-tetracarboxylate (**1f**):**

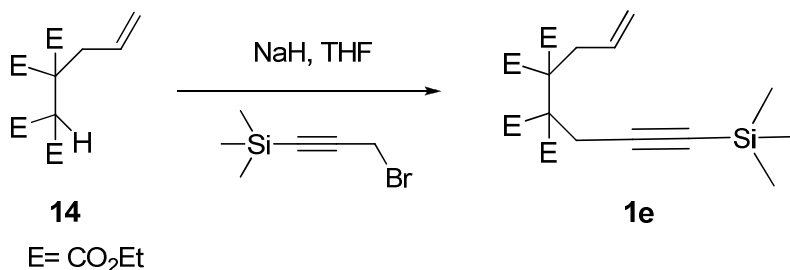

To a stirring solution of NaH (147 mg, 6.14 mmol) in 20 mL THF, tetraethyl pent-4-ene-1,1,2,2-tetracarboxylate (**14**) in 8 ml THF was added. The resulting mixture was stirred at room temperature for 1 hour. To this reaction mixture was added (3-bromoprop-1-ynyl)trimethylsilane (1.17 g, 6.14 mmol) in a single portion. The resulting solution was refluxed for 48 hrs. After checking the completion of the reaction by gas chromatography, the reaction mixture was quenched by the addition of sat.NH<sub>4</sub>Cl (10 ml) and H<sub>2</sub>O (10 ml). To the reaction mixture Et<sub>2</sub>O (20 ml) was added. The layers were separated and the aqueous layer was extracted with Et<sub>2</sub>O (3 x 20 mL). All organic layers were combined and washed with brine (10 mL), dried over Na<sub>2</sub>SO<sub>4</sub>, and concentrated *in vacuo*. The resulting crude oil was purified by flash column chromatography eluting with 10% EtOAc/hexanes to yield enyne **1f** as a yellow oil (862 mg, 65.9%). <sup>1</sup>H NMR (300 MHz, CDCl<sub>3</sub>): δ (ppm) 5.82-6.13 (m, 1H), 5.05-5.12 (m, 2H), 4.15-4.32 (m, 8H), 3.20 (s, 2H), 2.80 (d, *J* = 6.9 Hz, 2H), 1.25-1.30 (m, 12H), 0.20 (s, 9H). <sup>13</sup>C {<sup>1</sup>H} NMR (75 MHz, CDCl<sub>3</sub>): δ (ppm) 169.3, 168.8, 134.0, 119.1, 102.9, 87.1, 62.6, 62.3, 62.1, 61.8, 36.5, 23.7, 14.0, 14.1, 0.1. IR (neat): 3080, 2983, 2906, 2182, 1737, 1639, 1445, 1390, 1367, 1207, 1033, 920, 847 cm<sup>-1</sup>. HRMS calculated *m/z* for C<sub>23</sub>H<sub>36</sub>O<sub>8</sub>NaSi (M<sup>+</sup>Na) 491.2077, found 491.2071.

**Preparation of tetraethyl-oct-1-en-7-yne-4,4,5,5-tetracarboxylate (**1f**)**

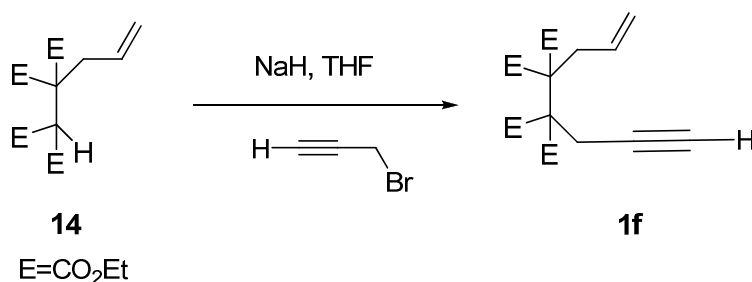

To a stirring solution of NaH (294 mg, 12.28 mmol) in 50 mL THF was added compound (**A**) (2.0 gms, 5.58 mmol). The reaction mixture was stirred for 1 hour after which 3-bromoprop-1-yne (1.46 g, 12.28 mmol) as an 80 % w/v solution in toluene in a single portion. The resulting mixture was refluxed for 24 hrs. After checking the completion of the reaction by gas

chromatography, the reaction mixture was quenched by the addition of sat NH<sub>4</sub>Cl (20 mL) and H<sub>2</sub>O (20 mL). To the reaction mixture Et<sub>2</sub>O (20 mL) was added. The layers were separated and the aqueous layer was extracted with Et<sub>2</sub>O (3 x 20 mL). All organic layers were combined and washed with brine (20 mL), dried over Na<sub>2</sub>SO<sub>4</sub>, and concentrated *in vacuo*. The resulting crude oil was purified by flash column chromatography eluting with 30% ethyl acetate/hexanes to yield enyne **1f** as a colorless solid (1.789 g, 80.95%). <sup>1</sup>H NMR (300 MHz, CDCl<sub>3</sub>): δ (ppm) 5.81-6.11 (m, 1H), 5.05-5.20 (m, 2H), 4.15-4.30 (m, 8H), 3.15 (d, *J* = 2.4 Hz, 2H), 2.81 (d, *J* = 7.2 Hz, 2H), 2.07 (t, *J* = 2.7 Hz, 1H), 1.20-1.40 (m, 12H). <sup>13</sup>C {<sup>1</sup>H} NMR (75 MHz, CDCl<sub>3</sub>): δ (ppm) 169.1, 168.8, 133.8, 119.4, 80.2, 70.8, 62.1, 62.0, 61.9, 36.4, 22.4, 14.0. IR (neat): 3277, 3080, 2984, 2906, 1736, 1639, 1445, 1390, 1367, 1209, 1035, 864 cm<sup>-1</sup>. HRMS calculated *m/z* for C<sub>20</sub>H<sub>28</sub>O<sub>8</sub>Na (M<sup>+</sup>Na) 419.1682, found 419.1684

### General Cycloaddition Procedure 1:

In the glove box, the enyne and isocyanate in toluene was added to an oven dried scintillation vial equipped with a magnetic stir bar and dissolved. To this reaction mixture, a solution of Ni(COD)<sub>2</sub> and IPr which was previously equilibrated for at least 4 hrs was added using a calibrated microsyringe. The reaction mixture was stirred at room temperature or heated in an oil-bath at the desired temperature until the reaction was complete. The consumption of starting material was monitored by GC. The mixture was concentrated *in vacuo* and purified by silica gel column chromatography.

**Compounds (Z) and (E)-tetraethyl-4-(1-(cycloamino)-1-oxopropan-2-ylidene)-5-methylenecyclohexane-1,1,2,2-tetracarboxylate (Z/E-3a):** General procedure **1** was used with enyne **1a** (100 mg, 0.24 mmol), cyclohexyl isocyanate (30.50 mg, 0.24 mmol) **2a**, Ni(COD)<sub>2</sub> (6.77 mg, 0.024 mmol), IPr (18.9 mg, 0.048 mmol) and 2.4 ml toluene and stirred for 1 hour at room temperature. The crude compound was purified by flash chromatography eluting with 30% EtOAc/hexanes to yield compound **E-3a** as a colorless solid (m.p. 130-132 °C) and compound **Z-3a** as an oil (90.3 mg, 70%).

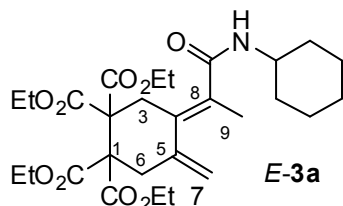

**E-3a:** <sup>1</sup>H NMR (400 MHz, CDCl<sub>3</sub>): δ (ppm) 5.82 (d, *J* = 8.8 Hz, 1H), 5.35 (s, 1H), 4.90 (s, 1H), 4.2 (m, 8H), 3.80-3.85 (brm, 1H), 3.05 (d, *J* = 6 Hz, 4H), 1.98 (s, 3H), 1.9-1.1 (brm, 10H), 1.2-1.3 (q, *J* = 5.2, 5.2 Hz, 12H). <sup>13</sup>C {<sup>1</sup>H} NMR (100 MHz, CDCl<sub>3</sub>): δ (ppm) 170.8, 169.7, 169.2, 139.7, 131.6, 130.5, 116.8, 61.9, 61.8, 60.7, 58.8, 47.8,

39.7, 35.4, 33.2, 25.7, 24.9, 17.7, 14.1, 13.9. IR (neat): 3608, 3583, 2983, 2933, 2260, 1740, 1262, 1207  $\text{cm}^{-1}$ . nOe correlation was seen with a proton on C-7 and the methyl protons on C-9. **HRMS** calculated  $m/z$  for  $\text{C}_{28}\text{H}_{41}\text{NO}_9\text{Na}$  ( $\text{M}^+\text{Na}$ ) 558.2679, found 558.2670.

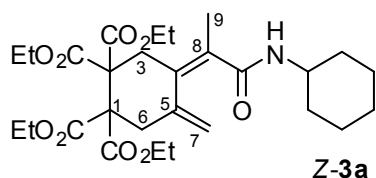

**Z-3a:**  $^1\text{H}$  NMR (400 MHz,  $\text{CDCl}_3$ ):  $\delta$  (ppm) 5.6 (m, 2H), 4.1-4.2 (m, 8H), 3.6-3.8 (s, 1H), 3.20 (s, 2H), 2.90 (s, 2H), 1.90 (s, 3H), 1.5-1.75 (m, 6H), 1.05-1.20 (m, 16H).  $^{13}\text{C}$   $\{^1\text{H}\}$  NMR (100 MHz,  $\text{CDCl}_3$ ):  $\delta$  (ppm) 171.6, 169.5, 169.4, 141.0, 133.6, 131.5, 116.6, 62.1, 61.9, 60.9, 58.8, 47.7, 39.0, 33.4, 32.5, 30.5, 29.9, 25.8,

24.9, 16.0, 14.1, 14.0. IR (neat): 3583, 3392, 2984, 2933, 2855, 2253, 1730, 1656, 1267, 912  $\text{cm}^{-1}$ . nOe correlation was seen with vinylic proton on C-7 and methylene protons on C-6. **HRMS** calculated  $m/z$  for  $\text{C}_{28}\text{H}_{41}\text{NO}_9\text{Na}$  ( $\text{M}^+\text{Na}$ ) 558.2679, found 558.2673.

**Compounds (Z) and (E)-tetraethyl 4-(1-(benzylamino)-1-oxopropan-2-ylidene)-5-methylenecyclohexane-1,1,2,2-tetracarboxylate (E/Z-3b):** General procedure **1** was used with enyne **1a** (100 mg, 0.24 mmol), benzyl isocyanate (32.44 mg, 0.24 mmol) **2b**,  $\text{Ni}(\text{COD})_2$  (6.77 mg, 0.024 mmol), IPr (18.9 mg, 0.048 mmol) and 2.4 ml toluene and stirred for 2 hours at room temperature. The crude compound was purified by flash chromatography eluting with 30% EtOAc to yield compound **E-3b** as a colorless solid (m.p. 95-98  $^\circ\text{C}$ ) and compound **Z-3b** as an oil (90mg, 68%).

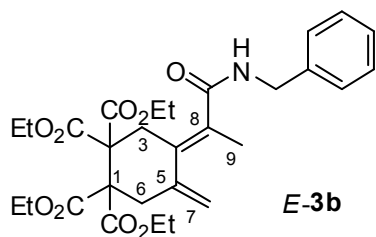

**E-3b:**  $^1\text{H}$  NMR (300 MHz,  $\text{CDCl}_3$ ):  $\delta$  (ppm) 7.20-7.40 (m, 5H), 5.92 (t,  $J = 6.3$  Hz, 1H), 5.0 (s, 1H), 4.71 (d,  $J = 1.2$  Hz, 1H), 4.34 (d,  $J = 5.7$  Hz, 2H), 4.25-4.13 (m, 8H), 3.05 (s, 2H), 2.84 (s, 2H), 1.94 (s, 3H), 1.15-1.25 (m, 12H).  $^{13}\text{C}$   $\{^1\text{H}\}$  NMR (75 MHz,  $\text{CDCl}_3$ ):  $\delta$  (ppm) 172.4, 169.4, 169.3, 140.9, 138.2, 134.2, 130.8, 128.7, 128.1, 127.5, 116.6, 62.1, 61.9, 60.8, 58.7, 43.9, 38.9, 33.5,

16.1, 14.1, 14.0. IR (neat): 3396, 2983, 1735, 1659, 1266, 1204, 864  $\text{cm}^{-1}$ . nOe correlation was seen with a proton on C-7 and the protons on C-9. **HRMS** calculated for  $m/z$   $\text{C}_{29}\text{H}_{37}\text{NO}_9\text{Na}$  ( $\text{M}^+\text{Na}$ ) 566.2366, found 566.2360.

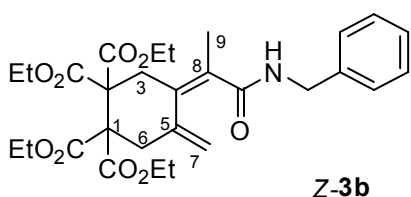

**Z-3b:**  $^1\text{H}$  NMR (300 MHz,  $\text{CDCl}_3$ ):  $\delta$  (ppm) 7.29-7.25 (brm, 5H), 6.26 (t,  $J = 5.4$  Hz, 1H), 5.12 (m, H), 4.94 (d,  $J = 1.8$  Hz, 1H), 4.54 (d,  $J = 6.3$  Hz, 2H), 3.8-4.2 (brm, 8H), 2.98 (d,  $J =$

15.9 Hz, 4H), 1.98 (s, 3H), 1.25-1.05 (m, 12 H).  $^{13}\text{C}$   $\{^1\text{H}\}$  NMR (75 MHz,  $\text{CDCl}_3$ ):  $\delta$  (ppm) 171.6, 169.7, 169.2, 139.8, 138.4, 132.3, 129.6, 128.8, 128.1, 127.6, 116.9, 61.9, 61.9, 60.8, 58.8, 43.6, 39.6, 35.7, 14.0, 13.8. IR (neat): 3396, 2983, 1735, 1659, 1266, 1204, 1041, 912  $\text{cm}^{-1}$ . nOe correlation was seen with vinylic proton on C-7 and methylene protons on C-6. **HRMS** calculated for  $m/z$   $\text{C}_{29}\text{H}_{37}\text{NO}_9\text{Na}$  ( $\text{M}^+\text{Na}$ ) 566.2366, found 566.2369.

**Compounds (Z) and (E)-tetraethyl 4-(1-(ethylamino)-1-oxopropan-2-ylidene)-5-methylenecyclohexane-1,1,2,2-tetracarboxylate (Z/E-3c):** General procedure 1 was used with enyne 1a (100 mg, 0.24 mmol), ethyl isocyanate (17.31 mg, 0.24 mmol) 2c,  $\text{Ni}(\text{COD})_2$  (6.77 mg, 0.024 mmol), IPr (18.9 mg, 0.048 mmol) and 2.4 ml toluene and stirred for 2 hours 80 °C. The crude compound was purified by flash chromatography eluting with 30% EtOAc/hexanes to yield compound **E-3c** as a colorless solid (m.p. 98-100 °C) and compound **Z-3c** as an oil (93.7 mg, 80%).

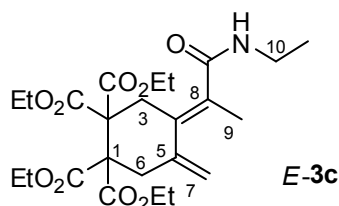

**E-3c:**  $^1\text{H}$  NMR (300 MHz,  $\text{CDCl}_3$ ):  $\delta$  (ppm) 5.59 (brs, 1H), 5.10 (s, 1H), 4.90 (s, 1H), 4.18-4.28 (m, 8H), 3.21 (q,  $J = 6.4$  Hz, 2H), 2.89 (s, 4H), 1.60 (d,  $J = 6.4$  Hz, 3H), 1.15-1.25 (m, 12H).  $^{13}\text{C}$   $\{^1\text{H}\}$  NMR (75 MHz,  $\text{CDCl}_3$ ):  $\delta$  (ppm) 171.7, 169.8, 169.3, 139.6, 131.8, 130.4, 117.0, 62.0, 60.7, 58.9, 39.6, 35.5, 34.2, 17.8, 14.9, 14.1, 13.9. IR(neat): 3609, 3584, 2982, 1738, 1647, 1367, 1263, 1209, 1042, 864  $\text{cm}^{-1}$ . nOe correlation was seen with a proton on C-7 and the methyl protons on C-9. **HRMS**  $m/z$  calculated for  $\text{C}_{24}\text{H}_{35}\text{NO}_9\text{Na}$  ( $\text{M}^+\text{Na}$ ) 504.2210, found 504.2209.

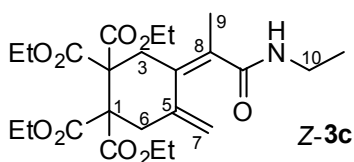

**Z-3c:**  $^1\text{H}$  NMR (400 MHz,  $\text{CDCl}_3$ ):  $\delta$  (ppm) 5.59 (t,  $J = 5.6$  Hz, 2H), 5.10 (brs, 1H), 4.90 (brs, 1H), 4.15-4.24 (m, 8H), 3.21 (q,  $J = 6.6$  Hz, 2H) 3.14 (s, 2H), 2.84 (s, 2H), 1.84 (s, 3H), 1.26 (m, 12H), 1.06 (t,  $J = 7.2, 7.2$  Hz, 3H).  $^{13}\text{C}$   $\{^1\text{H}\}$  NMR (75 MHz,  $\text{CDCl}_3$ ):  $\delta$  (ppm) 172.5, 169.5, 169.4, 141.0, 133.8, 131.2, 116.4, 61.8, 61.7, 58.5, 55.9, 31.4, 14.0, 12.9, 3.8. IR (neat): 3584, 3402, 2982, 1735, 1519, 1266, 913  $\text{cm}^{-1}$ . nOe correlation was seen with vinylic proton on C-7 and methylene protons on C-6. **HRMS**  $m/z$  calculated for  $\text{C}_{28}\text{H}_{41}\text{NO}_9\text{Na}$  ( $\text{M}^+\text{Na}$ ) 504.2210, found 504.2207.

**Compounds (Z) and (E)-tetraethyl- 4-methylene-5-(1-oxo-1-(phenylamino)propan-2-ylidene)cyclohexane-1,1,2,2-tetracarboxylate (3d):** General procedure 1 was used with enyne

**1a** (100 mg, 0.24 mmol), phenylisocyanate (29.10 mg, 0.24 mmol) **2d**, Ni(COD)<sub>2</sub> (6.77 mg, 0.024 mmol), IPr (18.9 mg, 0.048 mmol) and 2.4 ml toluene and stirred for 2 hours at 60 °C. The crude compound was purified by flash chromatography eluting with 30% EtOAc/hexanes to yield compound **E-3d** and compound **Z-3d** as oils (105.5 mg, 79%).

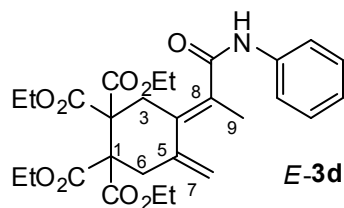

**E-3d**: <sup>1</sup>H NMR (400 MHz, CDCl<sub>3</sub>): δ (ppm). 8.105 (s, 1H), 7.5 (d, *J* = 7.6 Hz, 2H), 7.33 (t, *J* = 6 Hz, 2H), 7.13 (t, *J* = 5.4 Hz, 1H), 5.20 (s, 1H), 4.99 (s, 1H), 4.15-4.26 (m, 8H), 3.158 (s, 2H), 2.99 (m, 2H), 2.07 (s, 3H), 1.15-1.4 (m, 12H). <sup>13</sup>C {<sup>1</sup>H} NMR (100 MHz, CDCl<sub>3</sub>): δ (ppm) 169.9, 169.2, 139.5, 138.3, 132.2, 130.5, 129.2, 124.3, 119.8, 117.3, 62.2, 62.1, 60.4, 59.3, 39.8, 35.6, 18.1, 14.1, 13.9. IR (neat): 3348, 2984, 1738, 1673, 1532, 1441, 1266, 1041, 915, 732 cm<sup>-1</sup>. nOe correlation was seen with a proton on C-7 and the methyl protons on C-9. **HRMS** calculated *m/z* for C<sub>28</sub>H<sub>35</sub>NO<sub>9</sub>Na (M<sup>+</sup>Na) 552.2210, found 552.2205.

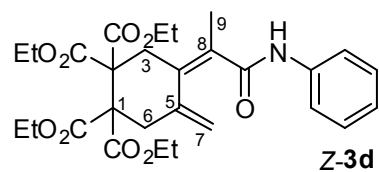

**Z-3d**: <sup>1</sup>H NMR (400 MHz, CDCl<sub>3</sub>): δ (ppm) 7.55 (s, 1H), 7.48 (d, *J* = 8 Hz, 2H), 7.31 (t, *J* = 7.6 Hz, 2H), 7.09 (t, *J* = 4.1 Hz, 1H), 5.20 (s, 1H), 4.99 (s, 1H), 4.25 (m, 8H), 3.23 (s, 2H), 2.89 (s, 2H), 1.95 (s, 3H), 1.42-1.28 (m, 12H). <sup>13</sup>C {<sup>1</sup>H} NMR (100 MHz, CDCl<sub>3</sub>): δ (ppm) 170.6, 169.5, 169.4, 141.2, 138.7, 135.3, 131.4, 129.1, 124.2, 119.8, 117.1, 62.2, 62.1, 60.9, 58.6, 38.7, 33.5, 15.9, 14.1, 14.0. IR (neat): 3365, 2984, 1739, 1681, 1598, 1440, 1267, 1043, 915 cm<sup>-1</sup>. nOe correlation was seen with vinylic proton on C-7 and methylene protons on C-6. **HRMS** calculated for *m/z* C<sub>28</sub>H<sub>35</sub>NO<sub>9</sub>Na (M<sup>+</sup>Na) 552.2210, found 558.2208.

**Compounds (Z) and (E)-tetraethyl 4-(1-(4-methoxyphenylamino)-1-oxopropan-2-ylidene)-5-methylenecyclohexane-1,1,2,2-tetracarboxylate (Z/E-3e)**. General procedure **1** was used with enyne **1a** (100 mg, 0.24 mmol), p-methoxyphenyl isocyanate (36.33 mg, 0.24 mmol) **2e**, Ni(COD)<sub>2</sub> (6.77 mg, 0.024 mmol), IPr (18.9 mg, 0.048 mmol) and 2.4 ml toluene and stirred for 2 hours at 60 °C. The crude compound was purified by flash chromatography eluting with 30% EtOAc/hexanes to yield compound **E-3e** as a colorless solid (m.p. 119-120 °C) and compound **Z-3e** as an oil (101.7 mg, 74%).

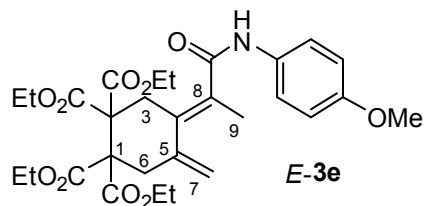

**E-3e**: <sup>1</sup>H NMR (400 MHz, CDCl<sub>3</sub>): δ (ppm) 7.96 (s, 1H), 7.48 (d, *J* = 8.8 Hz, 2H), 6.87 (d, *J* = 8.8 Hz, 2H), 5.19 (s, 1H), 4.99



(s, 1H), 4.05-4.20 (m, 8H), 3.80 (s, 3H), 3.15 (s, 2H), 2.99 (s, 2H), 2.07(s, 3H), 1.05-1.25 (m, 12H).  $^{13}\text{C}$   $\{^1\text{H}\}$  NMR (100 MHz,  $\text{CDCl}_3$ ):  $\delta$  (ppm) 169.9, 169.7, 169.2, 156.6, 139.7, 132.3, 131.4, 130.6, 121.7, 117.2, 114.4, 62.2, 62.0, 60.5, 59.4, 55.7, 39.9, 35.7, 18.0, 14.1, 13.9. IR (neat): 3351, 2984, 2253, 1739, 1513, 1248, 1038  $\text{cm}^{-1}$ . nOe correlation was seen with a proton on C-7 and the methyl protons on C-9. **HRMS** calculated for  $m/z$   $\text{C}_{29}\text{H}_{37}\text{NO}_{10}\text{Na}$  ( $\text{M}^+\text{Na}$ ) 582.2315, found 582.2314.

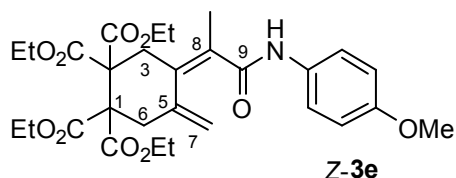

**Z-3e:**  $^1\text{H}$  NMR (400 MHz,  $\text{CDCl}_3$ ):  $\delta$  (ppm) 7.42 (s, 1H), 7.38 (d,  $J=9.2$  Hz, 2H), 6.85 (d,  $J=9.2$  Hz, 2H), 5.16 (s, 1H), 4.94 (s, 1H), 4.05-4.24 (m, 8H), 3.79 (s, 3H), 3.23 (s, 2H), 2.88 (s, 2H), 1.94 (s, 3H), 1.20-1.28 (m, 12H).  $^{13}\text{C}$   $\{^1\text{H}\}$  NMR (100 MHz,  $\text{CDCl}_3$ ):  $\delta$  (ppm) 170.5, 169.5,

169.4, 156.7, 141.3, 135.1, 131.9, 131.5, 121.7, 116.9, 114.4, 62.2, 62.1, 61.1, 58.7, 55.7, 38.8, 33.6, 29.9, 16.0, 14.1, 14.0. IR (neat): 3372, 2985, 2937, 2253, 1729, 1513, 1268, 911  $\text{cm}^{-1}$ . nOe correlation was seen with vinylic proton on C-7 and methylene protons on C-6. **HRMS** calculated for  $m/z$   $\text{C}_{29}\text{H}_{37}\text{NO}_{10}\text{Na}$  ( $\text{M}^+\text{Na}$ ) 582.2315, found 582.2313.

**Compounds (Z) and (E)-tetraethyl 4-methylene-5-(1-oxo-1-(4-(trifluoromethyl)phenylamino)propan-2-ylidene)cyclohexane-1,1,2,2-tetracarboxylate (Z/E-3f):** General procedure **1** was used with enyne **1a** (100 mg, 0.24 mmol), 4-trifluoromethylphenyl isocyanate (36.33 mg, 0.24 mmol) **2f**,  $\text{Ni}(\text{COD})_2$  (6.77 mg, 0.024 mmol), IPr (18.9 mg, 0.048 mmol) and 2.4 ml toluene and stirred for 7 hours at 100° C. The crude compound was purified by flash chromatography eluting with 30% EtOAc/hexanes to yield compound **E-3f** and compound **Z-3f** as oils (83.2 mg, 57%).

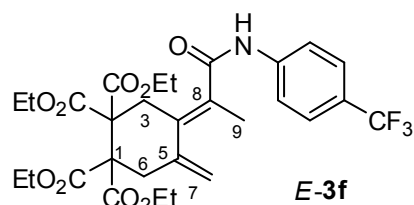

**E-3f:**  $^1\text{H}$  NMR (400 MHz,  $\text{CDCl}_3$ ):  $\delta$  (ppm) 8.52 (s, 1H), 7.72 (d,  $J=8.8$  Hz, 2H), 7.58 (d,  $J=8.8$  Hz, 2H), 5.22 (s, 1H), 5.01 (s, 1H), 4.15-4.21 (m, 8H), 3.16 (s, 2H), 2.95 (s, 2H), 2.08 (s, 3H), 1.15-1.40 (m, 12H).  $^{13}\text{C}$   $\{^1\text{H}\}$  NMR (100 MHz,  $\text{CDCl}_3$ ):  $\delta$  (ppm) 170.2, 169.9, 169.1, 141.5, 139.4, 132.8, 130.2, 126.5,

126.5, 119.4, 117.6, 62.4, 62.1, 60.3, 59.6, 39.9, 35.7, 18.1, 14.1, 13.9. IR (neat): 3339, 2985, 2940, 2257, 1737, 1684, 1368, 1262  $\text{cm}^{-1}$ . **HRMS** calculated for  $m/z$   $\text{C}_{28}\text{H}_{41}\text{NO}_9\text{Na}$  ( $\text{M}^+\text{Na}$ ) 620.2083, found 620.2079.

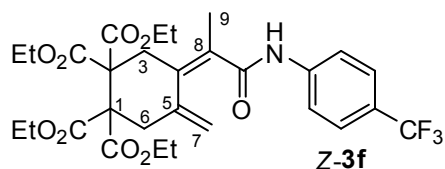

**Z-3f:**  $^1\text{H}$  NMR (400 MHz,  $\text{CDCl}_3$ ):  $\delta$  (ppm). 7.79 (s, 1H), 7.59 (m, 4H), 5.14 (s, 1H), 4.93 (s, 1H), 4.15-4.25 (m, 8H), 3.24 (s, 2H), 2.88 (s, 2H), 1.94 (s, 3H), 1.29 (m, 12H).  $^{13}\text{C}$   $\{^1\text{H}\}$  NMR (100 MHz,  $\text{CDCl}_3$ ):  $\delta$  (ppm) 170.9, 169.5, 169.3, 141.9, 141.4, 136.3, 126.4, 126.4, 119.4, 119.3, 117.4, 62.3, 62.2, 61.1, 58.6, 38.6, 33.6, 15.9, 14.1, 14.0. IR (neat): 3356, 2986, 1739, 1692, 1324, 1266, 1117, 919  $\text{cm}^{-1}$ . nOe correlation was seen with vinylic proton on C-7 and methylene protons on C-6. **HRMS** calculated for  $m/z$   $\text{C}_{28}\text{H}_{41}\text{NO}_9\text{Na}$  ( $\text{M}^+\text{Na}$ ) 620.2083, found 620.2079.

**Compounds (Z) and (E)-tetraethyl 4-methylene-5-(1-oxo-1-(4-(trifluoromethoxy)phenylamino)propan-2-ylidene)cyclohexane-1,1,2,2-tetracarboxylate (Z/E-3g).** General procedure **1** was used with enyne **1a** (100 mg, 0.24 mmol), 4-(trifluoromethoxy)phenyl isocyanate (49.48 mg, 0.24 mmol) **2g**,  $\text{Ni}(\text{COD})_2$  (6.77 mg, 0.024 mmol), IPr (18.9 mg, 0.048 mmol) and 2.4 ml toluene and stirred for 5 hours at  $80^\circ\text{C}$ . The crude compound was purified by flash chromatography eluting with 30% EtOAc/hexanes to yield compound **E-3g** and compound **Z-3g** as oils (99.8 mg, 66.7%).

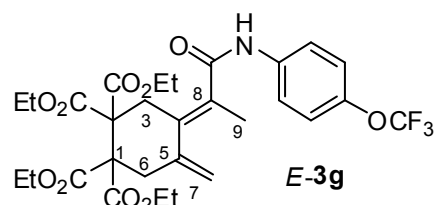

**E-3g:**  $^1\text{H}$  NMR (400 MHz,  $\text{CDCl}_3$ ):  $\delta$  (ppm) 8.36 (s, 1H), 7.61 (d,  $J=12.4$  Hz, 2H), 7.17 (d,  $J=10.8$  Hz, 2H), 5.19 (s, 1H), 4.98 (s, 1H), 4.18 (m, 8H), 3.14 (s, 2H), 2.96 (s, 2H), 2.05 (s, 3H), 1.24 (m, 12H).  $^{13}\text{C}$   $\{^1\text{H}\}$  NMR (100 MHz,  $\text{CDCl}_3$ ):  $\delta$  (ppm) 169.9, 169.1, 145.4, 139.5, 137.1, 132.7, 130.3, 126.49, 121.9, 121.0, 117.4, 62.3, 62.1, 60.3, 59.6, 39.9, 35.7, 18.0, 14.1, 13.9. IR (neat): 3339, 2985, 2874, 1738, 1265, 1203, 1058, 918  $\text{cm}^{-1}$ . **HRMS** calculated for  $m/z$   $\text{C}_{28}\text{H}_{41}\text{NO}_9\text{Na}$  ( $\text{M}^+\text{Na}$ ) 636.2033, found 636.2027.

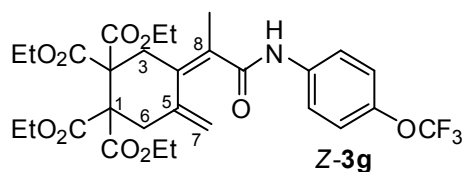

**Z-3g:**  $^1\text{H}$  NMR (400 MHz,  $\text{CDCl}_3$ ):  $\delta$  (ppm) 7.67(s, 1H), 7.51 (d,  $J=9.2$  Hz, 2H), 7.16 (d,  $J=8.4$  Hz, 2H), 5.14 (s, 1H), 4.94 (s, 1H), 4.05-4.25 (m, 8H), 3.24 (s, 2H), 2.88 (s, 2H), 1.93 (s, 3H) 1.05- 1.29 (m, 12H).  $^{13}\text{C}$   $\{^1\text{H}\}$  NMR (100 MHz,  $\text{CDCl}_3$ ):  $\delta$  (ppm) 170.8, 169.5, 169.3, 145.3, 141.4, 137.4, 135.9, 131.2, 121.9, 120.9, 117.2, 62.3, 62.1, 61.1, 58.6, 38.7, 33.5, 15.9, 14.1, 14.0. IR (neat): 3358, 2985, 2940, 2255, 1738, 1682, 1512, 1265, 1200, 1107, 1043, 919, 861  $\text{cm}^{-1}$ . nOe correlation was seen with the other vinylic proton on C-7. **HRMS** calculated for  $m/z$   $\text{C}_{28}\text{H}_{41}\text{NO}_9\text{Na}$  ( $\text{M}^+\text{Na}$ ) 636.2033, found 636.2031.

**Compounds (Z) and (E)-tetraethyl 4-methylene-5-(1-oxo-1-(o-tolylamino)propan-2-ylidene)-cyclohexane-1,1,2,2-tetracarboxylate (Z/E-3h).** General procedure 1 was used with enyne 1a (100 mg, 0.24 mmol), 2-methylphenyl isocyanate (32.43 mg, 0.24 mmol) 2h, Ni(COD)<sub>2</sub> (6.77 mg, 0.024 mmol), IPr (18.9 mg, 0.048 mmol) and 2.4 ml toluene and stirred for 1 hour at 80° C. The crude compound was purified by flash chromatography eluting with 30% EtOAc/ hexanes to yield compounds E-3h and Z-3h as an inseparable mixture of isomers as an oil (94 mg, 71%).

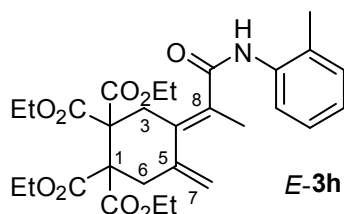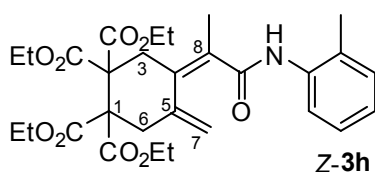

**E-3h and Z-3h:** <sup>1</sup>H NMR (400 MHz, CDCl<sub>3</sub>): δ (ppm) 7.94 (d, *J*=7.2 Hz, 2H), 7.76 (d, *J*= 7.8 Hz, 2H), 7.60 (s, 1H), 7.44 (s, 2H), 7.23-7.08 (m, 6H), 7.03 (q, *J*= 4.8, 4.8 Hz, 2H), 5.22-5.19 (m, 3H), 4.99 (d, *J*= 2.1 Hz, 1H), 4.94 (d, *J*= 1.5 Hz, 2H), 4.28-4.09 (m, 16H), 3.21 (appd, 6H), 3.02 (s, 2H), 2.88 (s, 4H), 2.27 (d, *J*= 11.4 Hz, 8H), 2.097 (s, 3H), 1.95 (s, 6H), 1.31-1.71 (m, 24H). <sup>13</sup>C {<sup>1</sup>H} NMR (100 MHz, CDCl<sub>3</sub>): δ (ppm) 170.6, 170.1, 169.7, 169.3, 169.3, 169.2, 141.1, 139.5, 136.4, 135.6, 134.7, 132.4, 131.4, 130.7, 130.5, 130.3, 130.2, 128.2, 126.8, 125.6, 124.6, 123.8, 121.1, 117.3, 62.2, 62.0, 61.9, 60.9, 60.5, 59.0, 58.5, 39.7, 38.9, 35.7, 33.4, 18.1, 17.7, 16.1, 14.0, 13.9, 13.8. IR (neat): 3386, 2983, 2939, 2906, 2248, 1726, 1682, 1517, 1268, 1200, 1096, 1057, 1044, 919, 863, 702 cm<sup>-1</sup>. HRMS *m/z* calculated for C<sub>28</sub>H<sub>41</sub>NO<sub>9</sub>Na (M<sup>+</sup>Na) 566.2366, found 566.2368.

**Compounds (Z) and (E)-tetraethyl 4-(1-(2,6-dimethylphenylamino)-1-oxopropan-2-ylidene)-5-methylenecyclohexane-1,1,2,2-tetracarboxylate (Z/E-3i).** General procedure 1 was used with enyne 1a (100 mg, 0.24 mmol), 2,6-dimethylphenyl isocyanate (35.85 mg, 0.24 mmol) 2i, Ni(COD)<sub>2</sub> (6.77 mg, 0.024 mmol), IPr (18.9 mg, 0.048 mmol) and 2.4 ml toluene and stirred for 1.5 hours at 80° C. The crude compound was purified by flash chromatography eluting with 30% EtOAc/hexanes to yield compound E-3i as a colorless solid (m.p. 138-140 °C) and compound Z-3i as oil (109 mg, 80%).

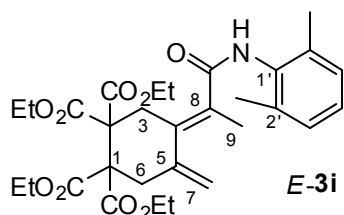

**E-3i:** <sup>1</sup>H NMR (400 MHz, CDCl<sub>3</sub>): δ (ppm) 7.33 (brs, 1H), 7.09 (brs, 3H), 5.20 (s, 1H), 4.99 (d, *J*= 1.2 Hz, 1H), 4.18-4.25 (m, 8H), 3.28 (s, 2H), 3.06 (s, 2H), 2.28 (s, 6H), 2.14 (s, 3H), 1.20-1.24 (m, 12H). <sup>13</sup>C {<sup>1</sup>H} NMR (100 MHz, CDCl<sub>3</sub>): δ (ppm) 170.4, 169.8, 169.3,

139.6, 135.8, 133.7, 132.2, 130.1, 128.5, 127.5, 117.2, 62.1, 60.8, 59.1, 39.8, 36.1, 19.0, 18.3, 14.1, 13.9. IR (neat): 3354, 2983, 2240, 1739, 1270, 1041  $\text{cm}^{-1}$ . HRMS calculated for  $m/z$   $\text{C}_{30}\text{H}_{39}\text{NO}_9\text{Na}$  ( $\text{M}^+\text{Na}$ ) 580.2523, found 580.2515.

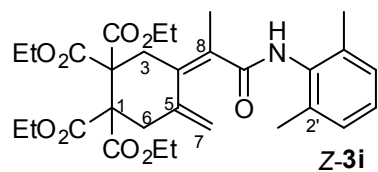

**Z-3i:**  $^1\text{H}$  NMR (400 MHz,  $\text{CDCl}_3$ ):  $\delta$  (ppm) 7.22 (s, 1H), 7.06 (brs, 3H), 5.32 (s, 1H), 5.029 (s, 1H), 4.15- 4.23 (m, 8H), 3.29 (s, 2H), 2.90 (s, 2H), 2.23 (s, 6H), 1.98 (s, 3H), 1.15-1.30 (m, 12H).  $^{13}\text{C}$   $\{^1\text{H}\}$  NMR (100 MHz,  $\text{CDCl}_3$ ):  $\delta$  (ppm) 170.8, 169.5, 169.4, 141.5, 135.8, 133.9, 133.6, 130.9, 128.6, 127.6, 117.9, 62.24, 62.0, 61.2, 58.7, 39.0, 33.6, 18.7, 16.5, 14.1, 14.0. IR (neat): 3368, 2982, 2360, 1738, 1266, 1041  $\text{cm}^{-1}$ . nOe correlation was seen between the vinylic protons on C-7. HRMS  $m/z$  calculated for  $\text{C}_{28}\text{H}_{41}\text{NO}_9\text{Na}$  ( $\text{M}^+\text{Na}$ ) 580.2523, found 580.2515.

**Compounds (Z) and (E)-tetraethyl 4-(1-(cyclohexylamino)-1-oxobutan-2-ylidene)-5-methylenecyclohexane-1,1,2,2-tetracarboxylate (Z/E-3j):** General procedure 1 was used with enyne **1b** (100 mg, 0.23 mmol), cyclohexylisocyanate (29.48 mg, 0.23 mmol) **2a**,  $\text{Ni}(\text{COD})_2$  (6.77 mg, 0.023 mmol), IPr (18.9 mg, 0.046 mmol) and 2.3 ml toluene and stirred for 4 hours at room temperature. The crude compound was purified by flash chromatography eluting with 30% EtOAc/hexanes to yield compounds **E-3j** as a colorless solid (m.p. 88-90  $^\circ\text{C}$ ) and **Z-3j** as an oil (115.9 mg, 89.5%).

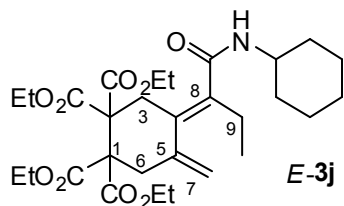

**E-3j:**  $^1\text{H}$  NMR (300 MHz,  $\text{CDCl}_3$ ):  $\delta$  (ppm) 5.81 (d,  $J= 8.7$  Hz, 1H), 5.06 (s, 1H), 4.93 (d,  $J= 1.8$  Hz, 1H), 4.20 (m, 8H), 3.80-3.91 (m, 1H), 3.0 (d,  $J= 7.2$  Hz, 4H), 2.43 (q,  $J= 7.5$  Hz, 2H), 1.90-1.95 (m, 2H), 1.6-1.8 (m, 4H), 1.58-1.05 (m, 12H), 0.99 (t,  $J= 7.2$ , 3H).  $^{13}\text{C}$   $\{^1\text{H}\}$  NMR (75 MHz,  $\text{CDCl}_3$ ):  $\delta$  (ppm) 169.8, 169.8, 169.3, 139.9, 136.8, 131.2, 116.1, 62.0, 61.9, 61.0, 58.8, 47.9, 39.8, 35.7, 33.3, 30.5, 29.8, 25.8, 25.0, 24.1, 14.1, 13.9, 13.5. IR (neat): 3385, 3068, 2982, 2253, 1727, 1641, 1268, 1206, 912  $\text{cm}^{-1}$ . nOe correlation was seen between a vinylic proton on C-7 and the protons of the ethyl group on C-8. HRMS  $m/z$  calculated for  $\text{C}_{29}\text{H}_{43}\text{NO}_9\text{Na}$  ( $\text{M}^+\text{Na}$ ) 572.2836, found 572.2831.

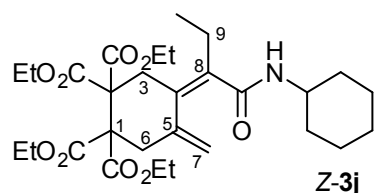

**Z-3j:**  $^1\text{H}$  NMR (300 MHz,  $\text{CDCl}_3$ ):  $\delta$  (ppm) 5.61 (d,  $J= 8.7$  Hz, 1H), 5.16 (s, 1H), 4.89 (s, 1H), 4.12-4.30 (m, 8H), 3.71-3.80 (brm, 1H), 3.19 (s, 2H), 2.80 (s, 2H), 2.27 (q,  $J= 5.7$  Hz, 2H), 1.7-

1.85 (m, 2H), 1.5-1.72 (m, 4H), 1.20-1.0 (m, 16H), 0.941 (t,  $J=7.5$  Hz, 3H).  $^{13}\text{C}$   $\{^1\text{H}\}$  NMR (75 MHz,  $\text{CDCl}_3$ ):  $\delta$  (ppm) 170.9, 169.5, 141.2, 137.8, 133.1, 116.6, 62.2, 61.9, 61.2, 58.6, 47.6, 38.8, 33.1, 32.6, 25.8, 24.9, 23.0, 14.1, 12.8. IR (neat): 3394, 3087, 2981, 2856, 2253, 1730, 1640, 1267, 913  $\text{cm}^{-1}$ . nOe correlation was seen between the vinylic protons on C-7. **HRMS**  $m/z$  calculated for  $\text{C}_{29}\text{H}_{43}\text{NO}_9\text{Na}$  ( $\text{M}^+\text{Na}$ ) 572.2836, found 572.2834

**Compounds (Z) and (E)-tetraethyl 4-methylene-5-(1-oxo-1-(phenylamino)butan-2-ylidene)cyclohexane-1,1,2,2-tetracarboxylate (Z/E-10k).** General procedure **1** was used with enyne **1b** (100 mg, 0.23 mmol), phenyl isocyanate (28.13 mg, 0.23 mmol) **2b**,  $\text{Ni}(\text{COD})_2$  (6.77 mg, 0.023 mmol), IPr (18.9 mg, 0.046 mmol) and 2.3 ml toluene and stirred for 6 hours at room temperature. The crude compound was purified by flash chromatography eluting with 30% EtOAc/hexanes to yield compound **E-3k** and compound **Z-3k** as oils (114.6 mg, 89%).

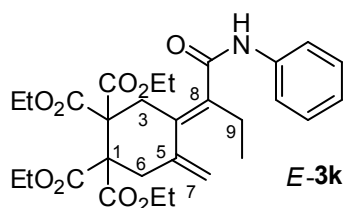

**E-3k:**  $^1\text{H}$  NMR (400 MHz,  $\text{CDCl}_3$ ):  $\delta$  (ppm) 7.98 (s, 1H), 7.58 (d,  $J=7.6$  Hz, 1H), 7.34 (t,  $J=7.6$  Hz, 2H), 7.12 (t,  $J=7.6, 7.2$  Hz, 1H), 5.13 (s, 1H), 5.01 (s, 1H), 4.15-4.24 (m, 8H), 3.13 (s, 2H), 3.02 (s, 2H), 2.54 (q,  $J=7.6$  Hz, 2H), 1.09 (s, 3H), 1.19-1.30 (m, 8H), 1.09 (t,  $J=7.6$  Hz, 3H).  $^{13}\text{C}$   $\{^1\text{H}\}$  NMR (100 MHz,  $\text{CDCl}_3$ ):  $\delta$  (ppm)

169.9, 169.2, 139.9, 138.2, 136.9, 132.0, 129.2, 124.4, 120.0, 116.4, 62.2, 62.1, 60.8, 59.4, 40.0, 36.1, 30.5, 29.9, 24.6, 14.1, 13.9, 13.7. IR (neat): 3370, 2983, 2937, 2253, 1727, 1656, 1270, 1200, 912, 733  $\text{cm}^{-1}$ . nOe correlation was seen between a vinylic proton on C-7 and the protons of the ethyl group on C-8. **HRMS**  $m/z$  calculated for  $\text{C}_{29}\text{H}_{37}\text{NO}_9\text{Na}$  ( $\text{M}^+\text{Na}$ ) 566.2366, found 566.2353.

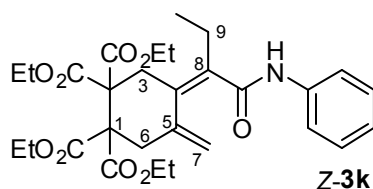

**Z-3k:**  $^1\text{H}$  NMR (300 MHz,  $\text{CDCl}_3$ ):  $\delta$  (ppm) 7.63 (s, 1H), 7.50 (d,  $J=5.4$  Hz, 2H), 7.31 (t,  $J=5.7, 5.7$  Hz, 2H), 7.09 (t,  $J=5.4, 5.4$  Hz, 1H), 5.17 (s, 1H), 4.92 (s, 1H), 4.29-4.17 (m, 8H), 3.26 (s, 2H), 2.86 (s, 2H), 2.37 (q,  $J=5.7$  Hz, 2H), 1.25-1.32 (m, 12H), 1.01 (t,  $J=5.7, 5.4$  Hz, 3H).  $^{13}\text{C}$   $\{^1\text{H}\}$  NMR (75 MHz,  $\text{CDCl}_3$ ):  $\delta$

(ppm) 170.3, 169.5, 169.4, 141.5, 138.8, 137.8, 134.9, 129.1, 124.2, 119.8, 117.2, 62.3, 62.1, 61.3, 58.6, 38.6, 33.2, 23.2, 14.1, 12.9. IR (neat): 3372, 2981, 2935, 1727, 1683, 1269, 1039  $\text{cm}^{-1}$ . nOe correlation was seen between the vinylic protons on C-7. **HRMS**  $m/z$  calculated for  $\text{C}_{29}\text{H}_{37}\text{NO}_9\text{Na}$  ( $\text{M}^+\text{Na}$ ) 566.2366, found 566.2361.

**Compounds (Z) and (E)-diethyl-3-(1-(cyclohexylamino)-1-oxopropan-2-ylidene)-4-methylenecyclopentane-1,1-dicarboxylate (Z/E-3l):** General procedure 1 was used with enyne 1c (50 mg, 0.2 mmol), cyclohexyl isocyanate (24.80 mg, 0.2 mmol) 2a, Ni(COD)<sub>2</sub> (5.5 mg, 0.02 mmol), IPr (15.5 mg, 0.04 mmol) and 2 ml toluene and stirred for 4 hours at 80 °C. The crude compound was purified by flash chromatography eluting with 30% EtOAc/hexanes to yield compounds E-3l and Z-3l as oils (48.7 mg, 65%).

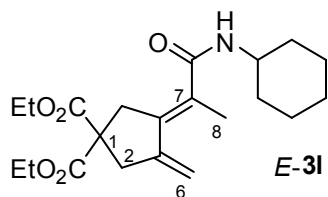

**E-3l:** <sup>1</sup>H NMR (300 MHz, CDCl<sub>3</sub>): δ (ppm) 5.86 (d, *J* = 8.1 Hz, 1H), 5.25 (d, *J* = 9.3 Hz, 2H), 4.18 (q, *J* = 7.2 Hz, 4H), 3.76-3.92 (m, 1H), 3.11 (s, 2H), 3.04 (s, 2H), 2.05 (s, 3H), 1.90-2.02 (brm, 2H), 1.56-1.8 (brm, 6H), 1.1-1.4 (m, 8H). <sup>13</sup>C {<sup>1</sup>H} NMR (75 MHz, CDCl<sub>3</sub>): δ (ppm) 171.4, 170.6, 144.7, 135.9, 129.4, 113.7, 61.9, 57.5, 48.3, 42.2, 40.3, 33.2, 30.5, 29.9, 25.7, 25.1, 17.9, 14.2. IR (neat): 3372, 2982, 2933, 2856, 2244, 1730, 1632, 1524, 1242, 971, 733 cm<sup>-1</sup>. nOe correlation was seen between a vinylic proton on C-6 and the protons of the ethyl group on C-8. **HRMS** *m/z* calculated for C<sub>21</sub>H<sub>31</sub>NO<sub>5</sub>Na (M<sup>+</sup>Na) 400.2100, found 400.2099.

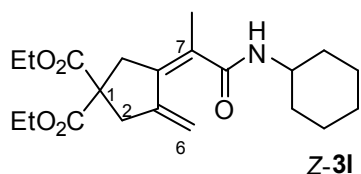

**Z-3l:** <sup>1</sup>H NMR (400 MHz, CDCl<sub>3</sub>): δ (ppm) 5.44 (d, *J* = 8.4 Hz, 1H), 5.32 (s, 1H), 5.06 (s, 1H), 4.19 (q, *J* = 7.5 Hz, 4H), 3.70-3.88 (brm, 1H), 2.97-3.02 (brs, 3H), 1.92 (s, 3H), 1.8-1.9 (m, 2H), 1.57-1.77 (brm, 6H), 1.32-1.10 (m, 8H). <sup>13</sup>C {<sup>1</sup>H} NMR (75 MHz, CDCl<sub>3</sub>): δ (ppm) 171.4, 170.7, 142.5, 134.3, 128.5, 111.0, 61.9, 57.0, 48.0, 42.4, 39.0, 32.7, 25.7, 25.0, 19.1, 14.2. IR (neat): 3375, 3285, 2981, 2931, 2855, 2361, 1733, 1625, 1247, 1190, 1159, 891, 862 cm<sup>-1</sup>. **HRMS** *m/z* calculated for C<sub>21</sub>H<sub>31</sub>NO<sub>5</sub>Na (M<sup>+</sup>Na) 400.2100, found 400.2102

**Compounds (Z) and (E)-diethyl-3-methylene-4-(1-oxo-1-(phenylamino)propan-2-ylidene)cyclopentane-1,1-dicarboxylate (Z/E-3m):** General procedure 1 was used with enyne 1c (50 mg, 0.2 mmol), phenyl isocyanate (23.66 mg, 0.2 mmol) 2b, Ni(COD)<sub>2</sub> (5.5 mg, 0.02 mmol), IPr (15.5 mg, 0.04 mmol) and 2 ml toluene and stirred for 3 hours at 80 °C. The crude compound was purified by flash chromatography eluting with 30% EtOAc/hexanes to yield compounds E-3m and Z-3m both as oils (72 mg, 72%).

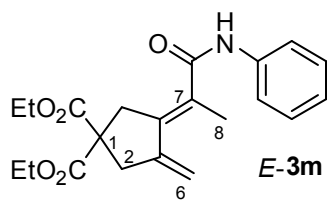

**E-3m:**  $^1\text{H}$  NMR (300MHz,  $\text{CDCl}_3$ ):  $\delta$  (ppm) 8.237 (s, 1H), 7.66 (d,  $J=8.1$  Hz, 2H), 7.35 (t,  $J=7.5$ , 8.1 Hz, 2H), 7.15 (s,  $J=7.8$ , 7.2 Hz, 1H), 5.34 (s, 2H), 4.21 (q,  $J=7.2$  Hz, 4H), 3.14 (s, 4H), 2.16 (s, 3H), 1.25 (t,  $J=6.9$  Hz, 6H).  $^{13}\text{C}$   $\{^1\text{H}\}$  NMR (75 MHz,  $\text{CDCl}_3$ ):  $\delta$  (ppm) 171.5, 169.6, 144.2, 138.4, 136.8, 129.4, 129.2, 124.4, 119.9, 114.3,

62.1, 57.4, 41.7, 40.5, 17.8, 14.2. IR (neat): 3299, 2982, 1733, 1654, 1533, 1239, 1074, 904, 861, 757  $\text{cm}^{-1}$ . nOe correlation between the vinylic proton on C-6 and the methyl protons on C-7. **HRMS**  $m/z$  calculated for  $\text{C}_{21}\text{H}_{25}\text{NO}_5\text{Na}$  ( $\text{M}^+\text{Na}$ ) 394.1630, found 394.1642.

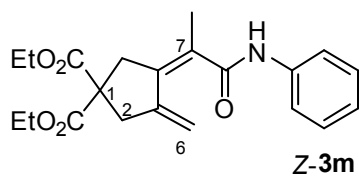

**Z-3m:**  $^1\text{H}$  NMR (300 MHz,  $\text{CDCl}_3$ ):  $\delta$  (ppm) 7.52 (d,  $J=8$  Hz, 2H), 7.34 (t,  $J=7.6$ , 8 Hz, 3H), 7.13 (t,  $J=7.2$ , 7.6 Hz, 1H), 5.30 (s, 1H), 5.12 (s, 1H), 4.23 (q,  $J=7.2$  Hz, 4H), 3.06 (s, 4H), 2.31 (s, 3H), 1.27 (t,  $J=7.2$  Hz, 6H).  $^{13}\text{C}$   $\{^1\text{H}\}$  NMR (75 MHz,  $\text{CDCl}_3$ ):  $\delta$  (ppm)

171.3, 169.4, 142.7, 138.2, 136.1, 129.3, 128.3, 124.6, 119.8, 111.9, 62.02, 56.9, 42.3, 39.2, 18.8, 14.2. IR (neat): 3306, 2980, 1731, 1665, 1255, 1194, 1096, 756  $\text{cm}^{-1}$ . nOe correlation between the vinylic protons on C-6. **HRMS**  $m/z$  calculated for  $\text{C}_{21}\text{H}_{25}\text{NO}_5\text{Na}$  ( $\text{M}^+\text{Na}$ ) 394.1630, found 394.1639.

**Compounds (Z) and (E)-N-cyclohexyl-2-(2-methylene-1H-quinolizin-3(2H, 4H, 6H, 7H, 8H, 9H, 9aH)-ylidene)butanamide (Z/E-3n):** General procedure **1** was used with enyne **1d** (100 mg, 0.52 mmol), cyclohexylisocyanate (65.47 mg, 0.52 mmol) **2b**,  $\text{Ni}(\text{COD})_2$  (14.30 mg, 0.052 mmol), IPr (40.38 mg, 0.104 mmol) and 5.2 ml toluene and stirred for 3 hours at 80  $^\circ\text{C}$ . The crude compound was purified by flash chromatography eluting with 30% EtOAc/hexanes to yield compounds **E-3n** as a colorless solid (m.p.172-175  $^\circ\text{C}$ ) and **Z-3n** as an oil (131.5 mg, 79%).

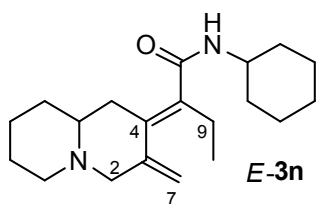

**E-3n:**  $^1\text{H}$  NMR (400 MHz,  $\text{CDCl}_3$ ):  $\delta$  (ppm) 5.76 (m, 1H), 4.98 (s, 1H), 4.79 (s, 1H), 3.85-3.92 (m, 1H), 3.40-3.52 (m, 1H), 2.80-2.85 (m, 1H), 2.57-2.60 (m, 1H), 2.30-2.50 (m, 2H), 2.20-2.25 (m, 1H), 1.93-2.10 (m, 6H), 1.52-1.740 (m, 8H), 1.15-1.43 (m, 6H), 1.01 (t,  $J=7.6$  Hz, 3H).  $^{13}\text{C}$   $\{^1\text{H}\}$  NMR (75 MHz,  $\text{CDCl}_3$ ):  $\delta$  (ppm) 169.8, 143.8,

134.6, 134.3, 111.9, 63.9, 60.6, 56.1, 48.3, 43.6, 33.4, 32.9, 25.8, 25.7, 25.2, 24.1, 23.9, 13.5. IR (neat): 3372, 2981, 2935, 1727, 1683, 1269, 1039  $\text{cm}^{-1}$ . nOe correlation between a vinylic proton on C-7 and the ethyl protons on C-8. **HRMS**  $m/z$  calculated for  $\text{C}_{20}\text{H}_{33}\text{N}_2\text{ONa}$  ( $\text{M}^+\text{Na}$ ) 317.2593, found 317.2588.

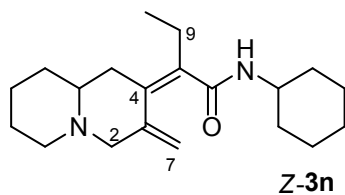

**Z-3n**

**Z-3n:**  $^1\text{H}$  NMR (300 MHz,  $\text{CDCl}_3$ ):  $\delta$  (ppm) 5.41-5.39 (m, 1H), 5.05 (s, 1H), 4.80 (s, 1H), 3.60-3.80 (m, 1H), 3.57-3.60 (m, 1H), 3.53 (s, 1H), 2.80-2.92 (m, 1H), 1.8-2.4 (m, 6H), 1.4-1.8 (m, 6H) 0.8-1.4 (m, 8H).  $^{13}\text{C}$   $\{^1\text{H}\}$  NMR (75 MHz,  $\text{CDCl}_3$ ):  $\delta$  (ppm) 170.2, 143.6, 135.7, 133.7, 113.1, 63.4, 57.6, 56.4, 47.6, 42.9, 33.3, 33.1, 25.7, 25.6, 24.8, 24.1, 23.4, 13.2. IR (neat): 3372, 2981, 2935, 1727, 1683, 1269, 1039  $\text{cm}^{-1}$ . nOe correlation between the vinylic protons on C-7. **HRMS**  $m/z$  calculated for  $\text{C}_{20}\text{H}_{33}\text{N}_2\text{ONa}$  ( $\text{M}^+\text{Na}$ ) 317.2593, found 317.2593.

**Compounds (Z) and (E)-2-(2-methylene-1H-quinolizin-3(2H,4H,6H,7H,8H,9H,9aH)-ylidene)-N-phenylbutanamide (Z/E-3o):** General procedure 1 was used with enyne **1d** (100 mg, 0.52 mmol), phenyl isocyanate (62.47 mg, 0.52 mmol) **2b**,  $\text{Ni}(\text{COD})_2$  (14.30 mg, 0.052 mmol), IPr (40.38 mg, 0.104 mmol) and 5.2 ml toluene and stirred for 3 hours at 80 °C. The crude compound was purified by flash chromatography eluting with 30% EtOAc/hexanes to yield compound **E-3o** as a colorless solid (m.p. 98-100 °C) and compound **Z-3o** as oil (115.3 mg, 71%).

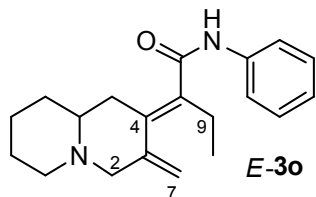

**E-3o**

**E-3o:**  $^1\text{H}$  NMR (300 MHz,  $\text{CDCl}_3$ ):  $\delta$  (ppm) 8.08 (m, 1H), 7.62 (d,  $J=5.7$  MHz, 2H), 7.20-7.35 (m, 2H), 7.12 (t,  $J=7.2$  Hz, 2H), 5.04 (s, 1H), 4.85 (s, 1H), 3.65-3.70 (m, 1H), 2.9-3.1 (brs, 1H), 2.81 (d,  $J=11.2$  Hz, 1H), 2.66 (d,  $J=12$  Hz, 1H), 2.49-2.58 (m, 2H), 2.31 (m, 1H), 2.01-2.15 (m, 3H), 1.59-1.76 (m, 4H), 1.24 -1.56 (m, 2H), 1.09 (t,  $J=7.6$  Hz, 3H).  $^{13}\text{C}$   $\{^1\text{H}\}$  NMR (75 MHz,  $\text{CDCl}_3$ ):  $\delta$  (ppm) 169.6, 144.0, 138.5, 129.6, 124.8, 120.4, 112.3, 64.4, 61.0, 56.4, 44.0, 33.3, 26.0, 24.4, 24.4, 14.0. IR (neat): 3275, 2930, 2798, 1672, 1590, 1539, 1250, 735, 690  $\text{cm}^{-1}$ . nOe correlation between a vinylic proton on C-7 and the ethyl protons on C-8. **HRMS**  $m/z$  calculated for  $\text{C}_{20}\text{H}_{27}\text{N}_2\text{O}$  ( $\text{M}^+\text{Na}$ ) 311.2123, found 311.2124.

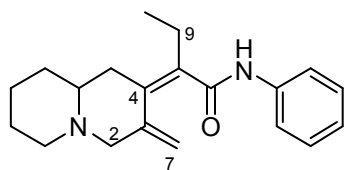

**Z-3o**

**Z-3o:**  $^1\text{H}$  NMR (300 MHz,  $\text{CDCl}_3$ ):  $\delta$  (ppm) 7.43-7.55 (m, 3H), 7.29 (d,  $J=7.2$  Hz, 2H), 7.05-7.09 (m, 1H), 5.06 (t,  $J=2$  Hz, 1H), 4.85 (m, 1H), 3.61 (d,  $J=12.4$  Hz, 1H), 2.95-3.0 (m, 1H), 2.55-2.61 (m, 1H), 1.90-2.46 (m, 4H), 1.45-1.80 (m, 4H), 1.05-1.20 (m, 6H)  $^{13}\text{C}$   $\{^1\text{H}\}$  NMR (75 MHz,  $\text{CDCl}_3$ ): 169.9, 143.8, 138.6, 135.4, 135.4, 129.1,



124.3, 119.8, 113.4, 63.3, 57.6, 56.4, 42.7, 33.1, 25.7, 24.1, 23.5, 13.4. IR (neat): 3285, 2935, 2798, 1662, 1598, 1539, 1247, 907, 732, 693  $\text{cm}^{-1}$ . nOe correlation between the vinylic protons on C-7. HRMS  $m/z$  calculated for  $\text{C}_{20}\text{H}_{27}\text{N}_2\text{O}$  ( $\text{M}^+\text{Na}$ ) 311.2123, found 311.2122.

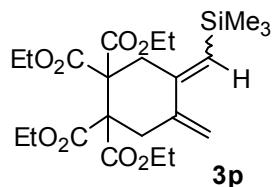

**Preparation of (E)-tetraethyl-2-butyryl-4-methylene-5-(trimethylsilyl)methylene)cyclohexane-1,1,2-tricarboxylate (3p):**

General procedure 1 was used with by stirring enyne **1e** (50 mg, 0.11 mmol) and cyclohexyl isocyanate **2a** (13.35 mg, 0.11 mmol),  $\text{Ni}(\text{COD})_2$  (3.03 mg, 0.011 mmol), IPr (8.54 mg, 0.022 mmol) for 24 hours at 100  $^\circ\text{C}$ . The crude compound was purified by column chromatography eluting with 30% EtOAc/hexanes to yield compound **3p** as an oil (13.8 mg, overall yield= 31%).  $^1\text{H}$  NMR (300 MHz,  $\text{CDCl}_3$ )  $\delta$  (ppm) 8.24 (s, 1H), 5.94 (s, 1H), 5.12 (s, 1H), 5.03 (s, 1H), 4.18 (m, 8H), 2.16 (s, 3H), 1.73 (s, 2H), 1.21-1.29 (m, 12H), 0.03 (s, 9H).  $^{13}\text{C}$   $\{^1\text{H}\}$  NMR (75 MHz,  $\text{CDCl}_3$ ):  $\delta$  (ppm). 169.3, 139.0, 136.8, 120.7, 113.6, 62.0, 61.9, 60.3, 36.3, 29.9, 22.5, 14.0, -0.9 ppm. HRMS  $m/z$  calculated for  $\text{C}_{23}\text{H}_{36}\text{O}_8\text{NaSi}$  ( $\text{M}^+\text{Na}$ ) 491.2077, found 491.2071.

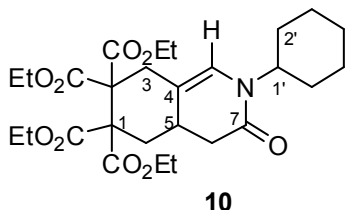

**Preparation of tetraethyl-2-cyclohexyl-3-oxo-3,4,4a,5-tetrahydroisoquinoline-6,6,7,7(2H,8H)-tetracarboxylate (10).**

General procedure 1 was used with enyne **1f** and cyclohexyl isocyanate (31.59 mg, 0.25 mmol) **2a**,  $\text{Ni}(\text{COD})_2$ , IPr and toluene stirring for 4 hours at 80  $^\circ\text{C}$ . The crude compound was purified by flash chromatography eluting with 30% EtOAc/hexanes to yield compound **10** as an oil (9.5 mg, 15%).  $^1\text{H}$  NMR (300 MHz,  $\text{CDCl}_3$ )  $\delta$  (ppm) 5.89 (s, 1H), 4.0-4.3 (m, 8H), 3.4-3.6 (m, 1H), 2.8-3.0 (m, 2H), 2.5-2.6 (m, 4H), 1.8-2.0 (m, 2H), 1.5-1.8, 1.0-1.2 (m, 6H), 1.2-1.4 (m, 14H).  $^{13}\text{C}$   $\{^1\text{H}\}$  NMR (75 MHz,  $\text{CDCl}_3$ ):  $\delta$  (ppm) 170.6, 170.4, 168.9, 167.6, 120.4, 114.6, 62.3, 62.1, 61.9, 61.7, 59.3, 51.5, 49.3, 38.8, 36.2, 34.2, 33.8, 31.7, 30.8, 29.9, 28.8, 25.9, 25.8, 25.1, 14.2, 14.1, 14.0 ppm. nOe correlation between the vinylic protons on C-10 with a) protons on the cyclohexyl ring, and b) protons on C-6. HRMS calculated for  $\text{C}_{27}\text{H}_{33}\text{NO}_9\text{Na}$  ( $\text{M}^+\text{Na}$ ) 538.2053, found 538.2061.

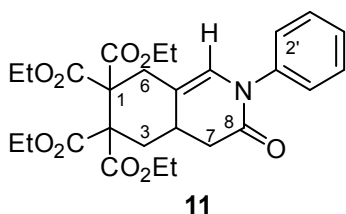

**Preparation of tetraethyl-3-oxo-2-phenyl-3,4,4a,5-tetrahydroisoquinoline-6,6,7,7(2H,8H)-tetracarboxylate (11):**

General procedure 1 was used with enyne **1f** (100 mg, 0.25 mmol), phenyl isocyanate (30.14 mg, 0.25 mmol),  $\text{Ni}(\text{COD})_2$  (6.87 mg, 0.025 mmol), IPr (19.41 mg, 0.050 mmol) and toluene 2.5 ml were stirred

for 4 hours at 80 °C. The crude compound was purified by flash chromatography eluting with 30% EtOAc/hexanes to yield compound **11** as an oil (25.4 mg, 19%). <sup>1</sup>H NMR (300 MHz, CDCl<sub>3</sub>) δ (ppm) 7.39 (t, *J*= 2H), 7.23-7.29 (m, 3H), 6.09 (s, 1H), 4.17-4.32 (m, 8H), 2.76-2.93 (m, 4H), 2.61-2.50 (m, 2H), 2.26-2.30 (m, 1H), 1.185-1.382 (m, 12H). <sup>13</sup>C {<sup>1</sup>H} NMR (75 MHz, CDCl<sub>3</sub>): δ (ppm) 171.6, 169.7, 144.2, 138.4, 136.8, 129.5, 129.2, 124.4, 119.9, 114.3, 62.1, 57.5, 41.748, 40.572, 17.838, 14.216. nOe correlation between the vinylic proton on C-10 and a) phenyl protons and b) protons on C-6. HMBC correlation between the vinylic proton on C-10 and a) C-8, b) 6, and c) C-1'. **HRMS** *m/z* calculated for C<sub>28</sub>H<sub>41</sub>NO<sub>9</sub>Na (M<sup>+</sup>Na) 544.2523, found 544.2514

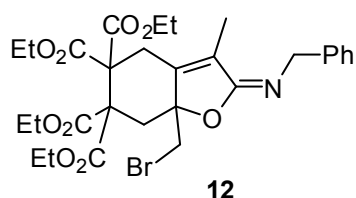

**(E)-tetraethyl 2-(benzylimino)-7a-(bromomethyl)-3-methyl-7,7a-dihydrobenzofuran-5,5,6,6(2H,4H)-tetracarboxylate (12)**  
Compound **12** were prepared as described by Wang and co-workers<sup>5</sup>. Under nitrogen atmosphere dienamide **Z-3b** (83 mgms, 0.15 mmol), *N*-bromosuccinimide (27.17 mgms, 0.15 mmol) and

1.5 ml tetrahydrofuran were stirred at room temperature for 3 hours. The reaction mixture was quenched with deionized water and extracted twice with dichloromethane (10 ml x 2 times). After drying the organic layer with MgSO<sub>4</sub>, the crude product was isolated and purified by flash chromatography (30% ethyl acetate/ hexanes) to obtain compound **12** (50 mg, 53%) as an oil. <sup>1</sup>H NMR (400 MHz, C<sub>6</sub>D<sub>6</sub>) δ (ppm). 7.58-7.59 (brs, 2H), 7.21 (t, *J*= 8.0, 2H), 7.11 (d, *J*= 7.2 Hz, 1H), 4.82 (dd, *J*= 24.4, 15.0 Hz, 2H), 3.80-4.11 (m, 8H), 3.1-3.6 (brm, 6H), 1.79 (s, 3H), 0.86-1.1 (m, 12H) <sup>13</sup>C {<sup>1</sup>H} NMR (75 MHz, C<sub>6</sub>D<sub>6</sub>): δ (ppm) 170.3, 169.4, 162.2, 145.9, 142.2, 131.1, 128.9, 128.8, 127.9, 127.0, 85.6, 26.8, 62.6, 62.4, 61.5, 60.1, 52.0, 39.2, 30.6, 29.9, 29.2, 29.2, 14.1, 9.9. **HRMS** *m/z* calculated for C<sub>29</sub>H<sub>37</sub>NO<sub>9</sub>Br (M<sup>+</sup>H) 622.50, found 622.1652.

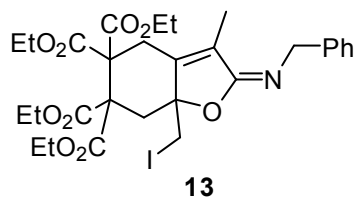

**(E)-tetraethyl-2-(benzylimino)-7a-(iodomethyl)-3-methyl-7,7a-dihydrobenzofuran-5,5,6,6(2H,4H)-tetracarboxylate (13):**  
Compound **13** was prepared as described by Wang and co-workers<sup>5</sup>. Under nitrogen atmosphere compound **Z-3b** (30 mgms, 0.06 mmol) and iodine (16.8 mgms, 0.07 mmol) and

dichloromethane 0.6 ml were stirred at room temperature for 8 hours. The reaction was quenched with 1 ml deionized water and extracted with dichloromethane (5 ml x 2). The organic layers were dried over MgSO<sub>4</sub>. The crude product was isolated and purified using flash chromatography with 30% ethyl acetate/ hexanes to yield compound **13** (33.6 mg, 90%) as an oil. <sup>1</sup>H NMR (400 MHz, C<sub>6</sub>D<sub>6</sub>) δ (ppm) 7.58-7.59 (brs, 2H), 7.21 (t, *J*= 8.0, 2H), 7.11 (d, *J*= 7.2 Hz, 1H), 4.82 (dd, *J*= 24.4, 15.0 Hz, 2H), 3.80-4.11 (m, 8H), 3.1-3.6 (brm, 6H), 1.79 (s, 3H), 0.86-1.1 (m, 12H). <sup>13</sup>C {<sup>13</sup>H} NMR (75 MHz, CDCl<sub>3</sub>): 170.3, 169.4, 162.2,

145.9, 142.2, 131.1, 128.9, 128.8, 127.9, 127.0, 85.6, 62.8, 62.6, 62.3, 61.5, 60.1, 52.0, 39.2, 30.6, 30.3, 30.3, 29.9, 29.2, 14.1, 9.9. **HRMS** calculated for C<sub>29</sub>H<sub>37</sub>NO<sub>9</sub>I (M<sup>+</sup>H) 670.14, found 670.1497.

References:

1. Tekavac, T.; Louie, J. *J. Org. Chem.* **2008**, *73*, 2641.
2. (a) Böhm, V. P. W., Gstöttmayr, C. W. K., Weskamp, T.; Herrmann, W. A. *Angew. Chem. Int. Ed.* **2001**, *40*, 3387. (b) Arduengo, A. J. III; Krafczyk, R.; Schmutzler, R.; Craig, H. A.; Goerlich, J. R.; Marshall, W. J. Unverzagt, M. *Tetrahedron* **1999**, *55*, 14523. (c) Böhm, V. P. W.; Weskamp, T.; Gstöttmayr, W. K.; Herrmann, W. A. *Angew. Chem. Int. Ed.* **2000**, *39*, 1602.
3. Jensen, D. R.; Sigman, M. S. *Org. Lett.* **2003**, *5*, 63.
4. Marson, C. M.; Grabowska, U. *J. Org. Chem.* **1994**, *59*, 284.
5. Wang, C.; Lu, J.; Mao, G.; Xi, Z. *J. Org. Chem.* **2005**, *70*, 5150.

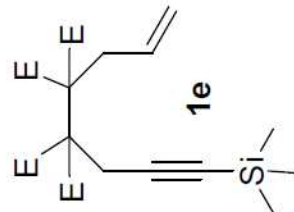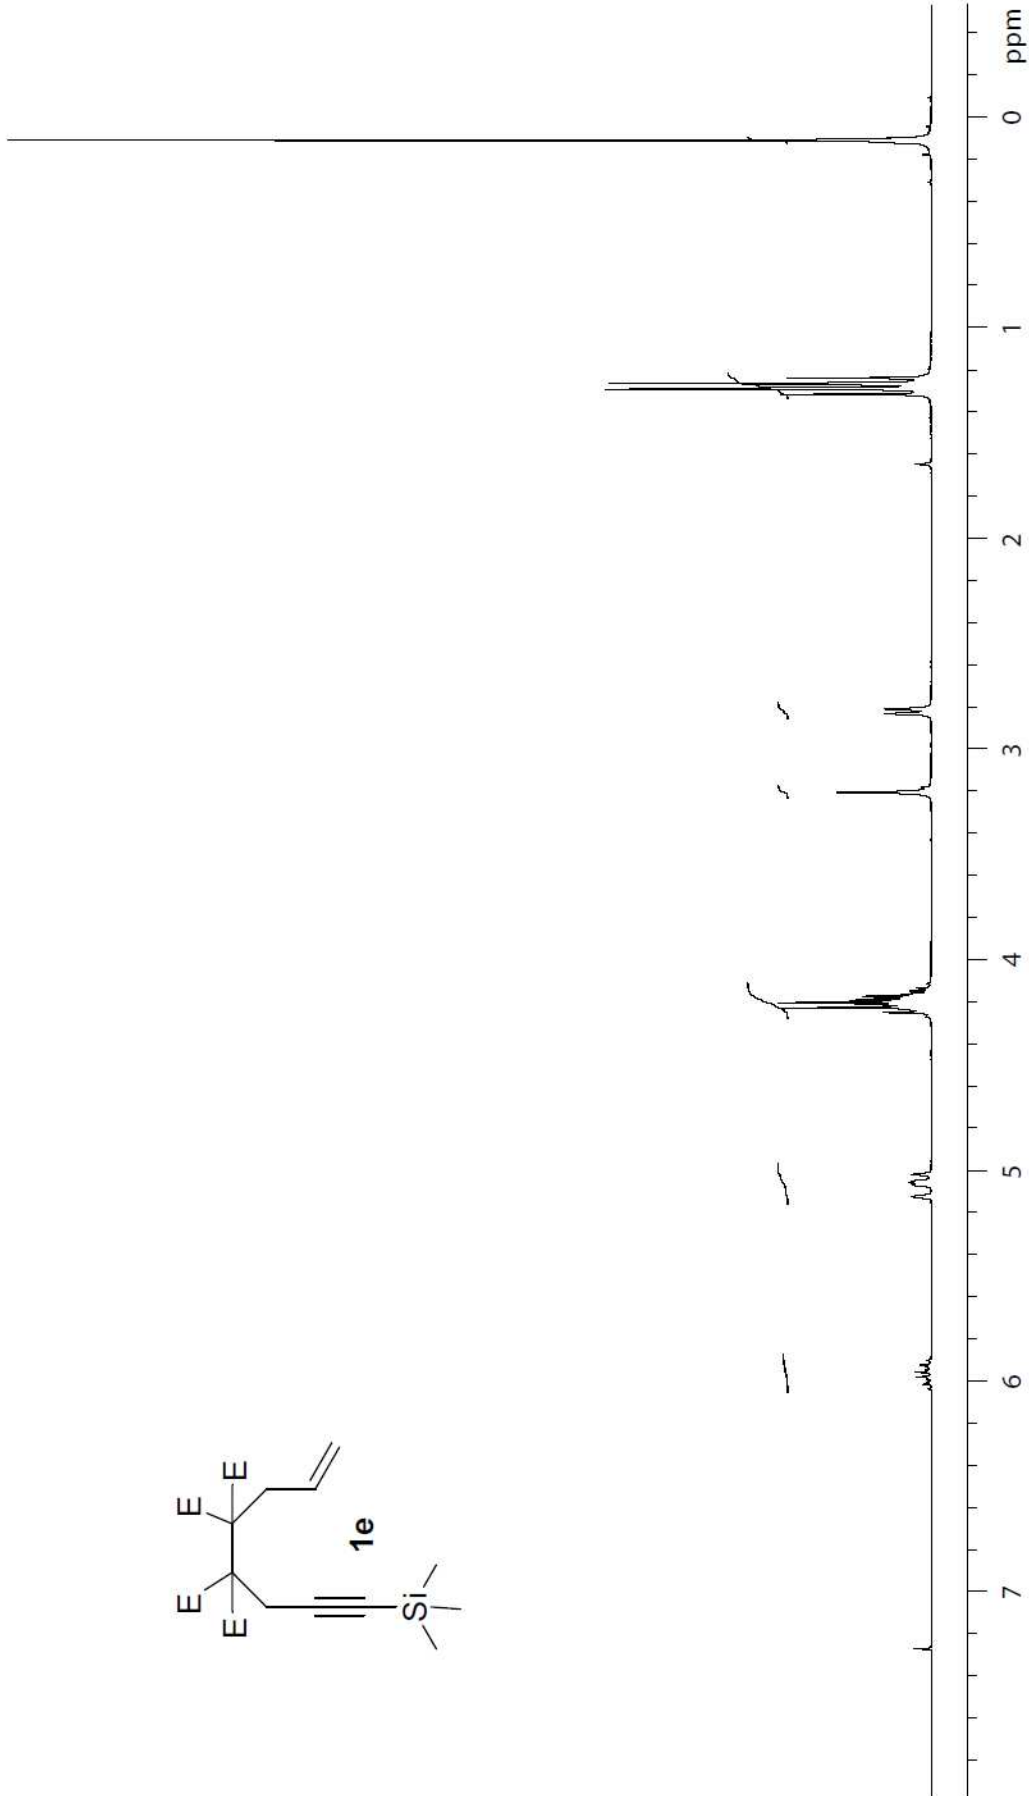

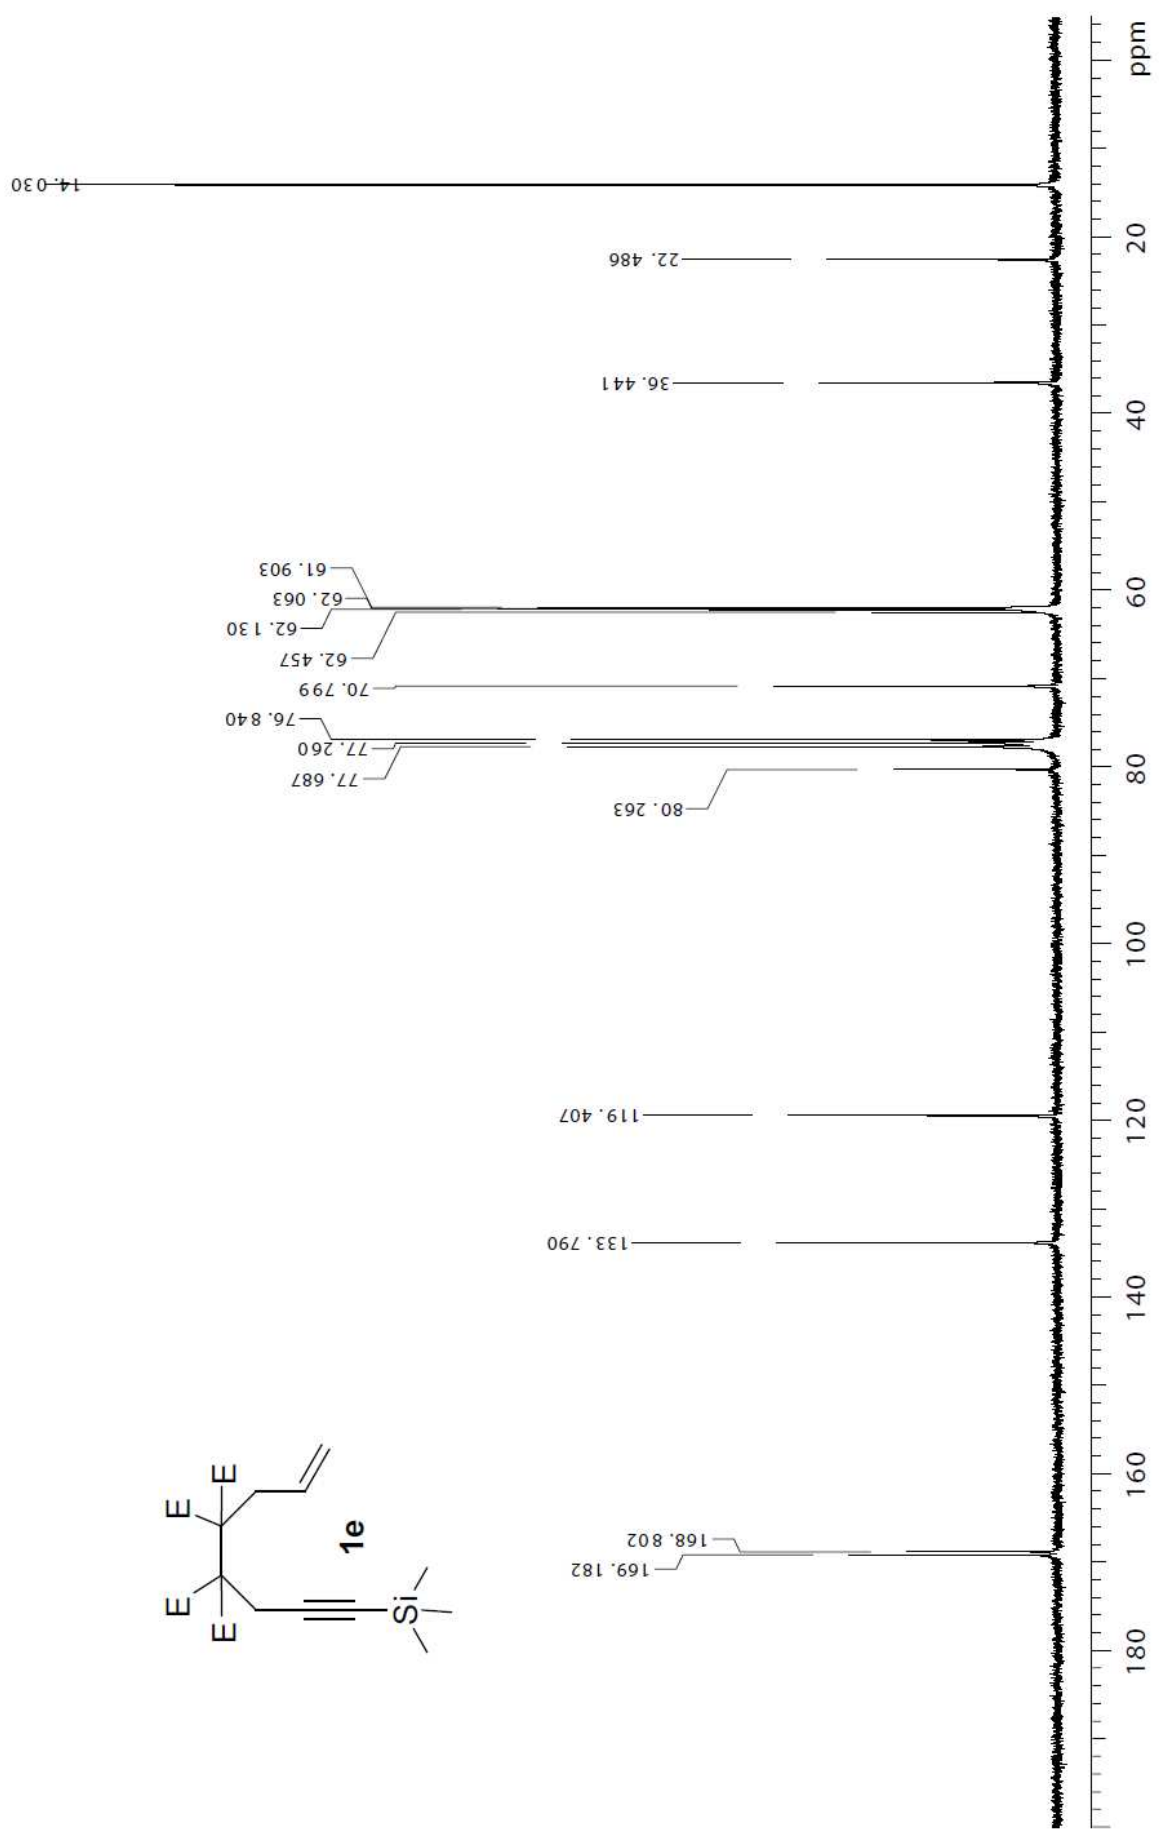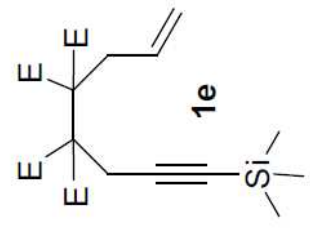

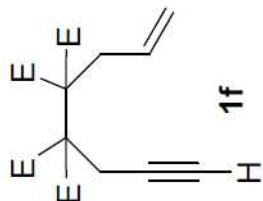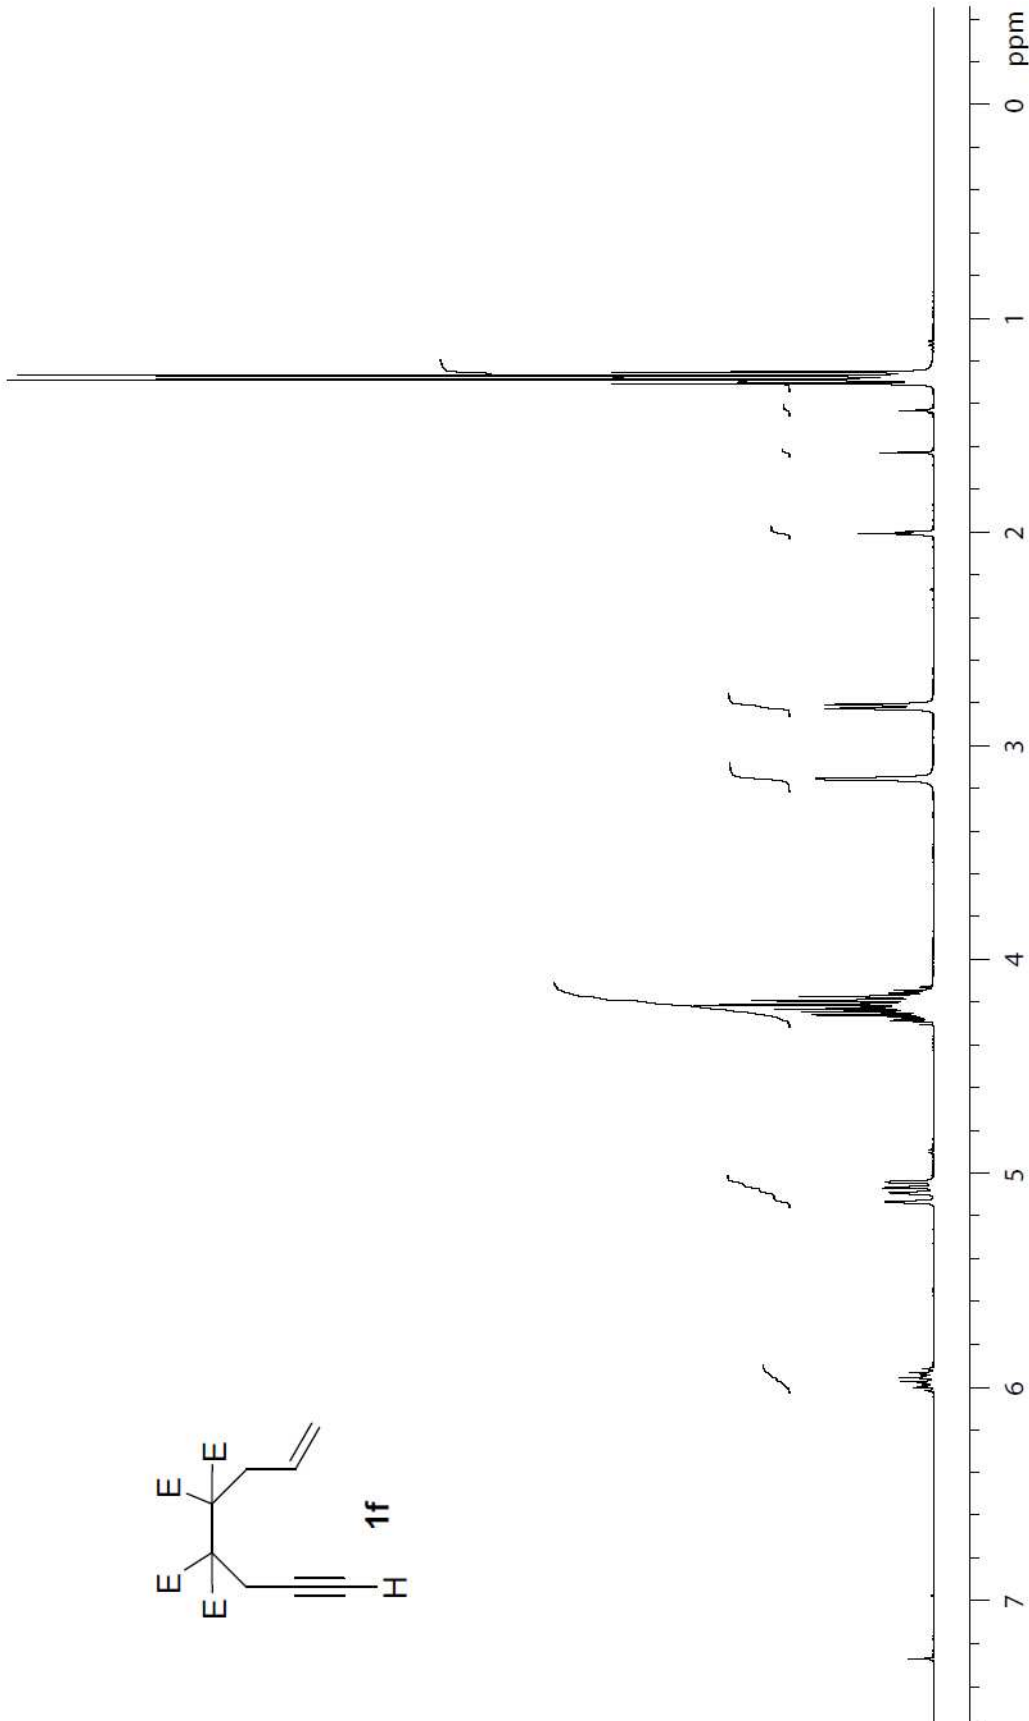

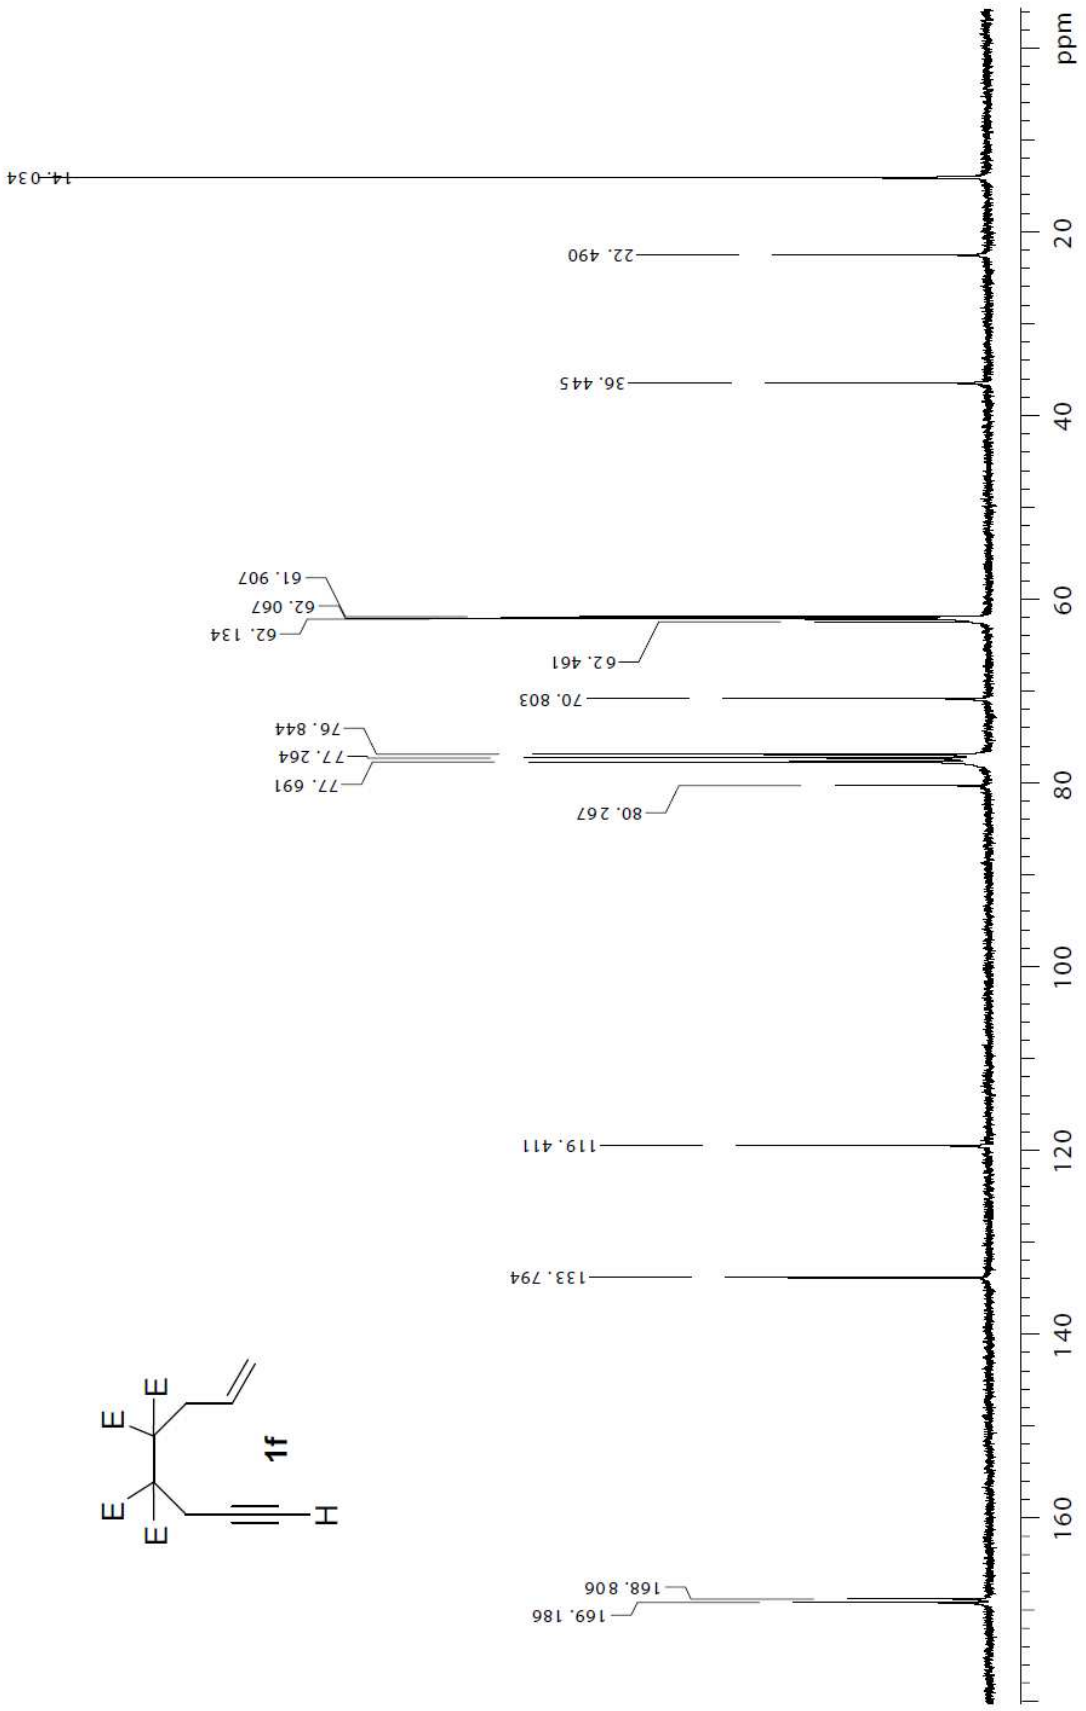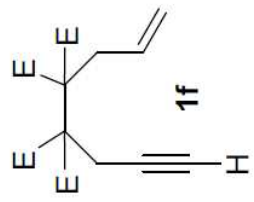

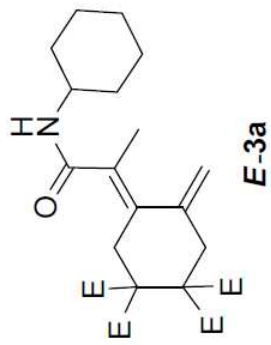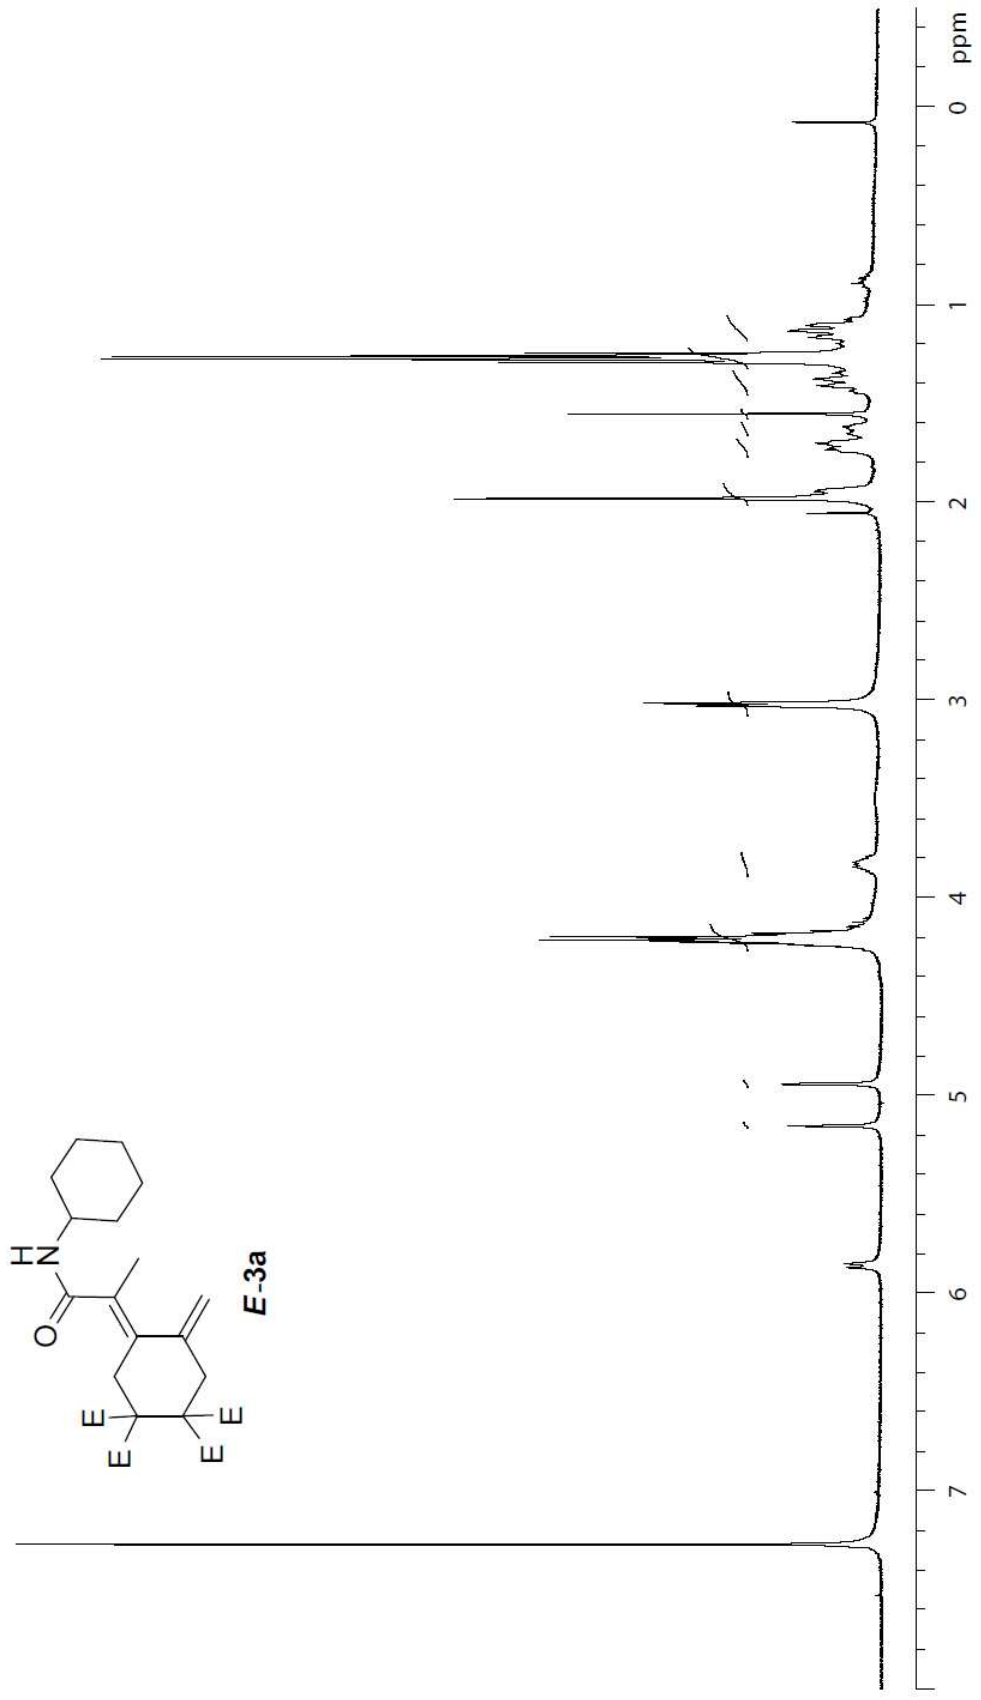



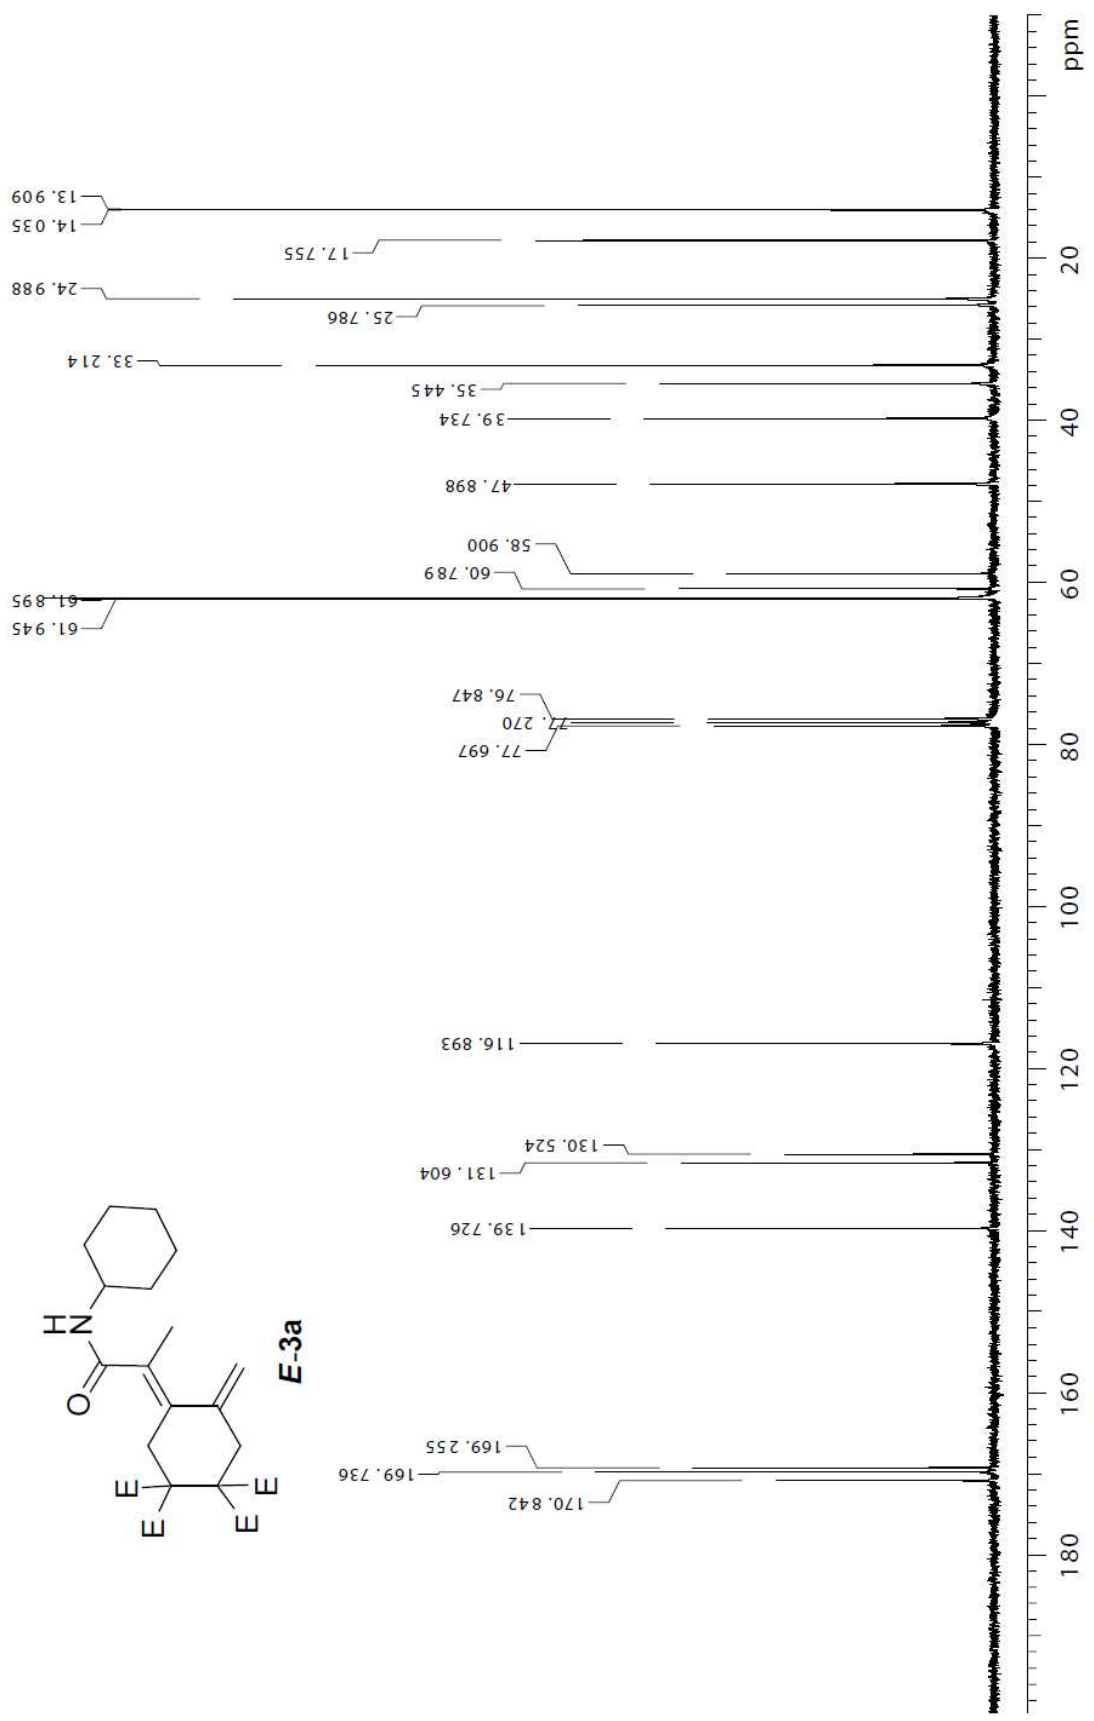

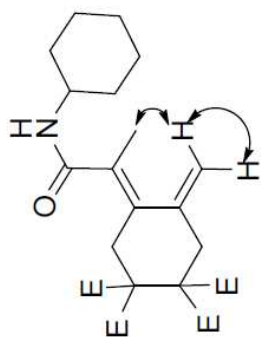

**E-3a**

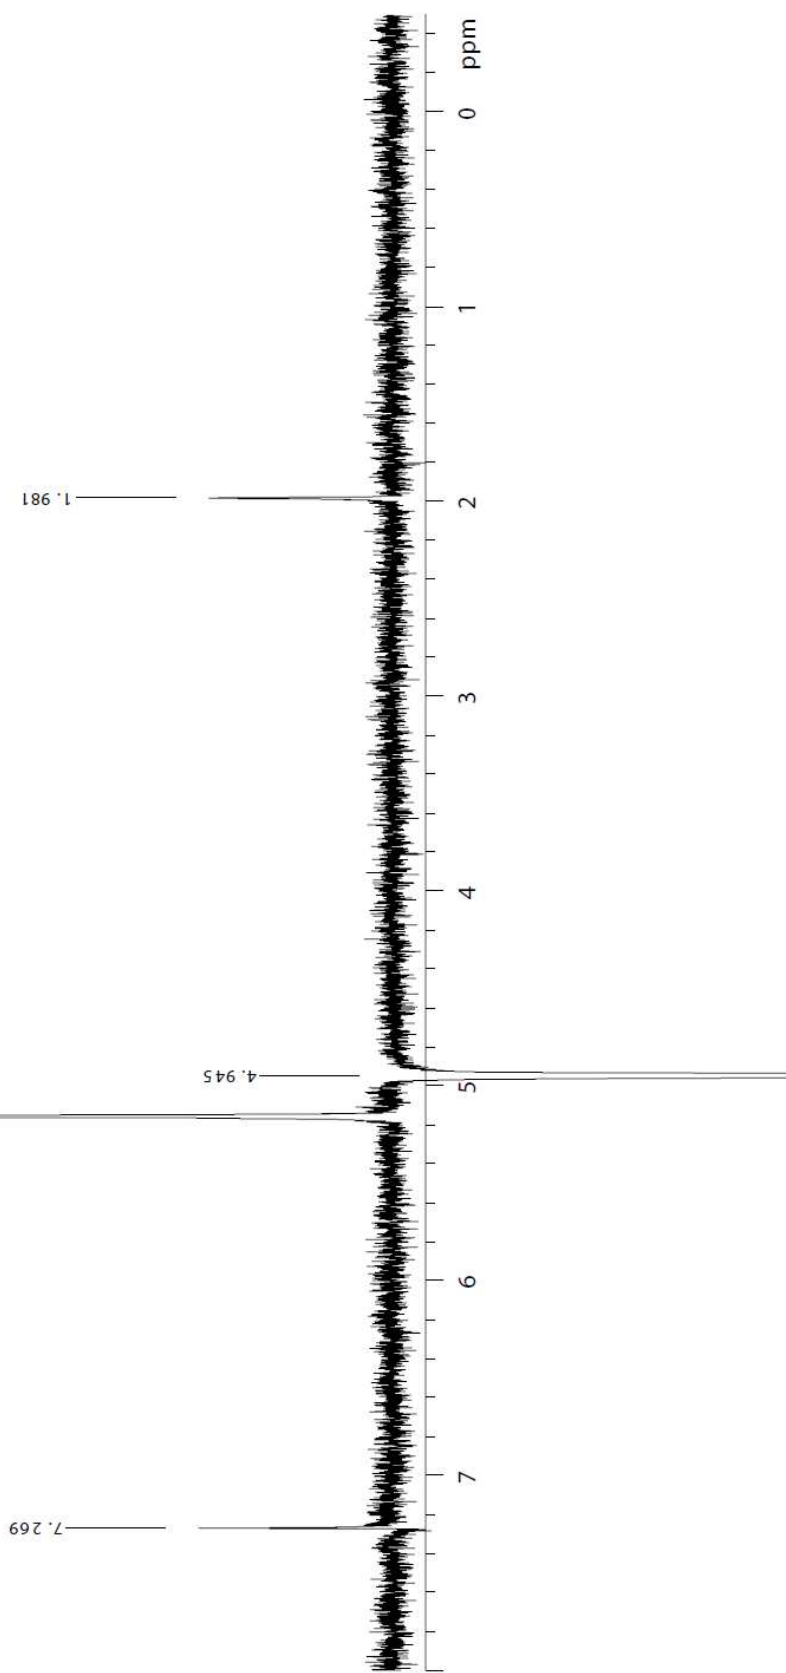

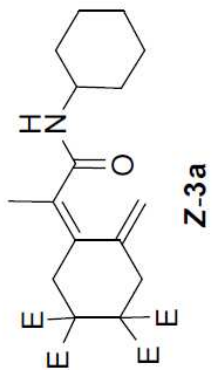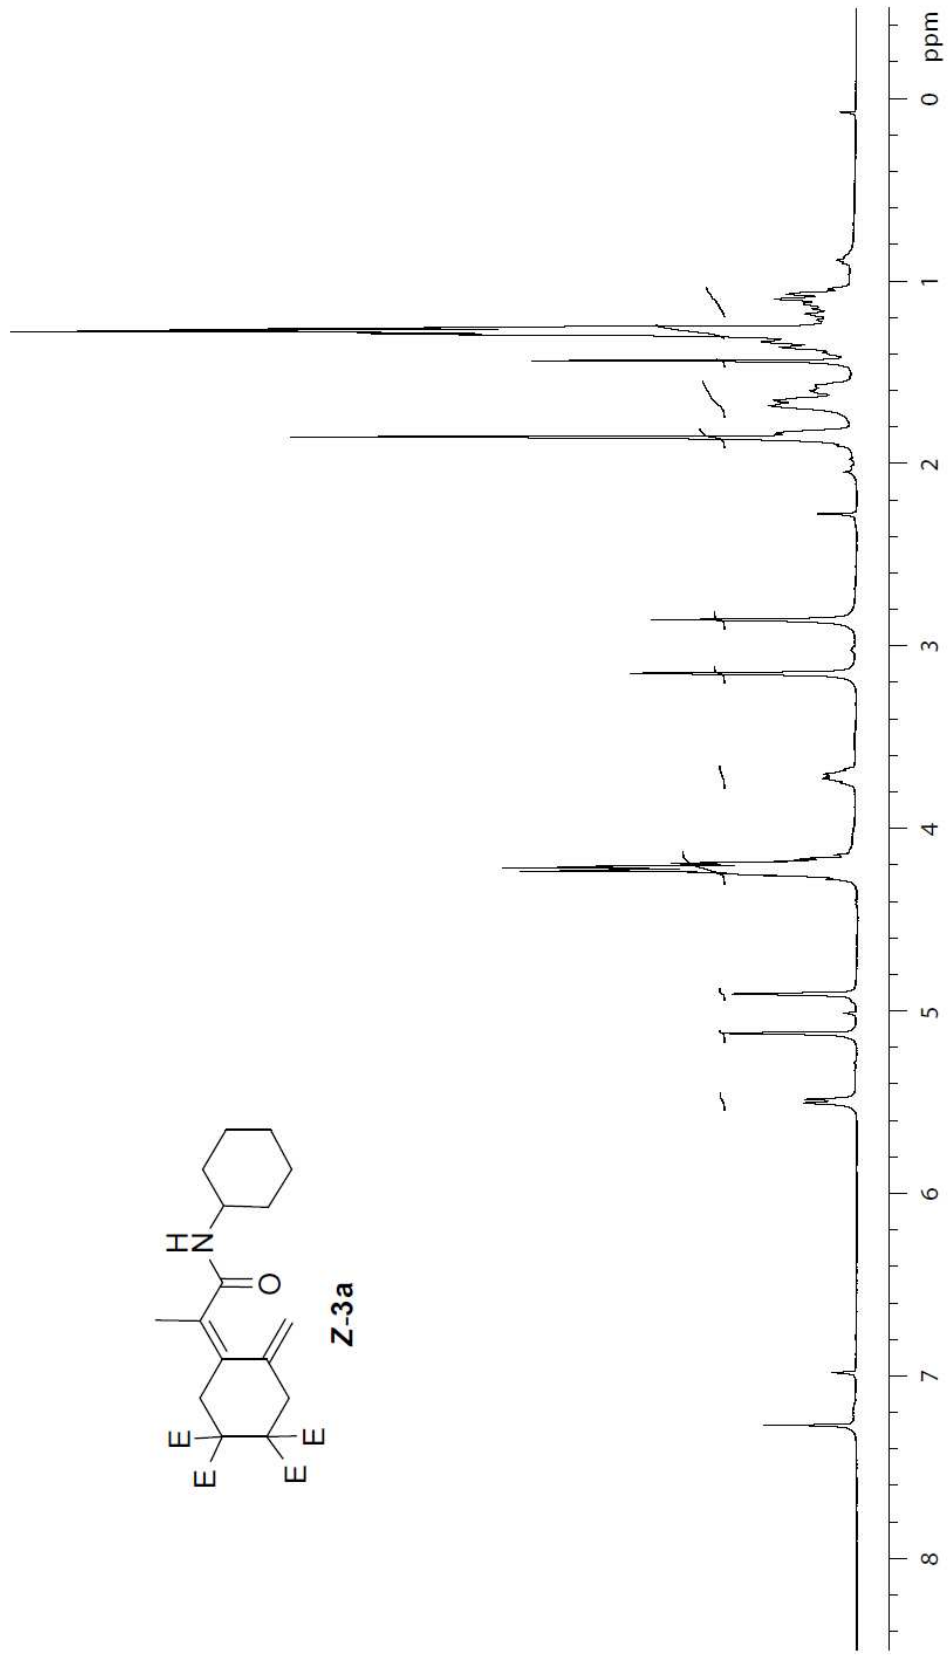

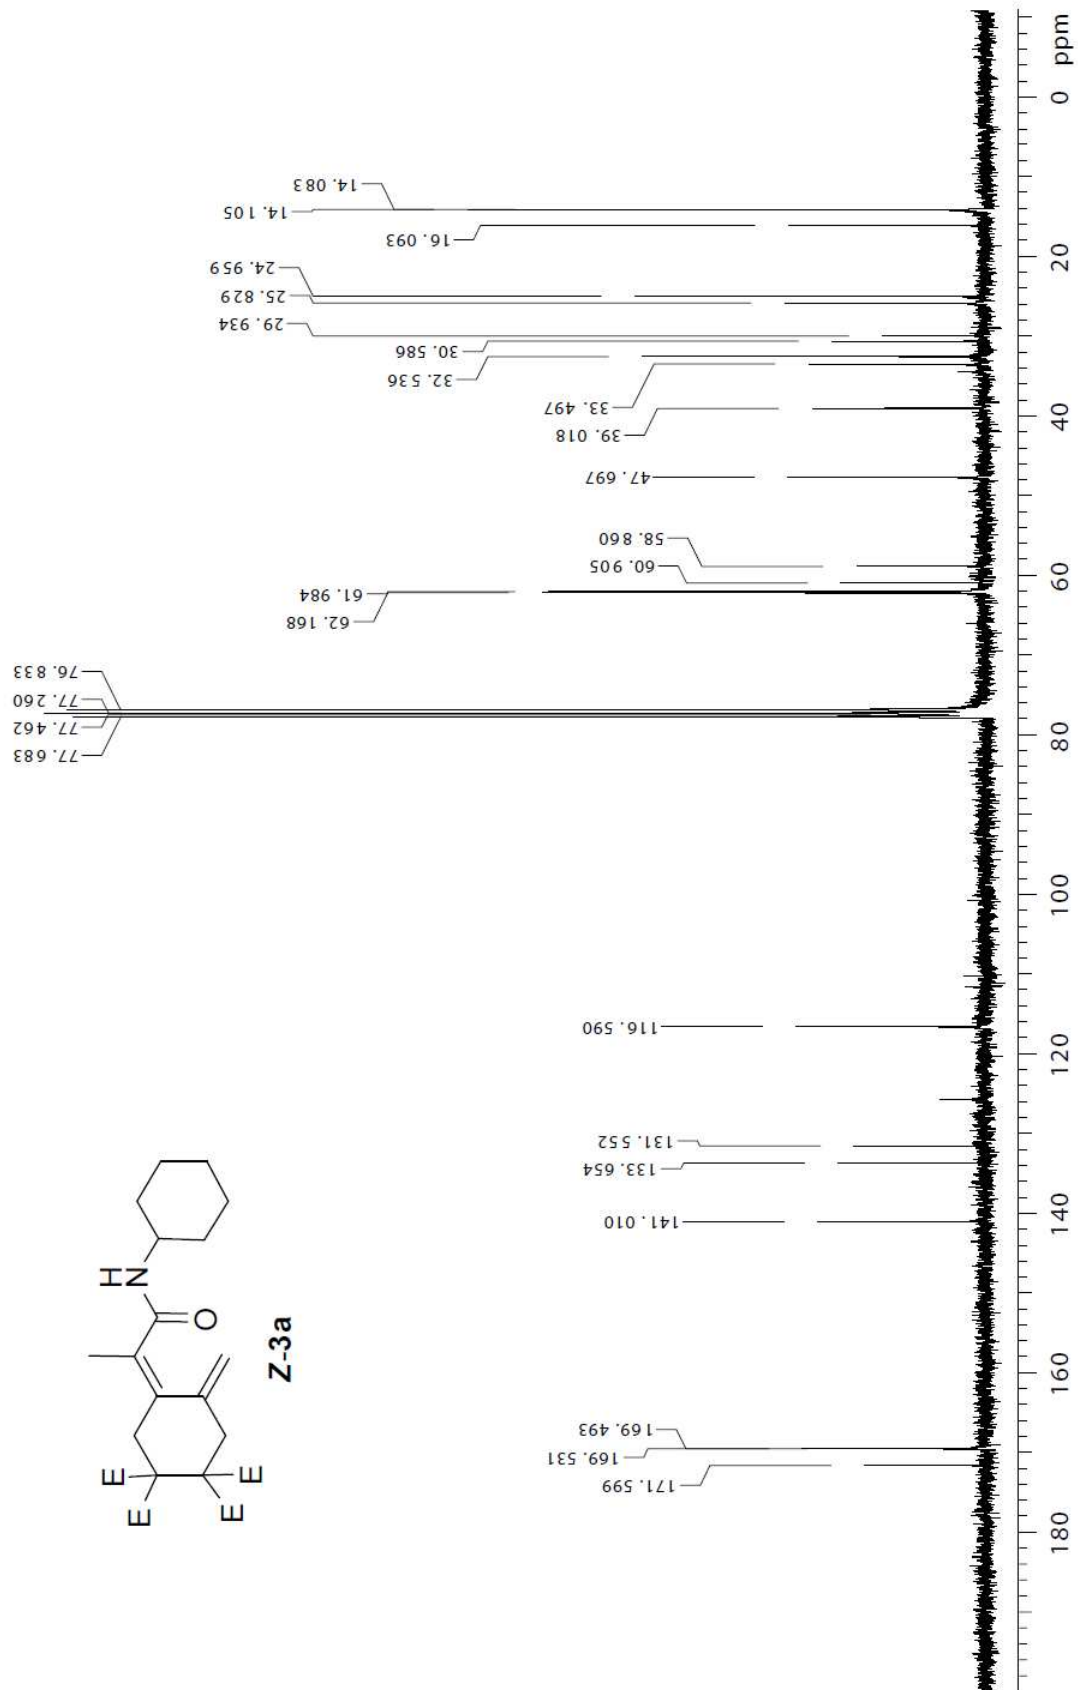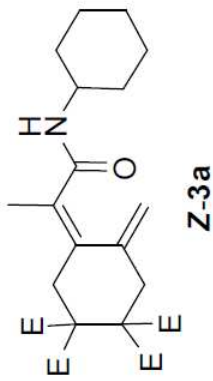

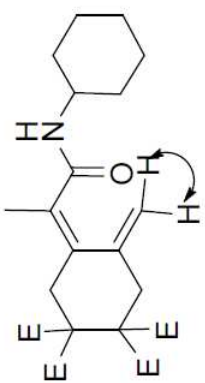

**Z-3a**

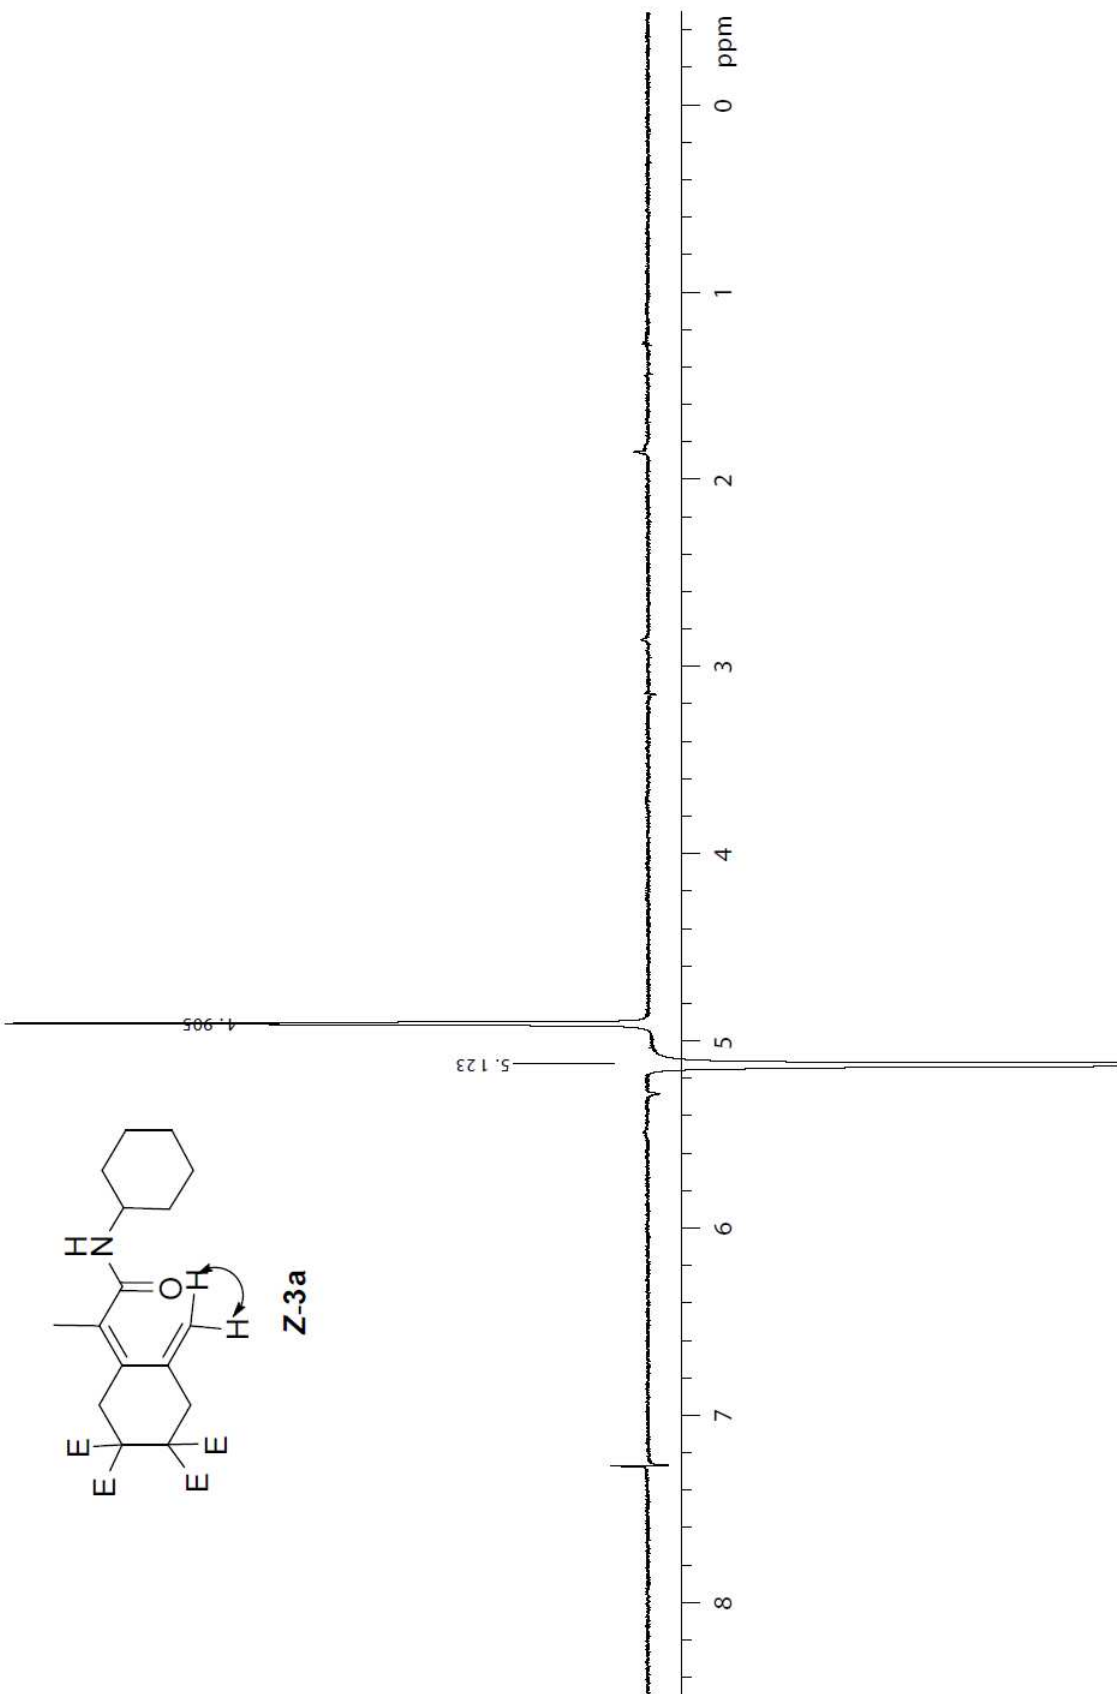

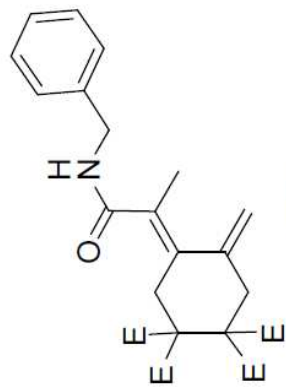

**E-3b**

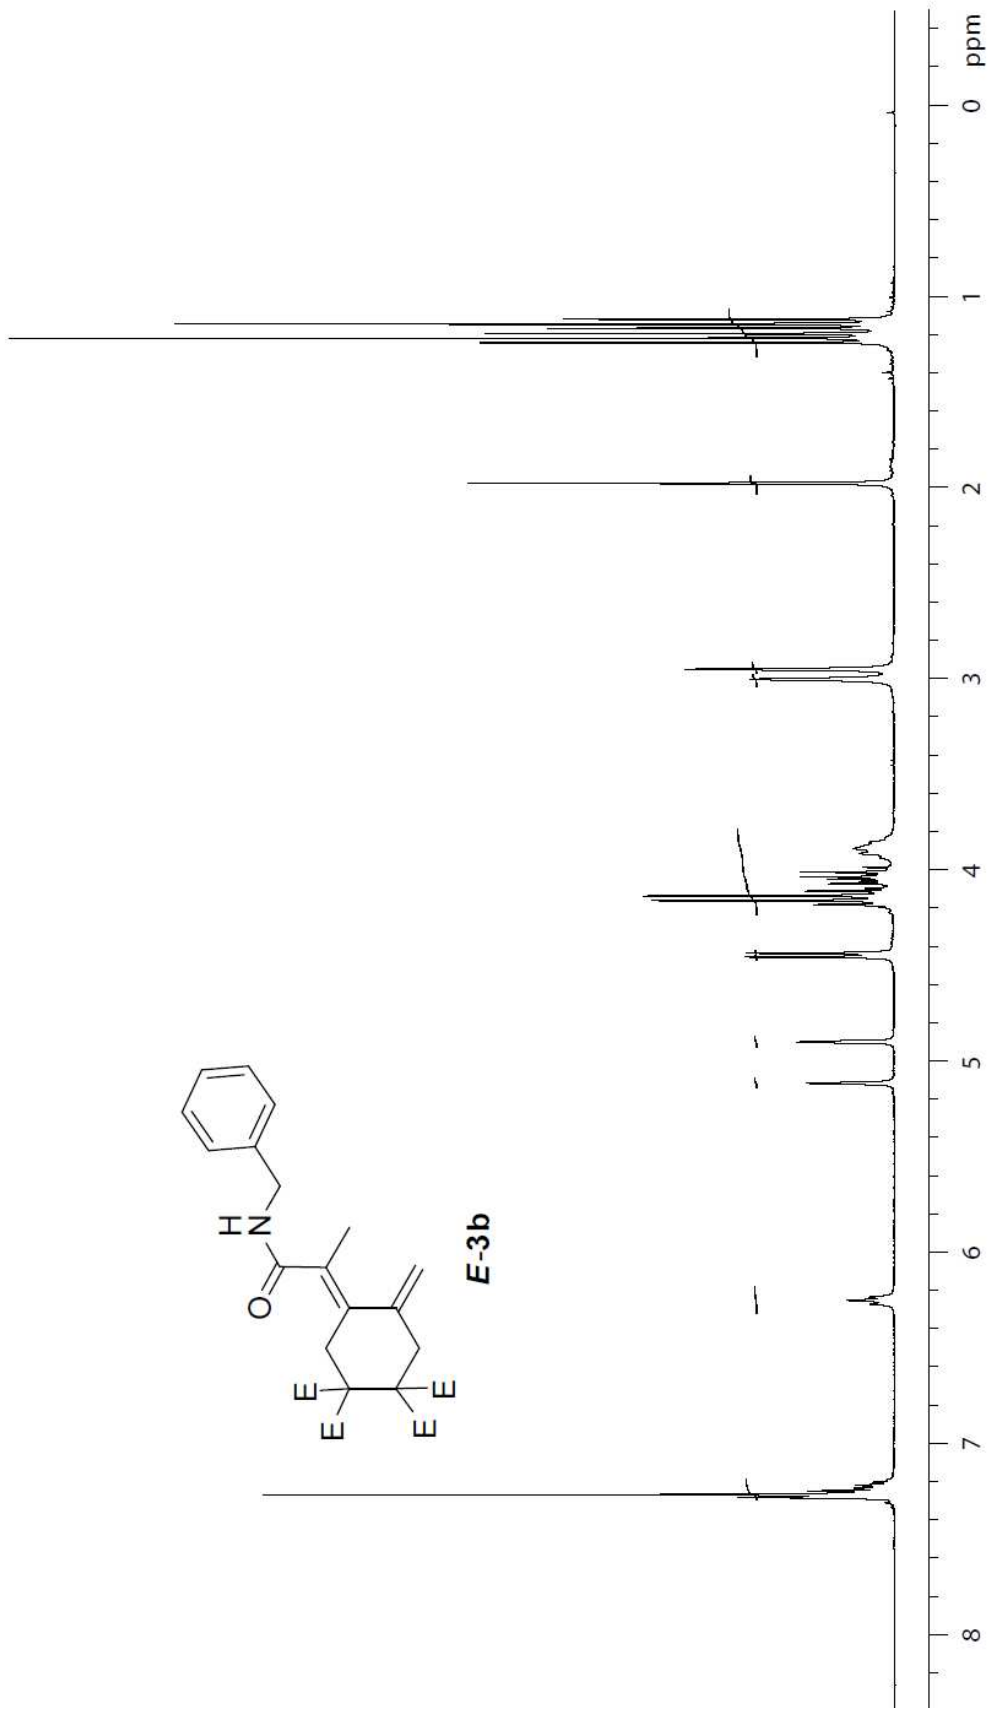

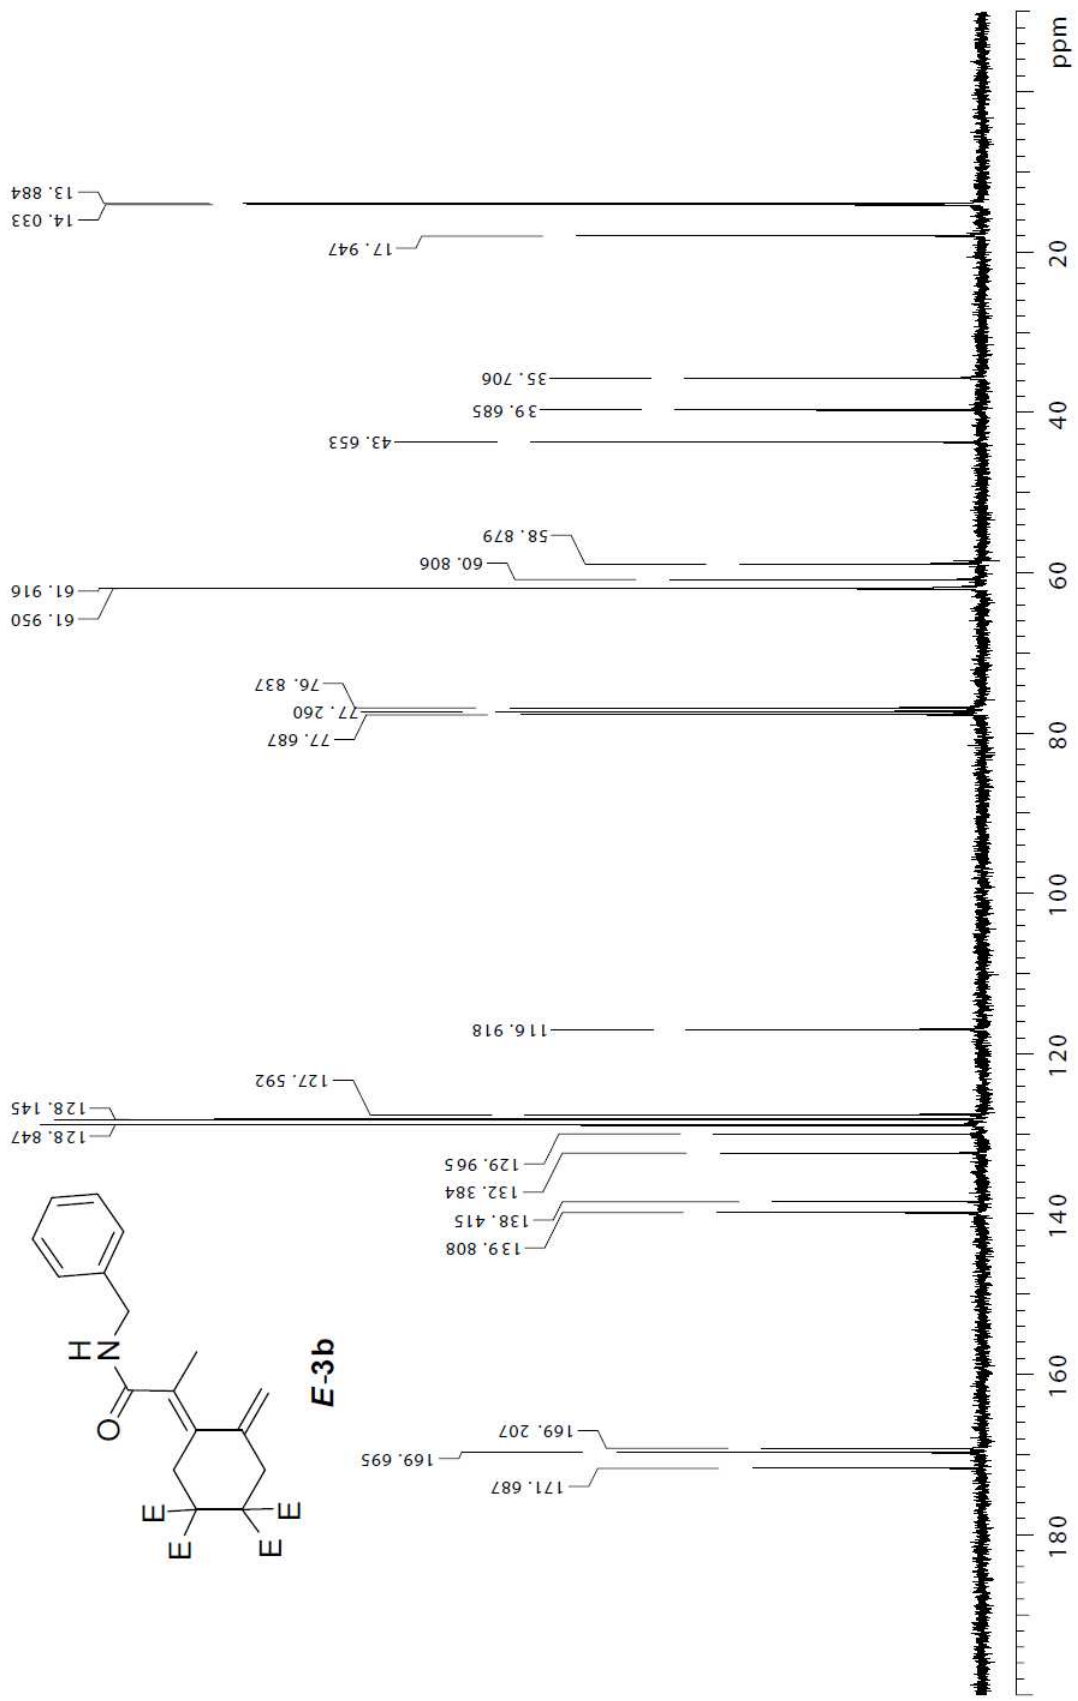

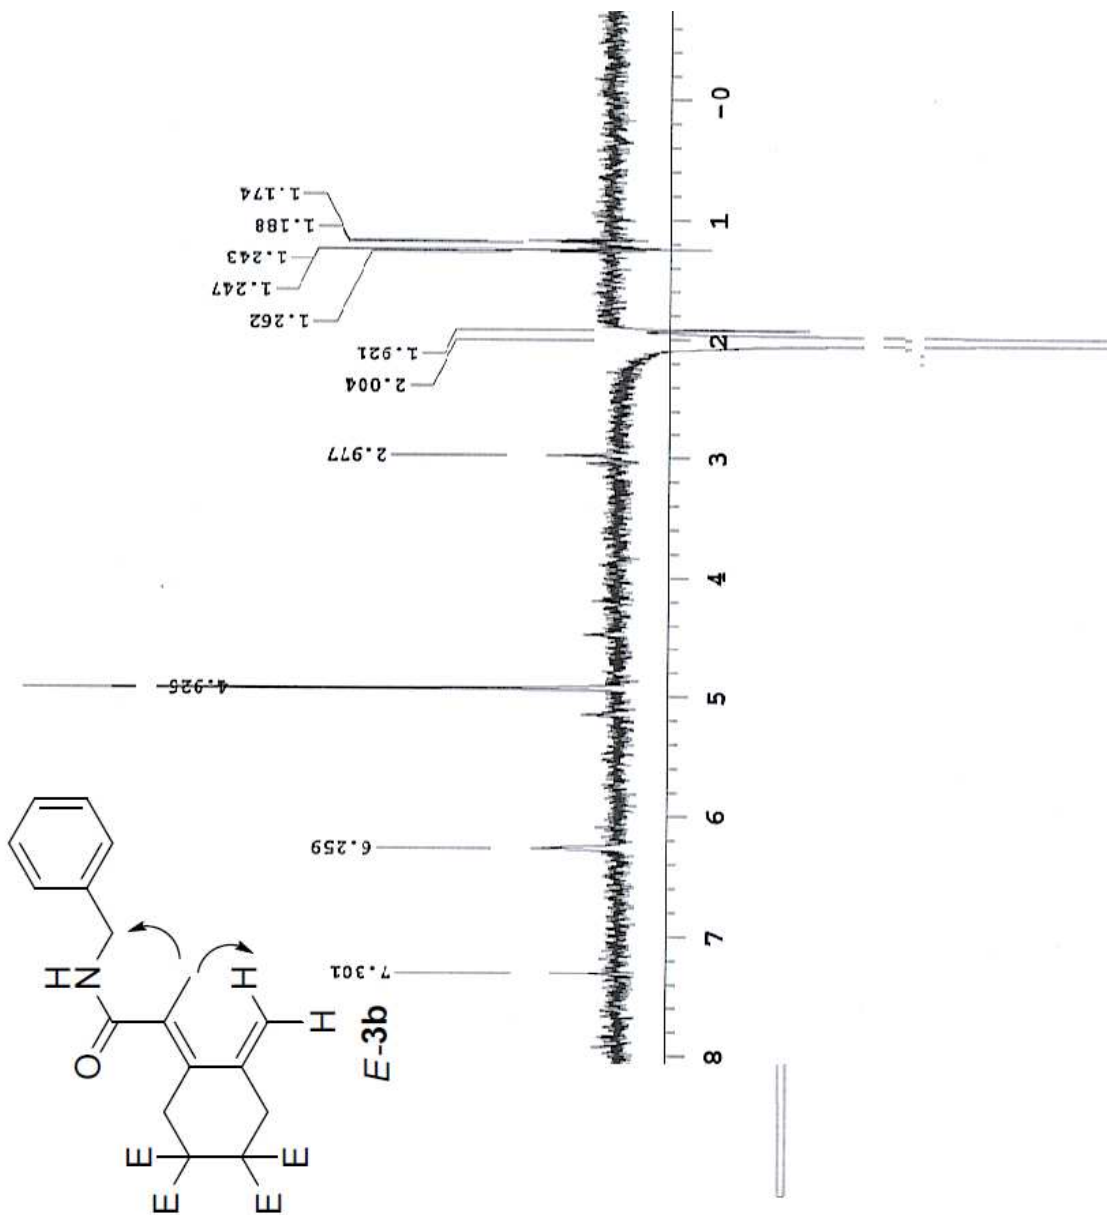



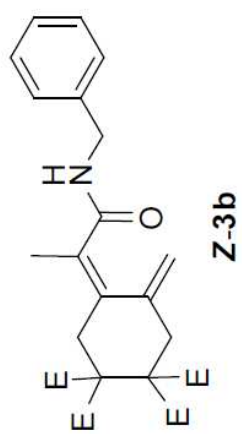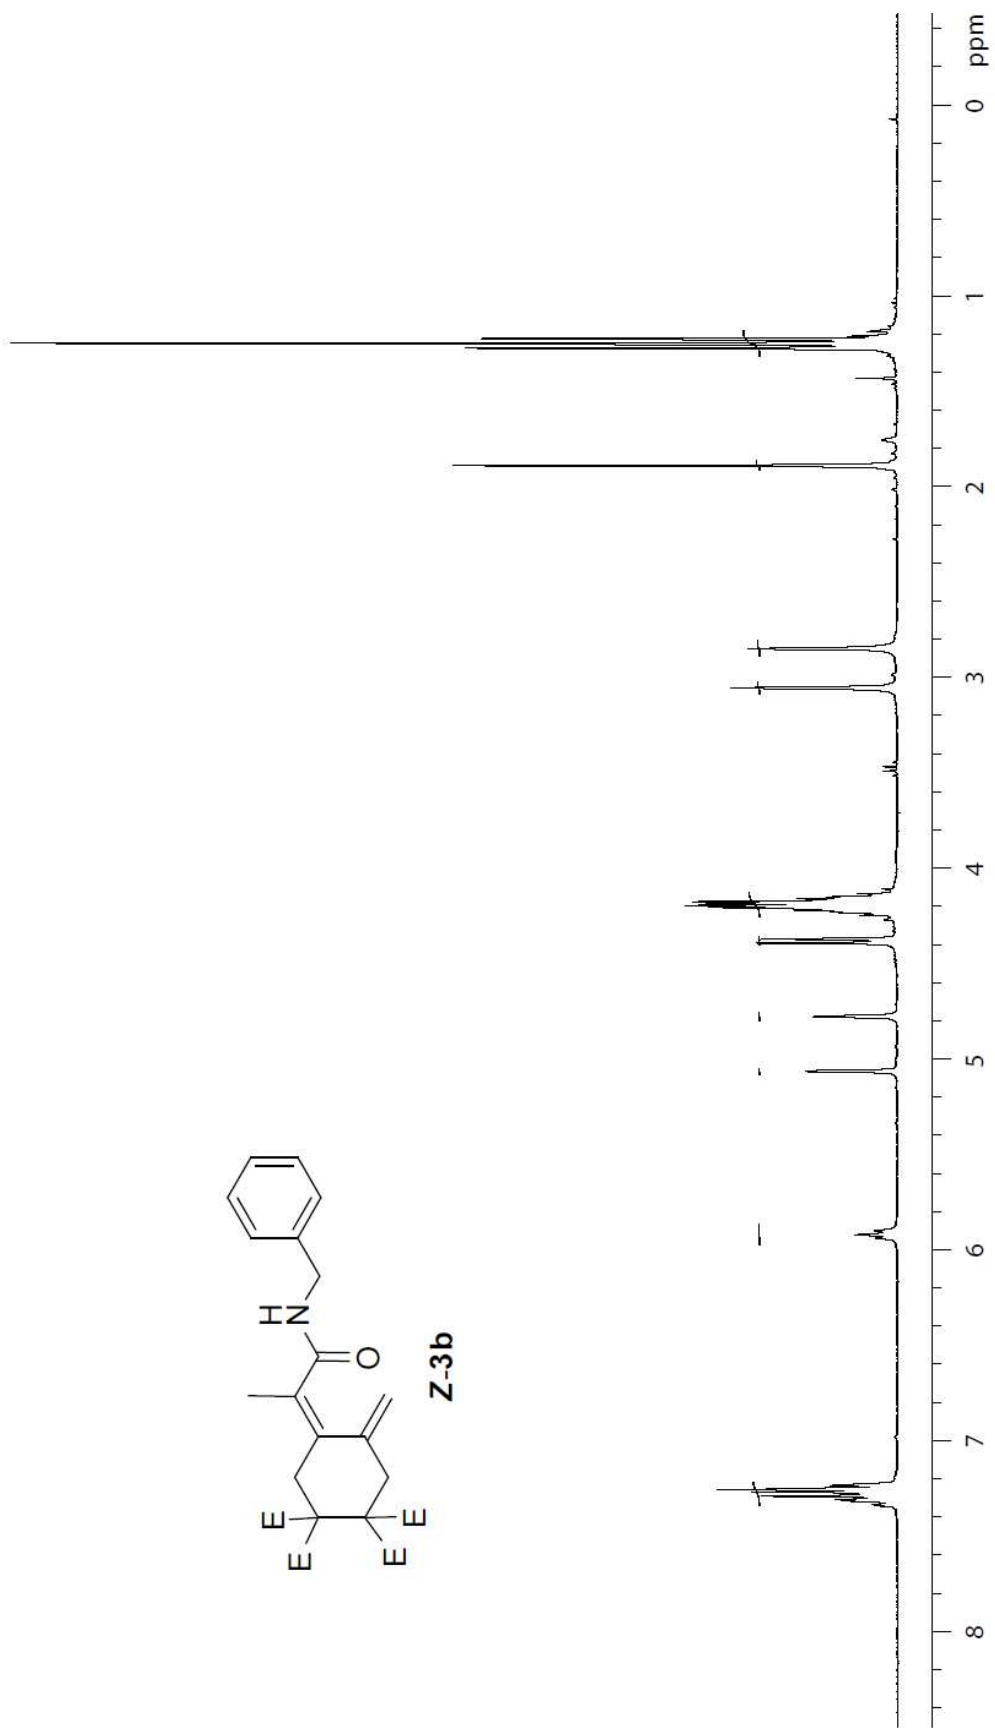

Archive directory: /home/nmr/brendan/vnmrnsys/data  
Sample directory:  
F1: CARBON  
Pul 3: Sequence: s2pul

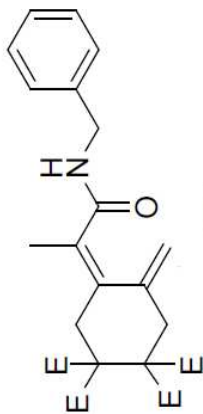

Z-3b

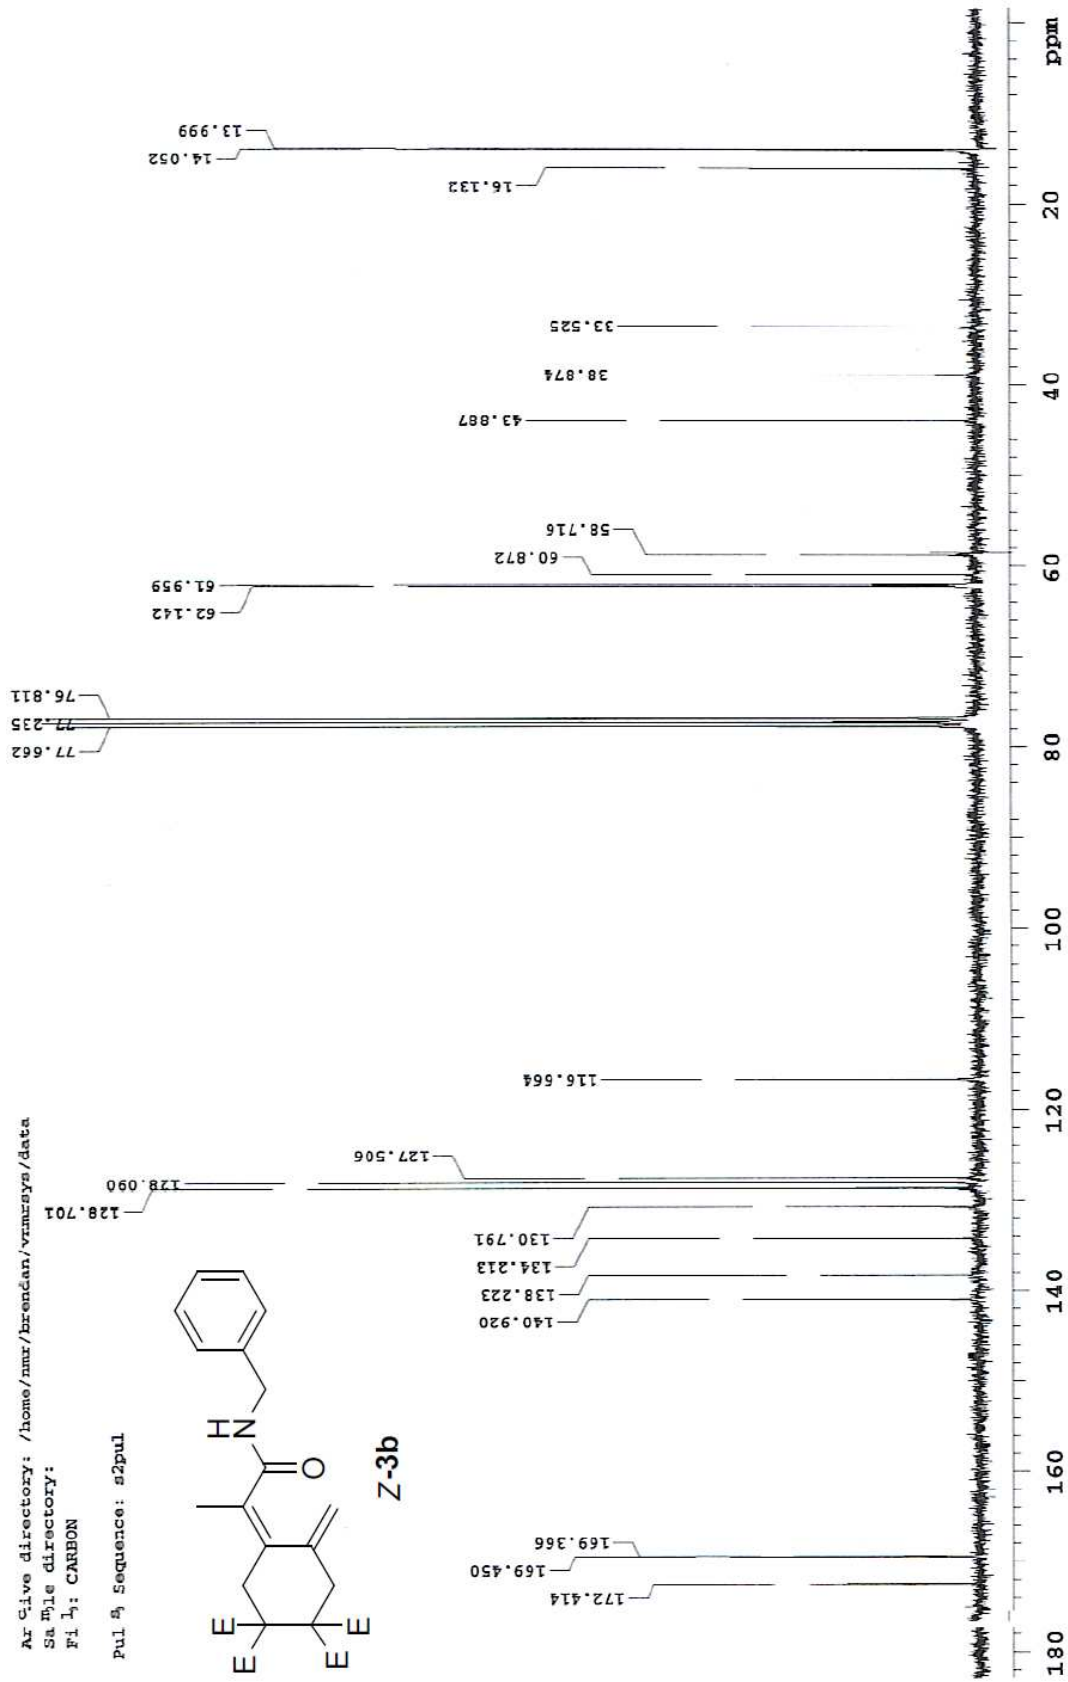

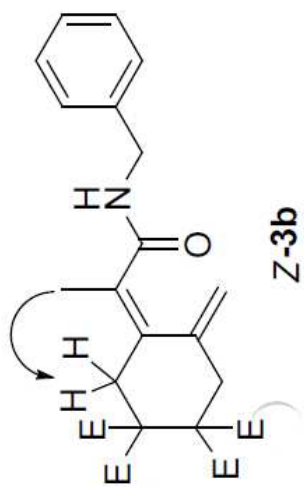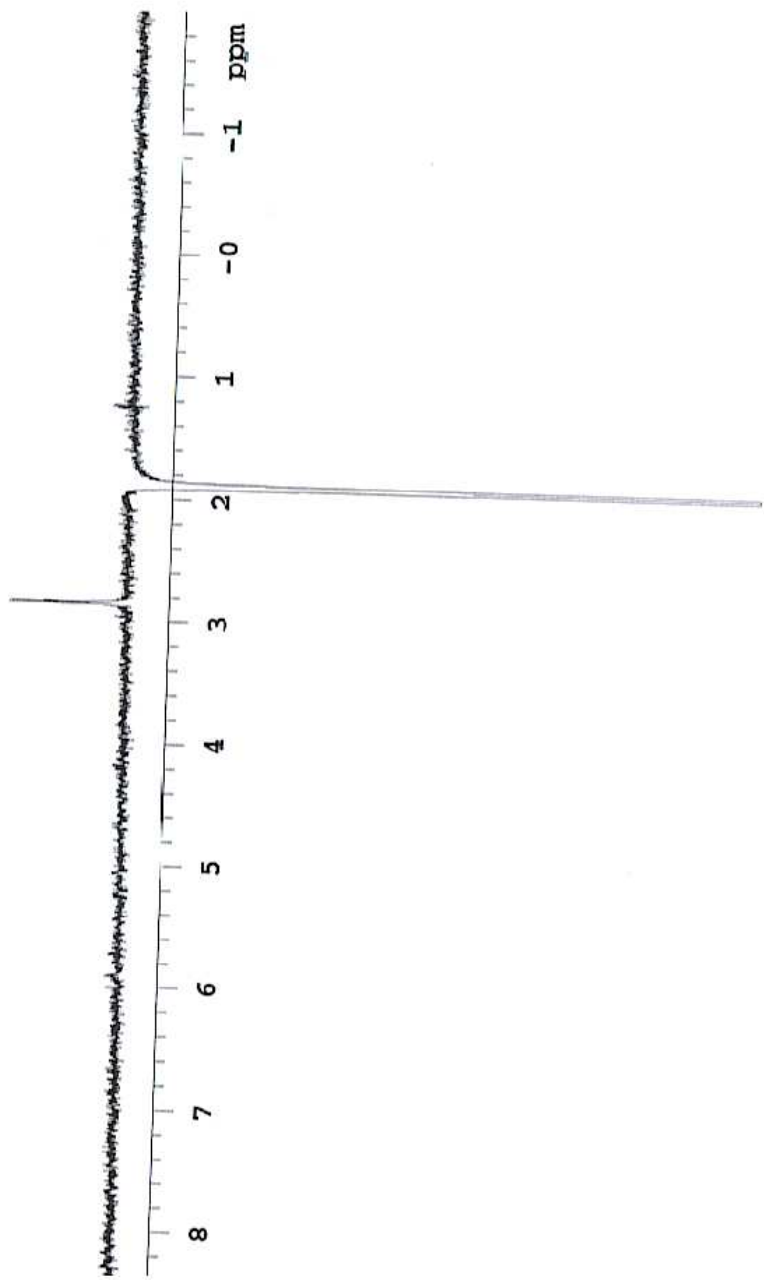

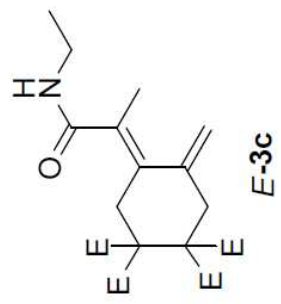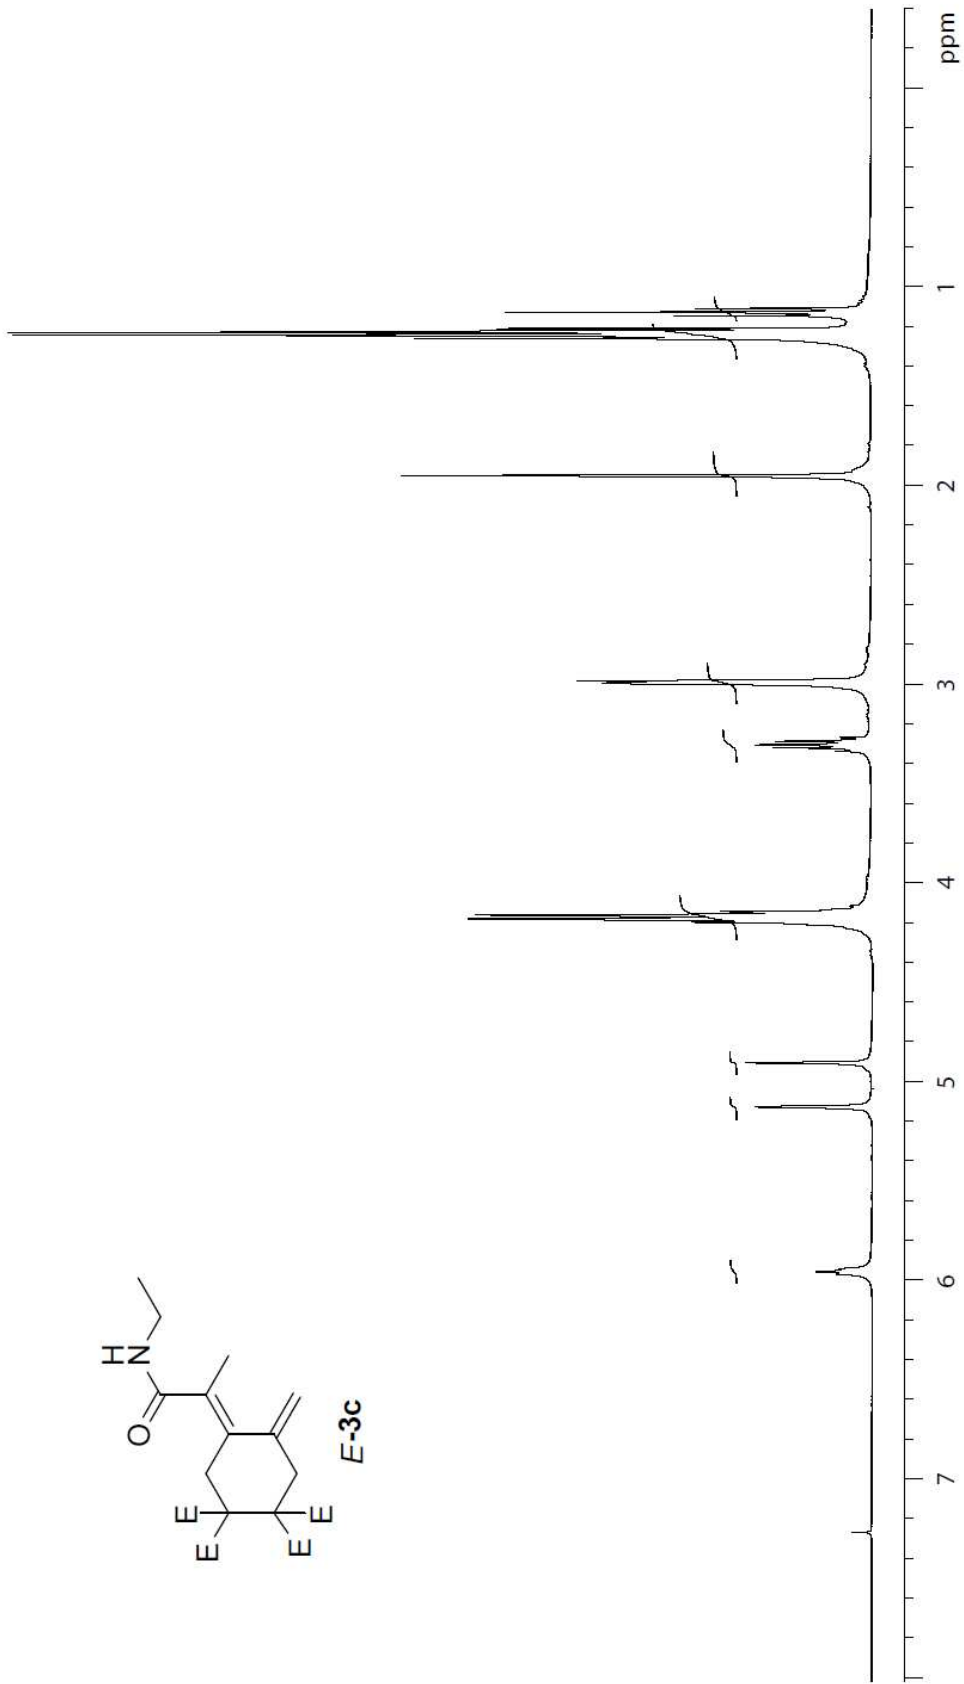

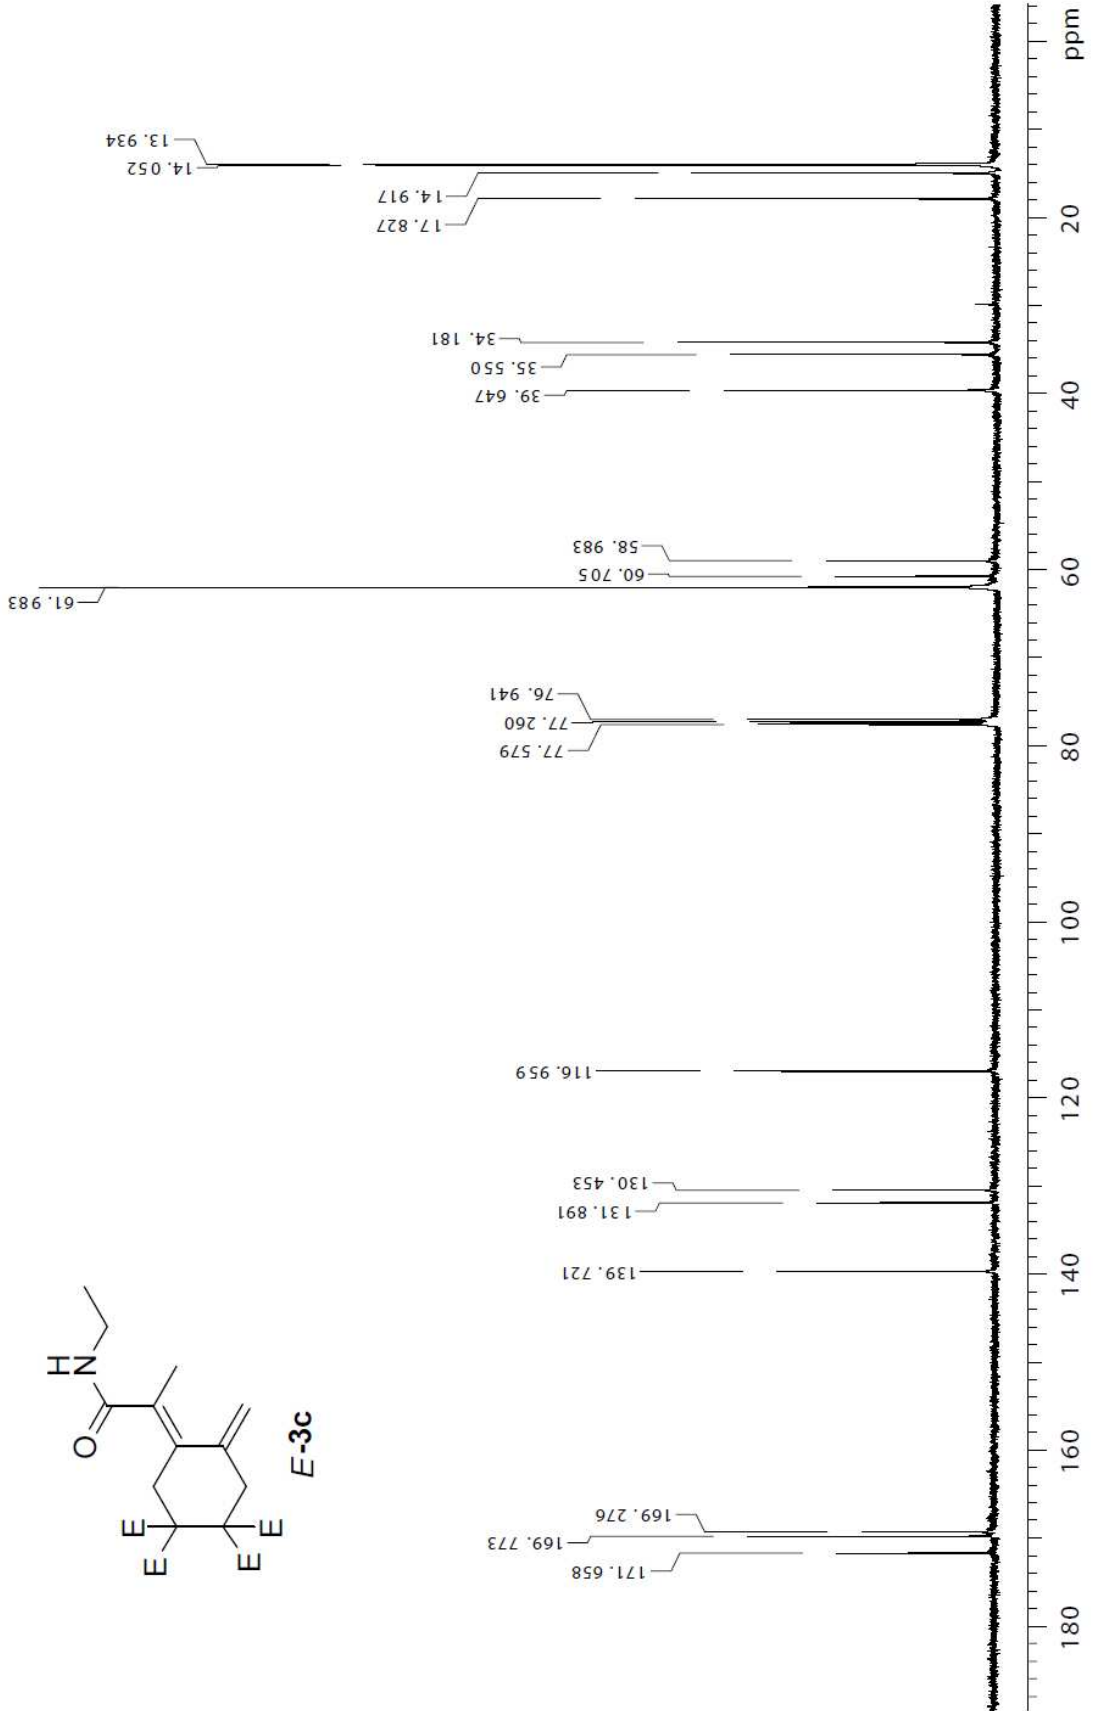

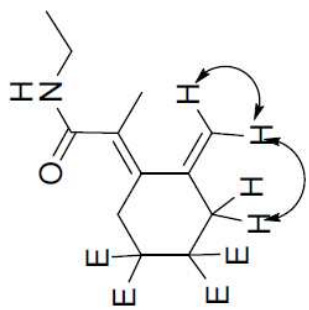

**E-3c**

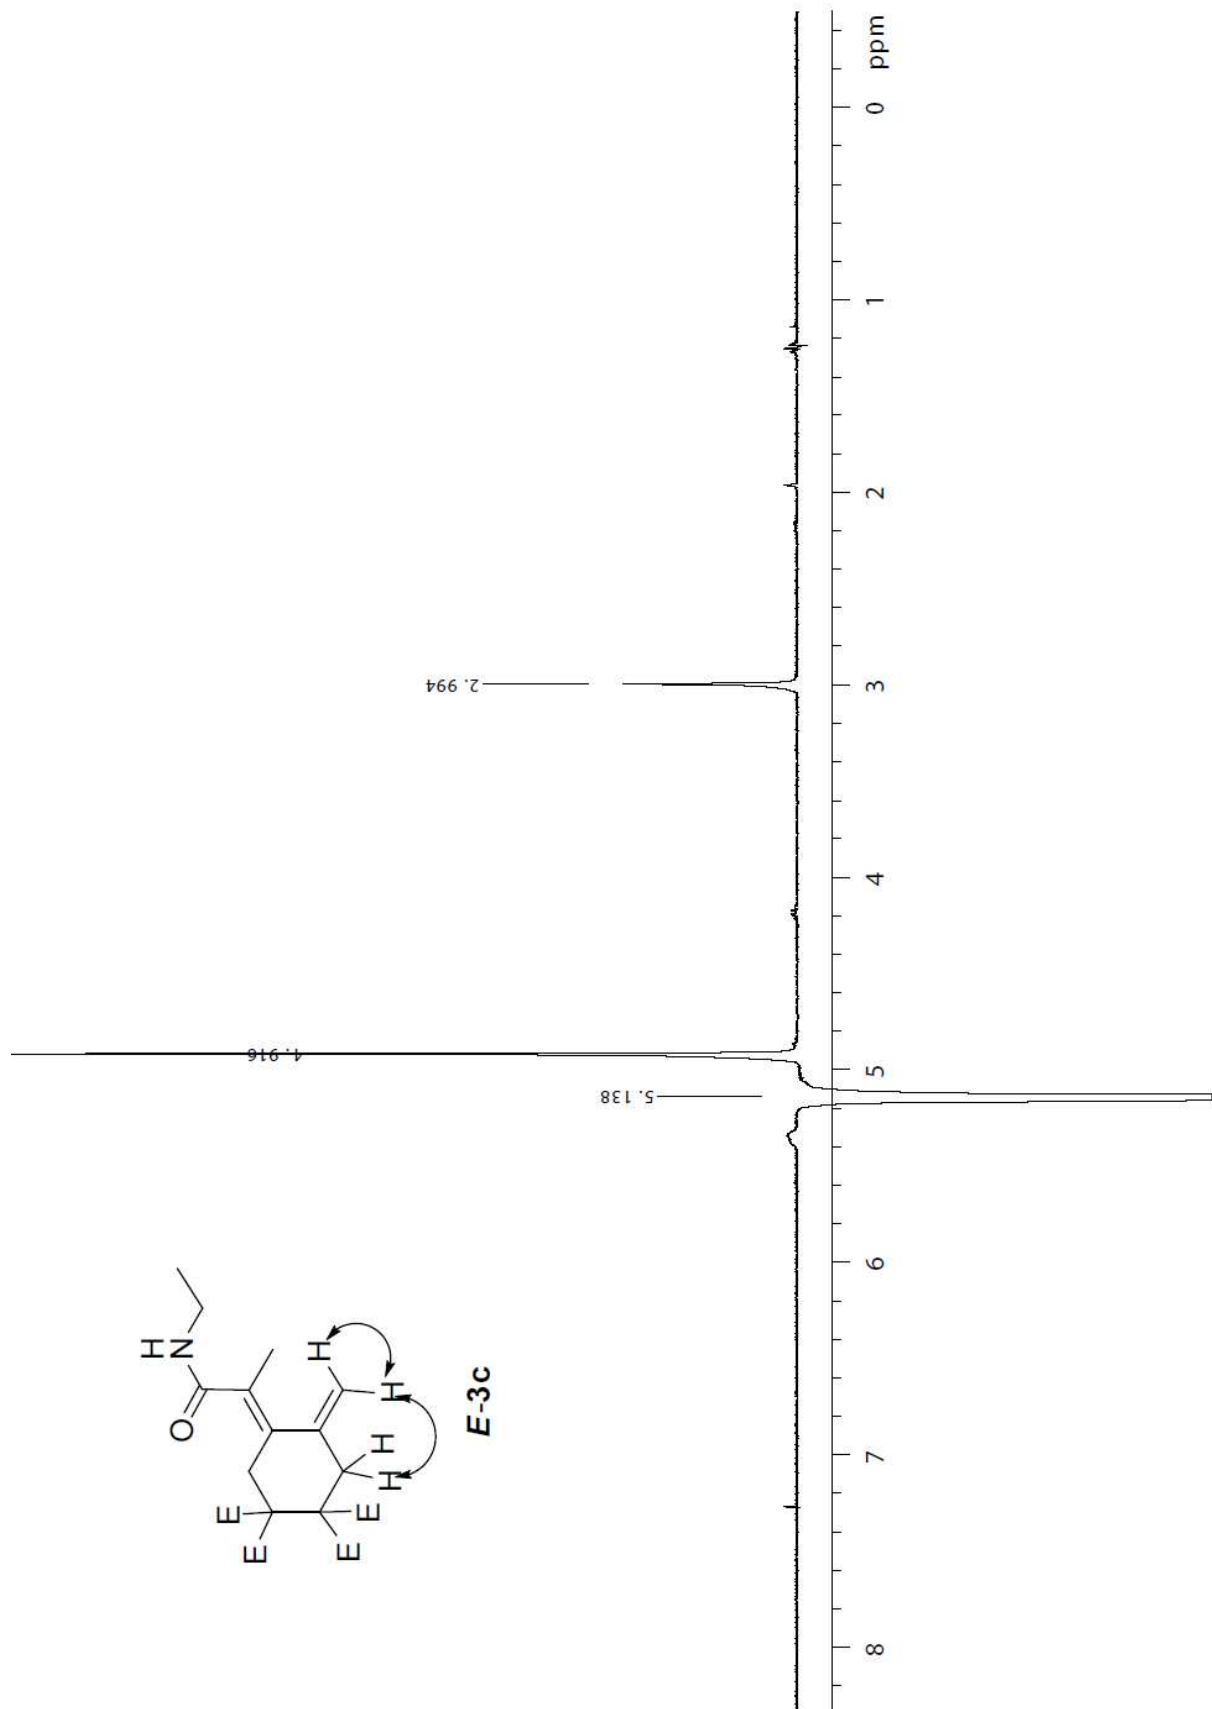

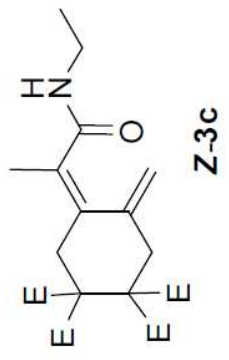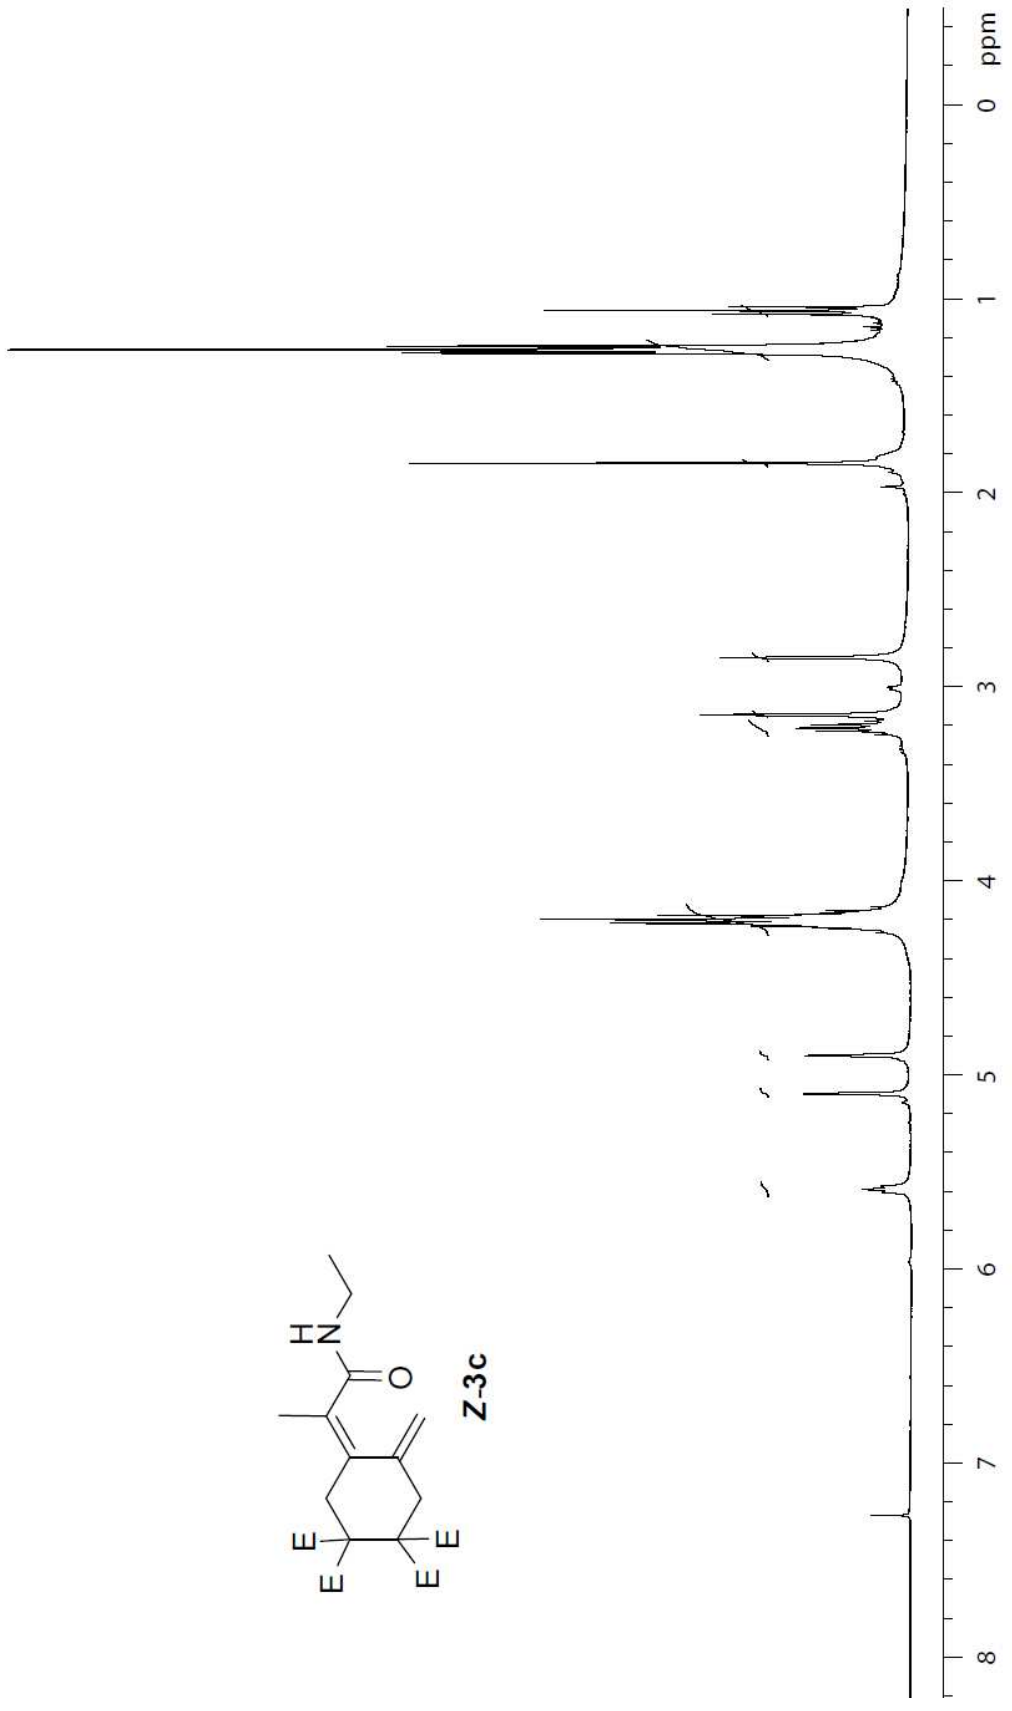

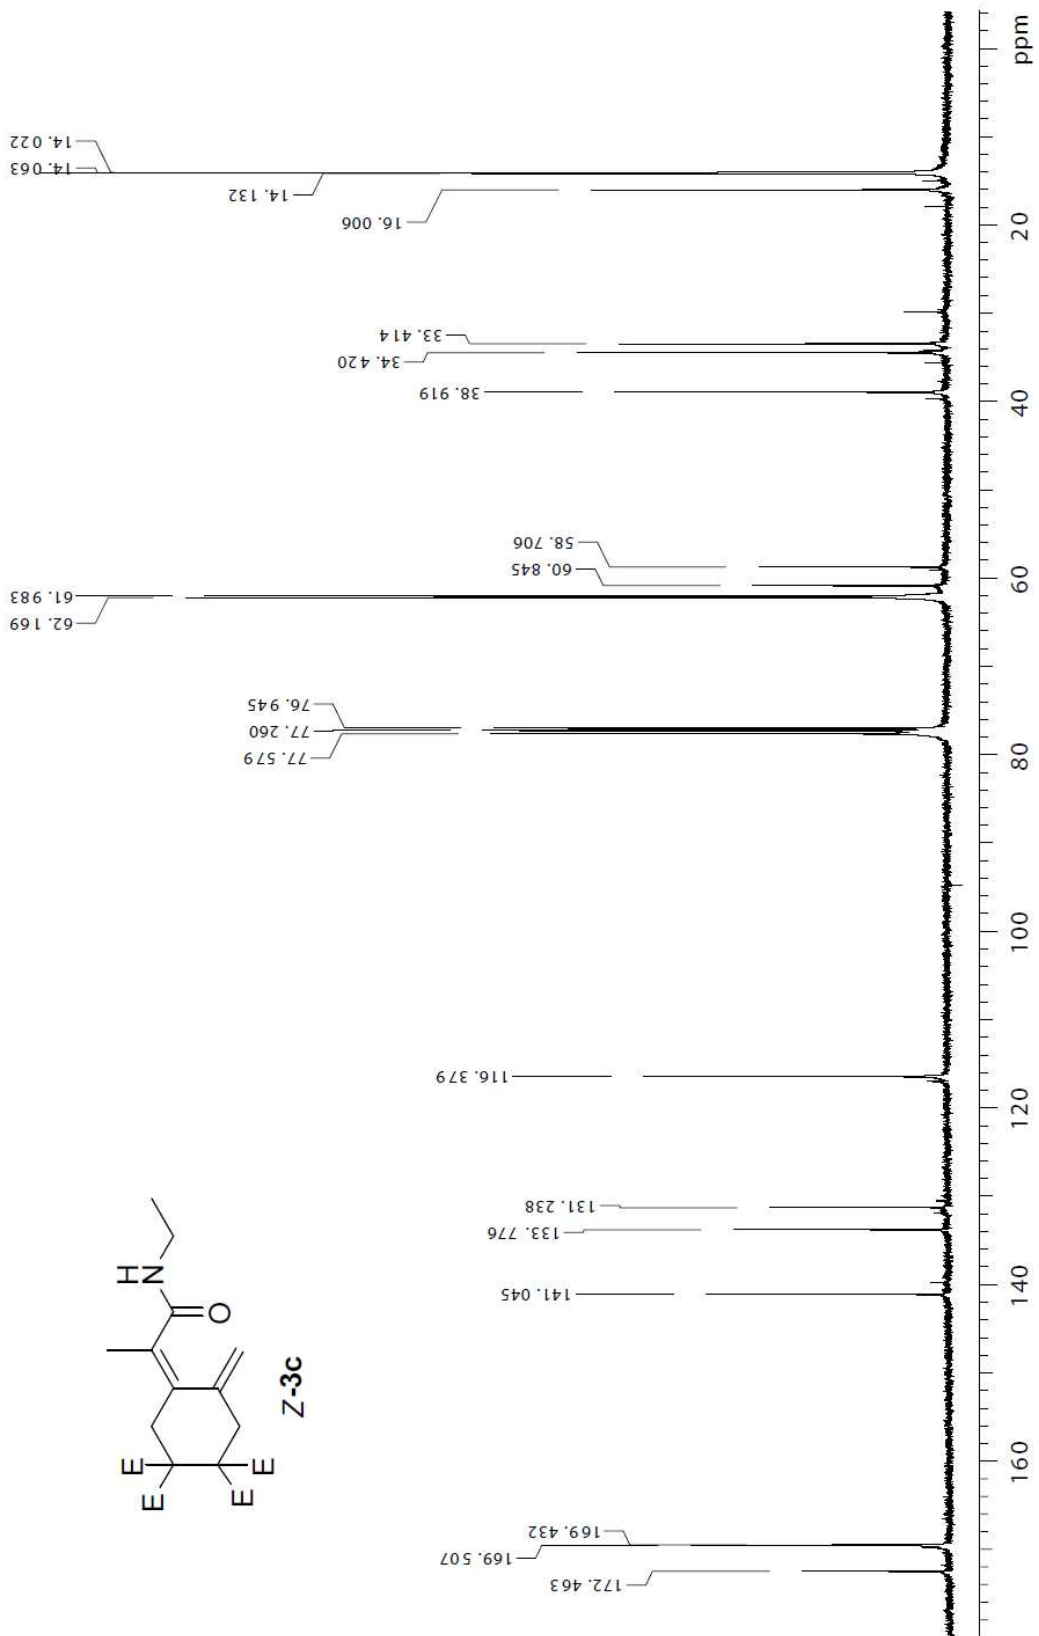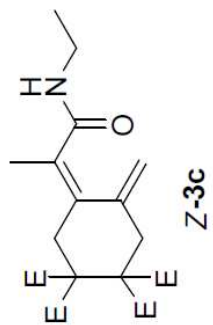



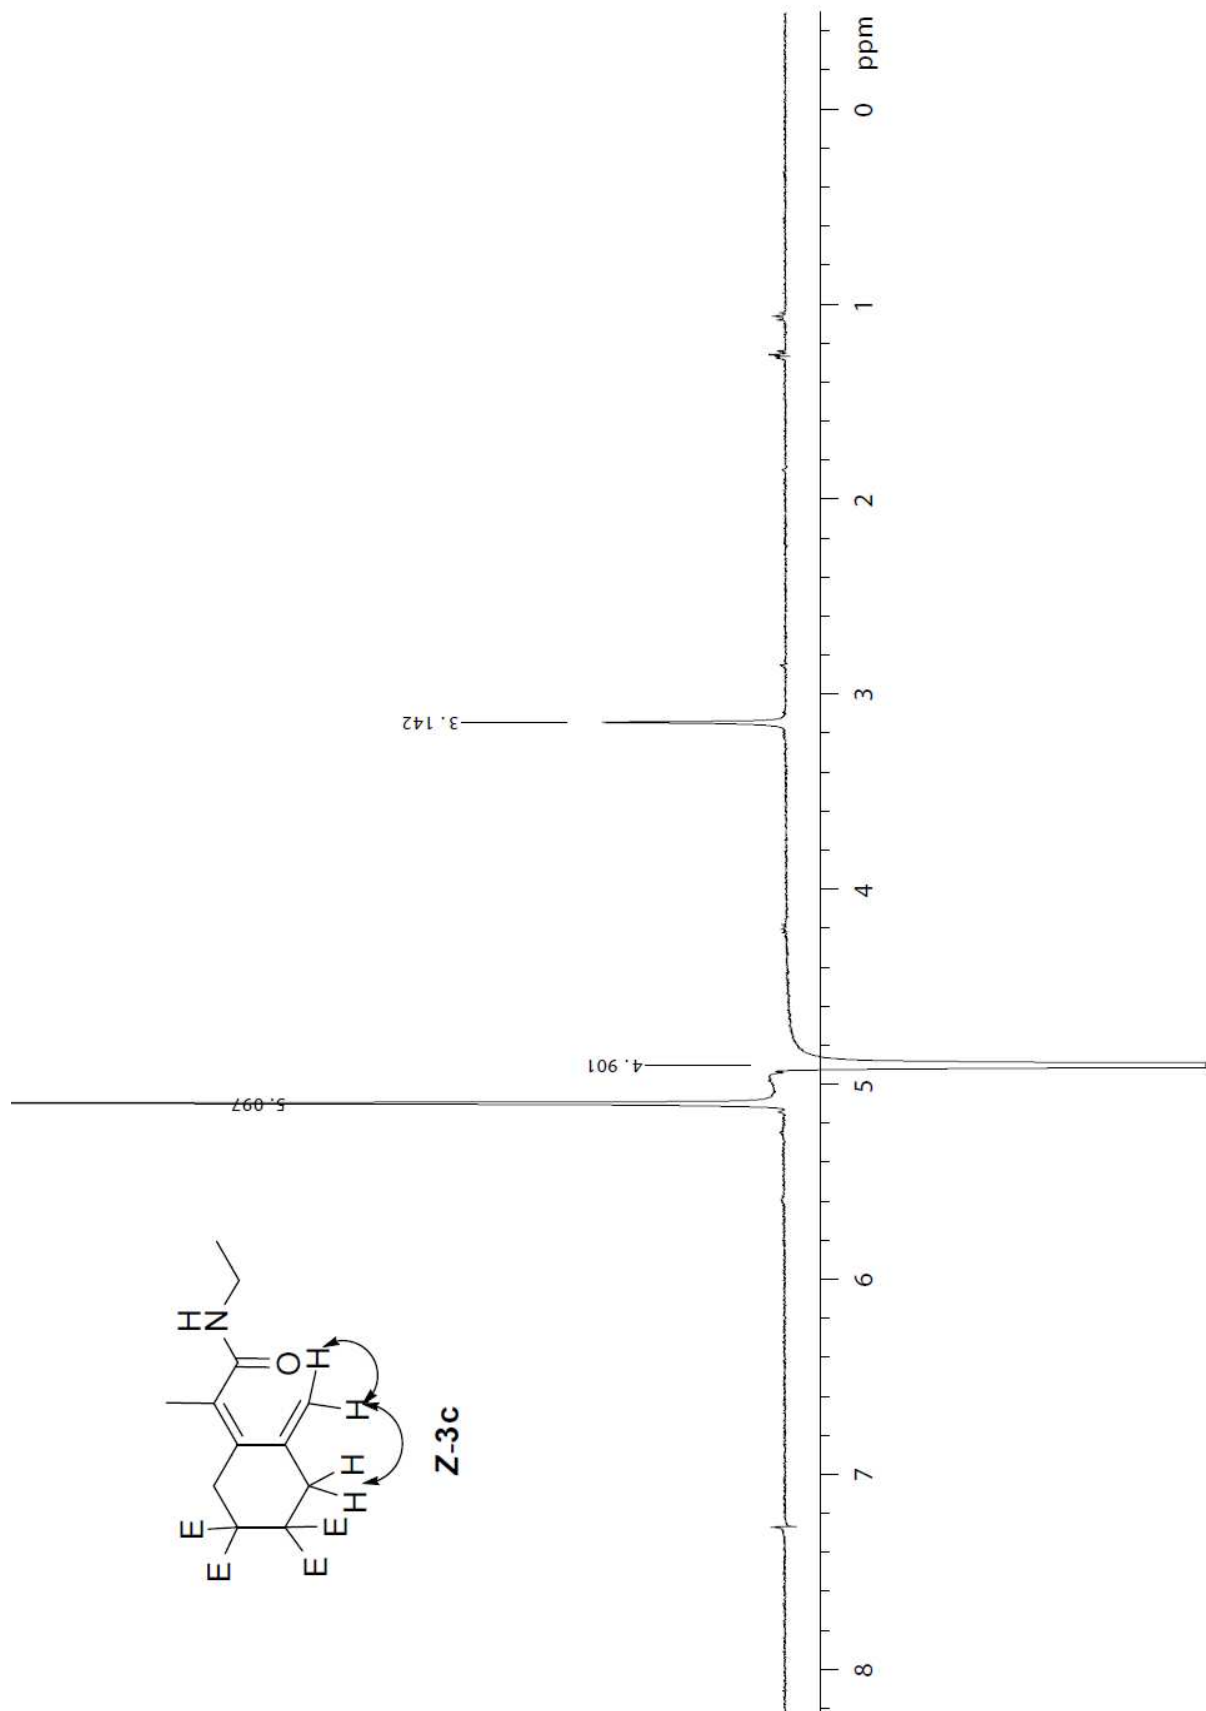

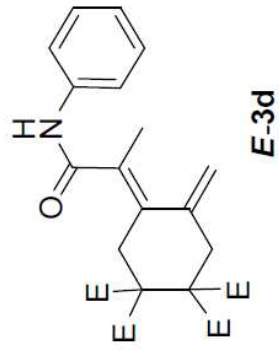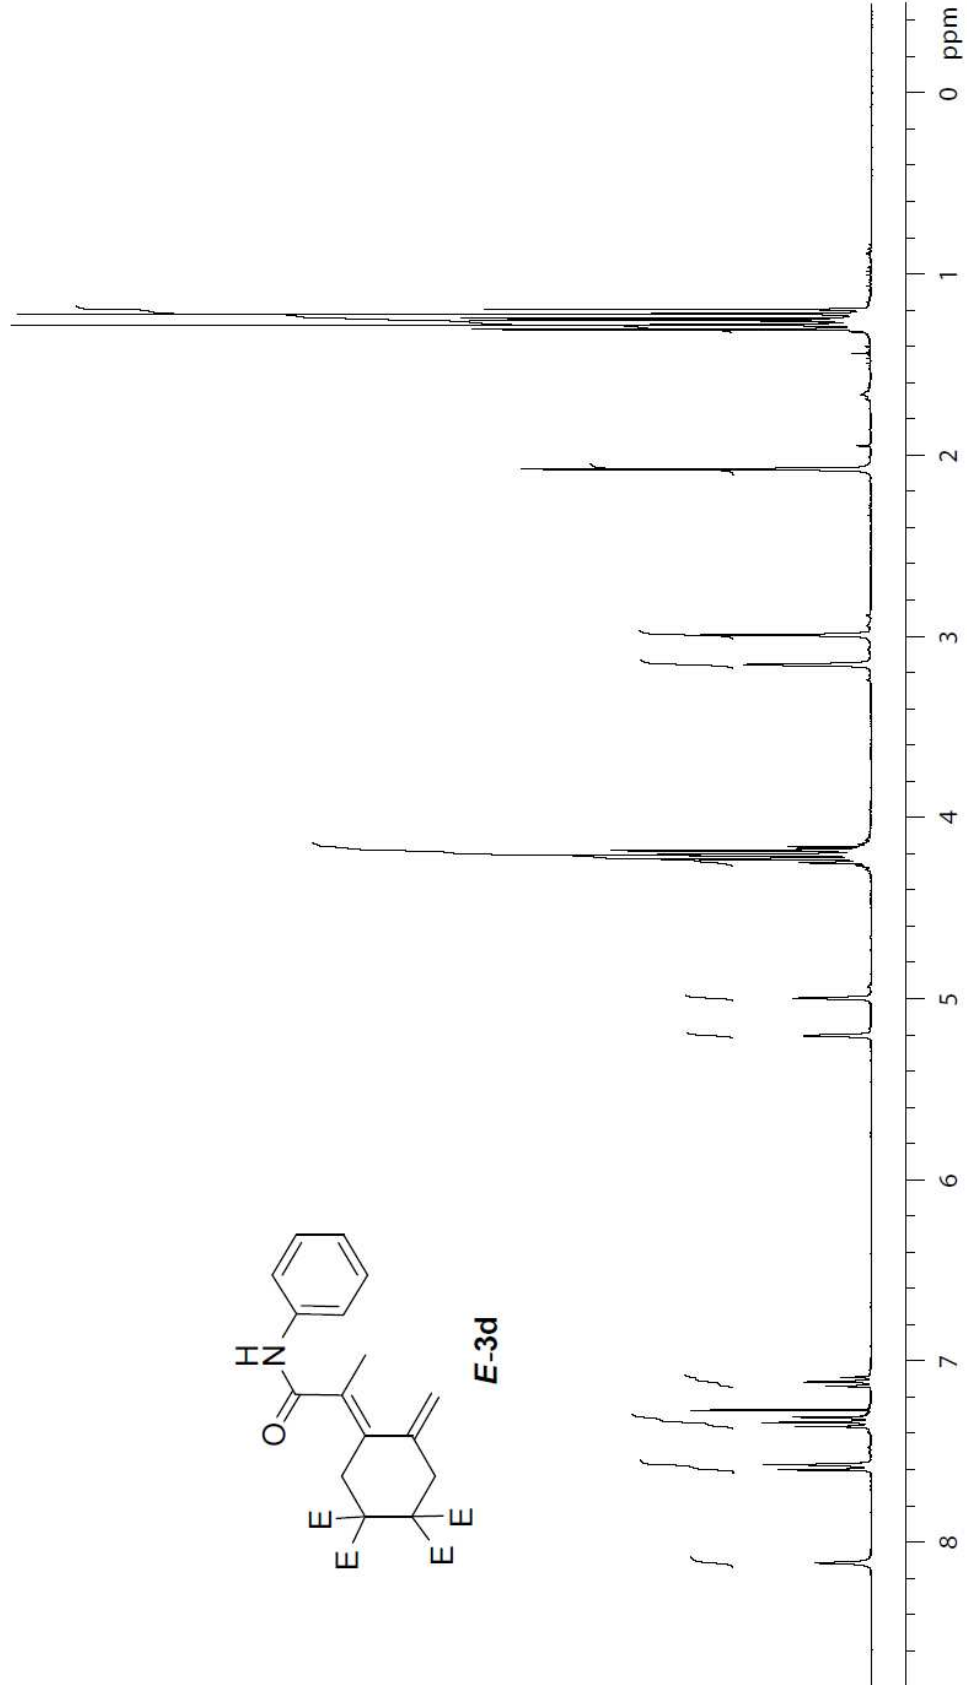

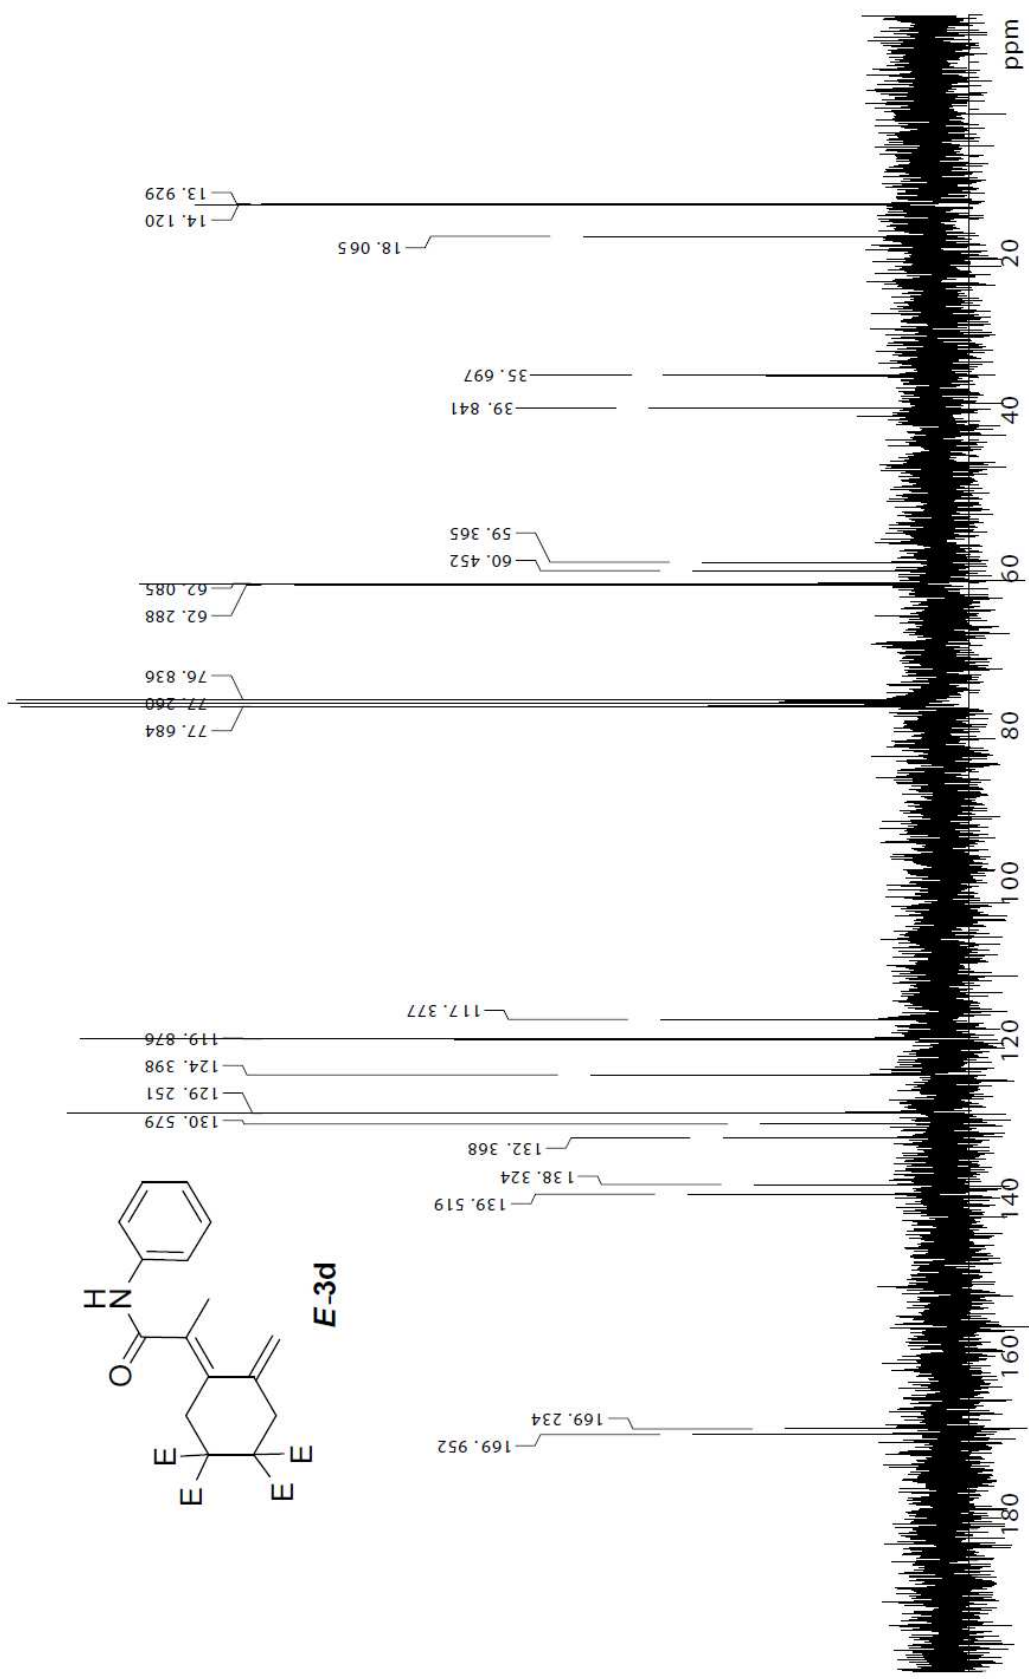

ulse Sequence: NOESY1D

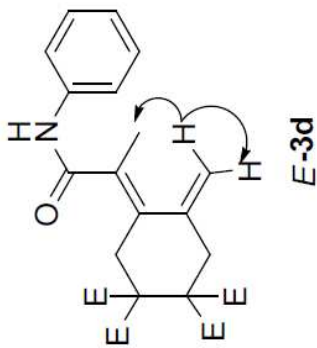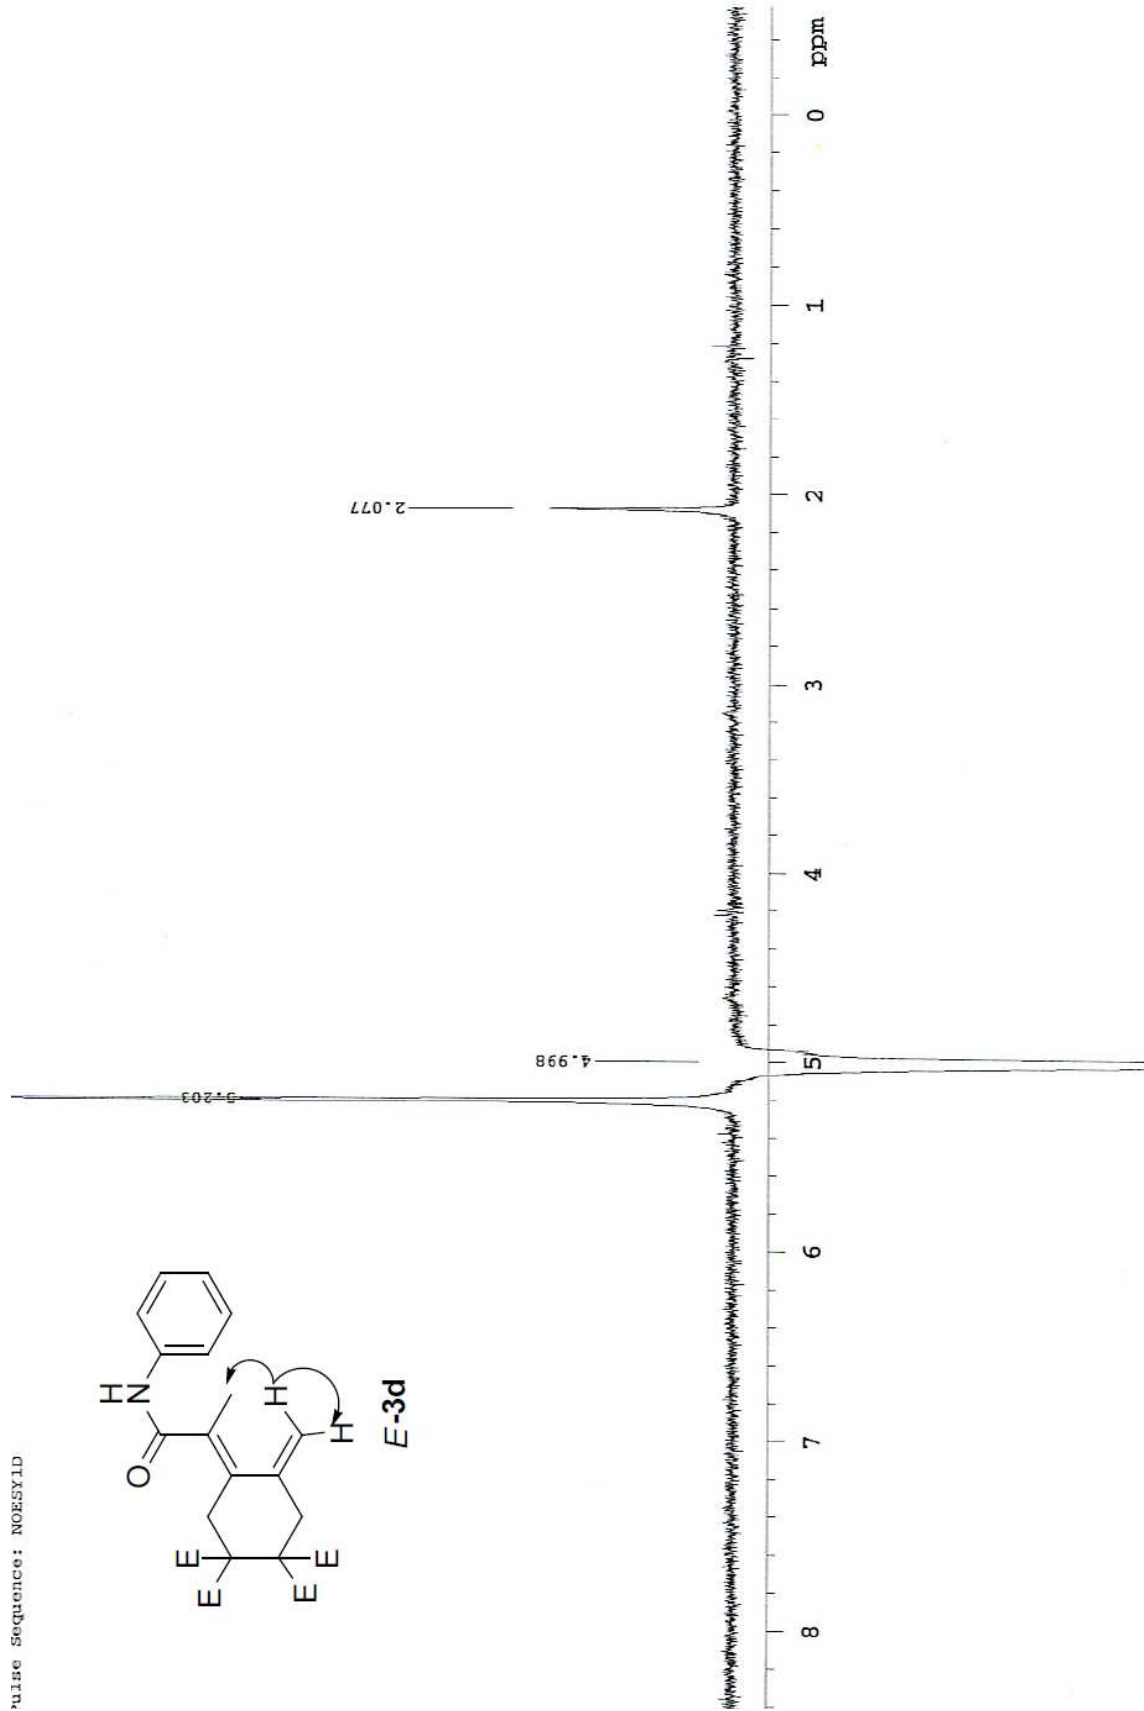

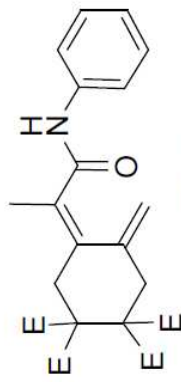

Z-3d

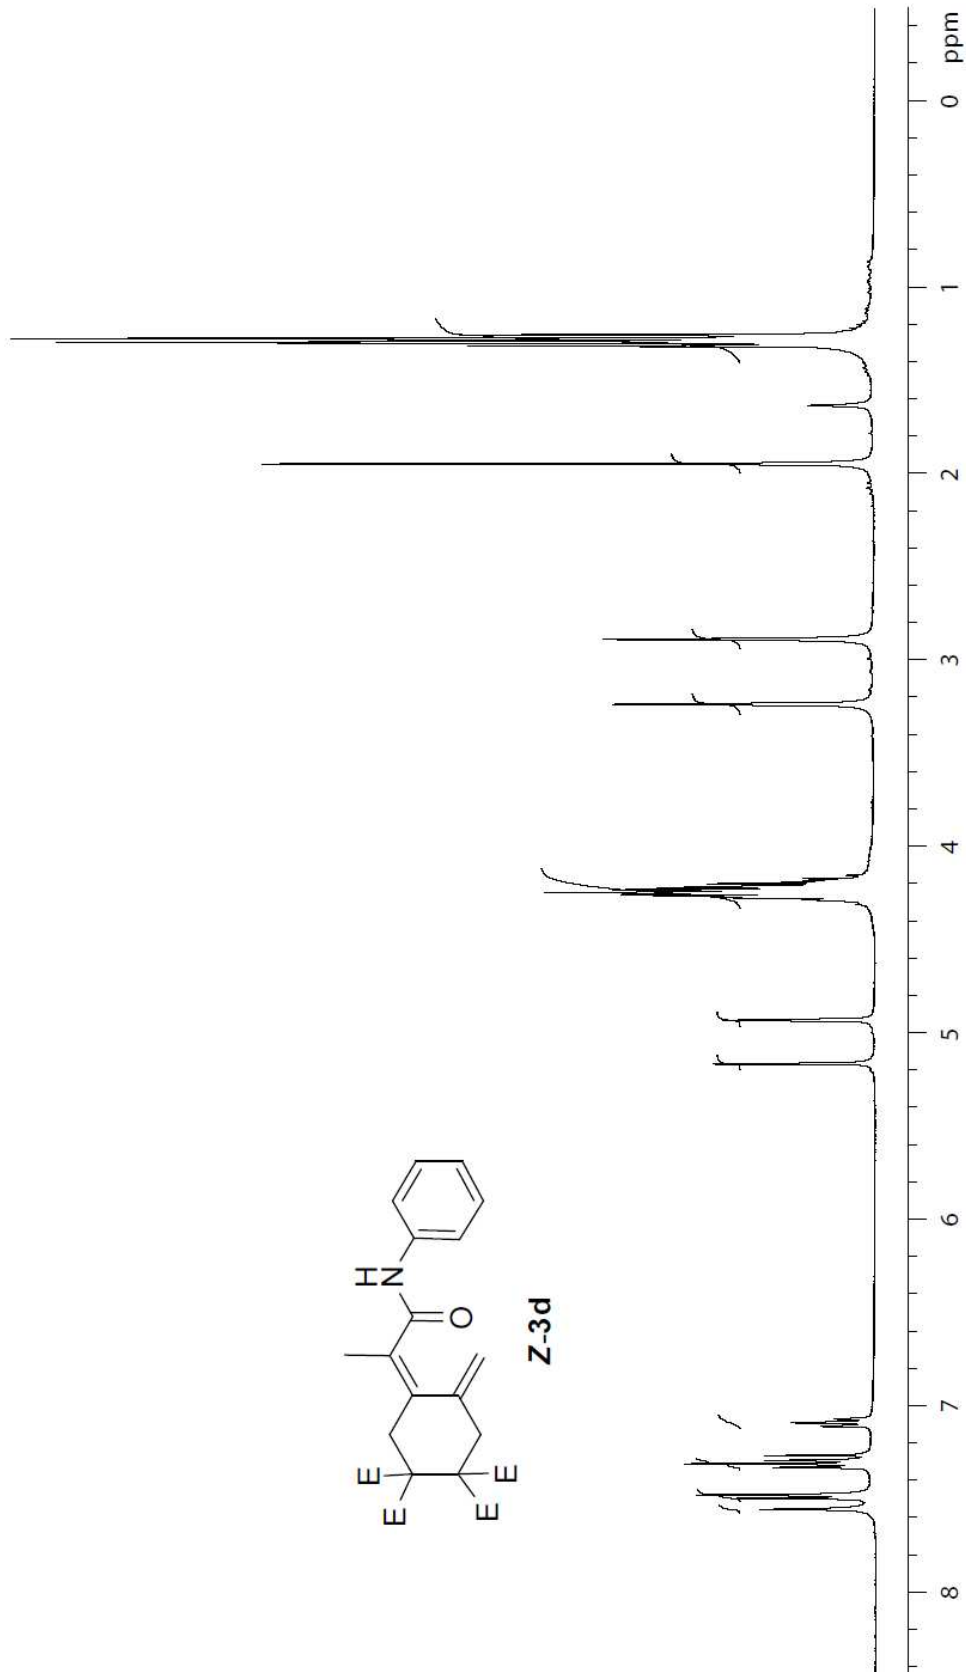

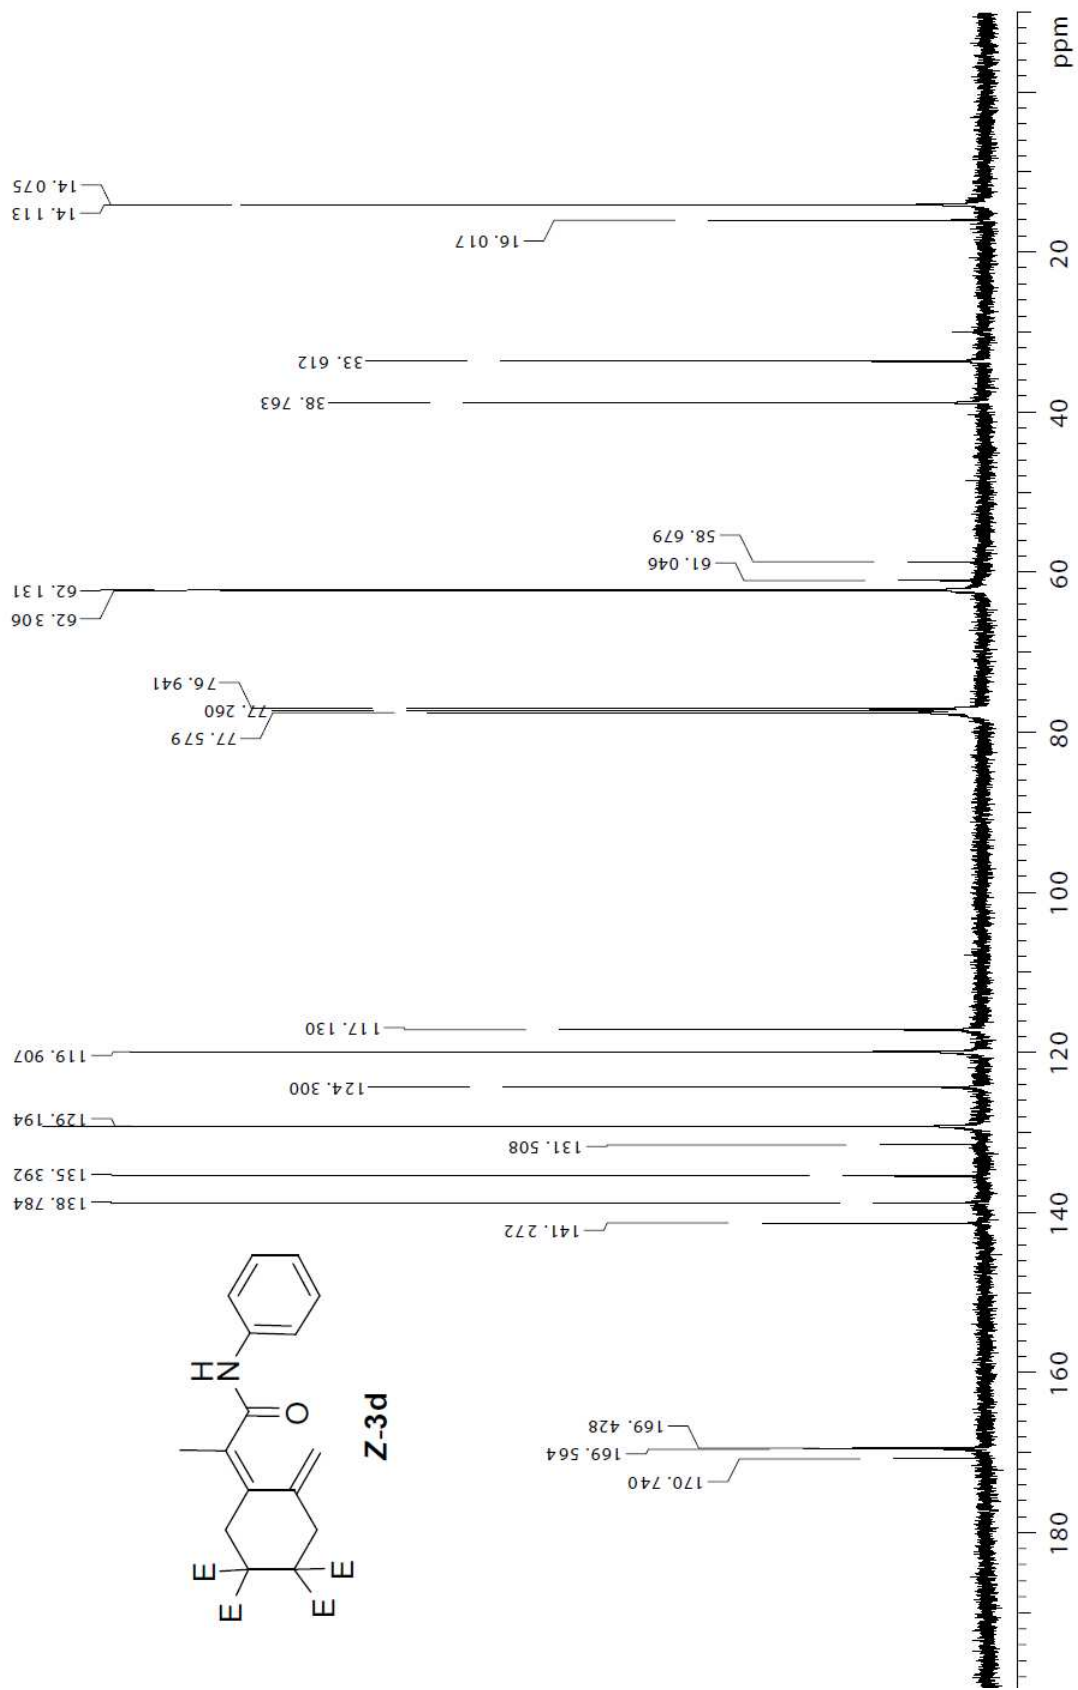

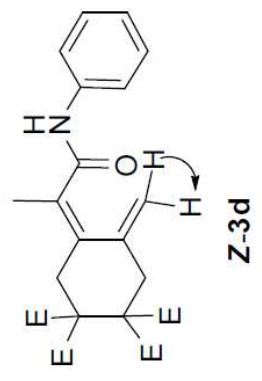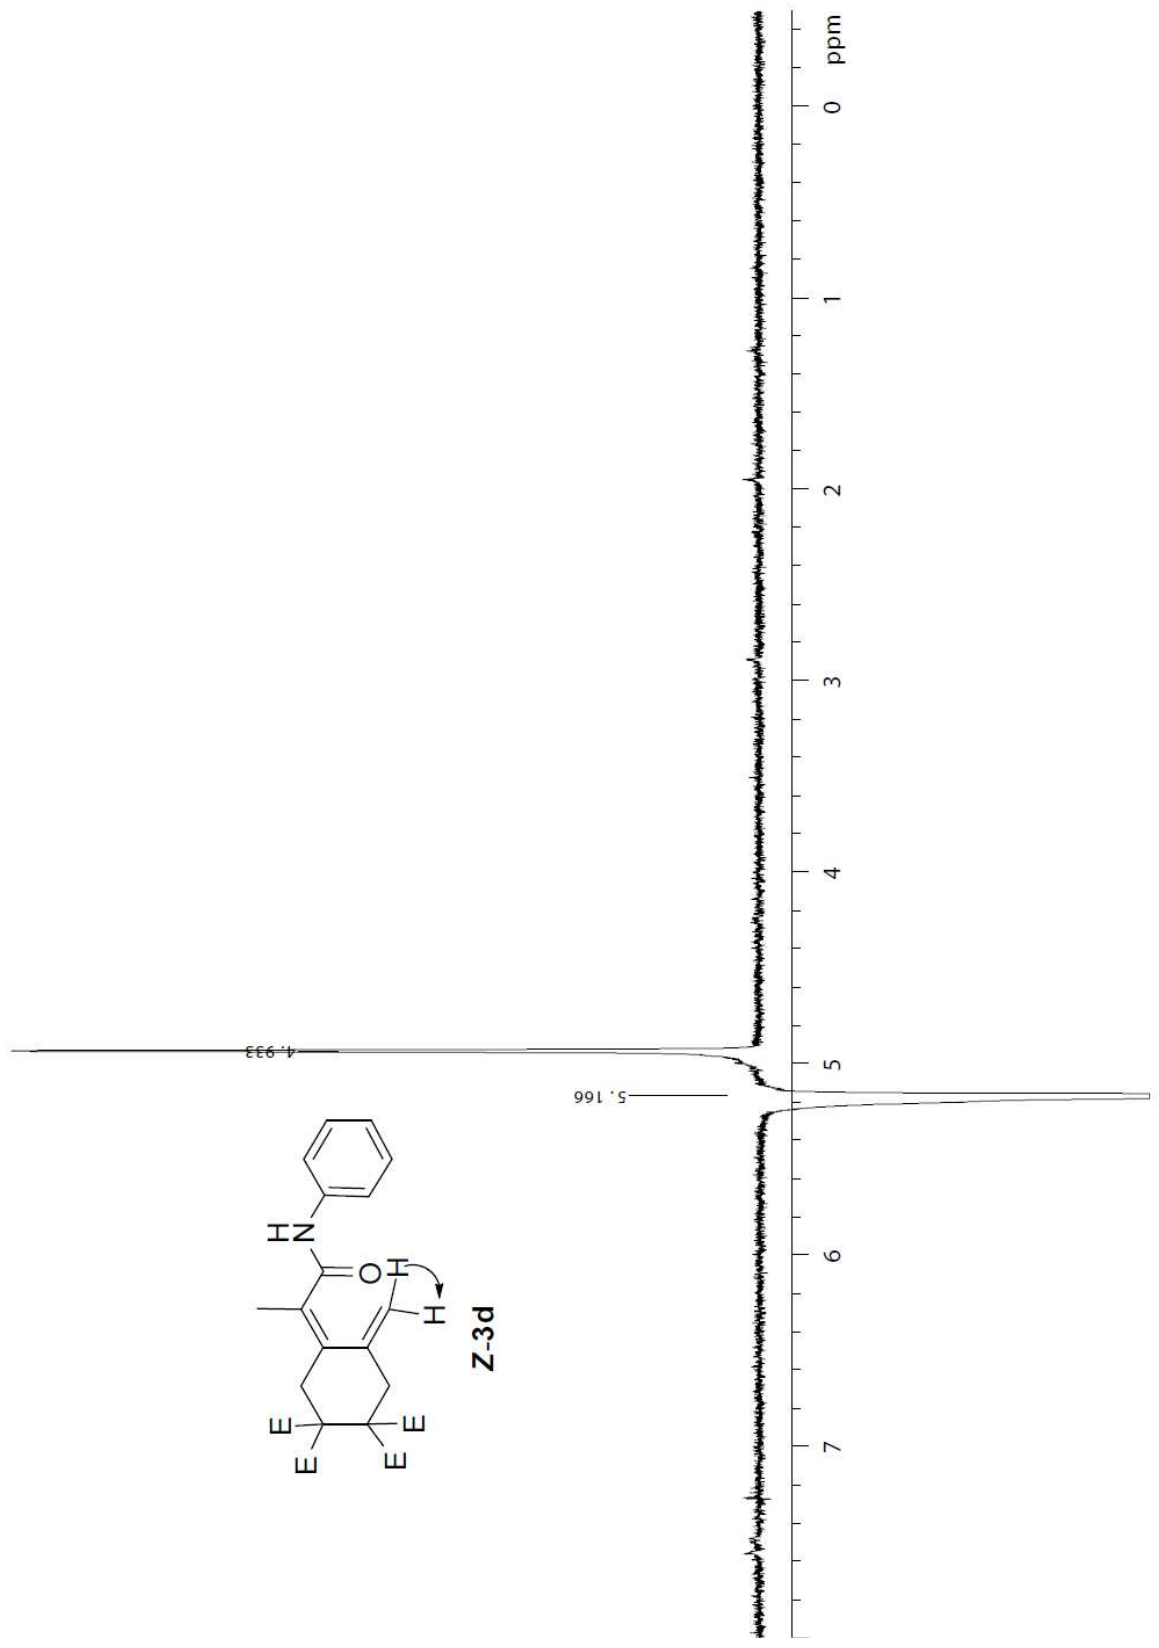

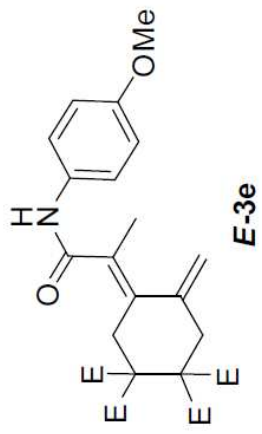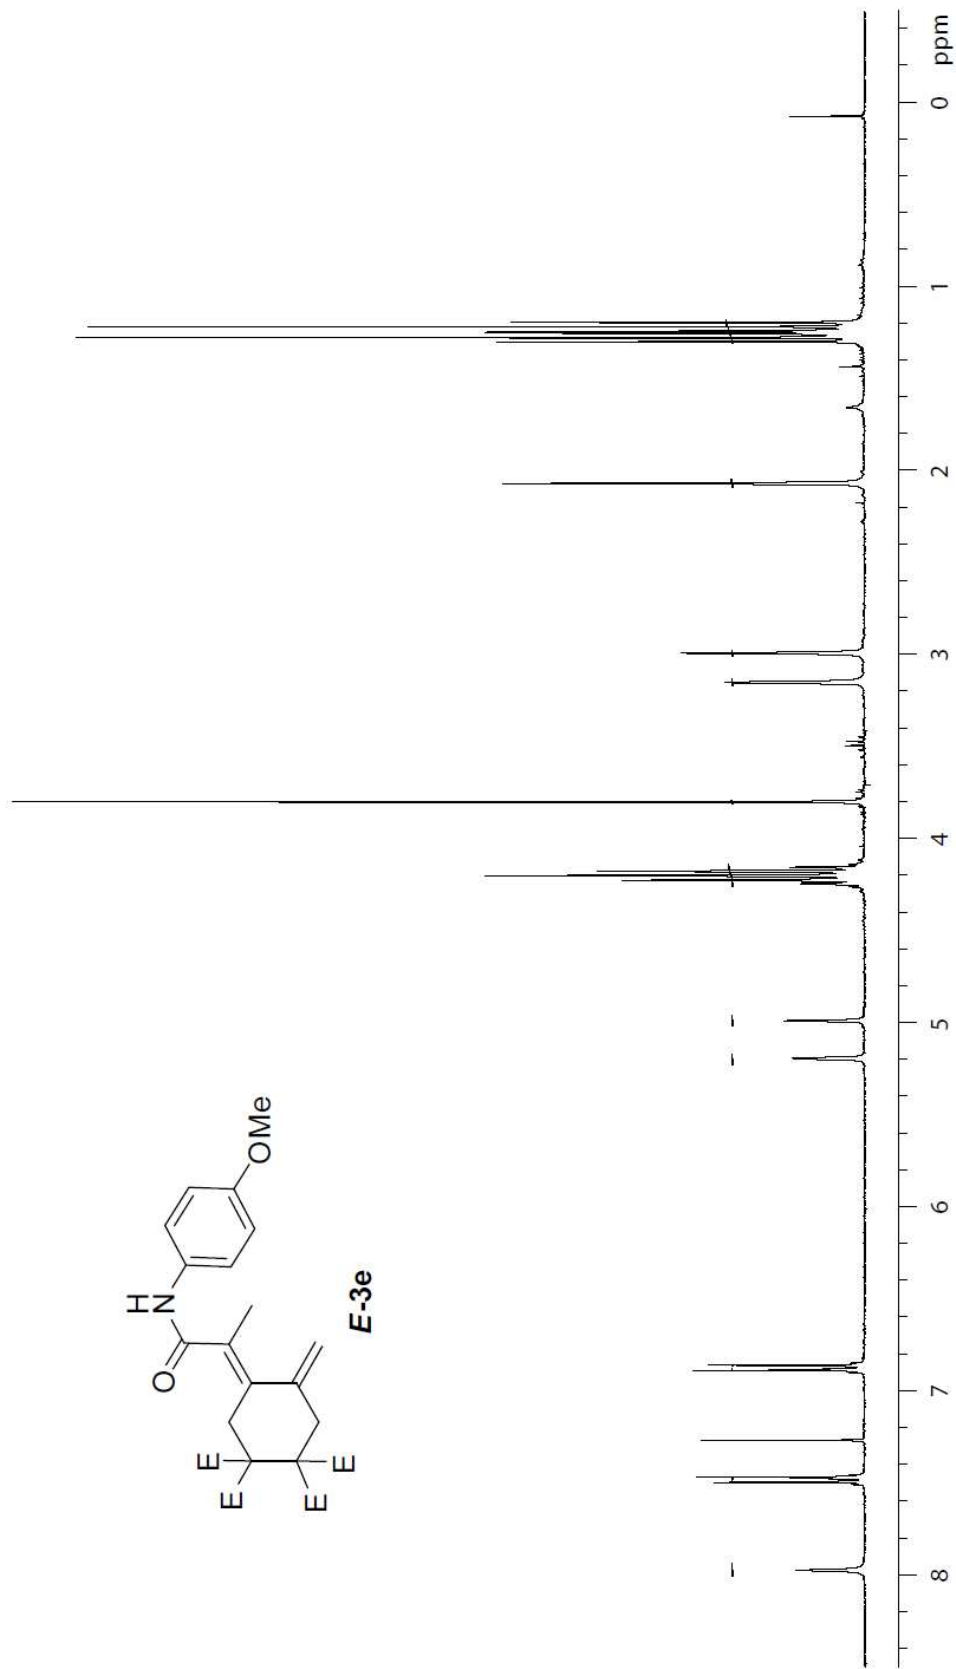



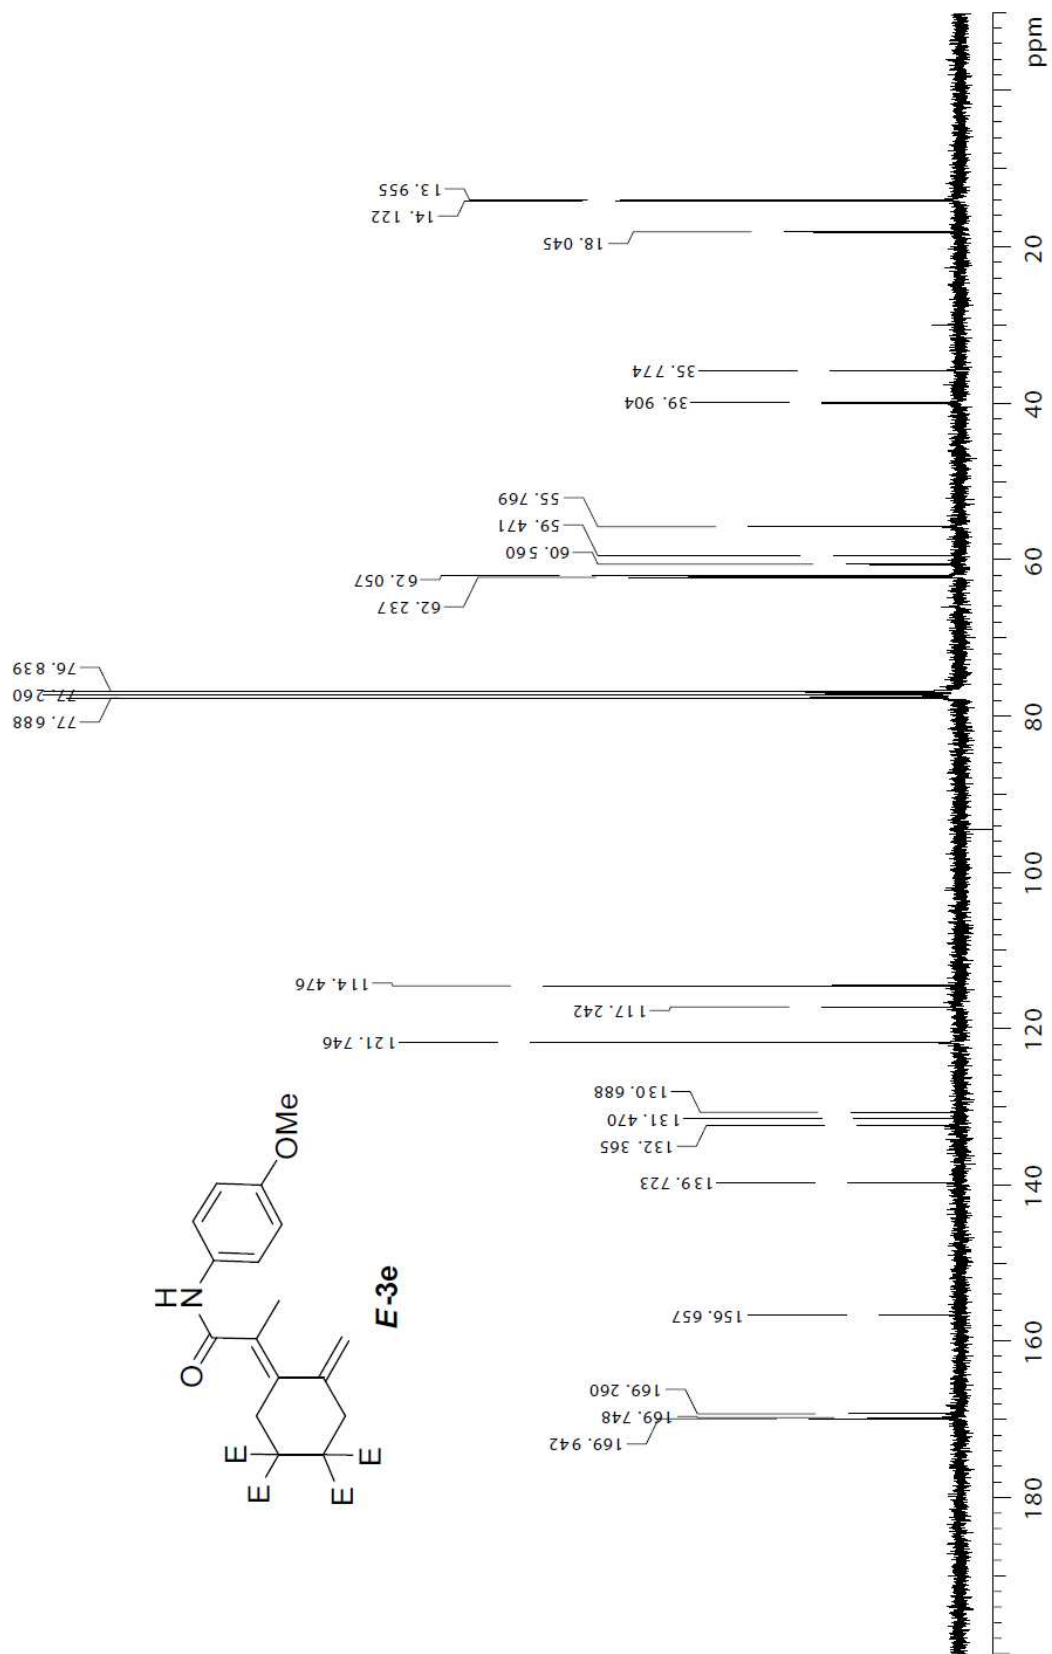

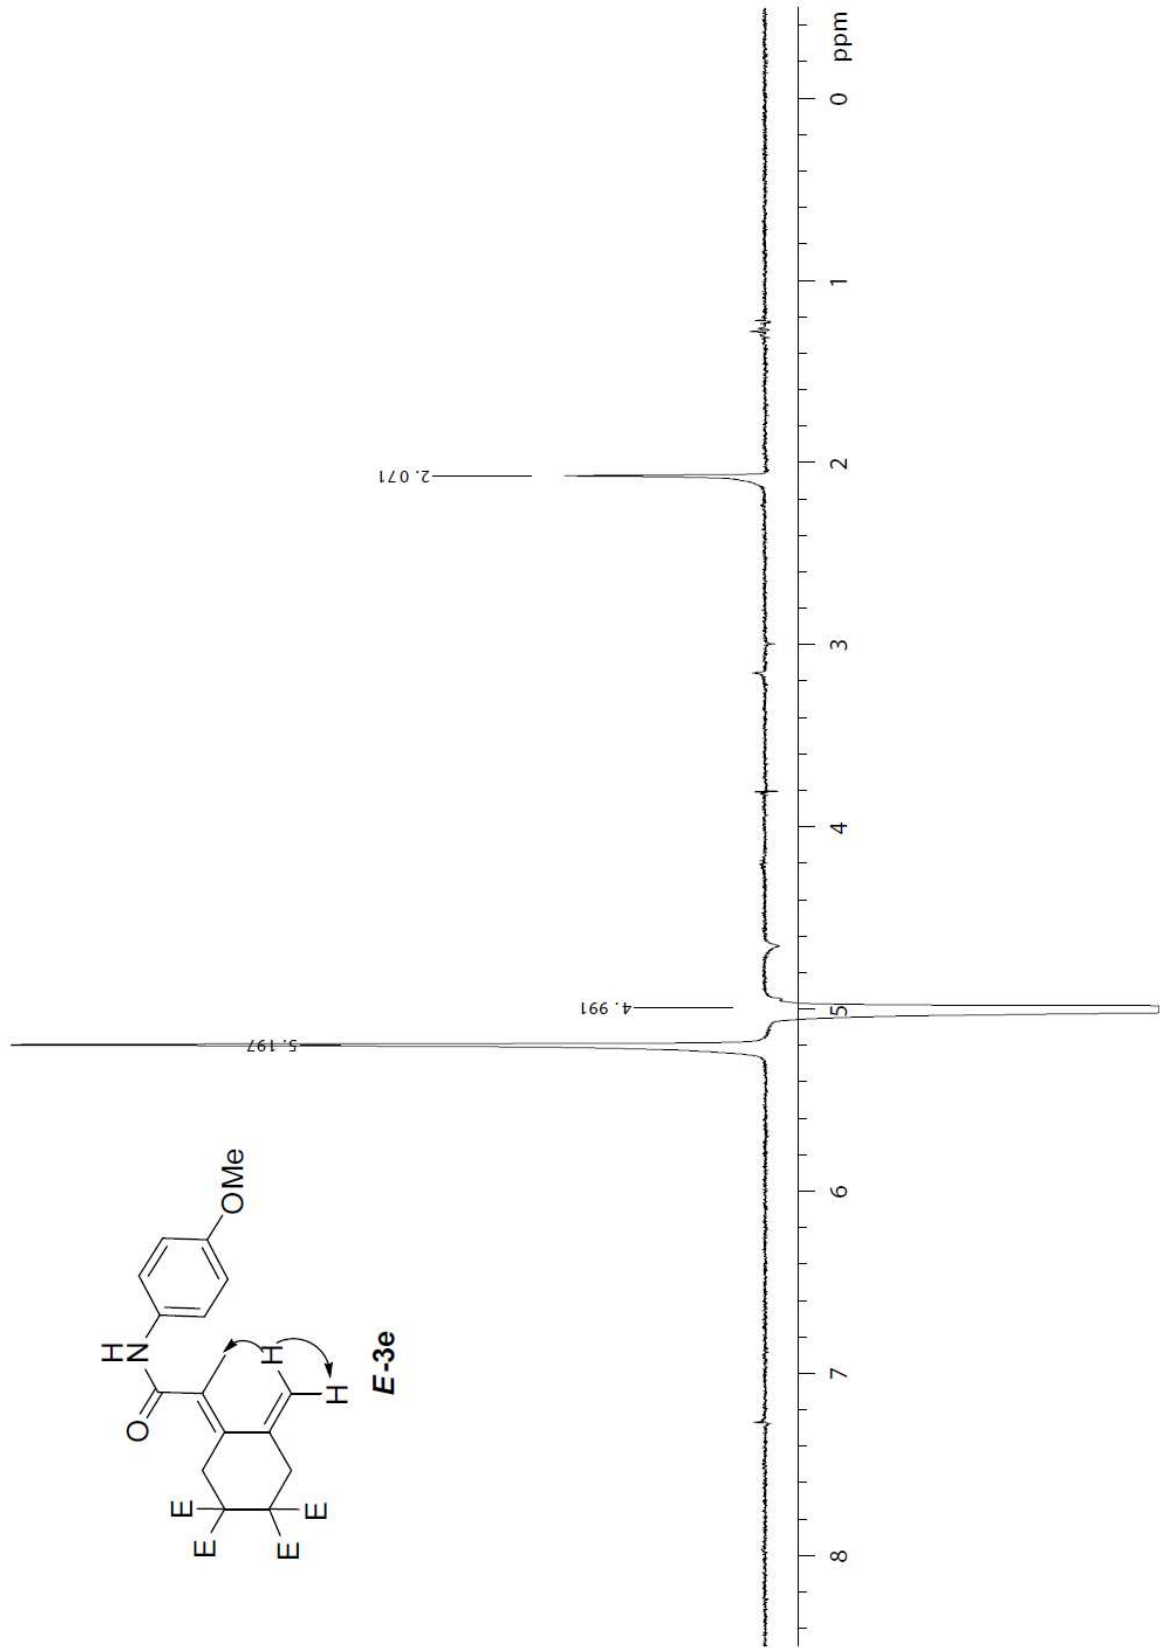

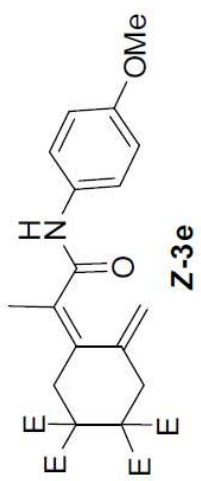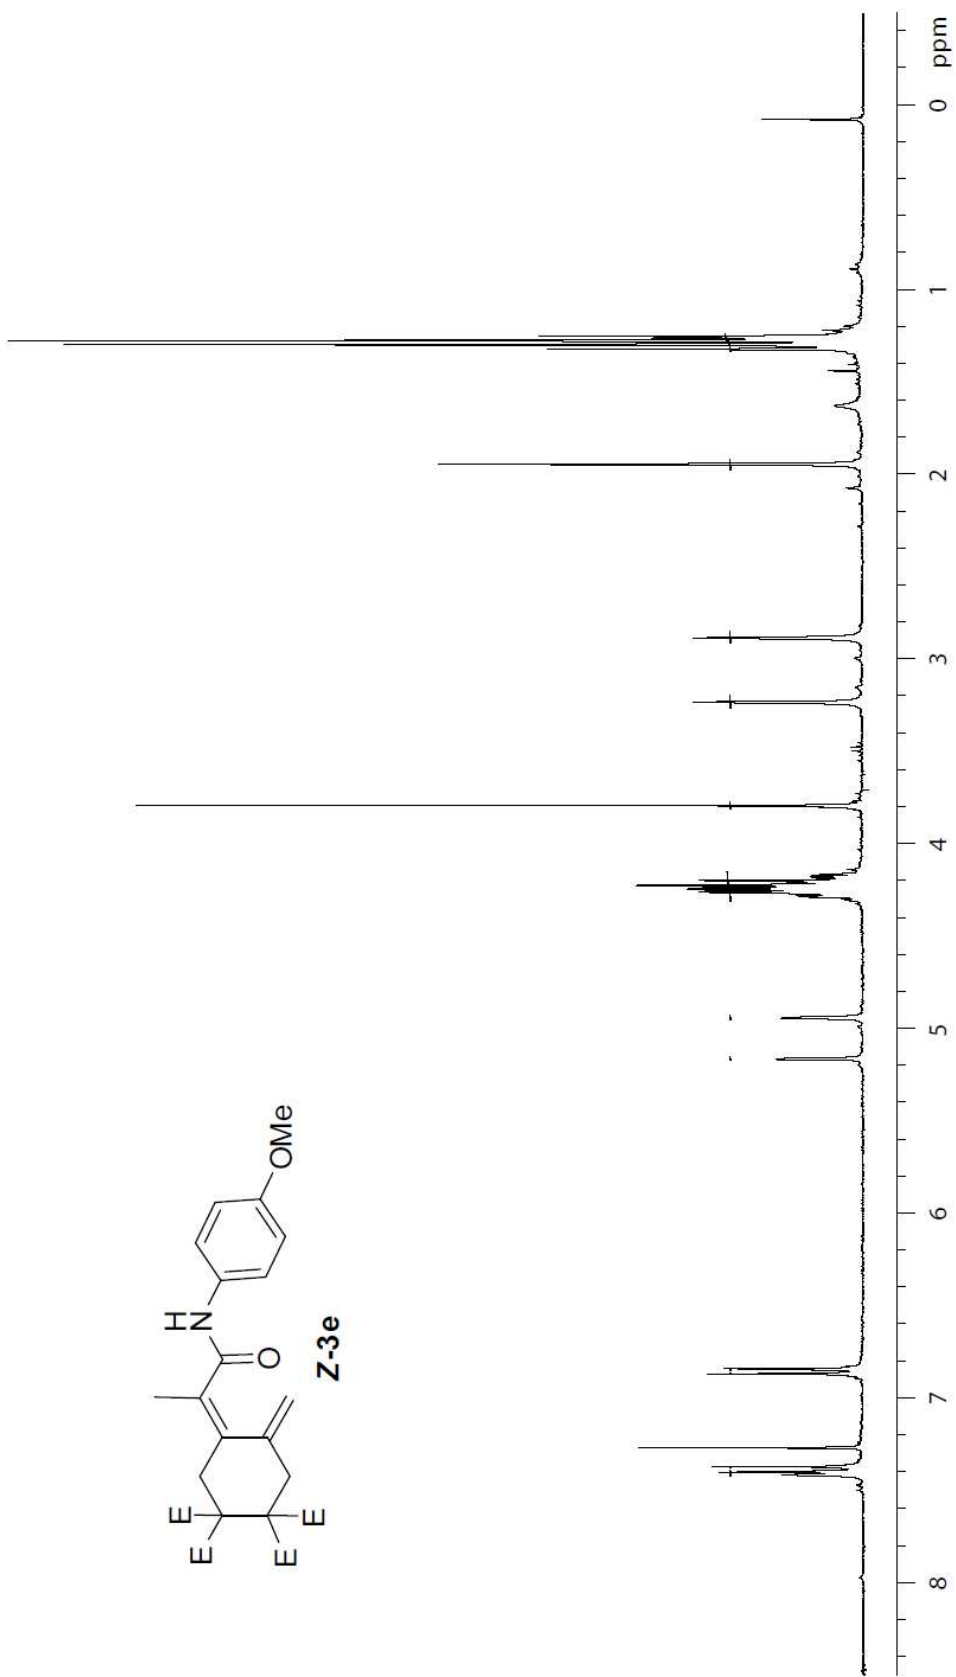

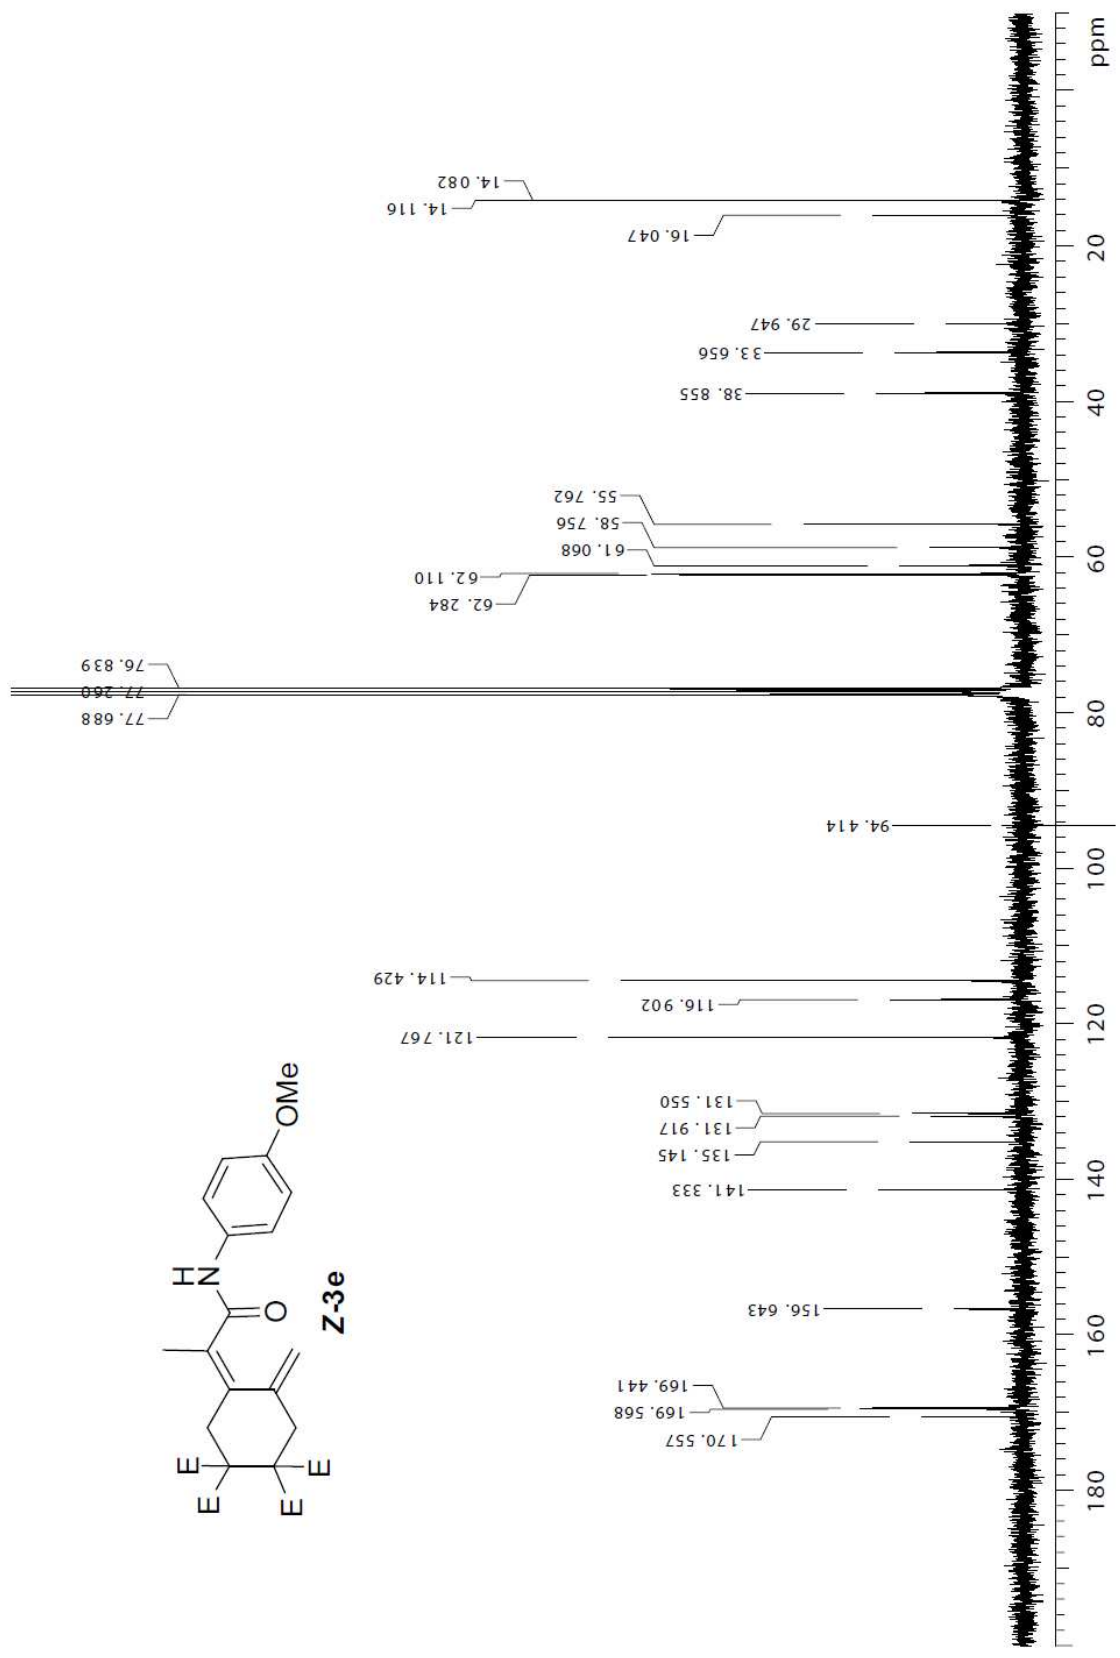

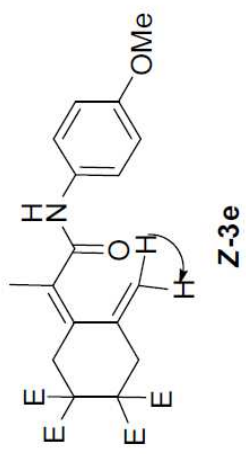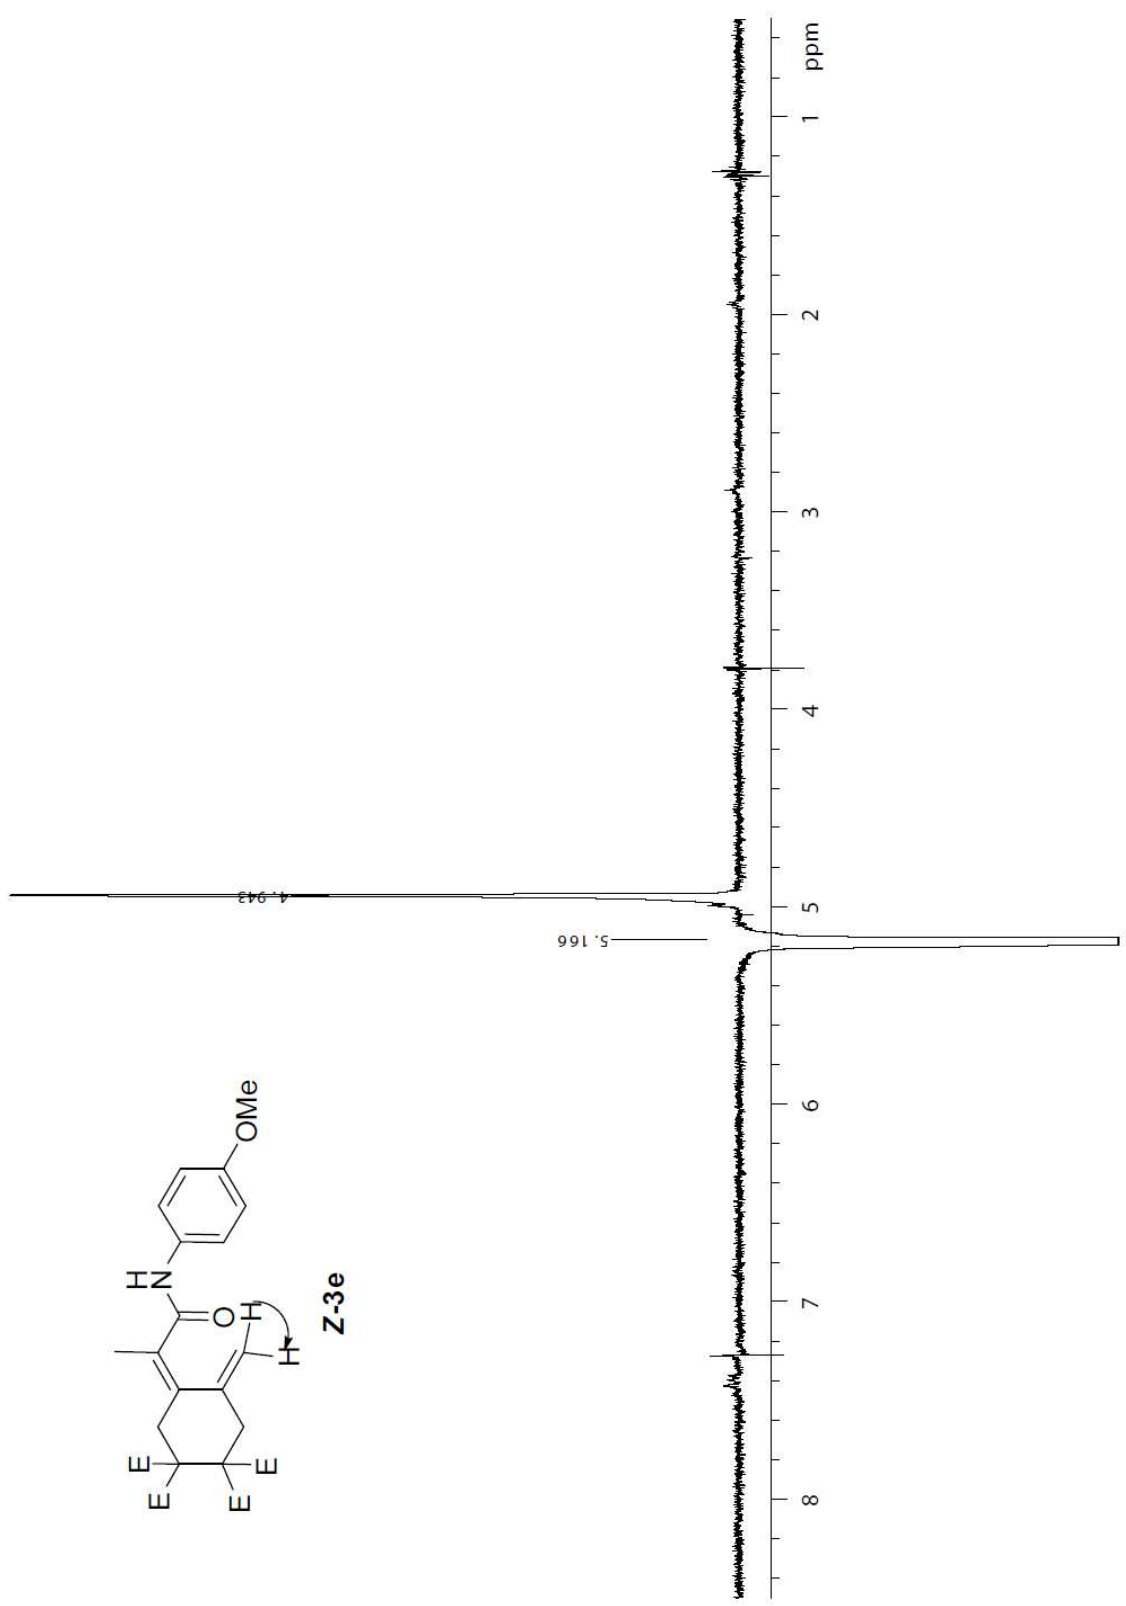

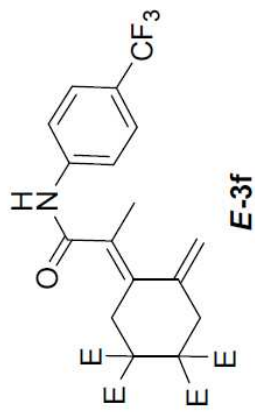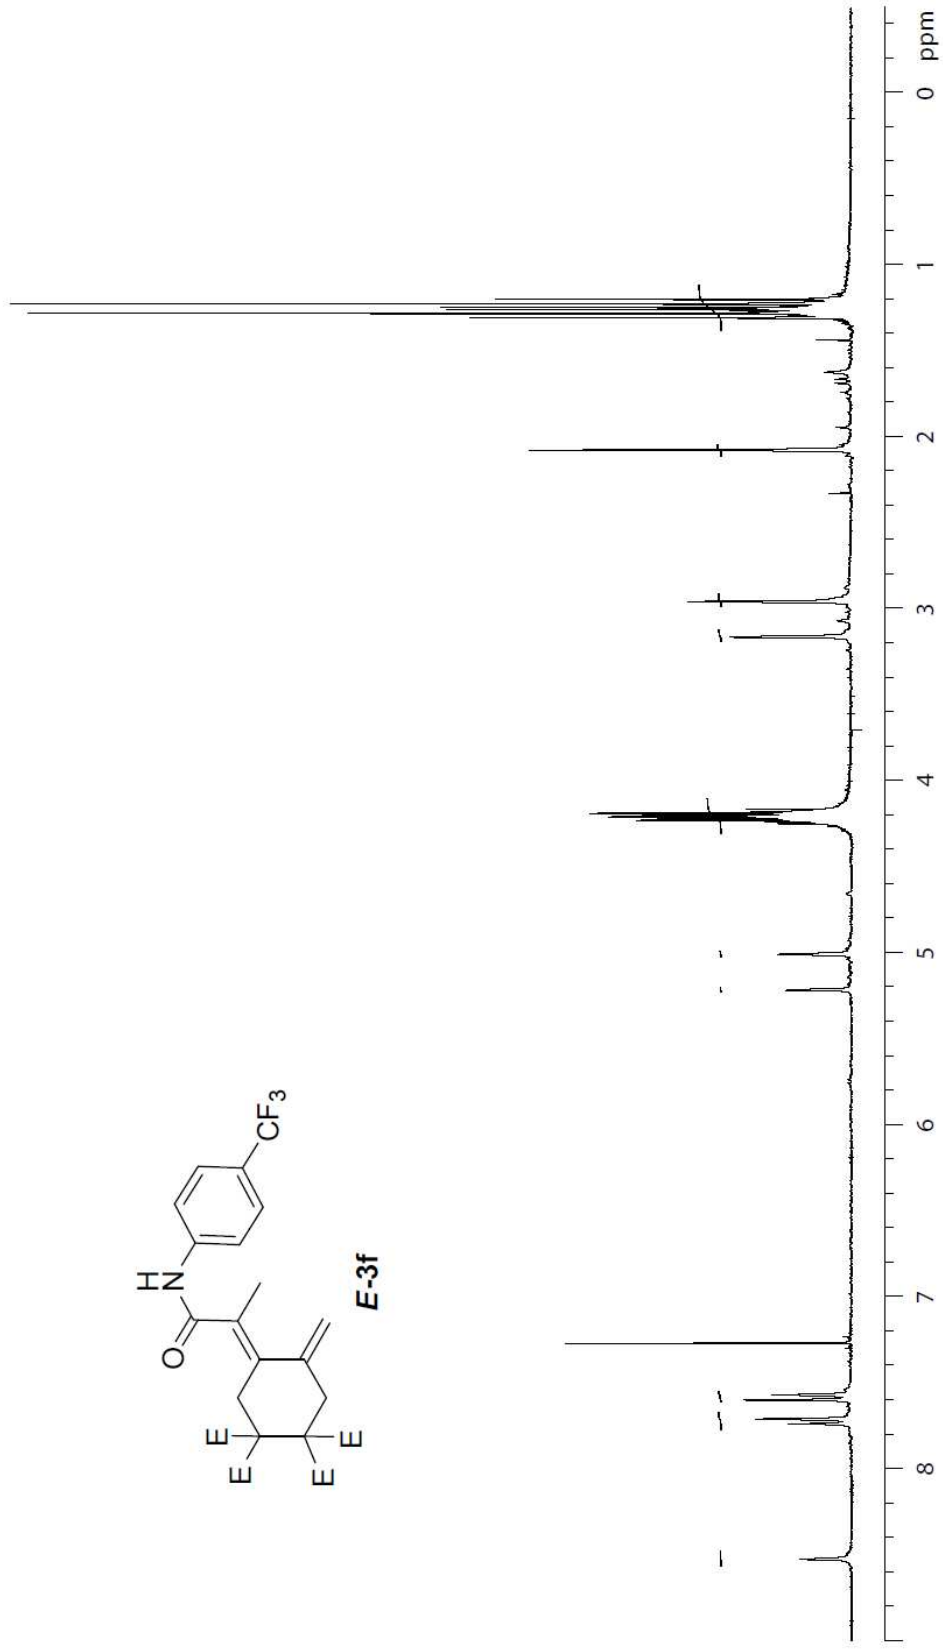

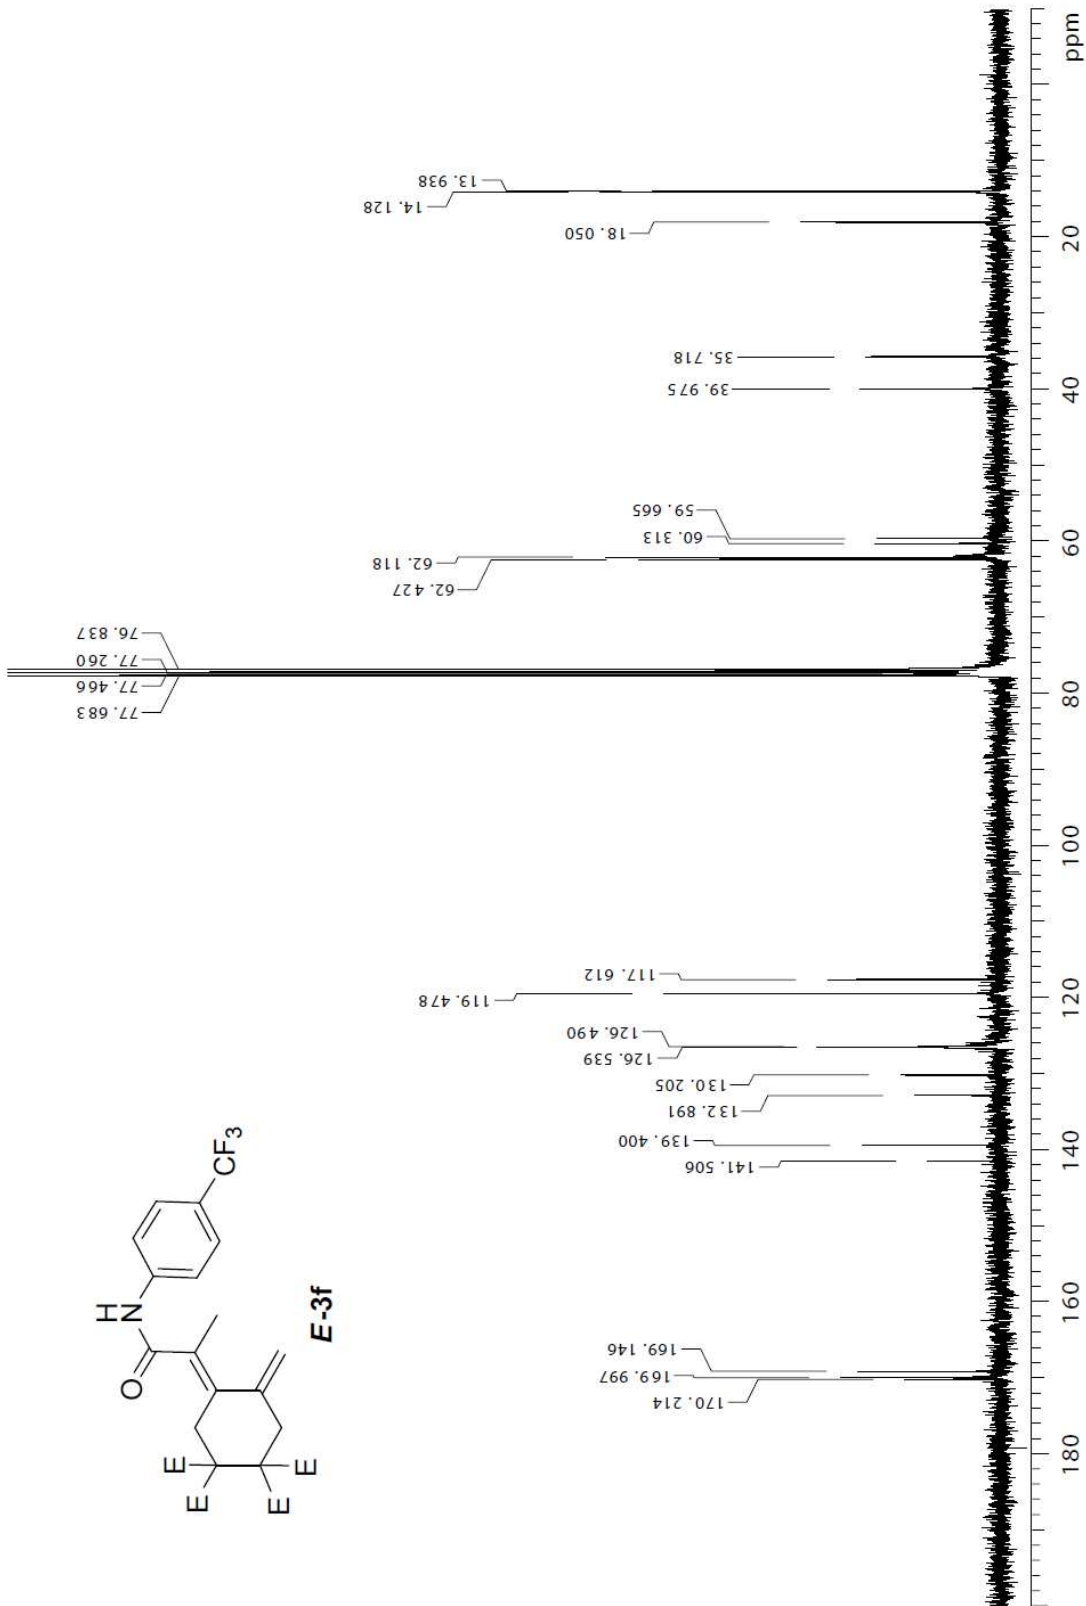

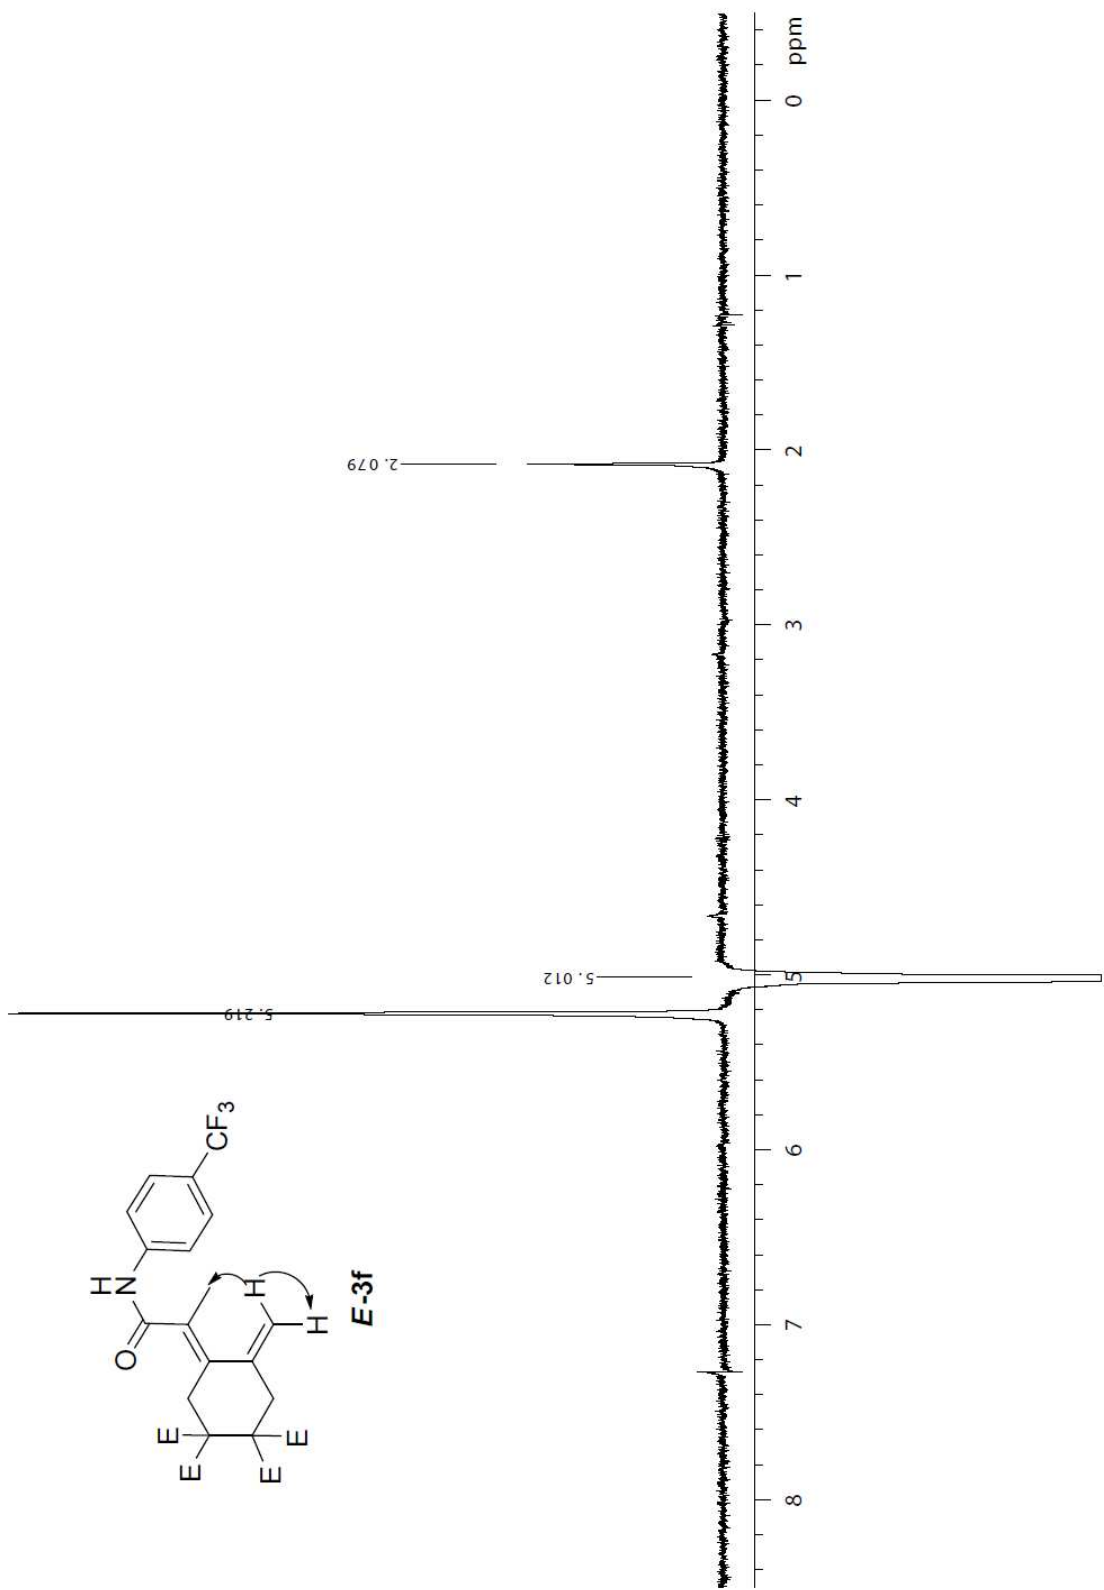



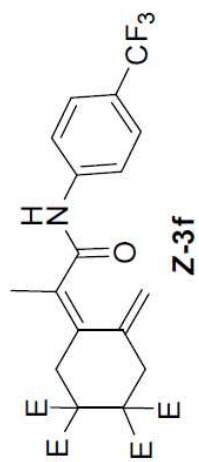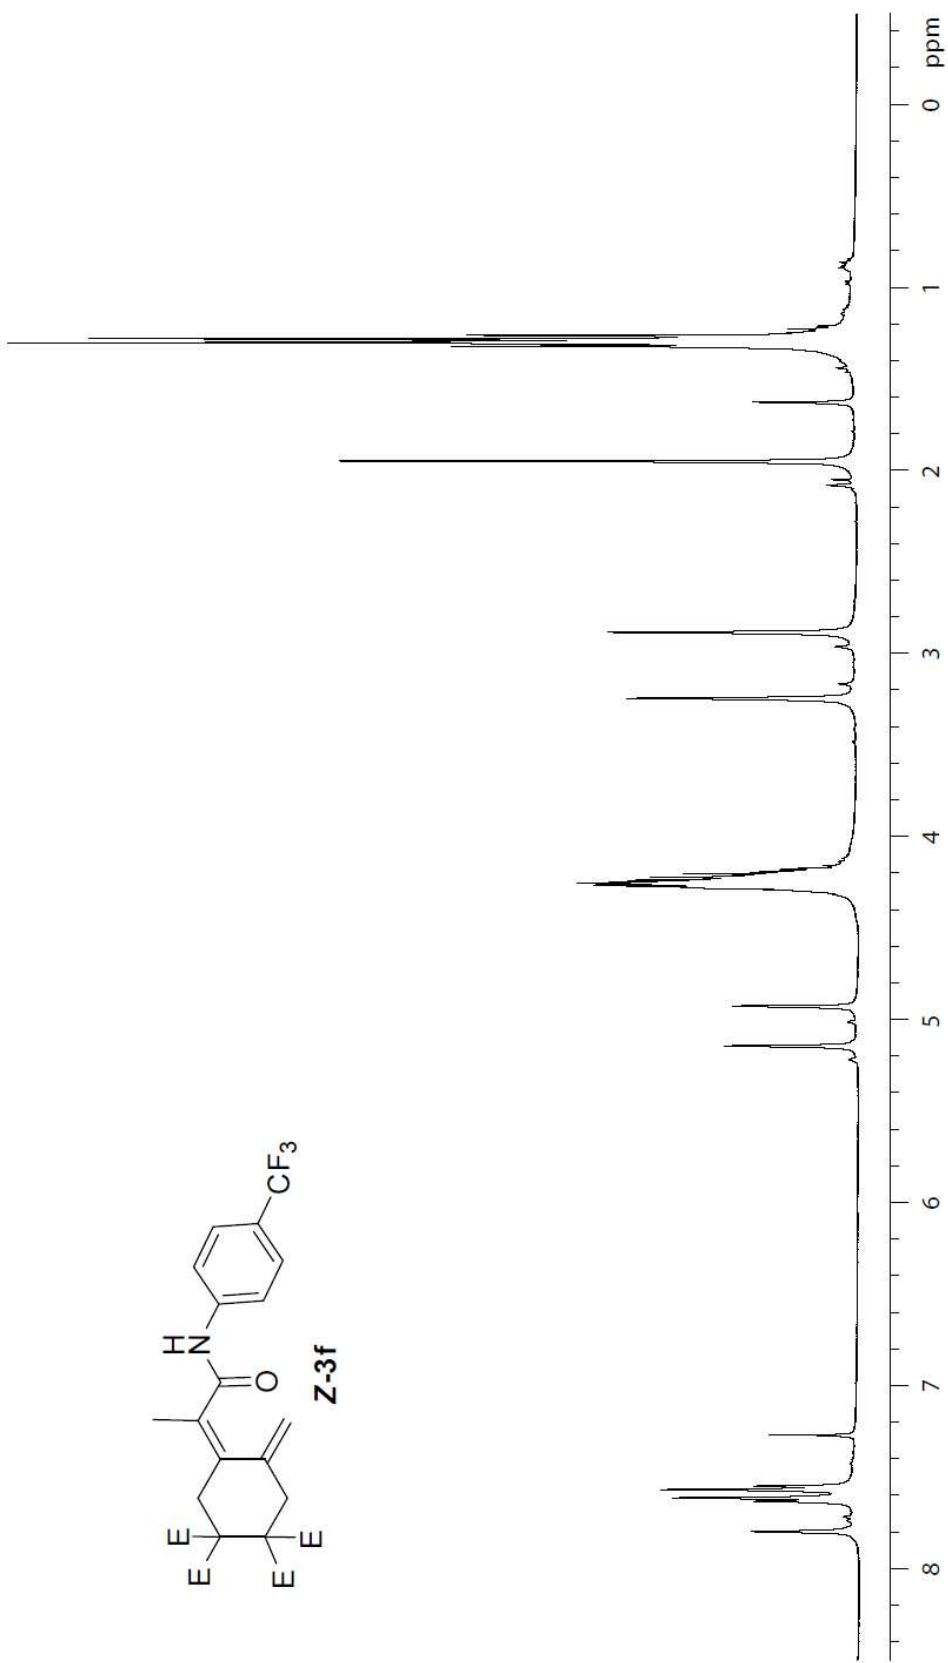

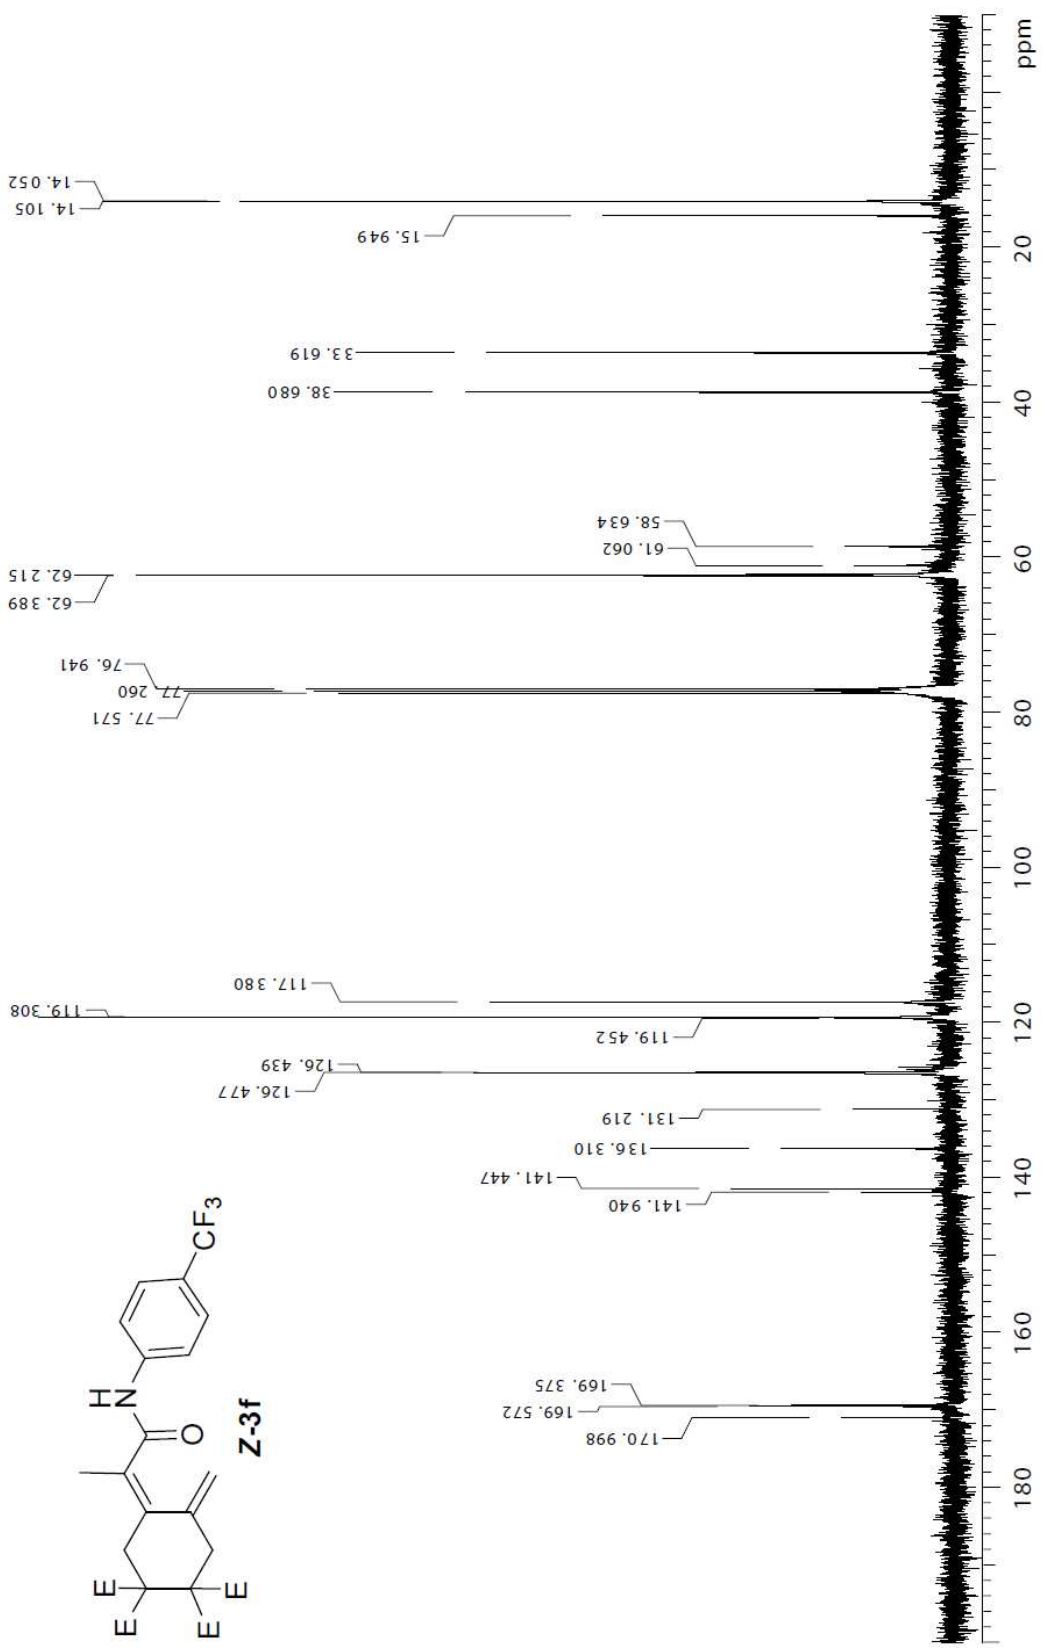

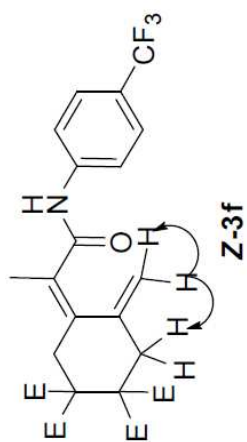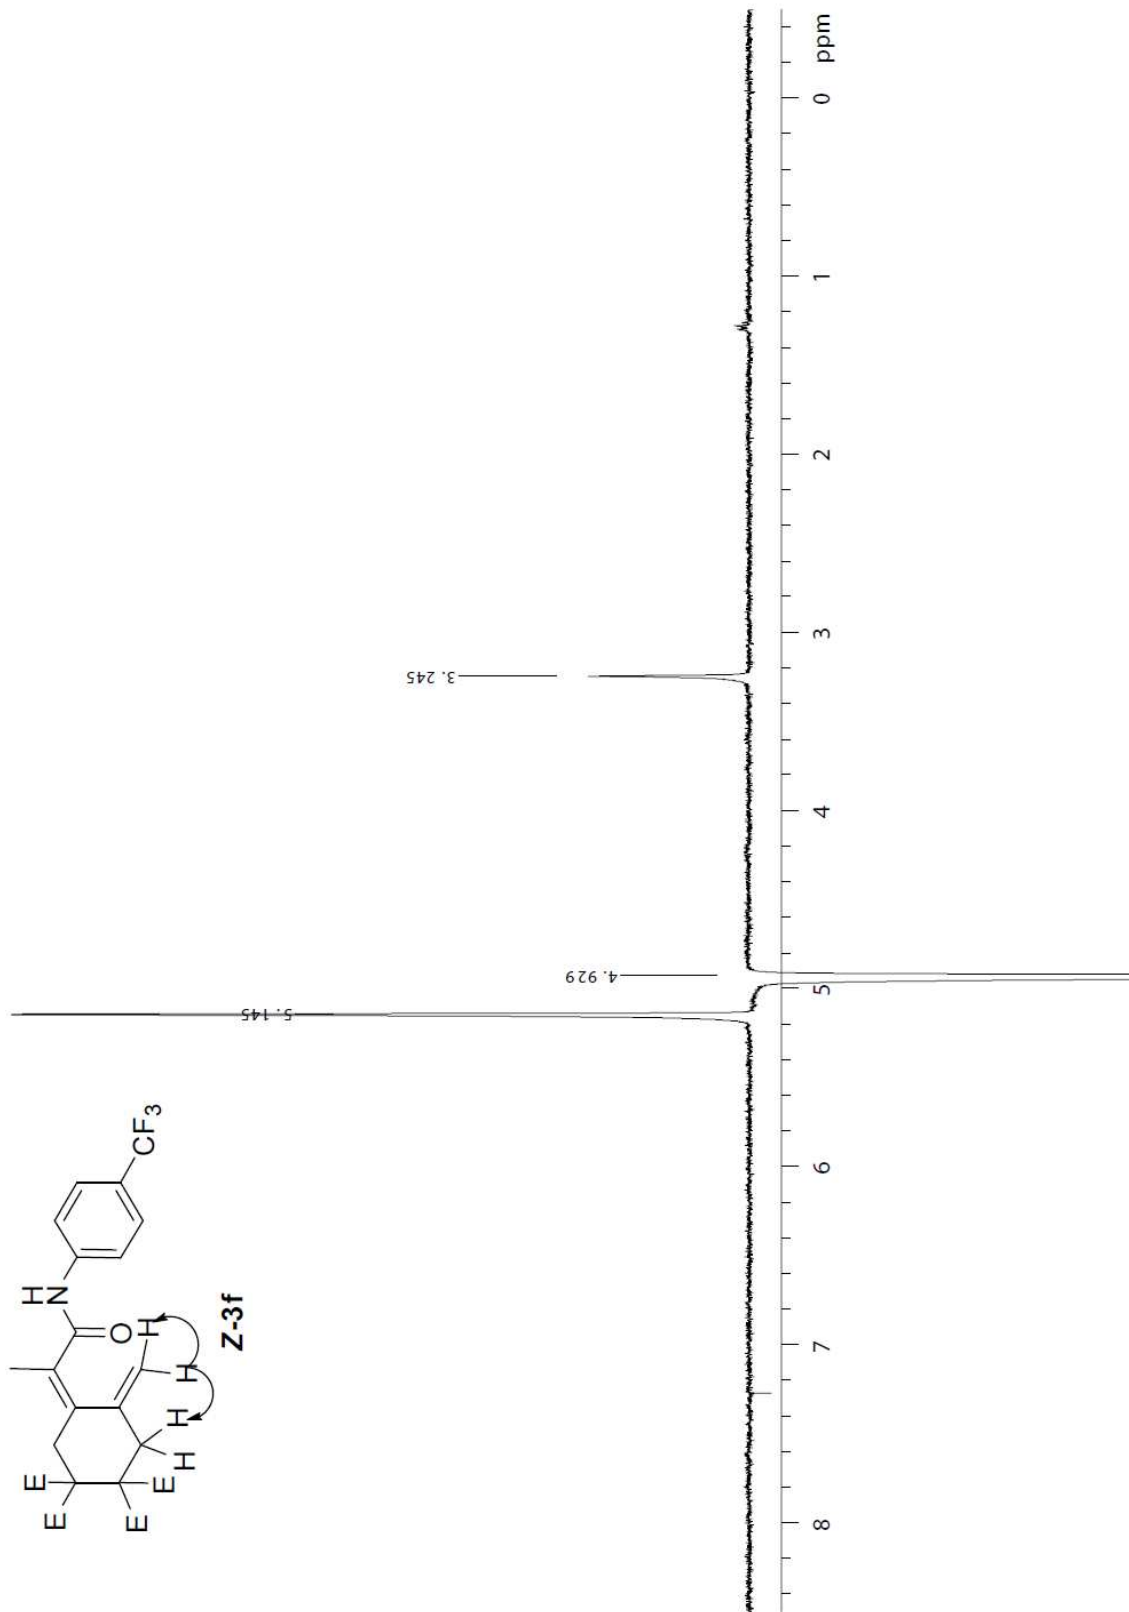

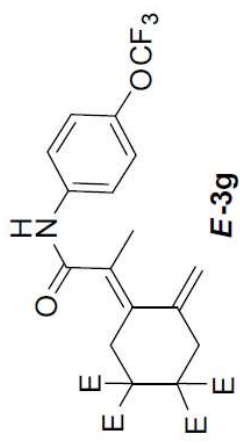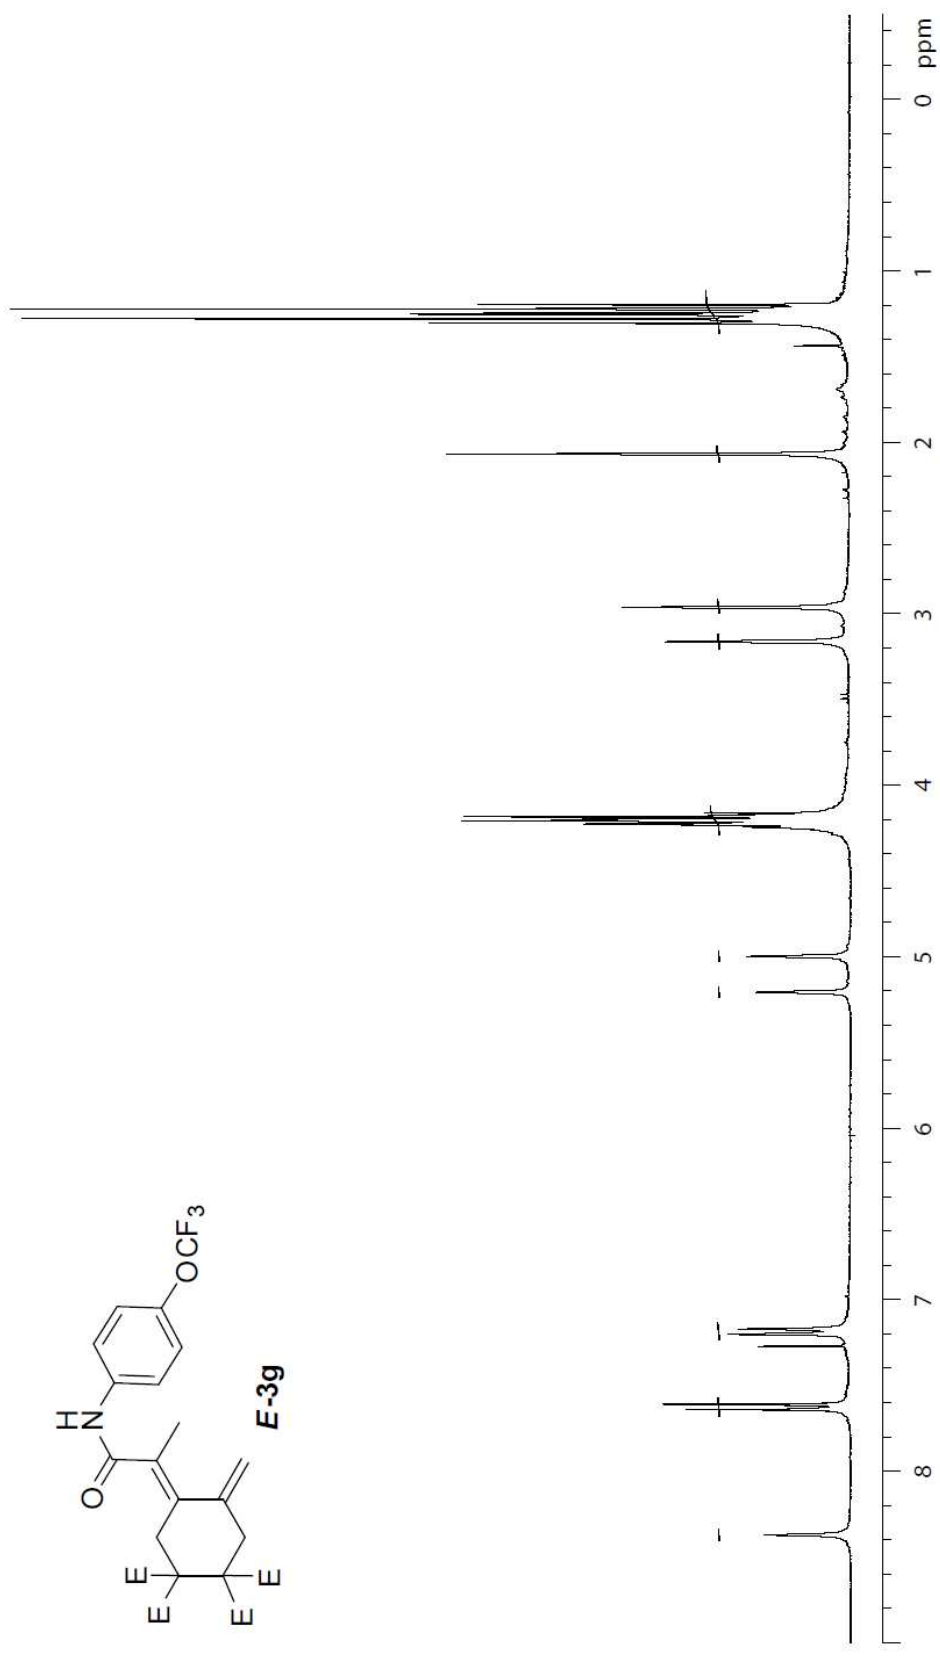

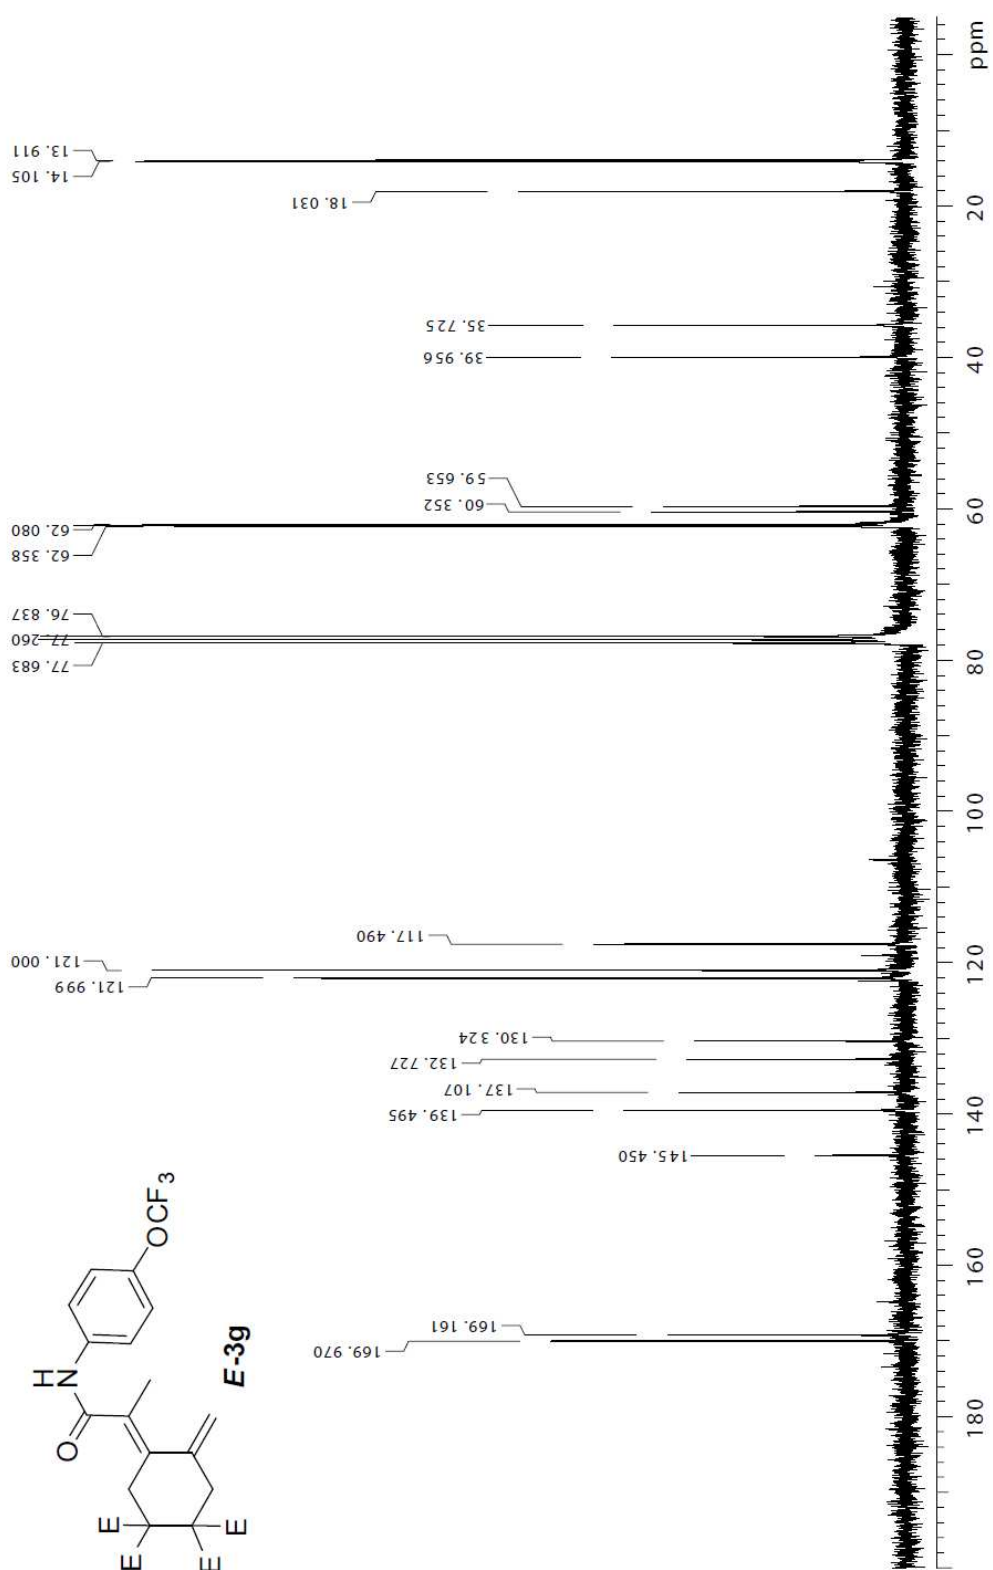

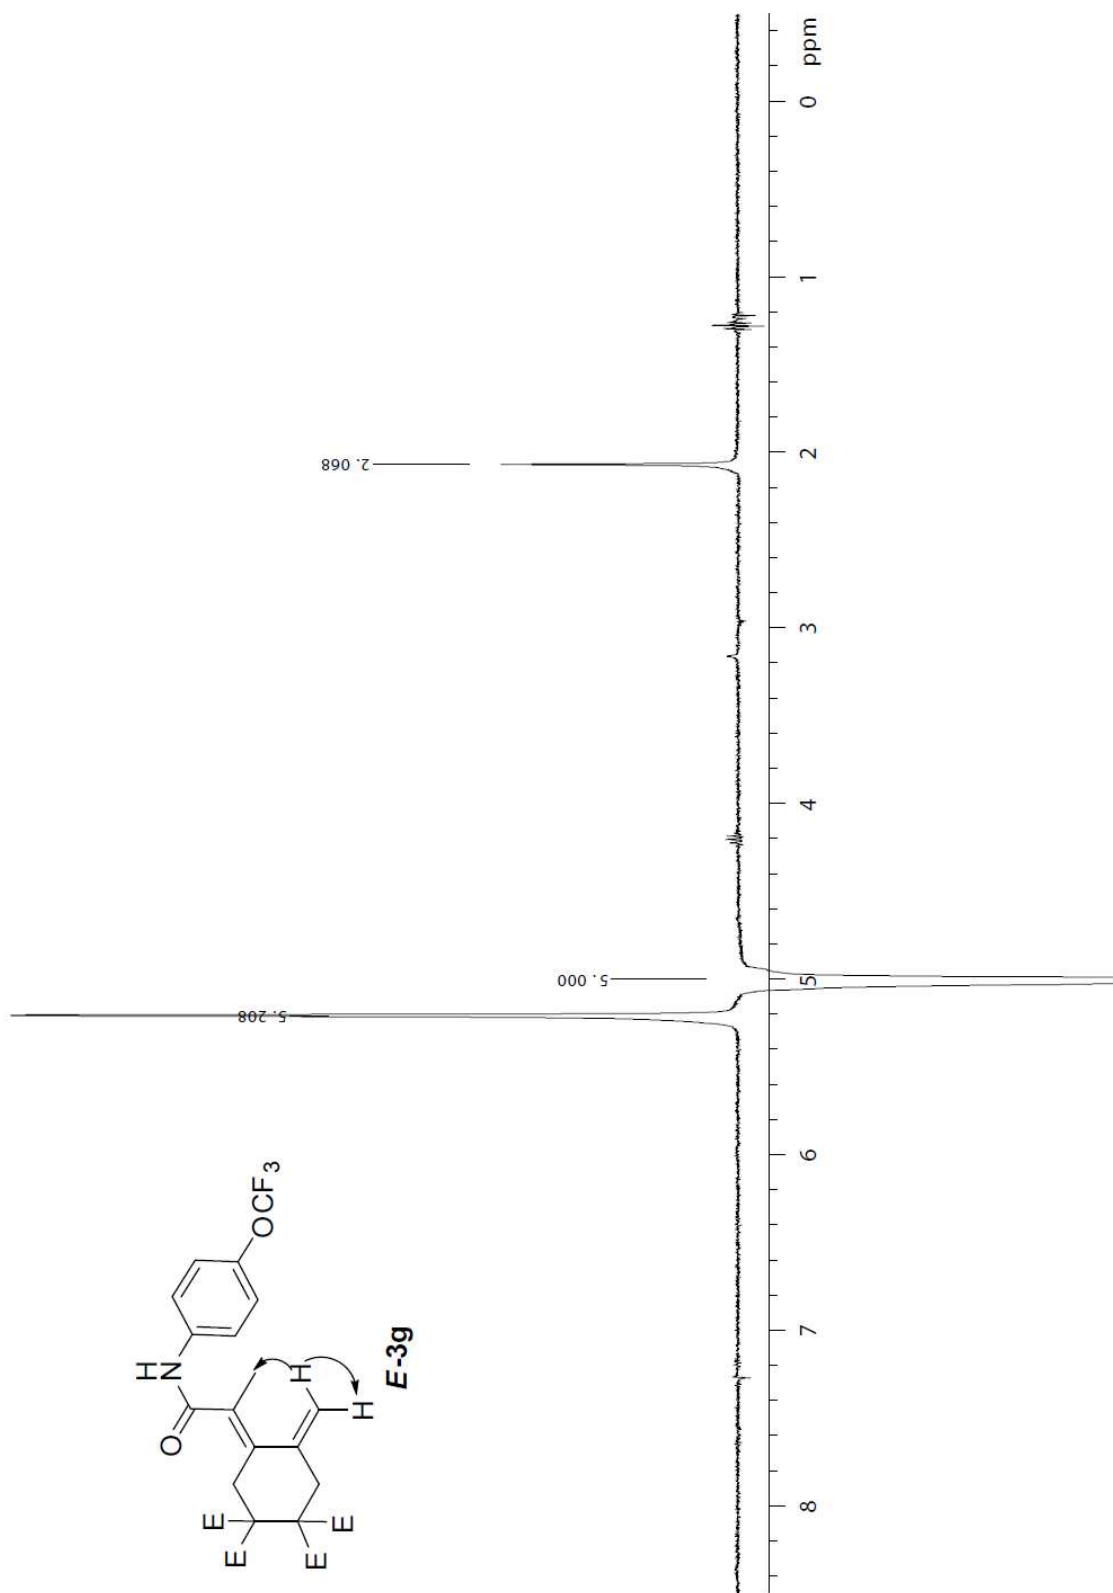

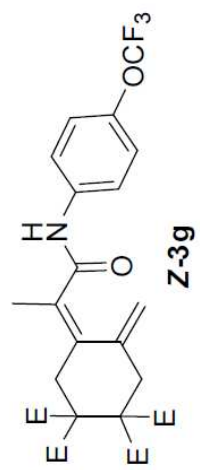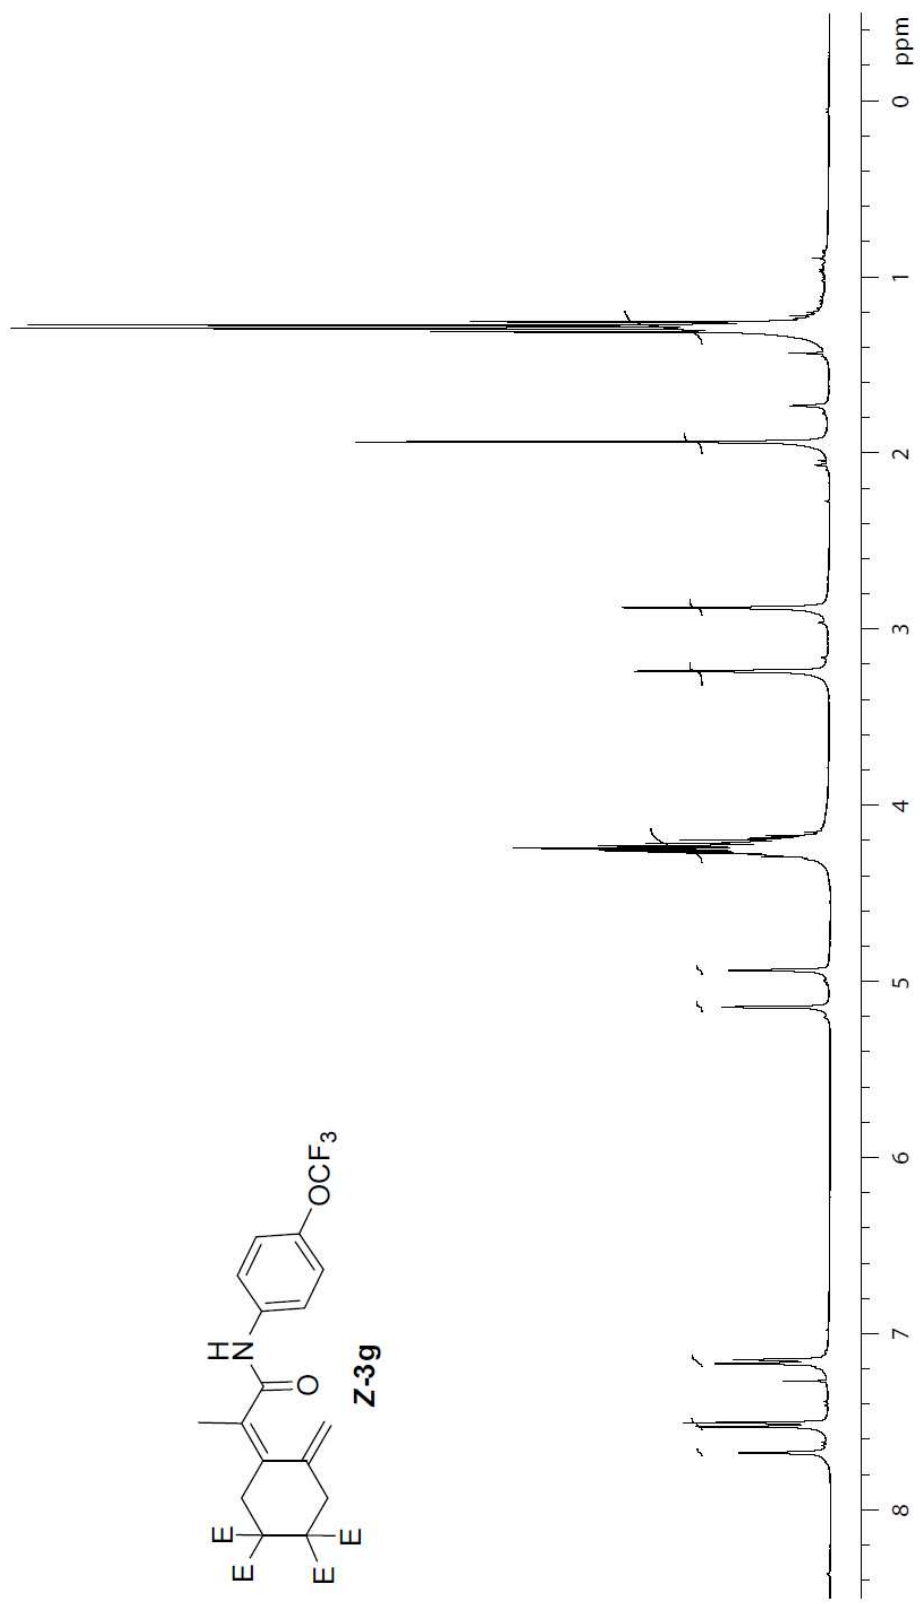

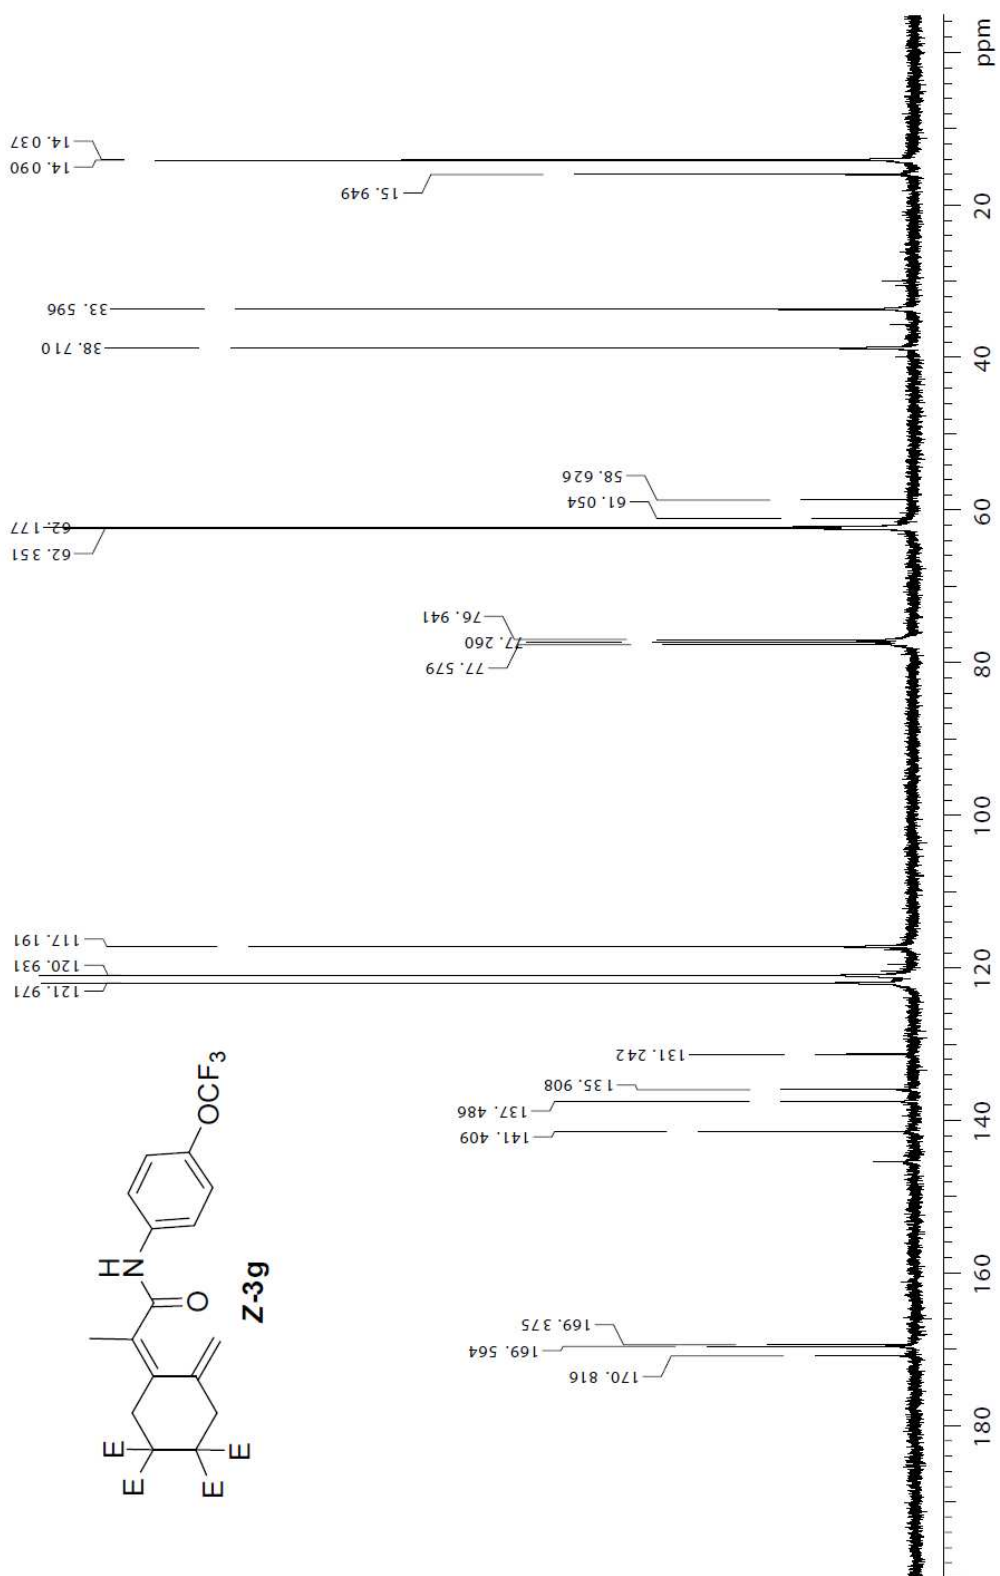



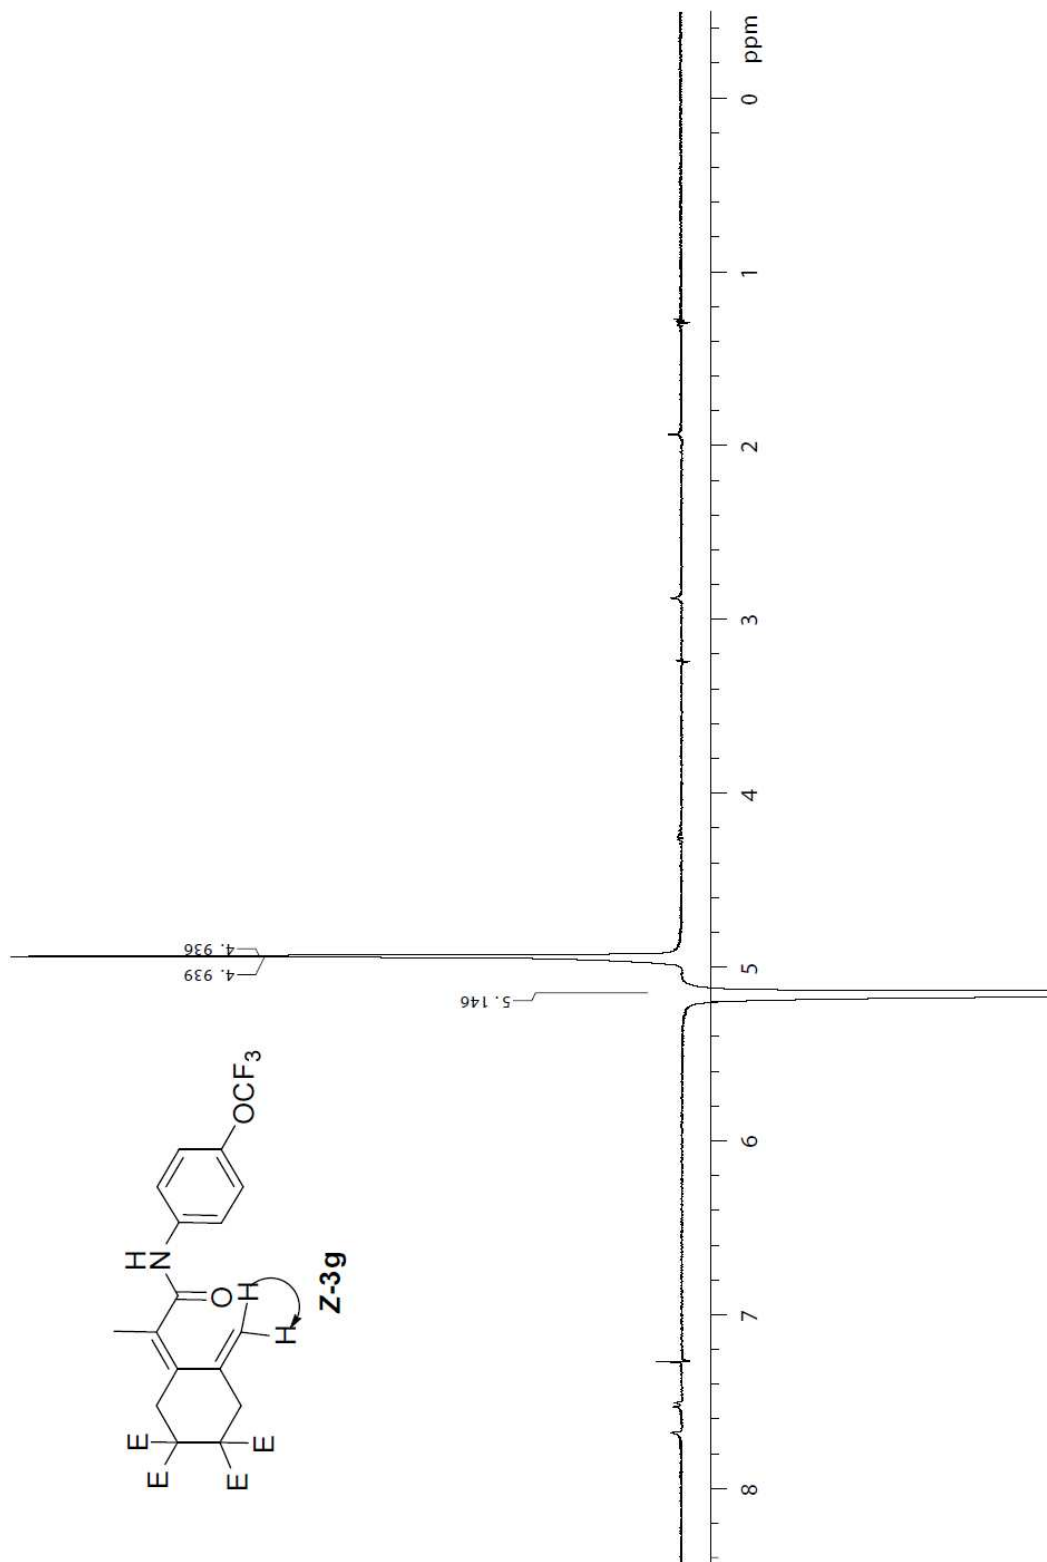

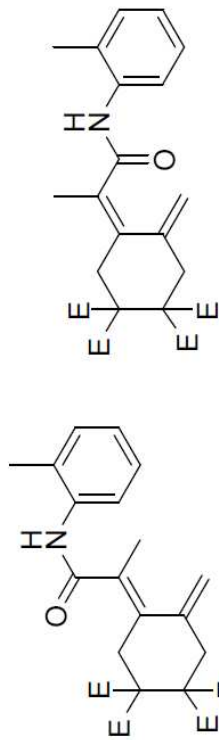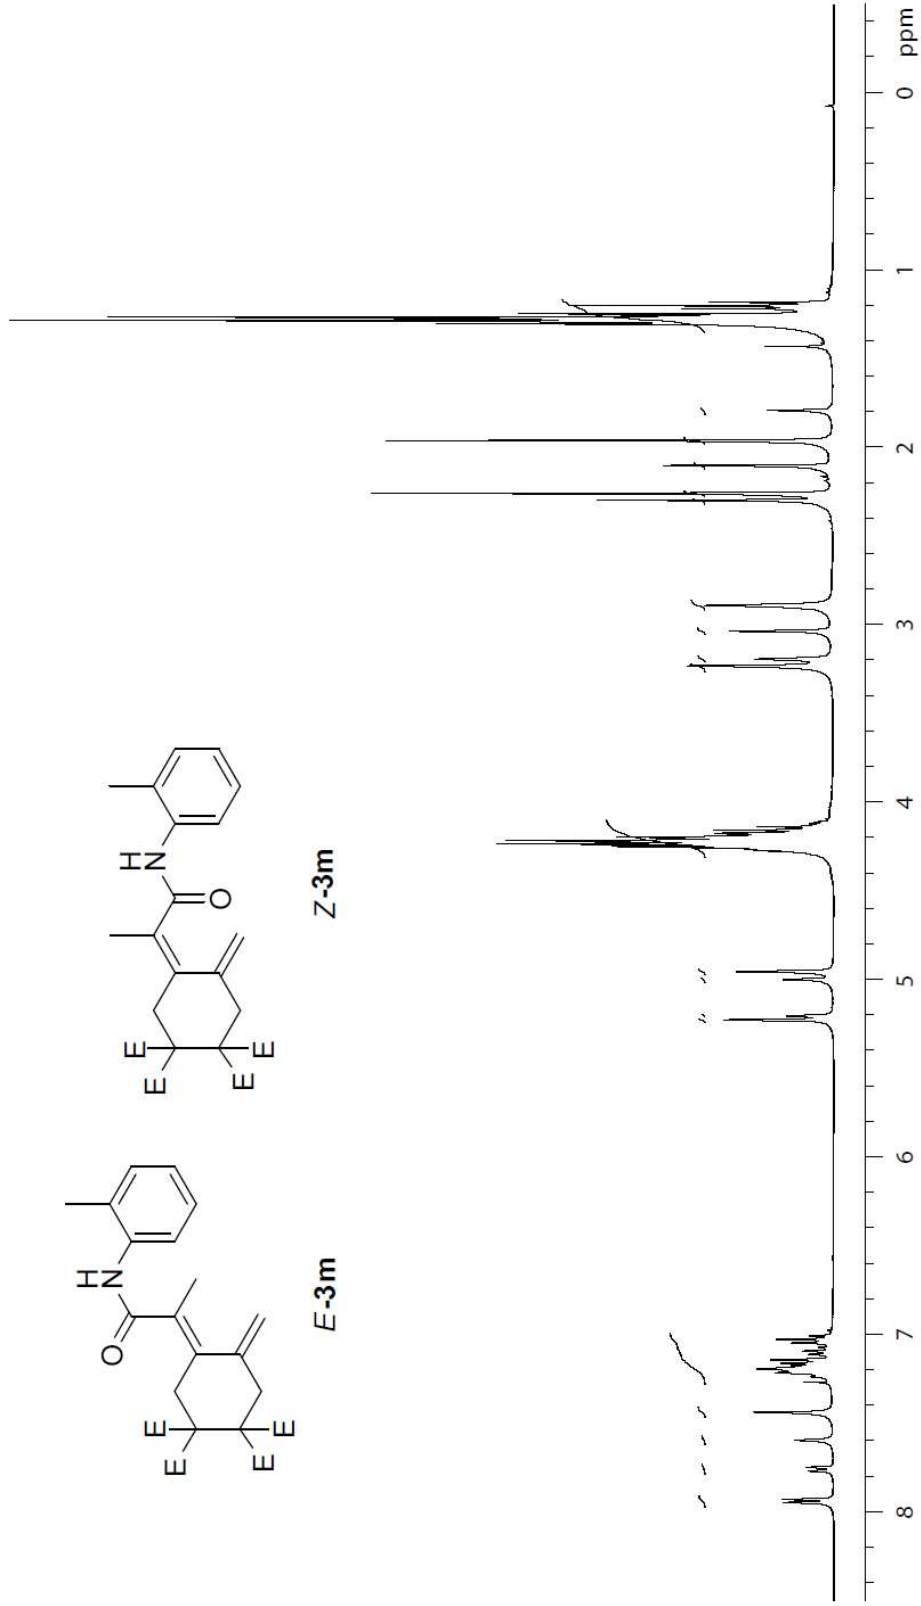

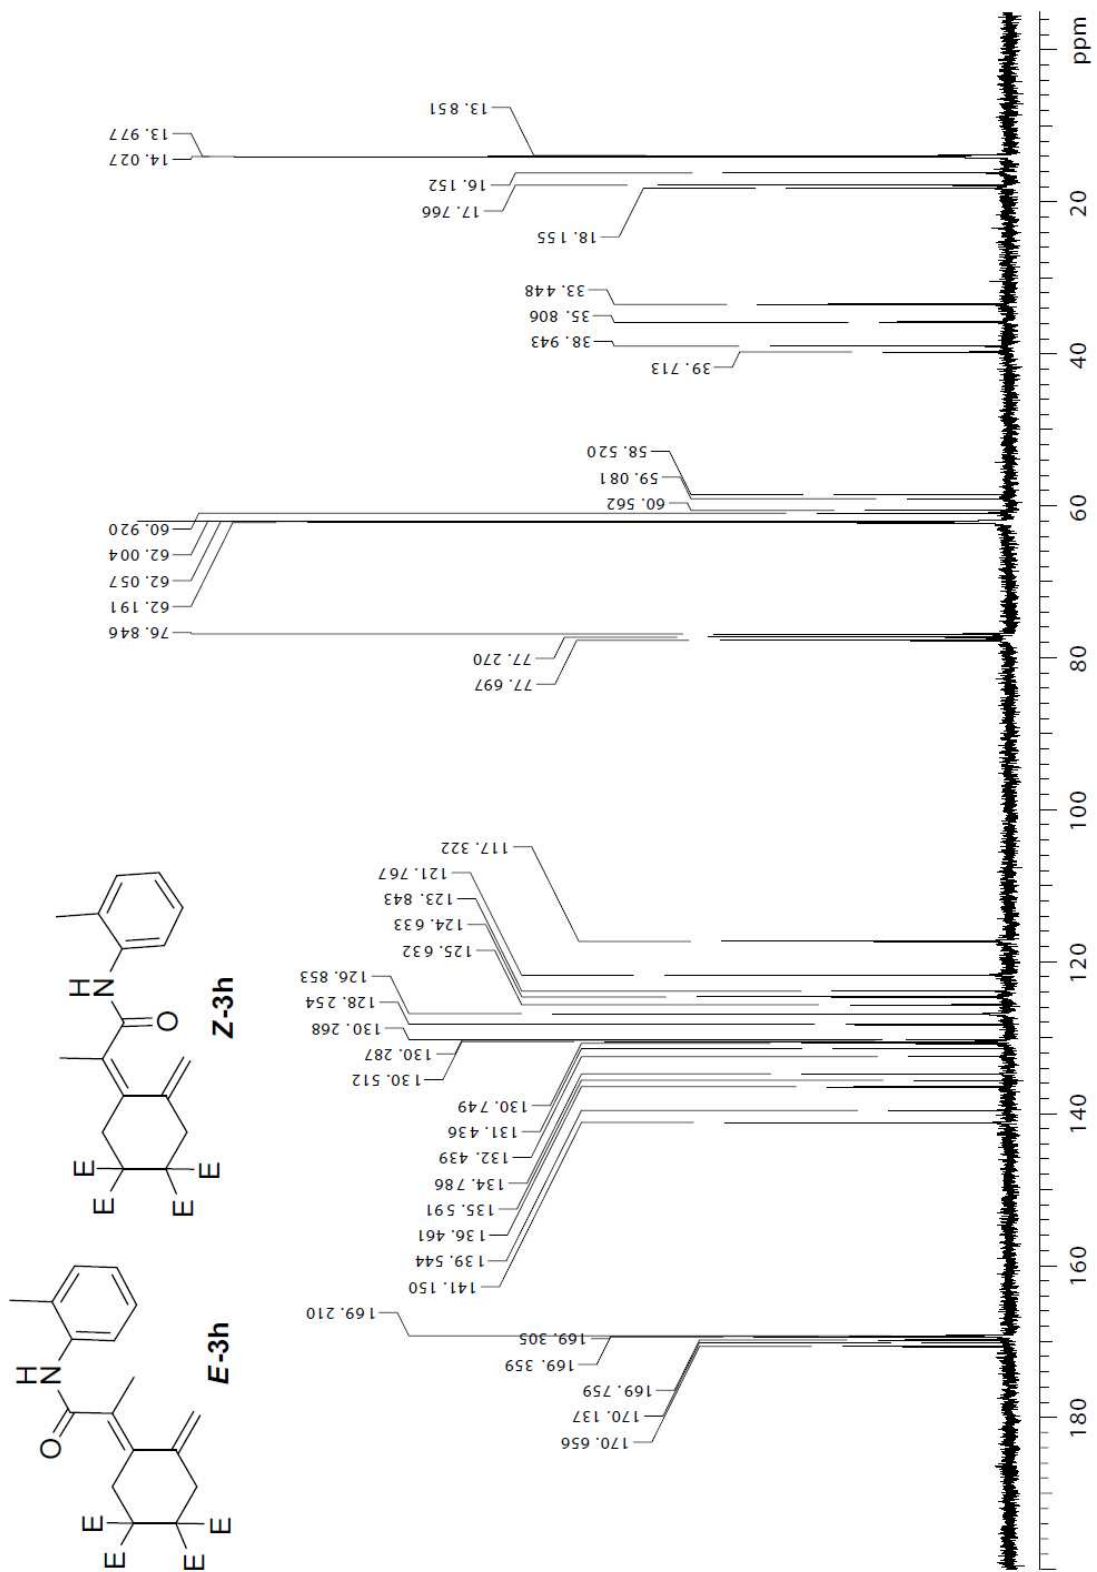

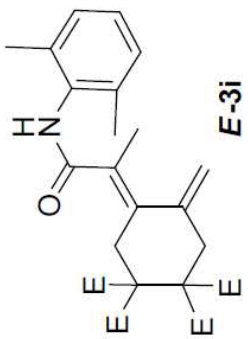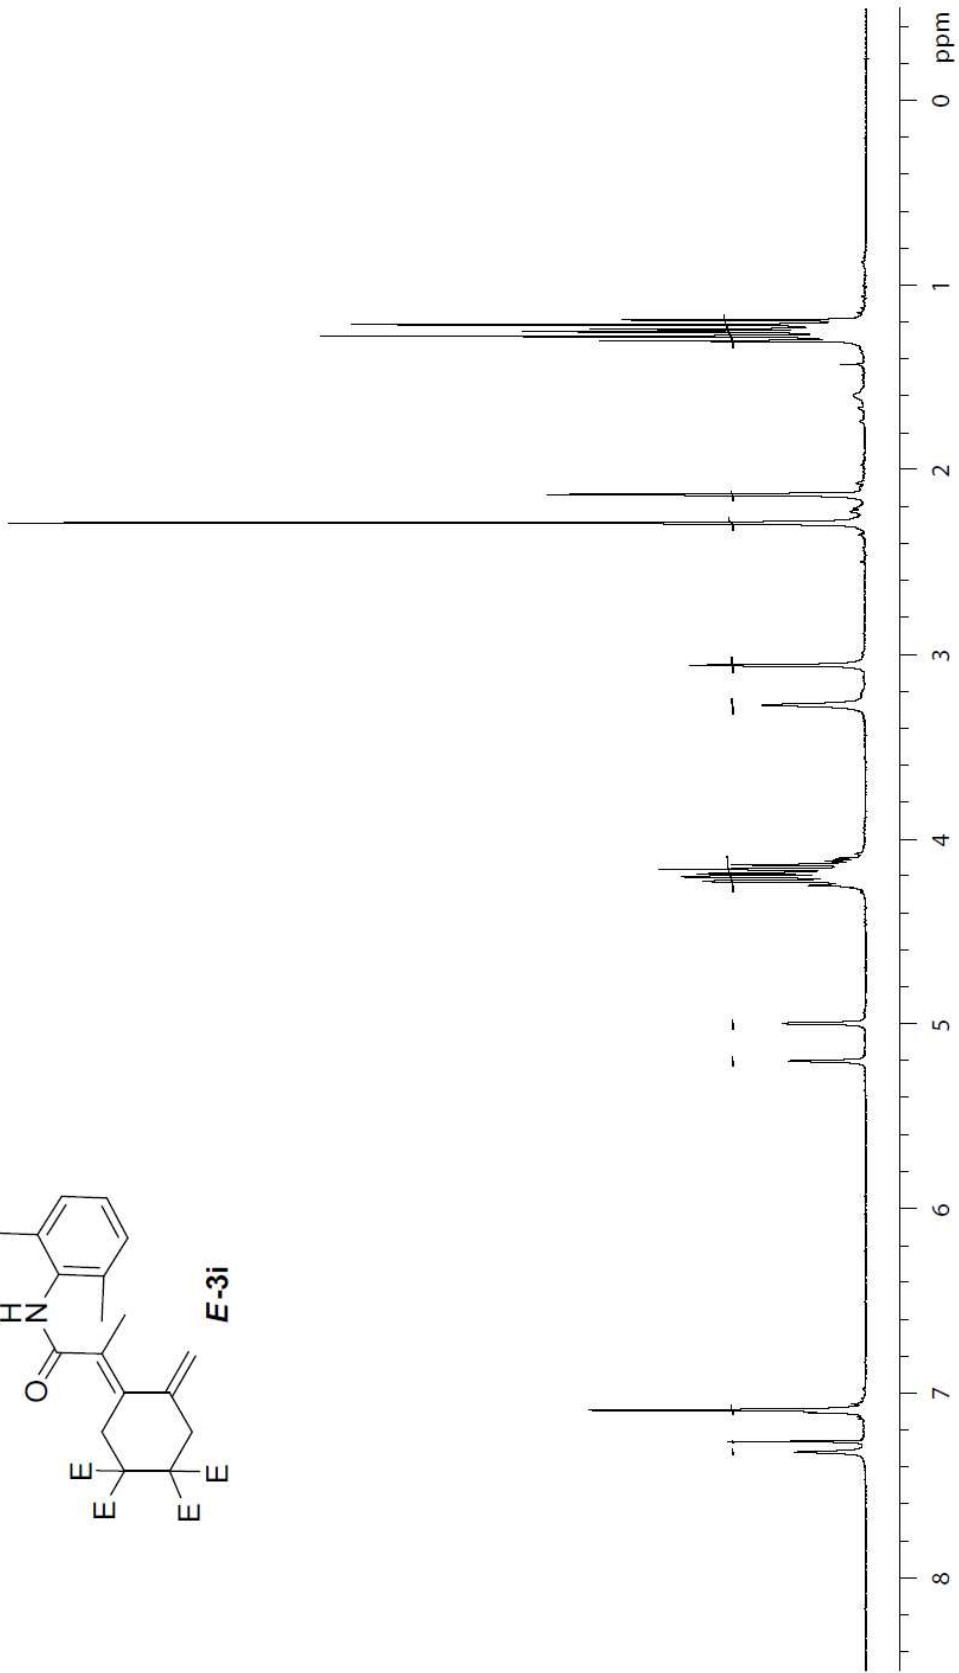

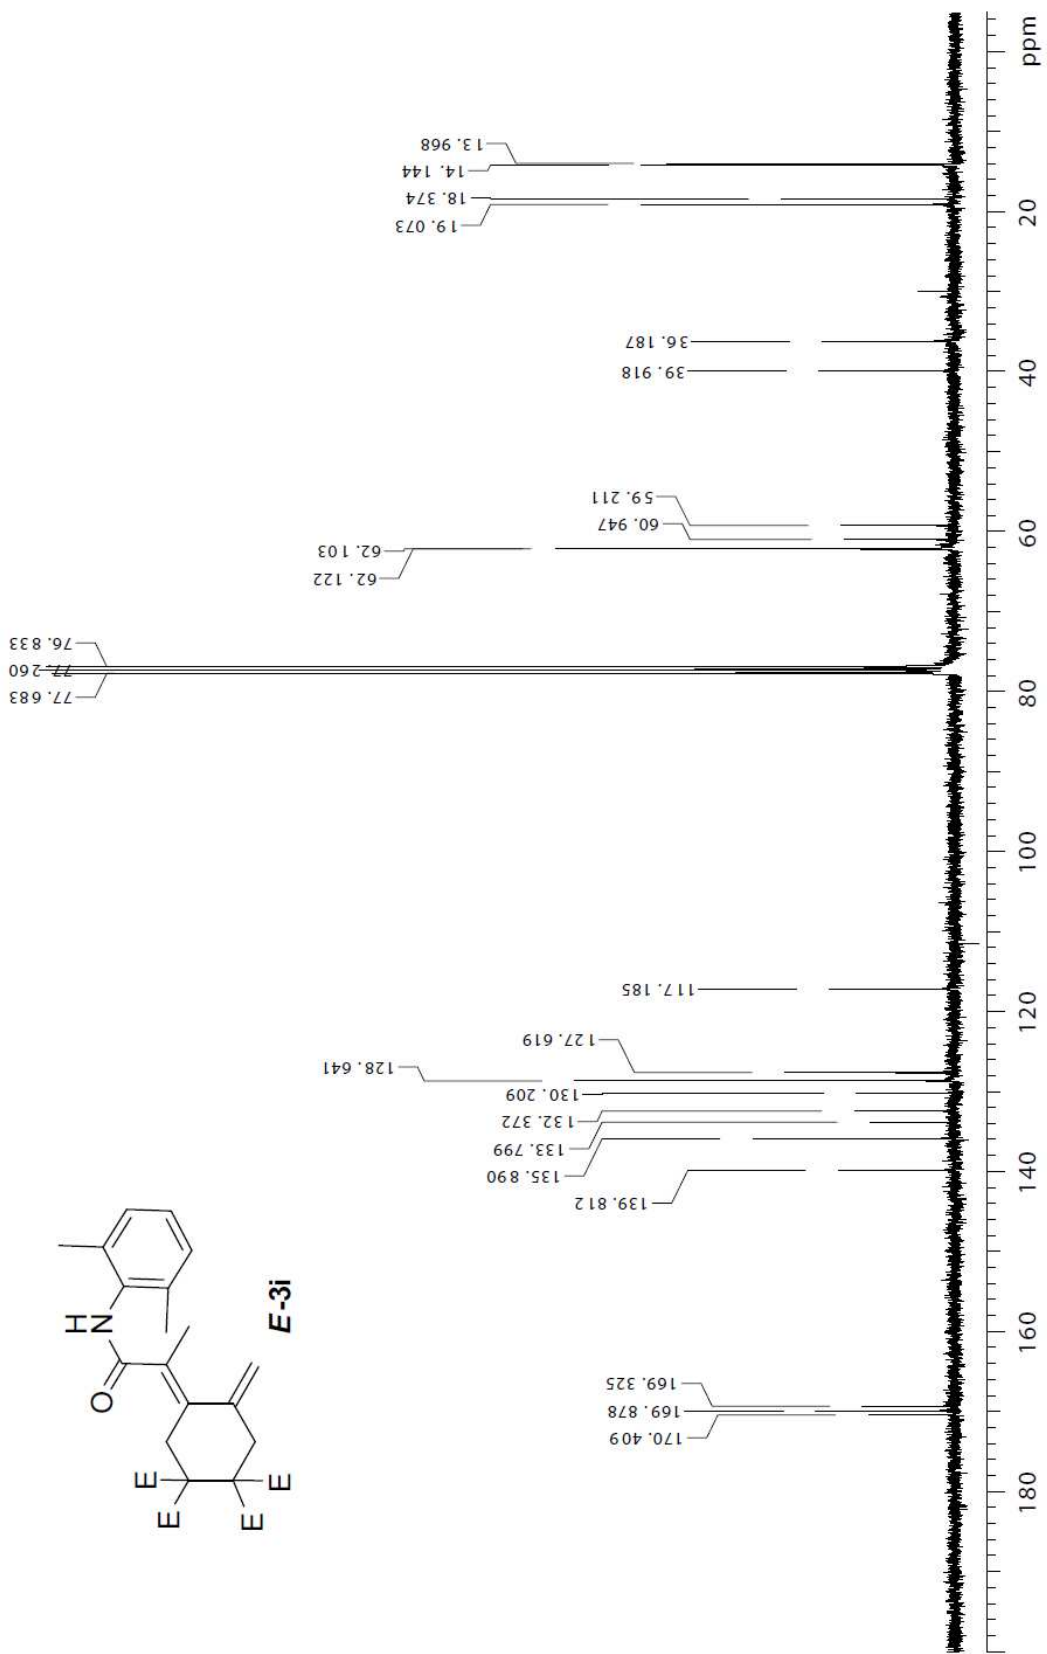

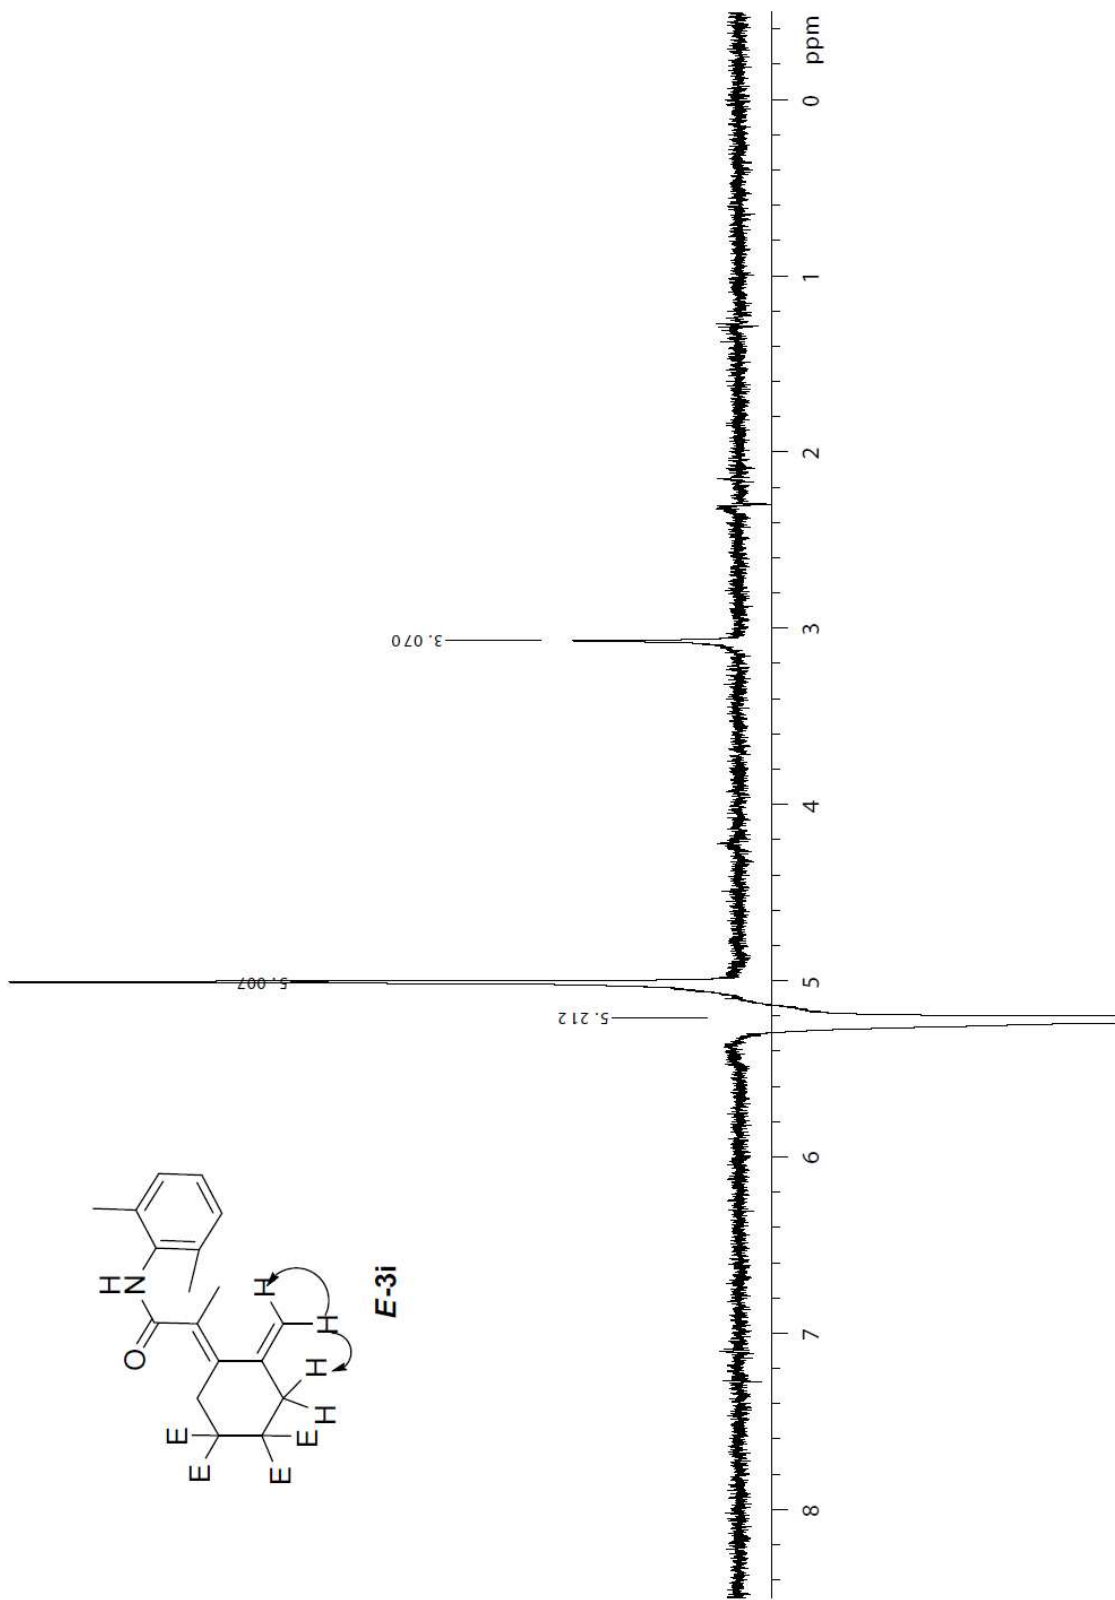

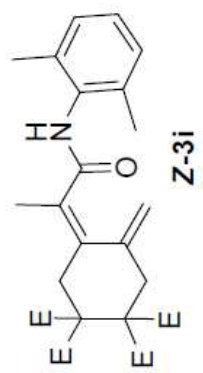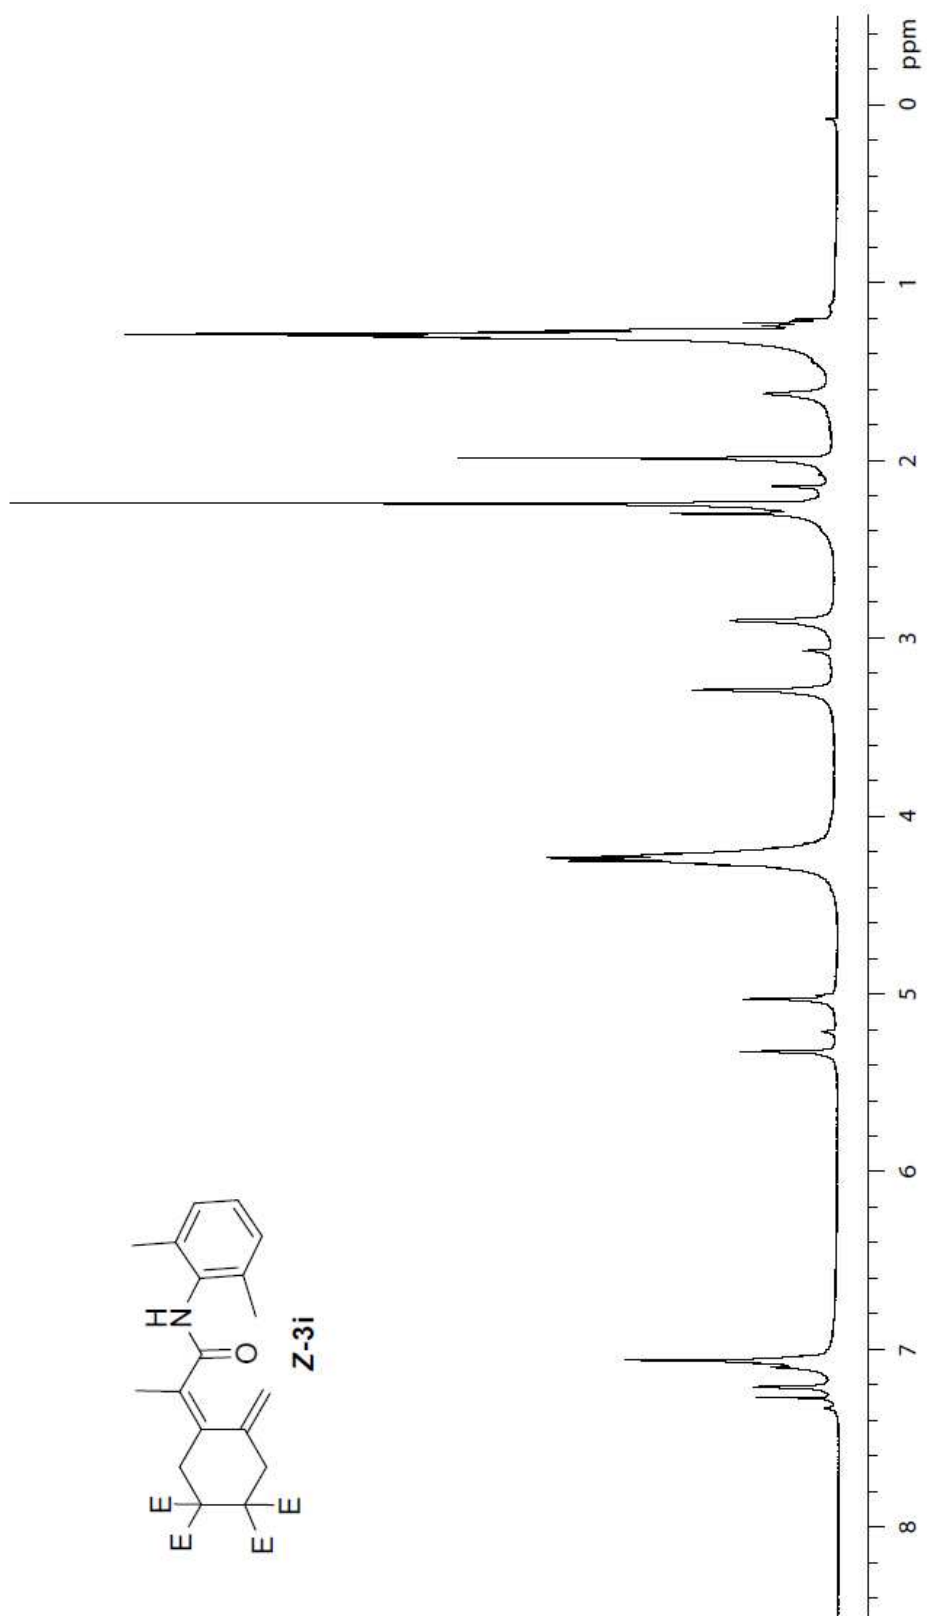

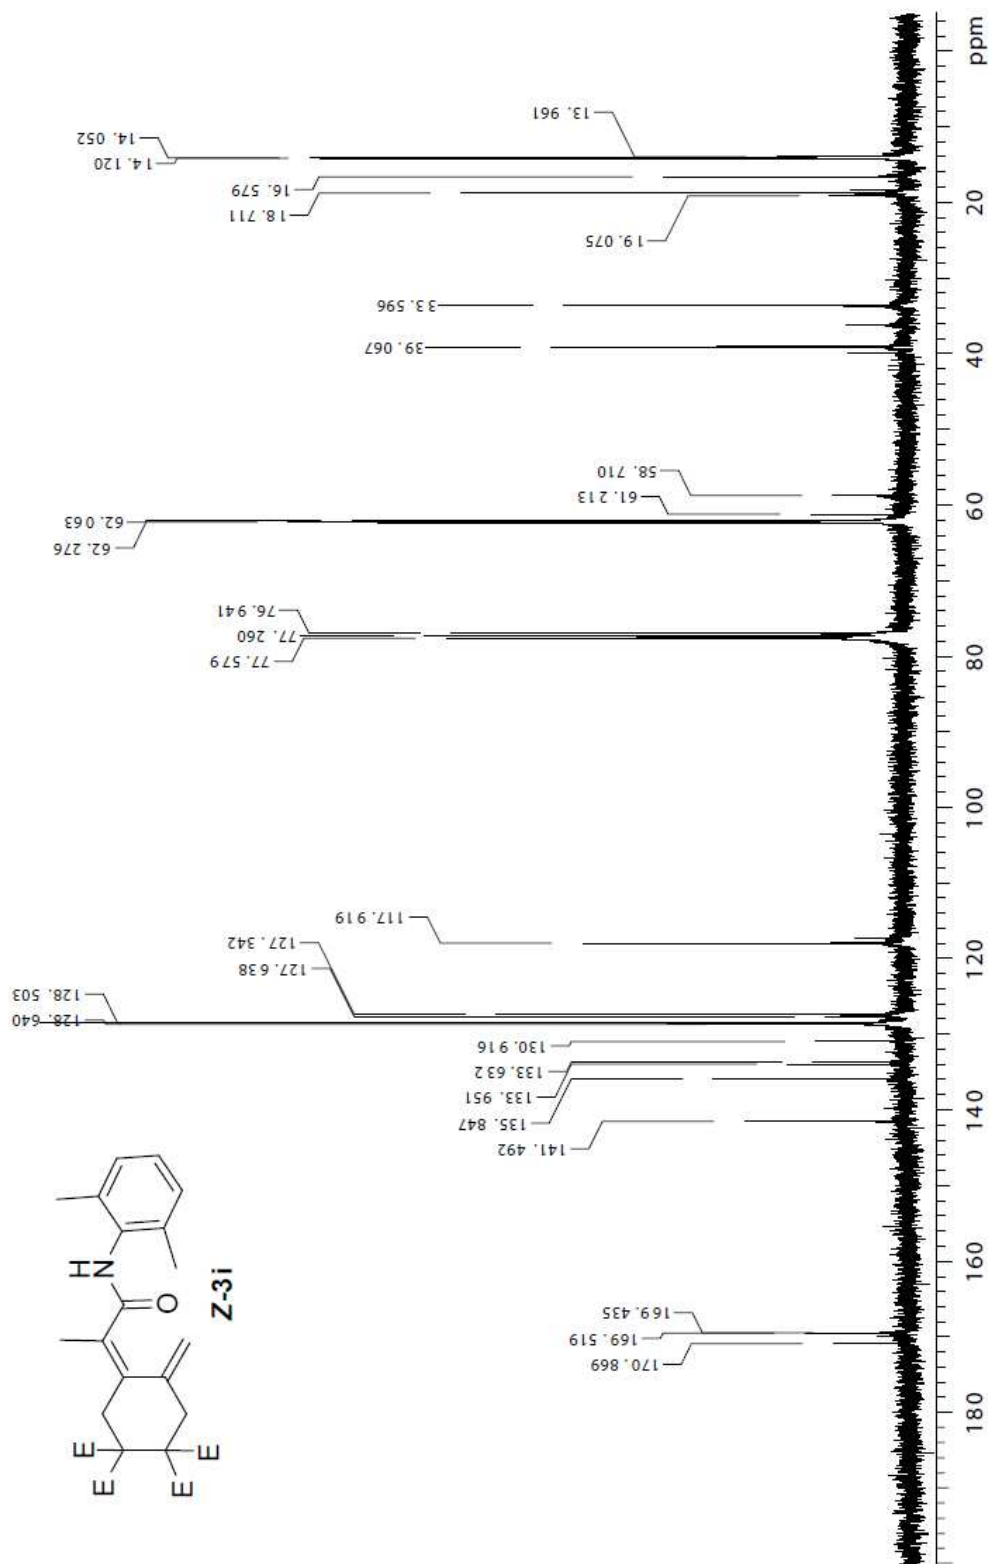



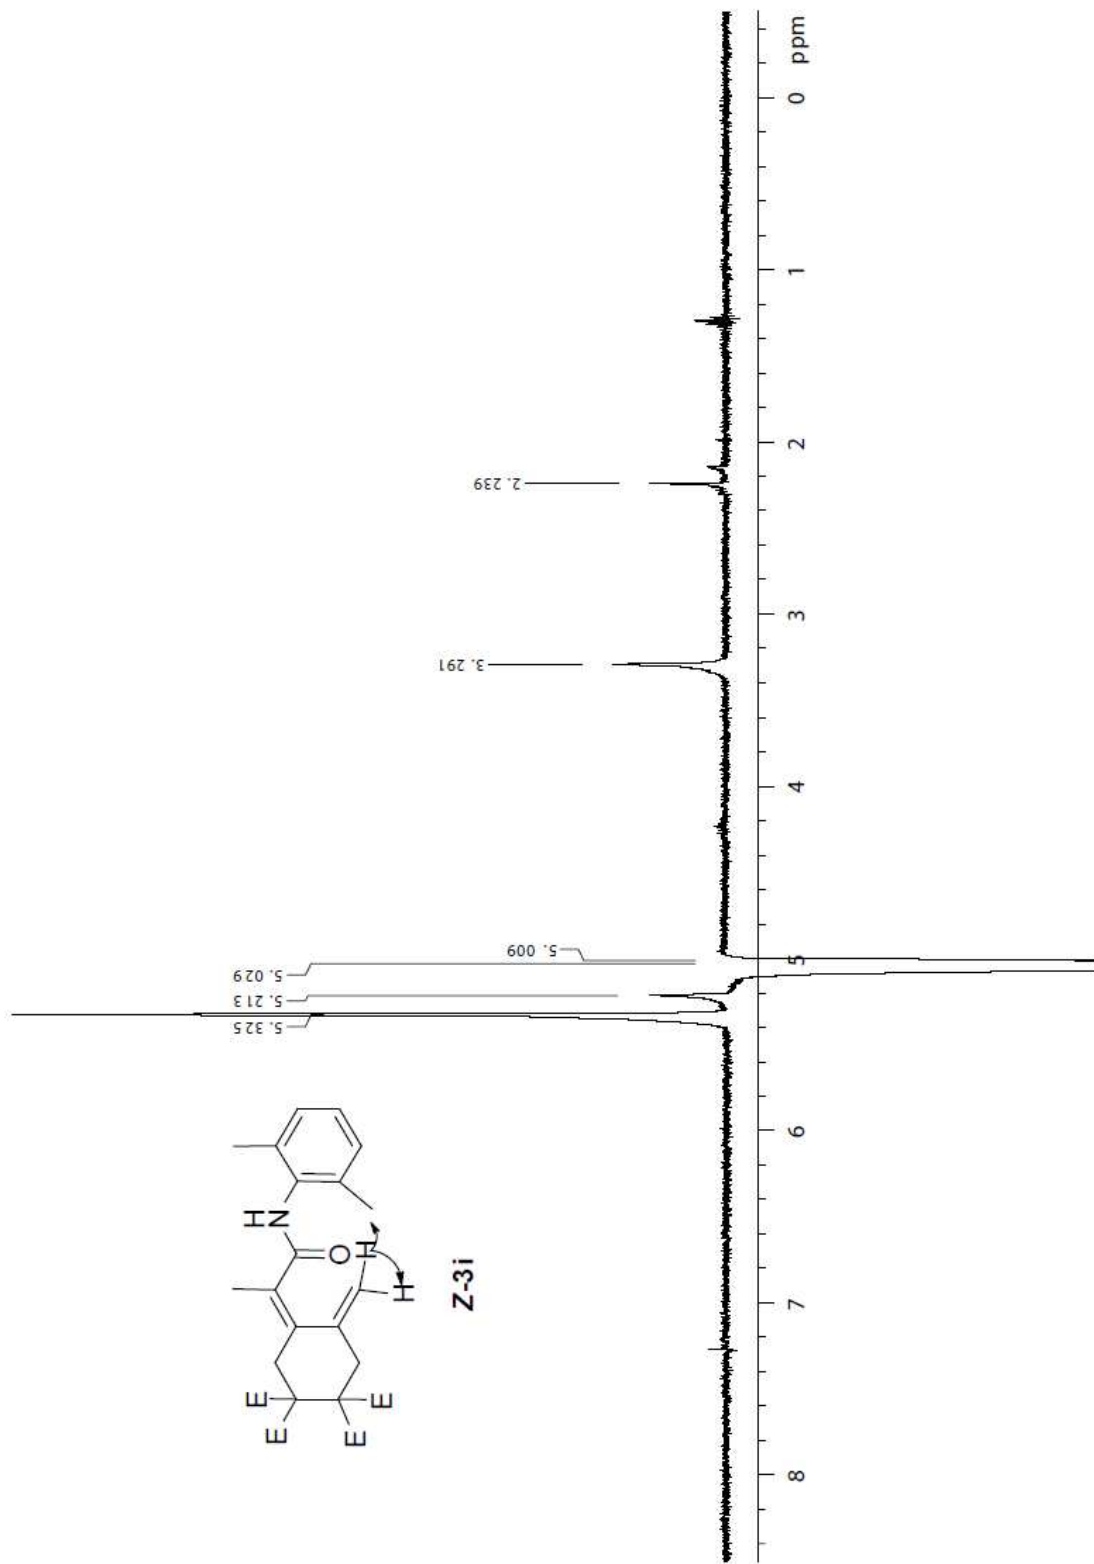

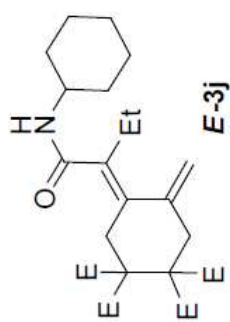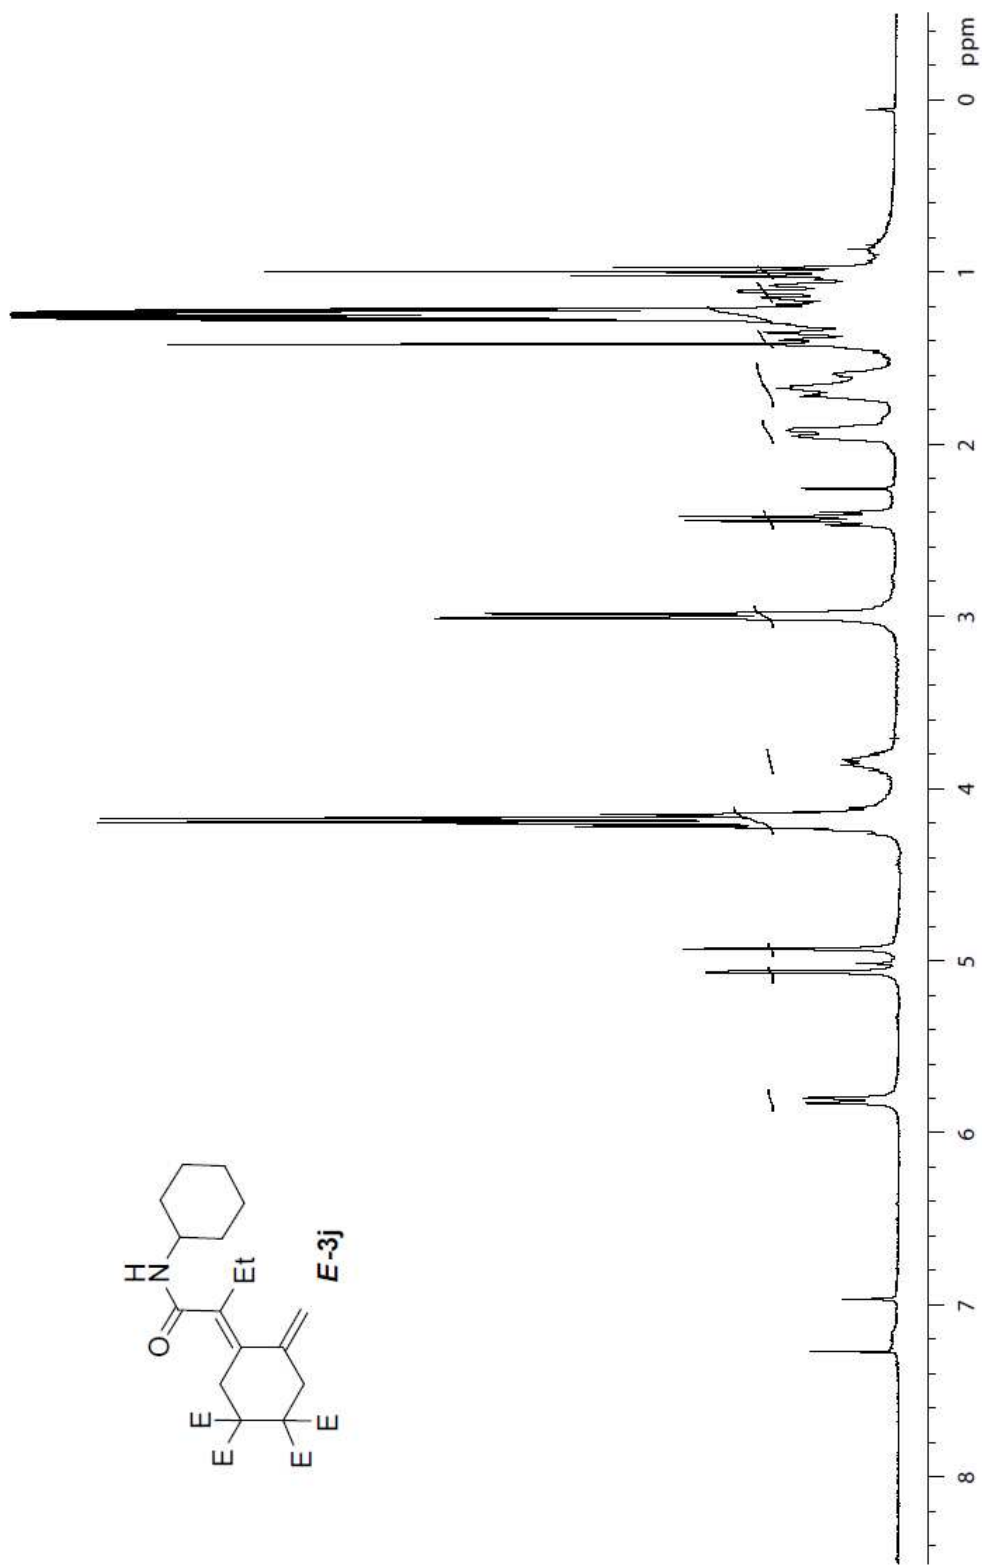

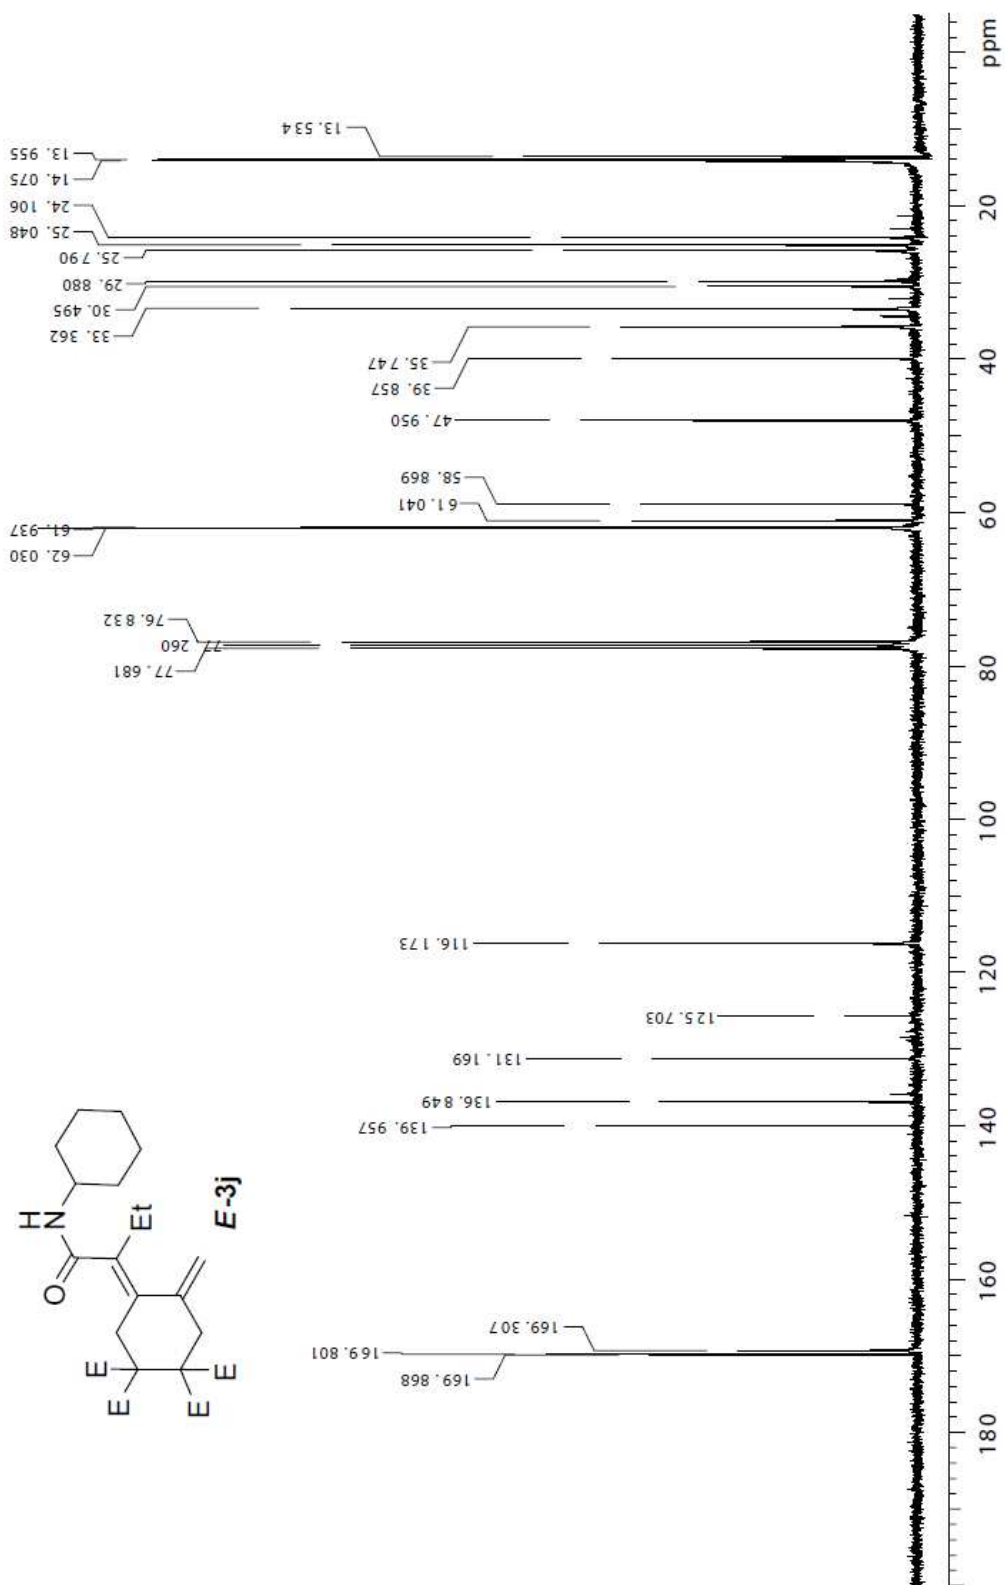

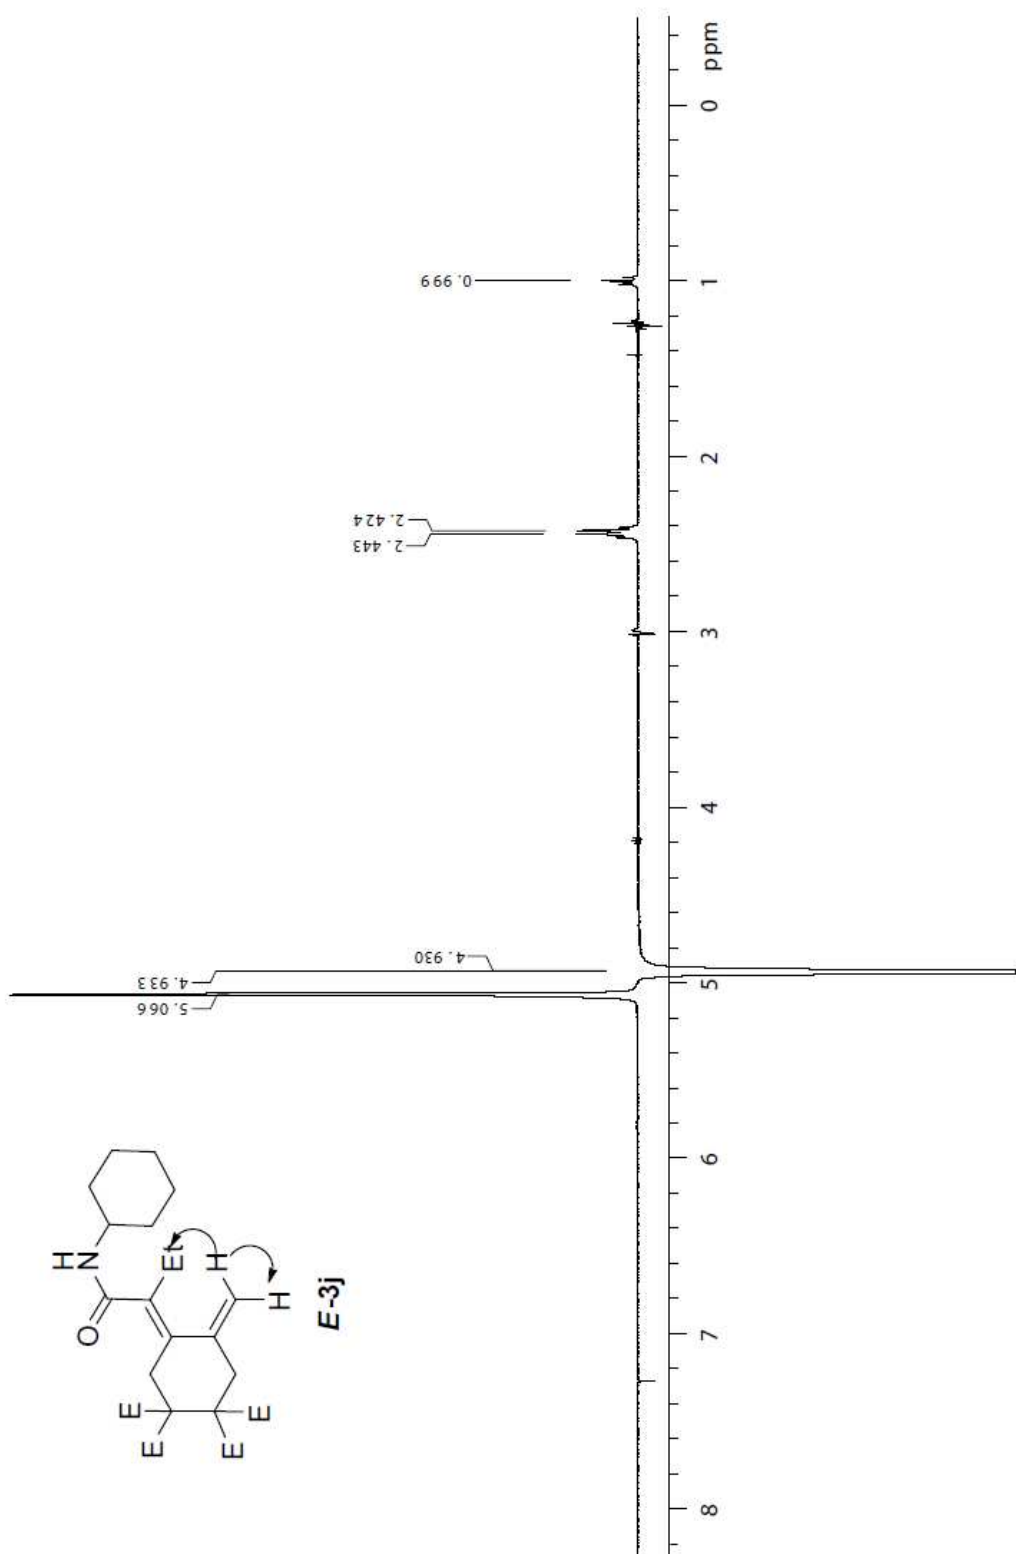

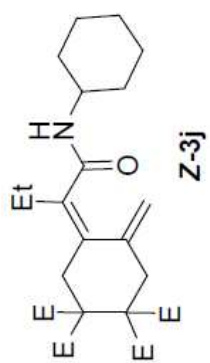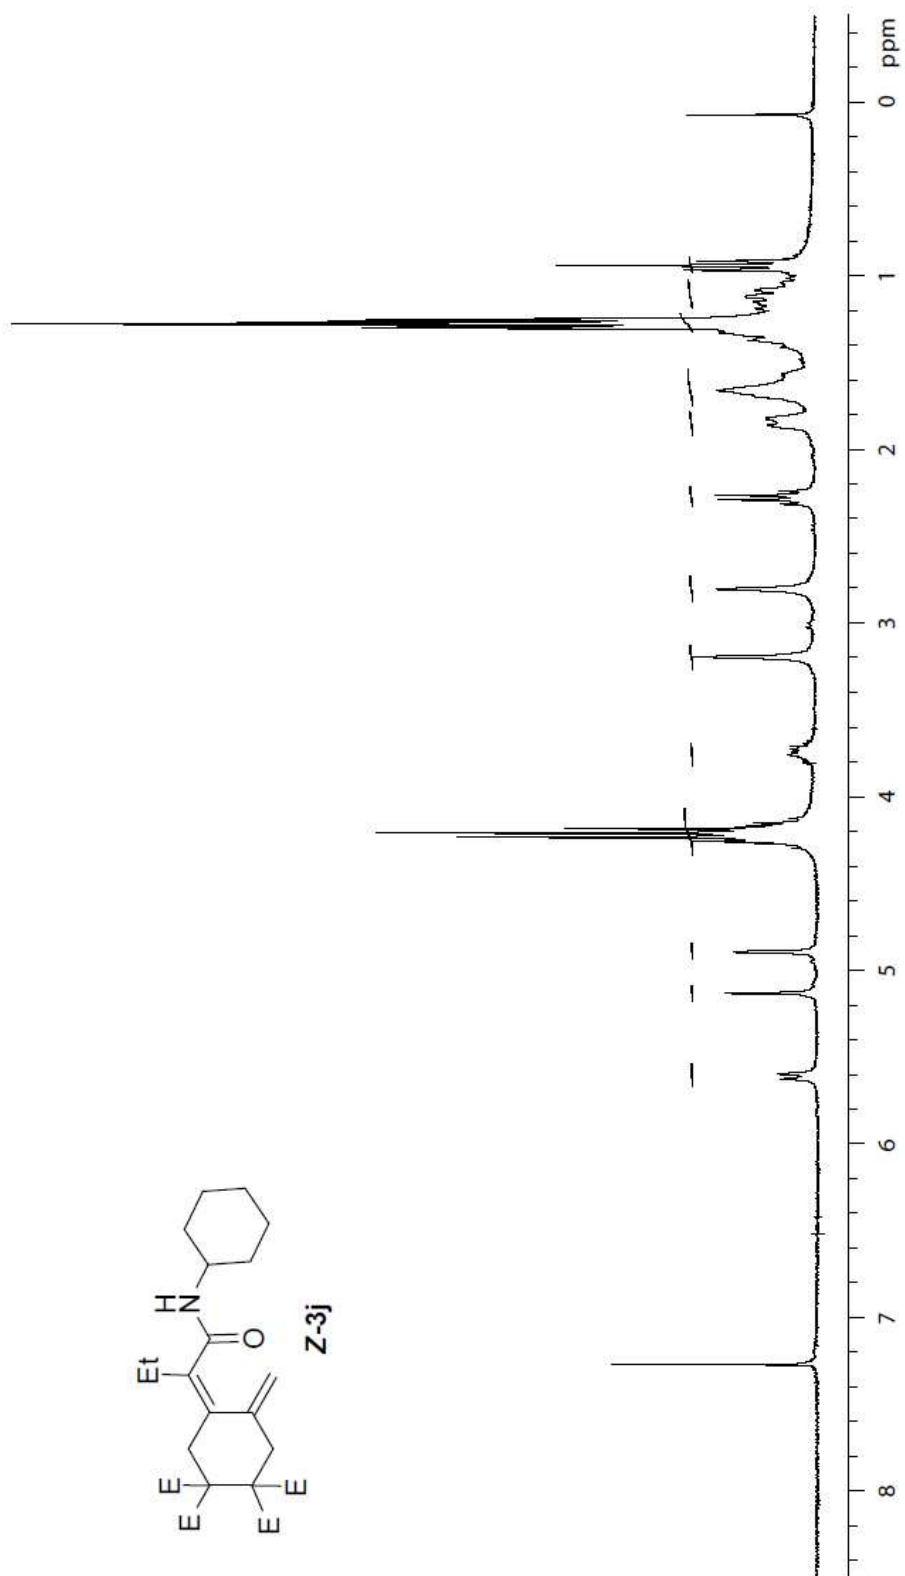

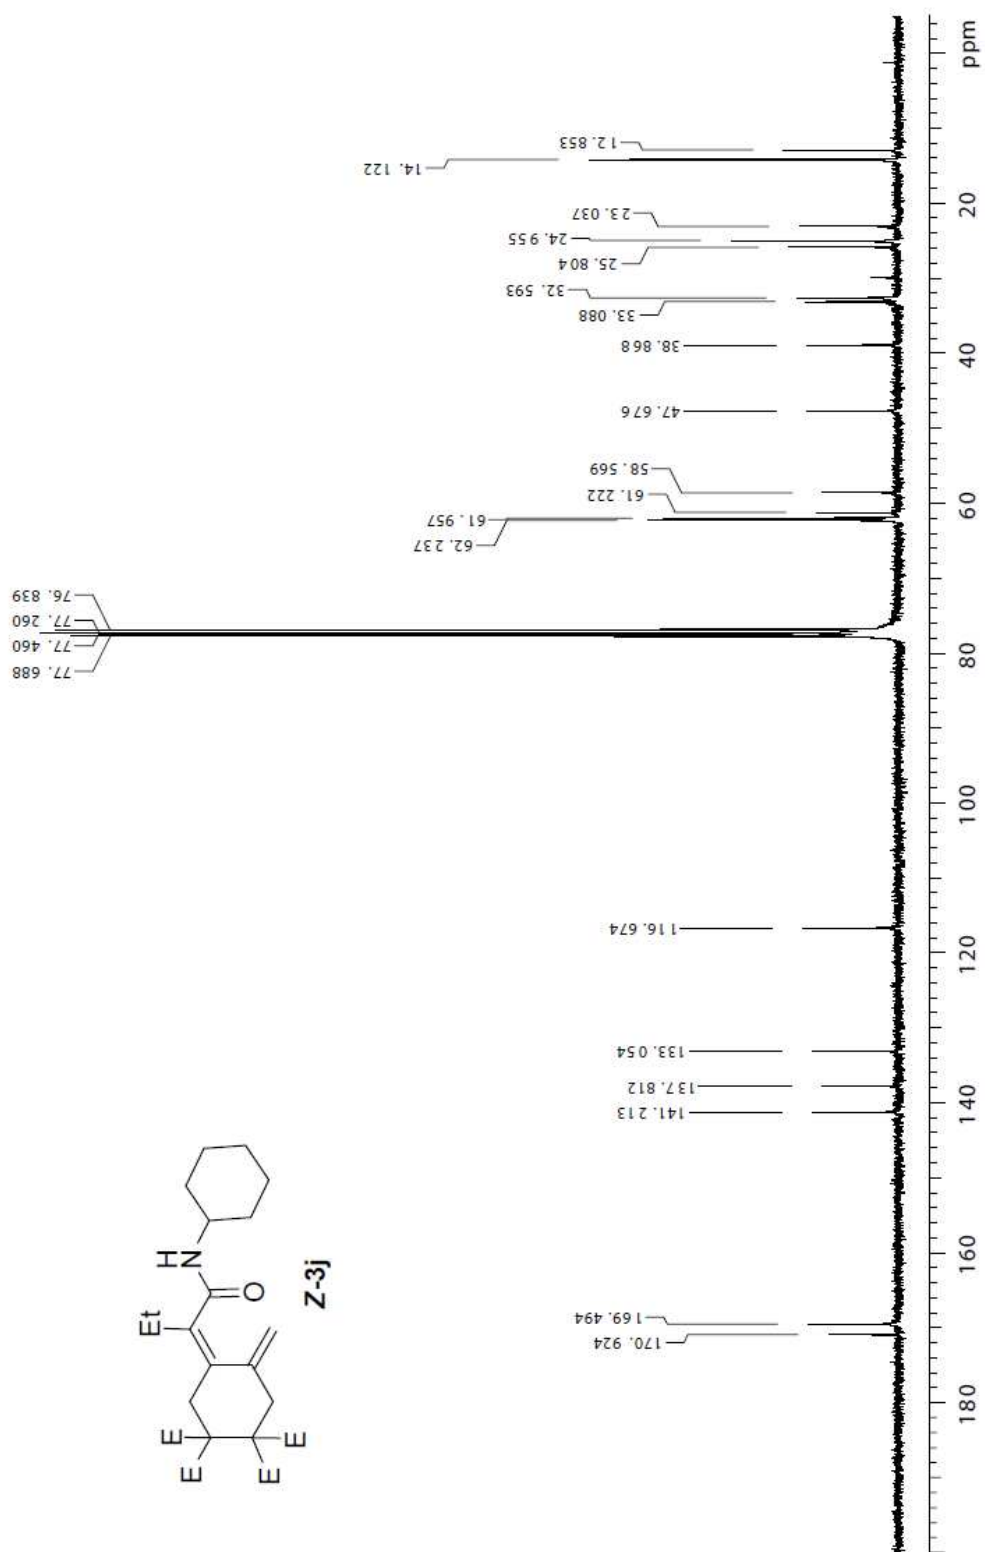

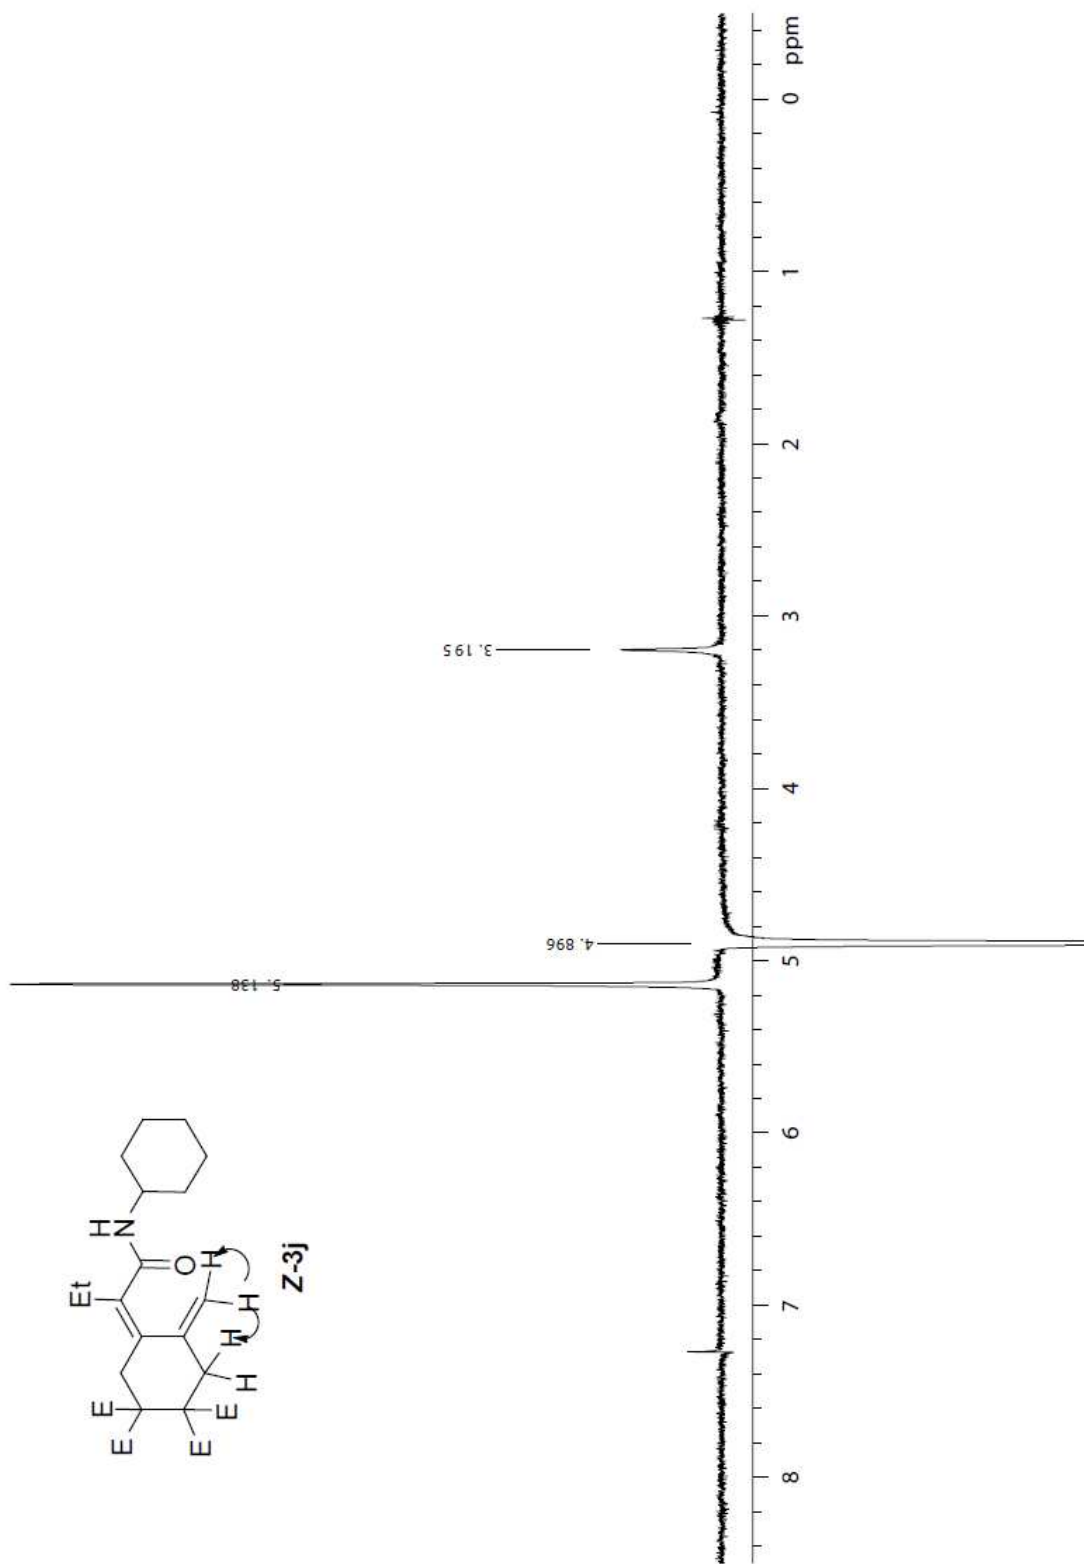

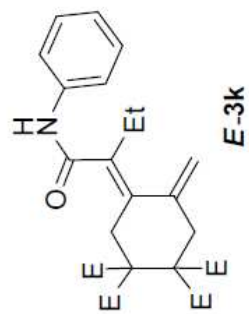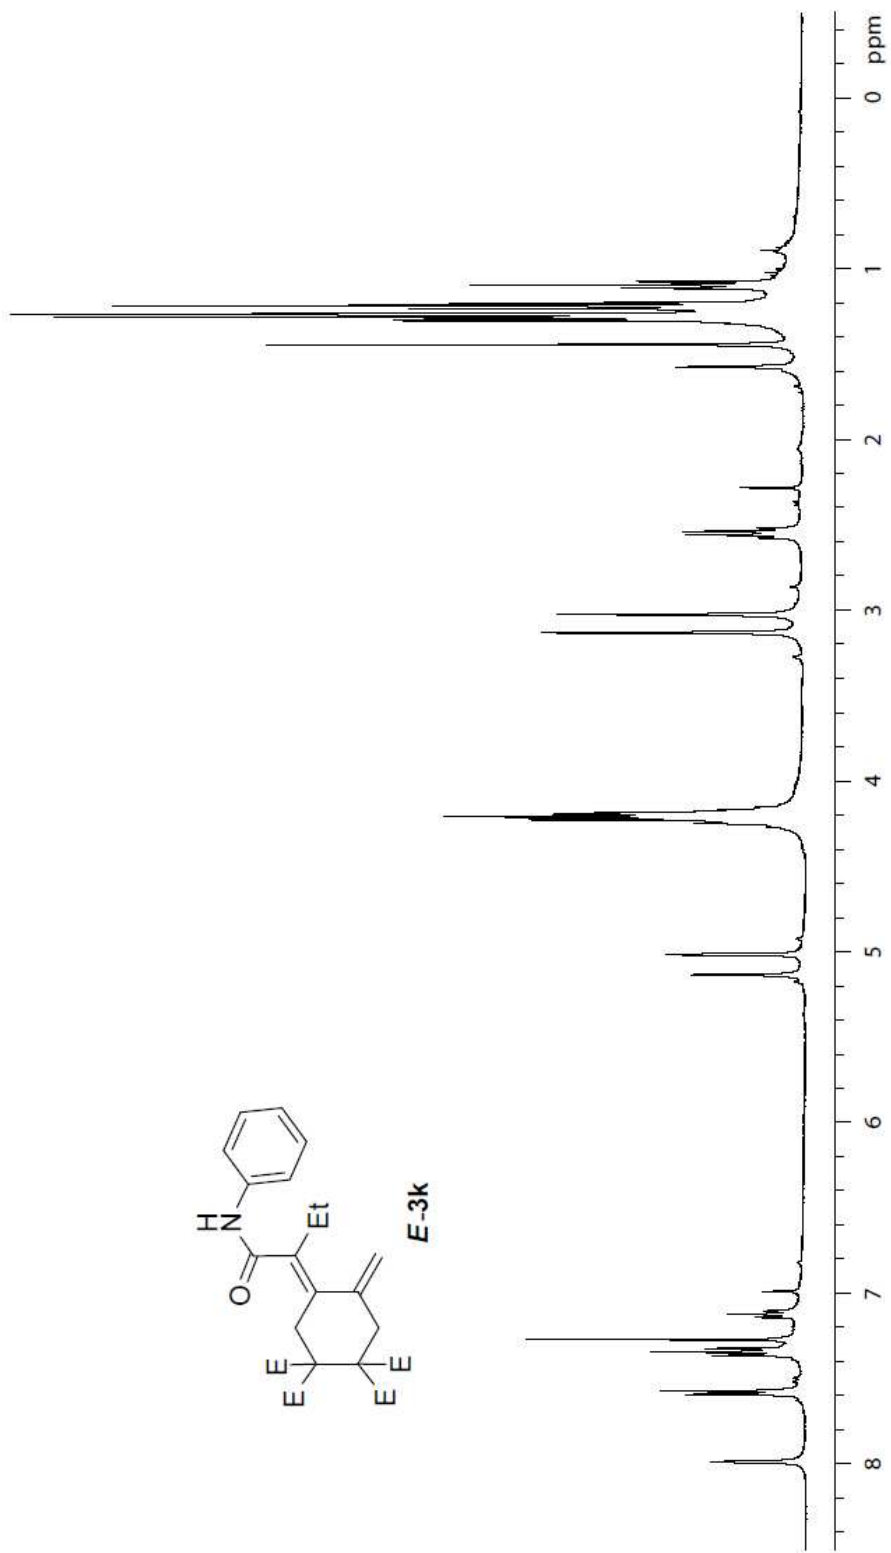



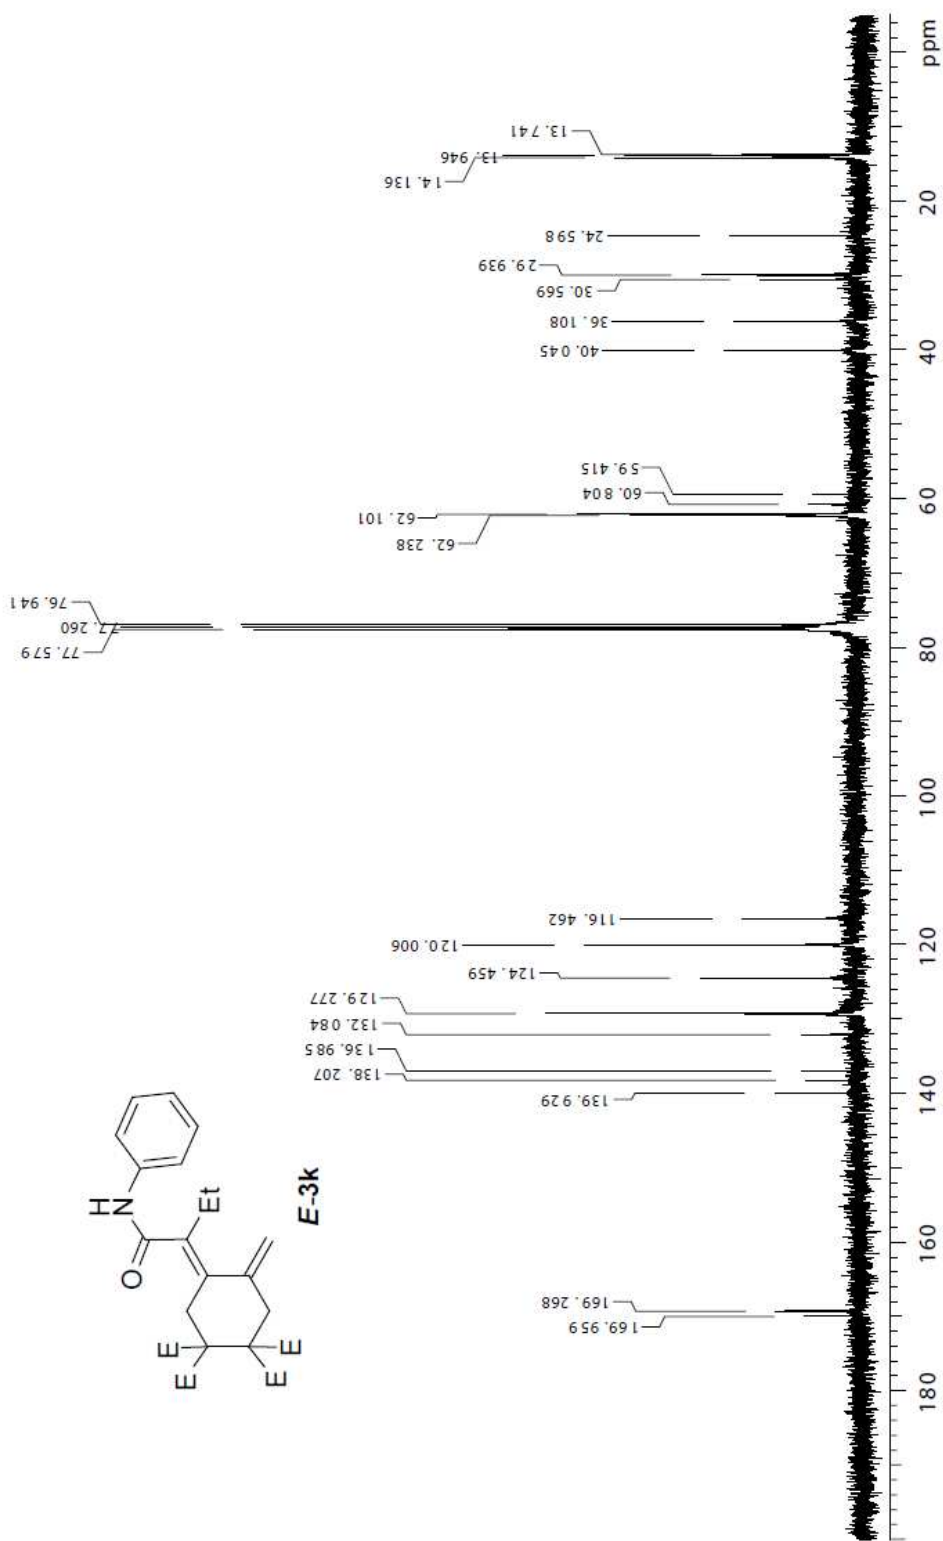

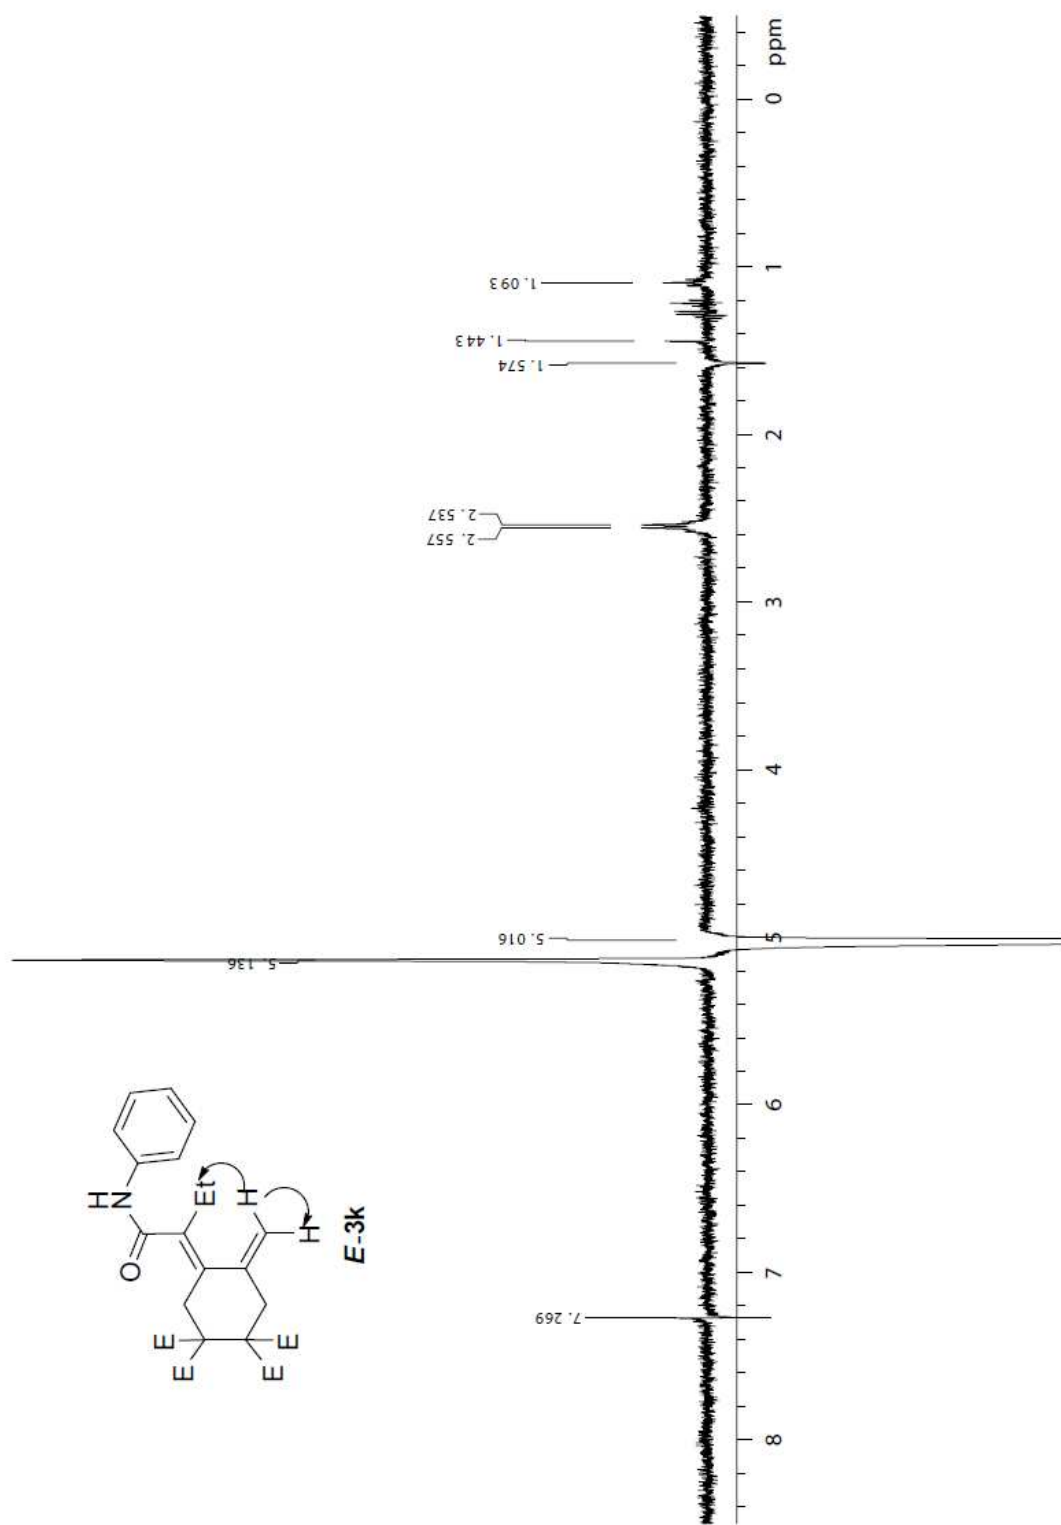

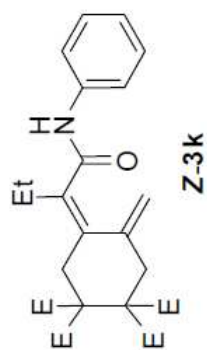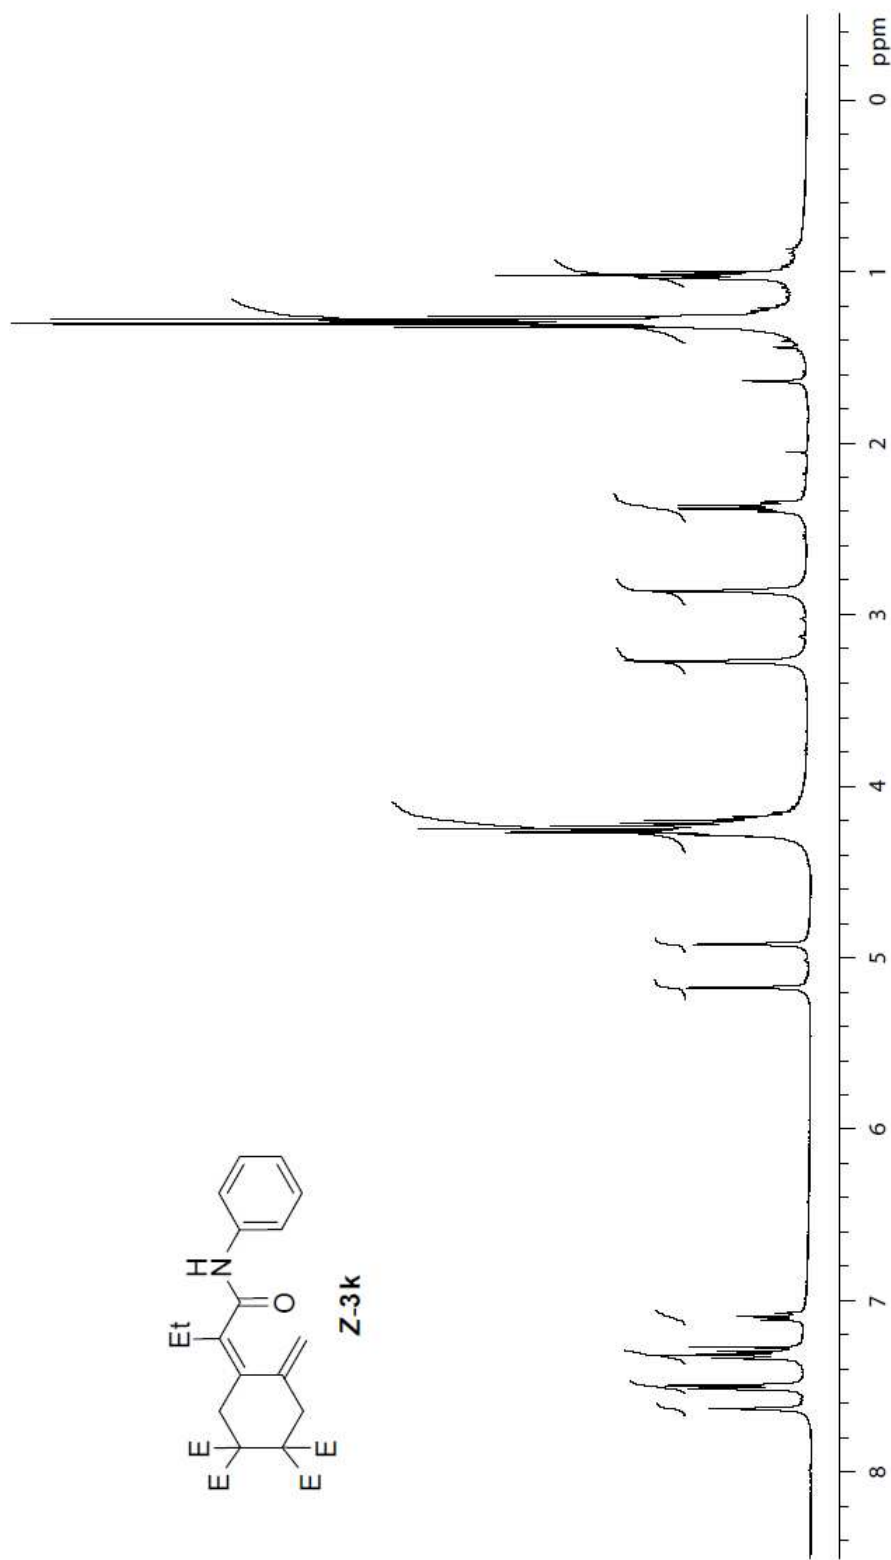

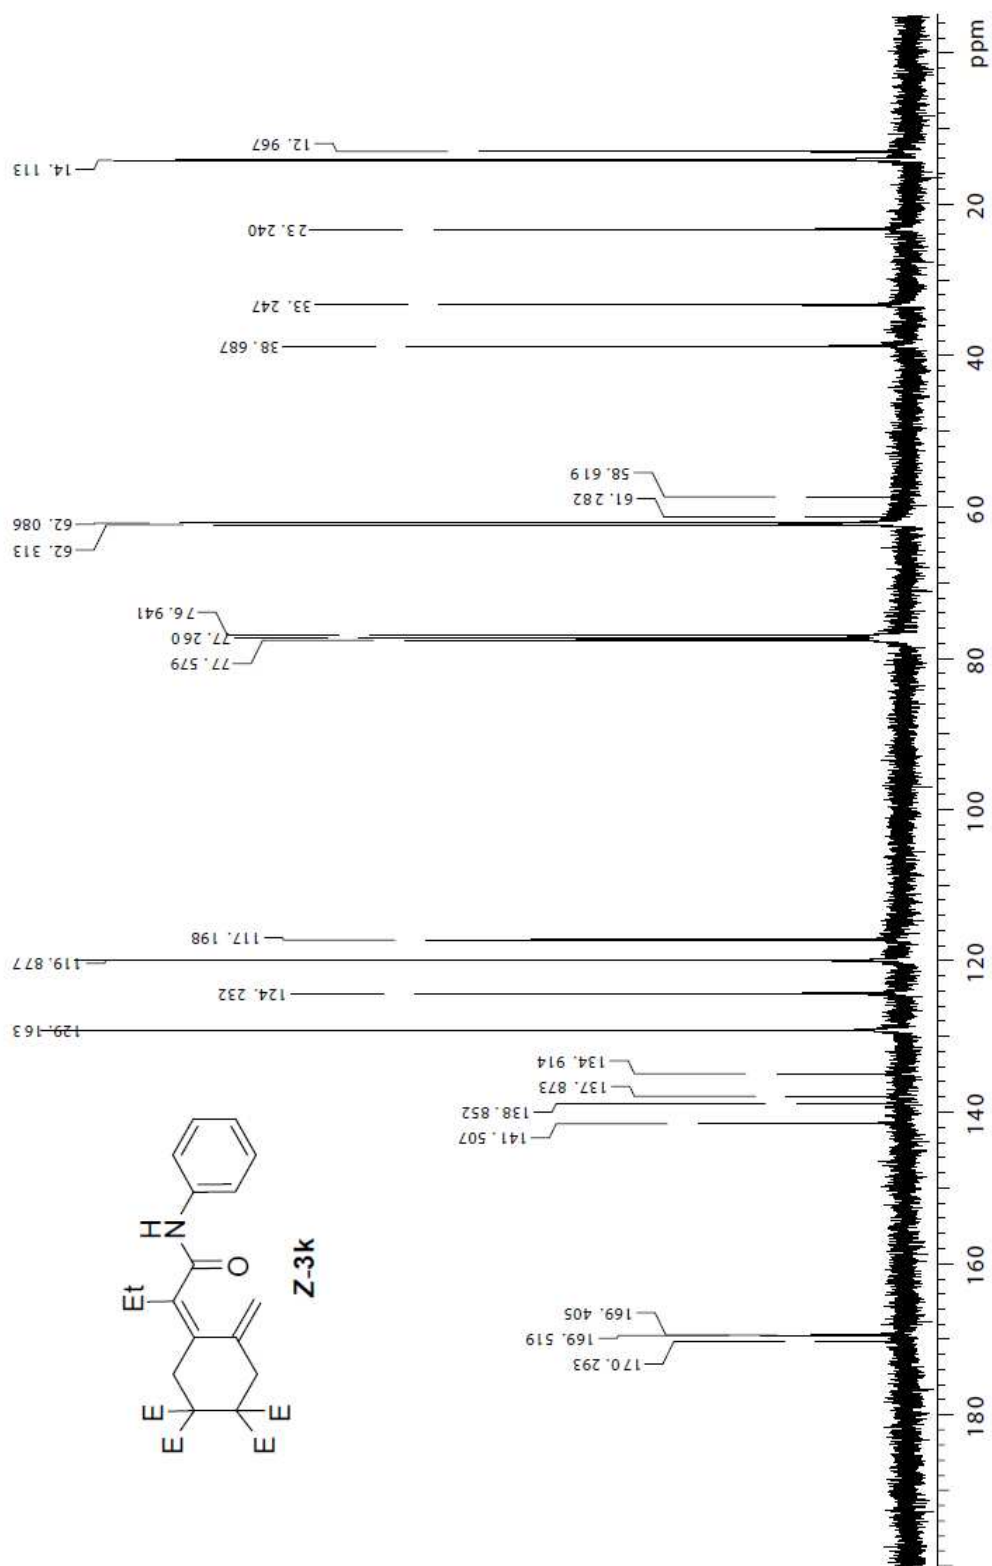

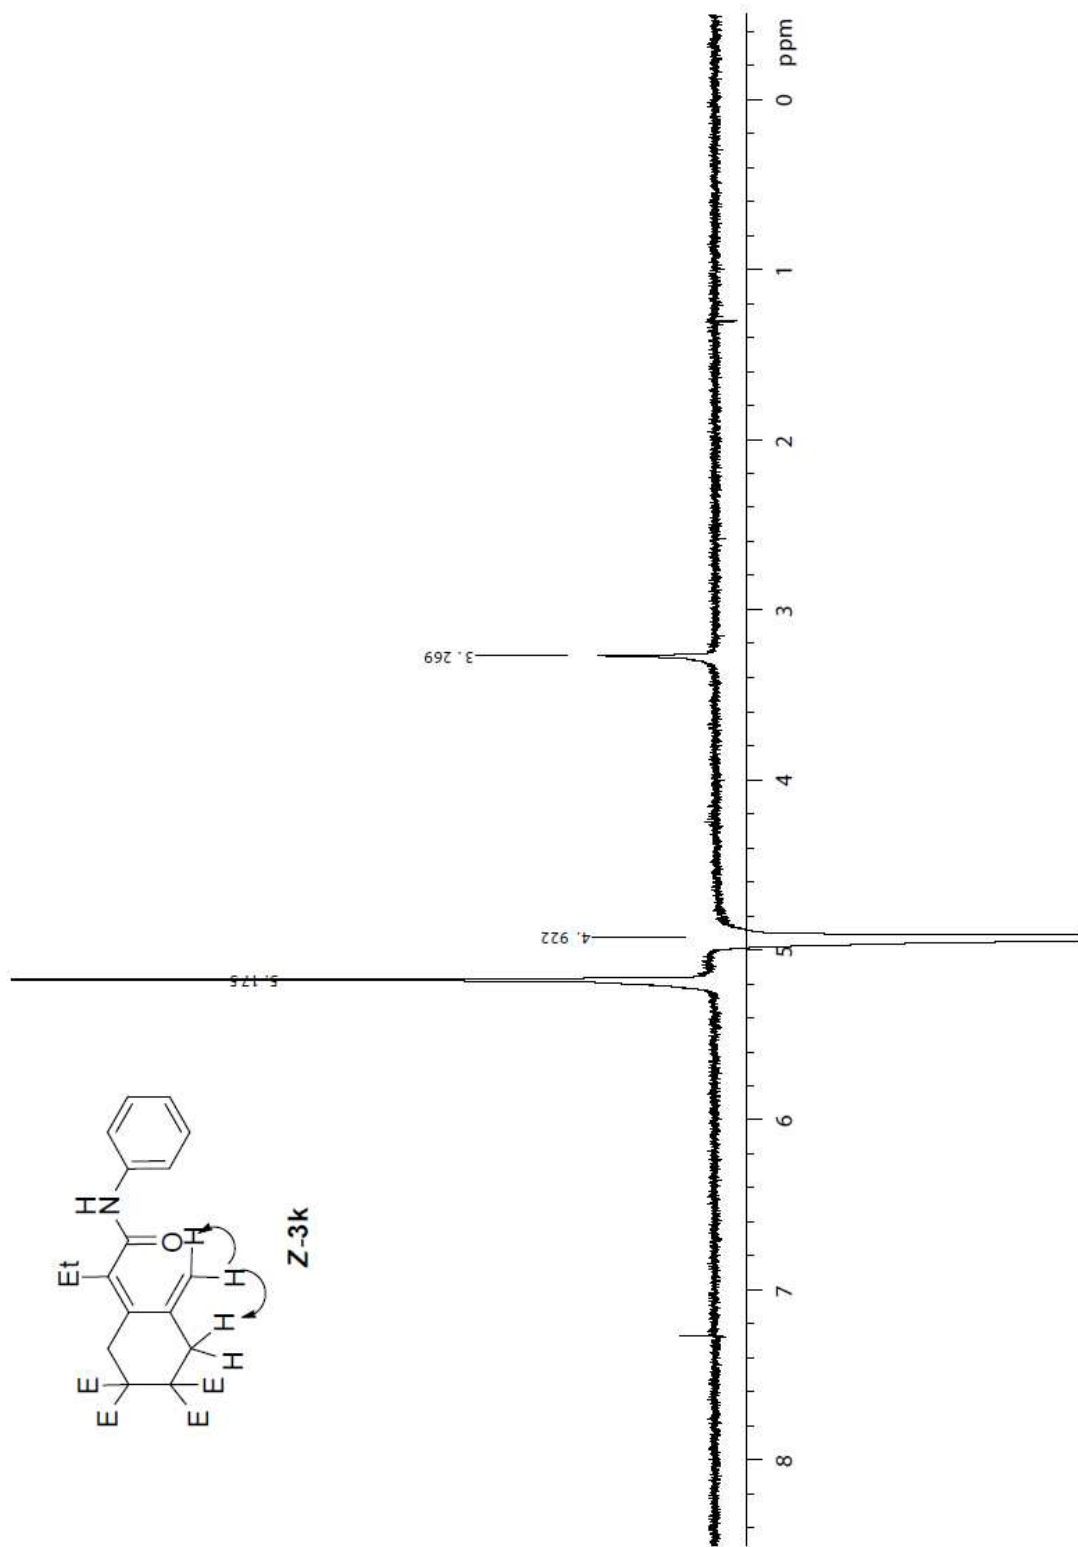

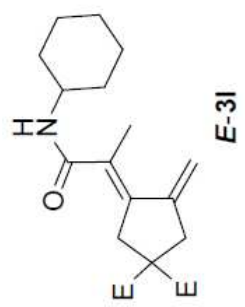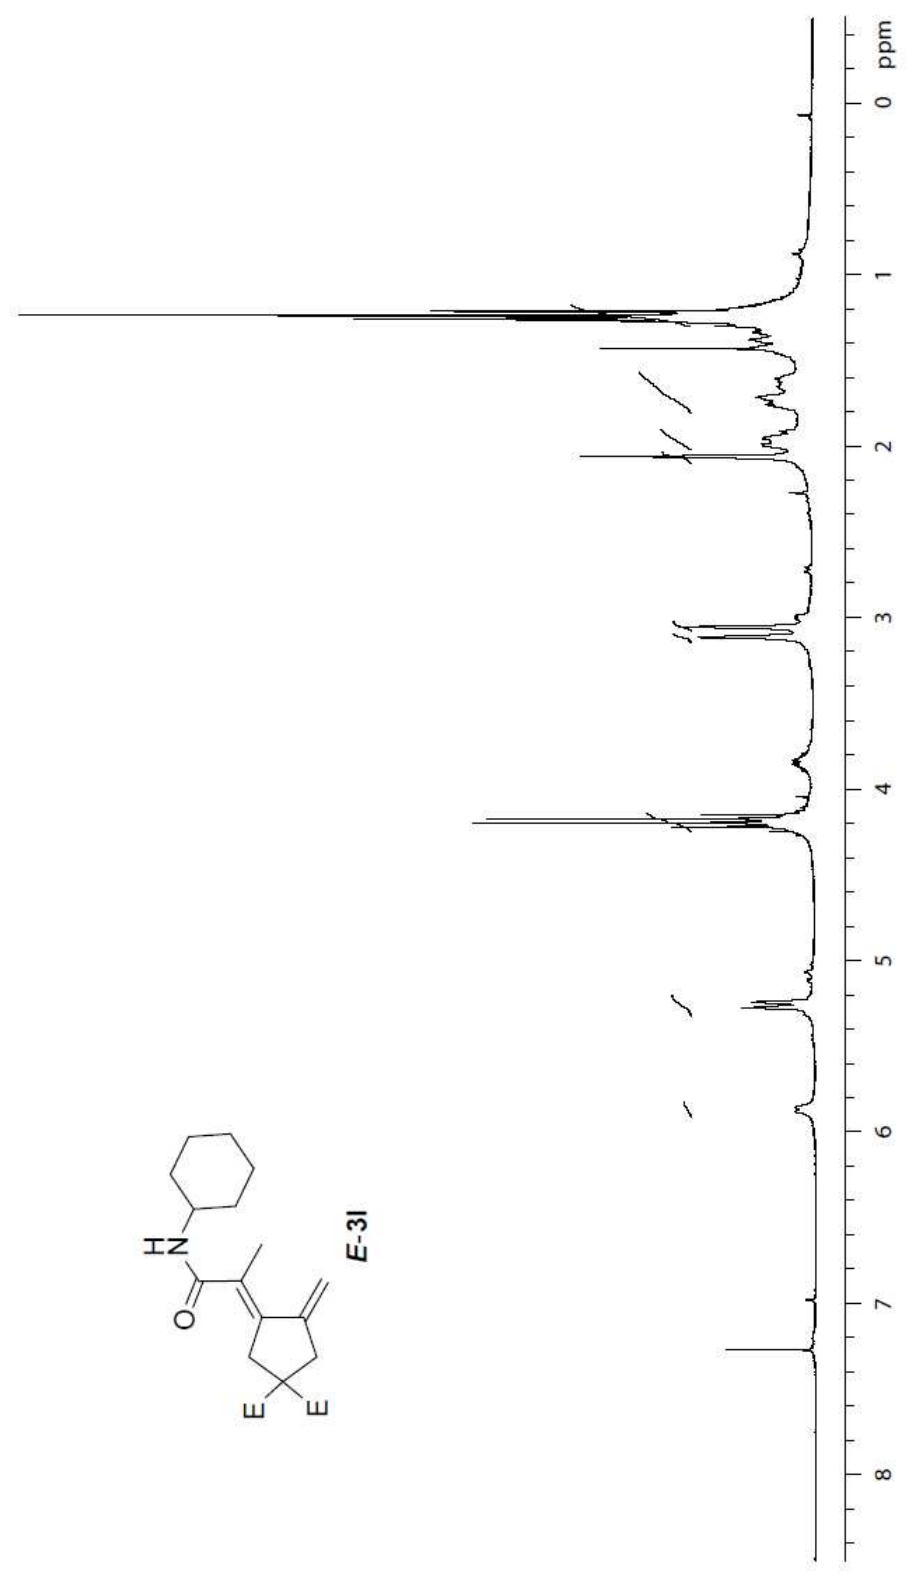

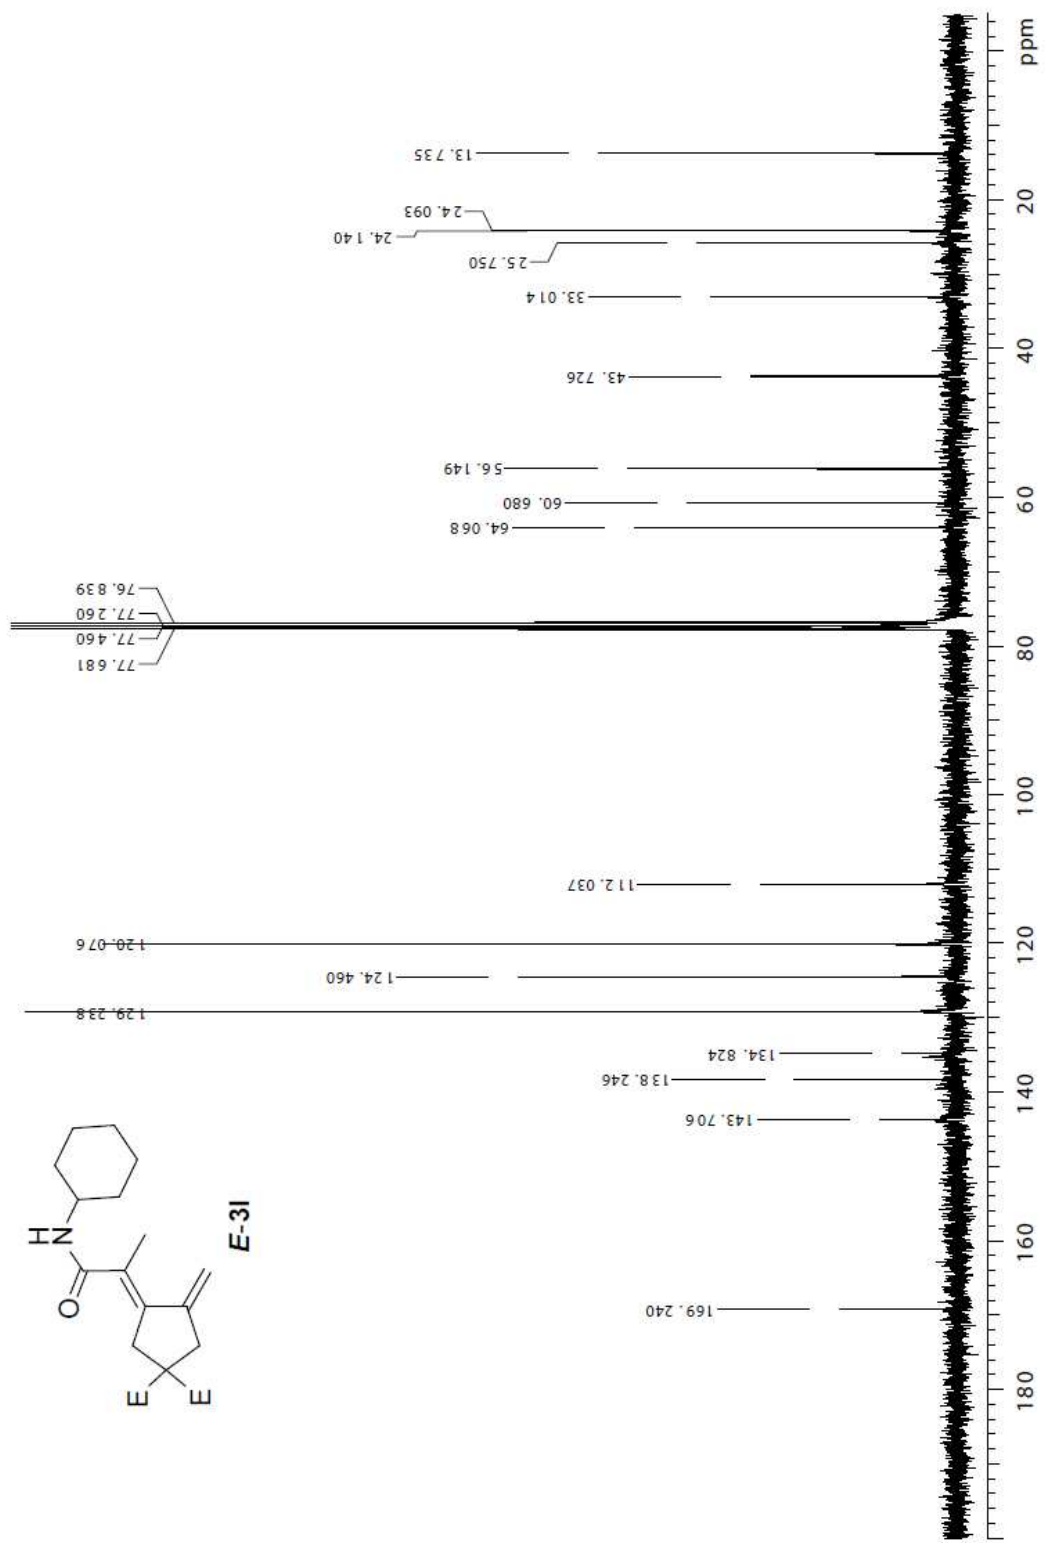

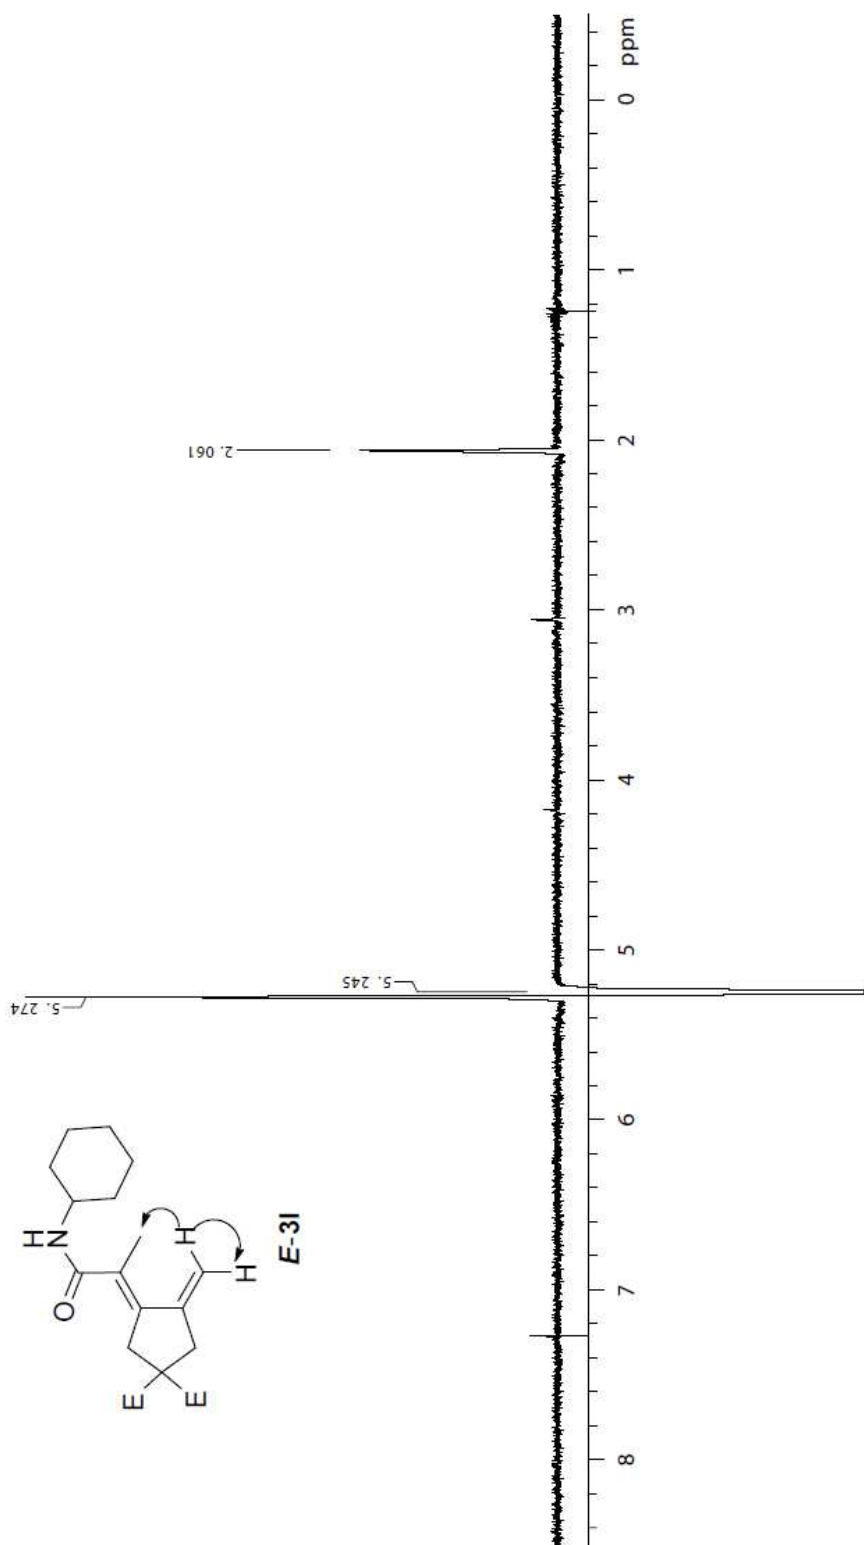



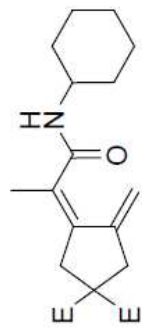

Z-31

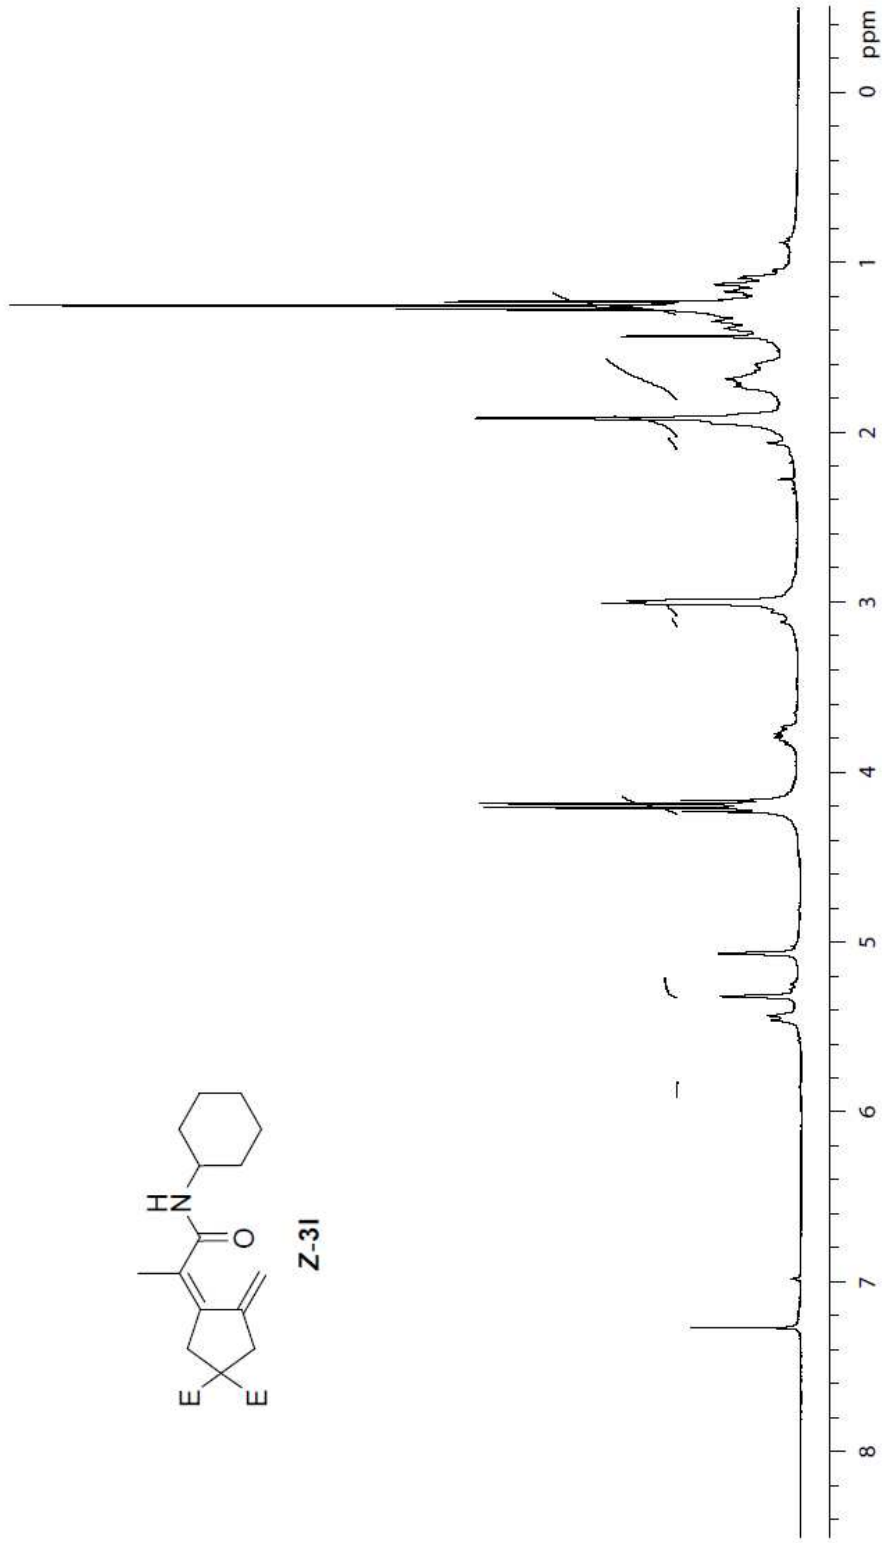

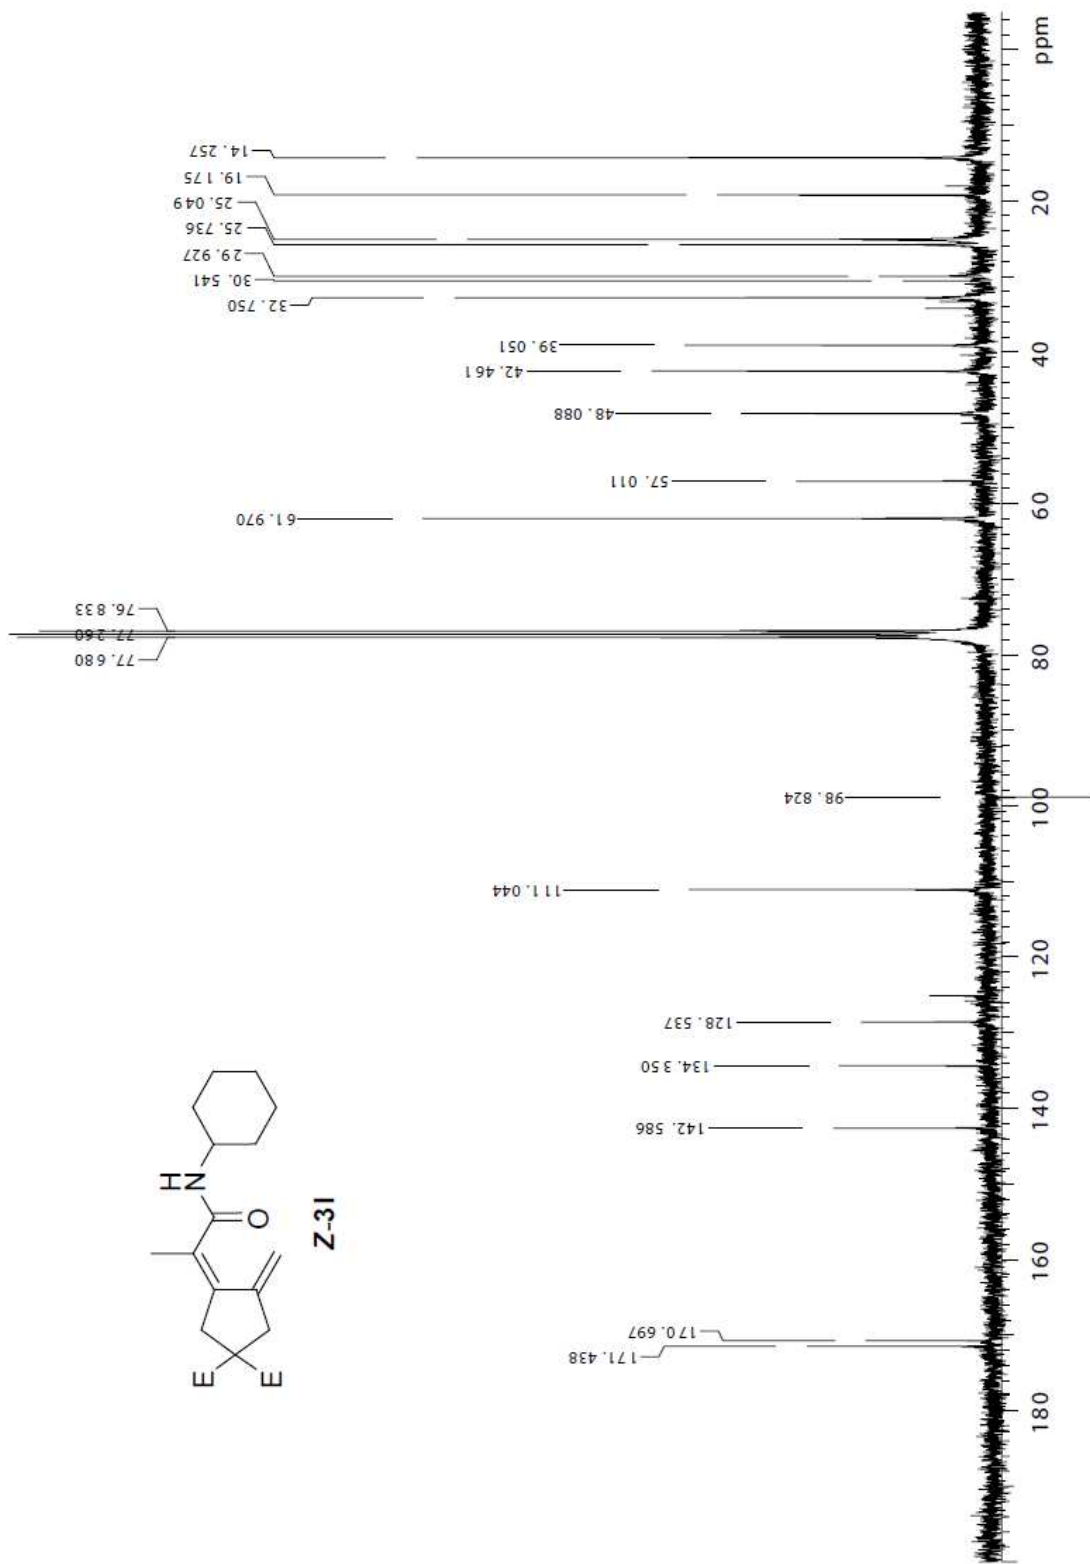

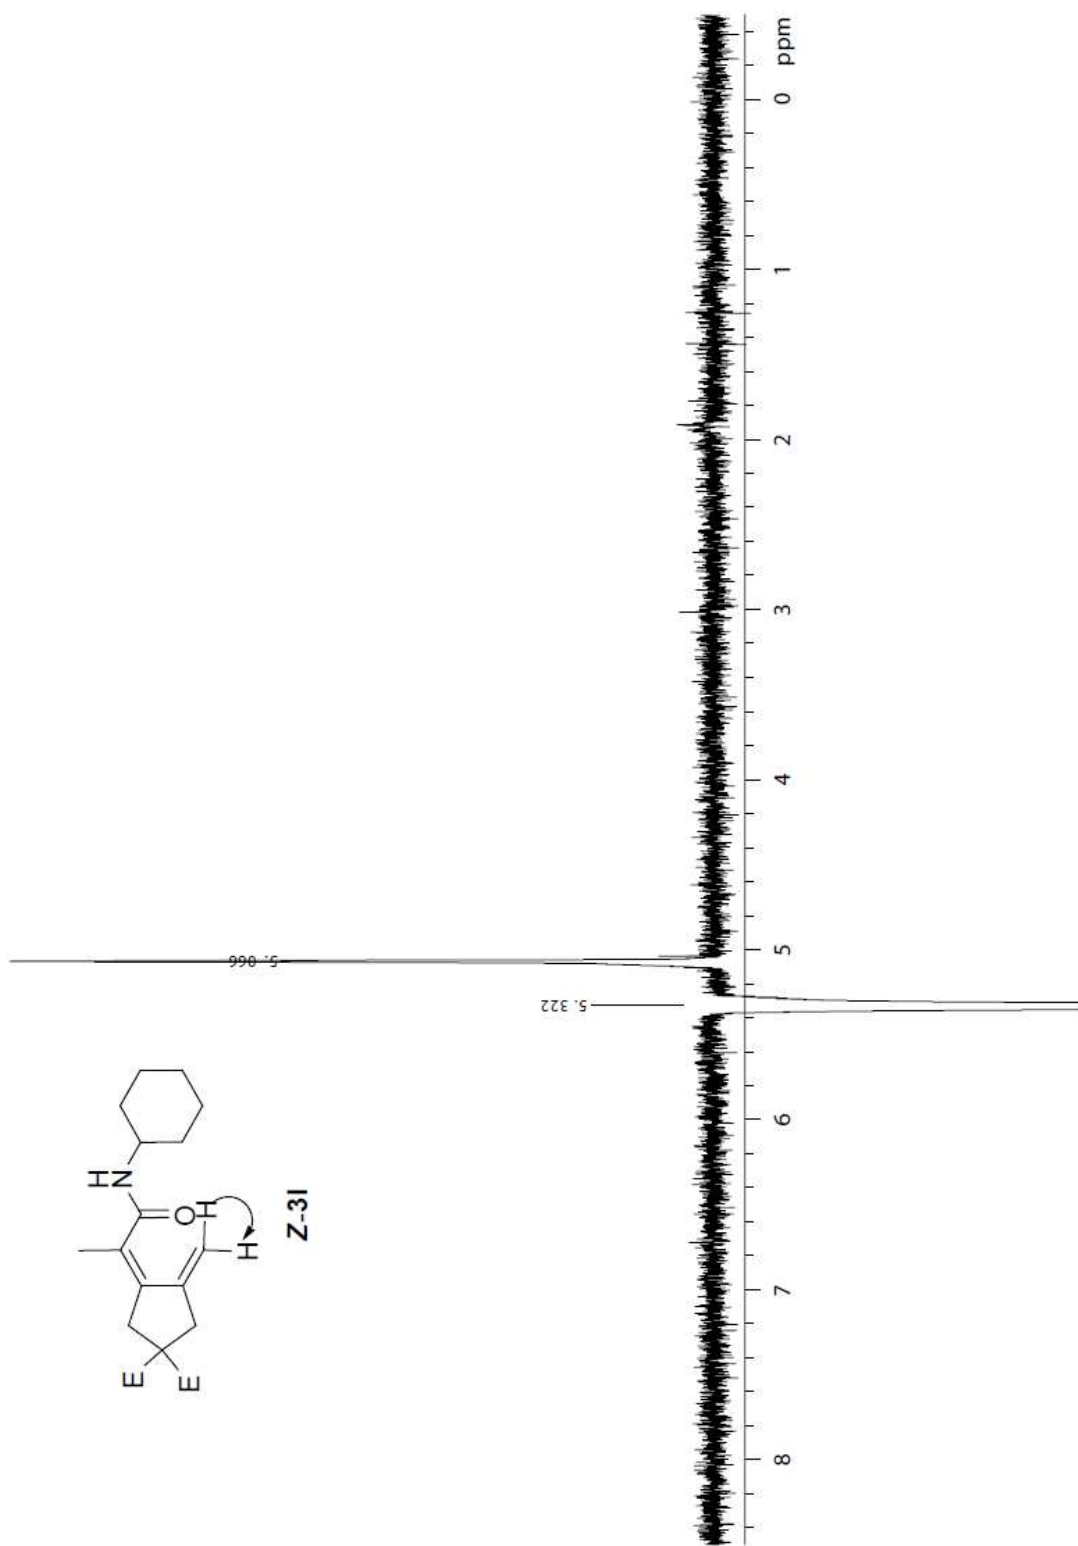

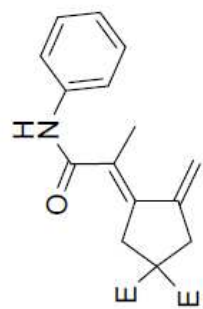

**E-3m**

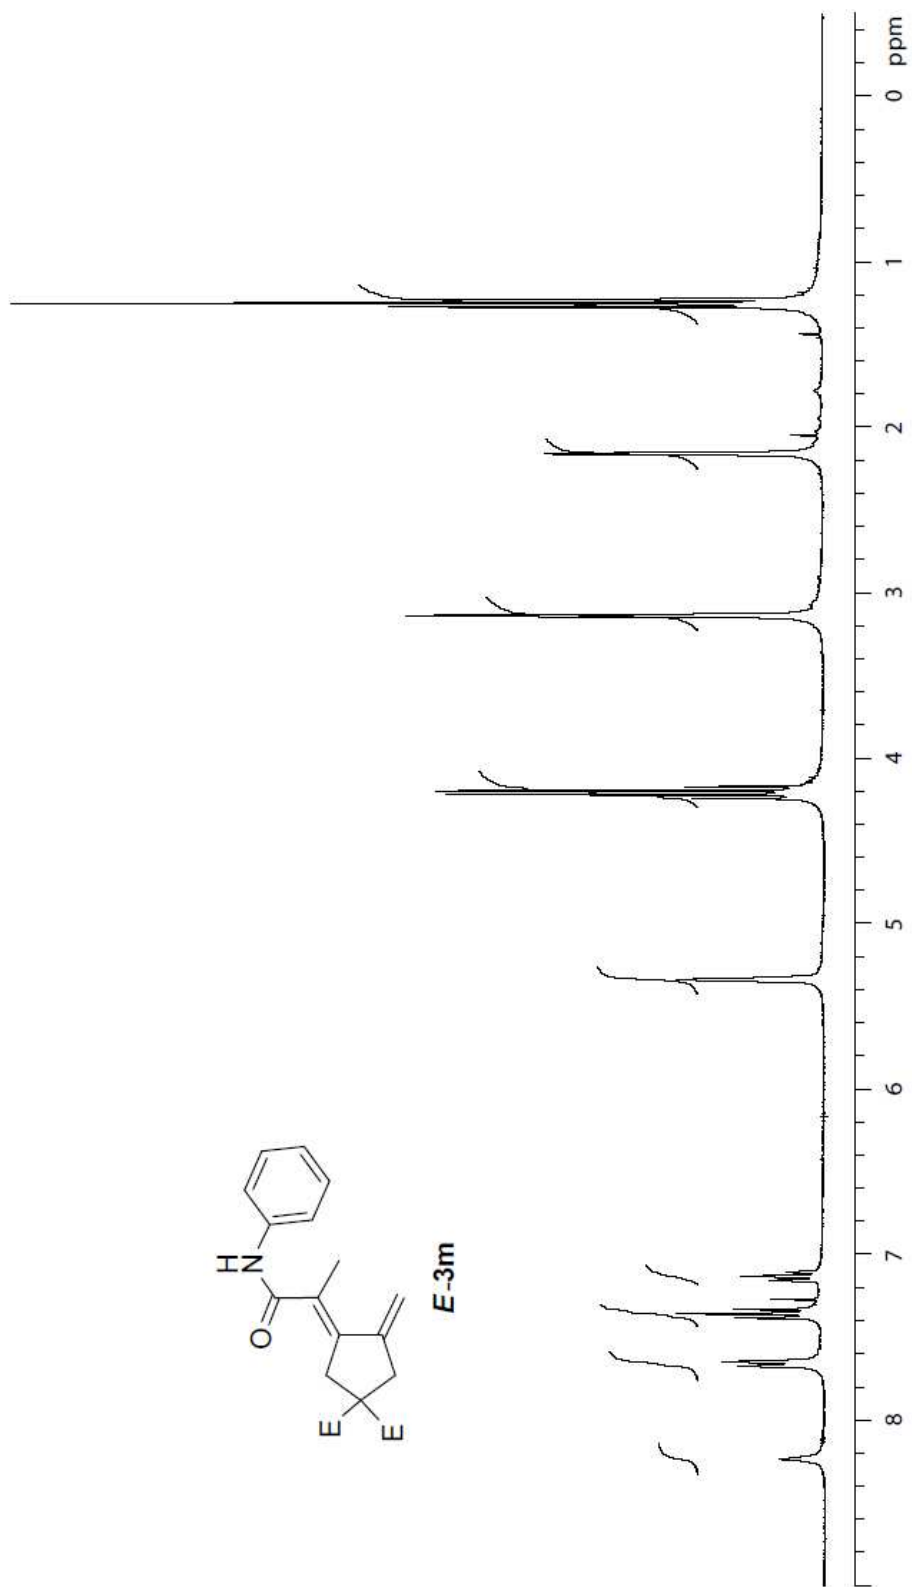

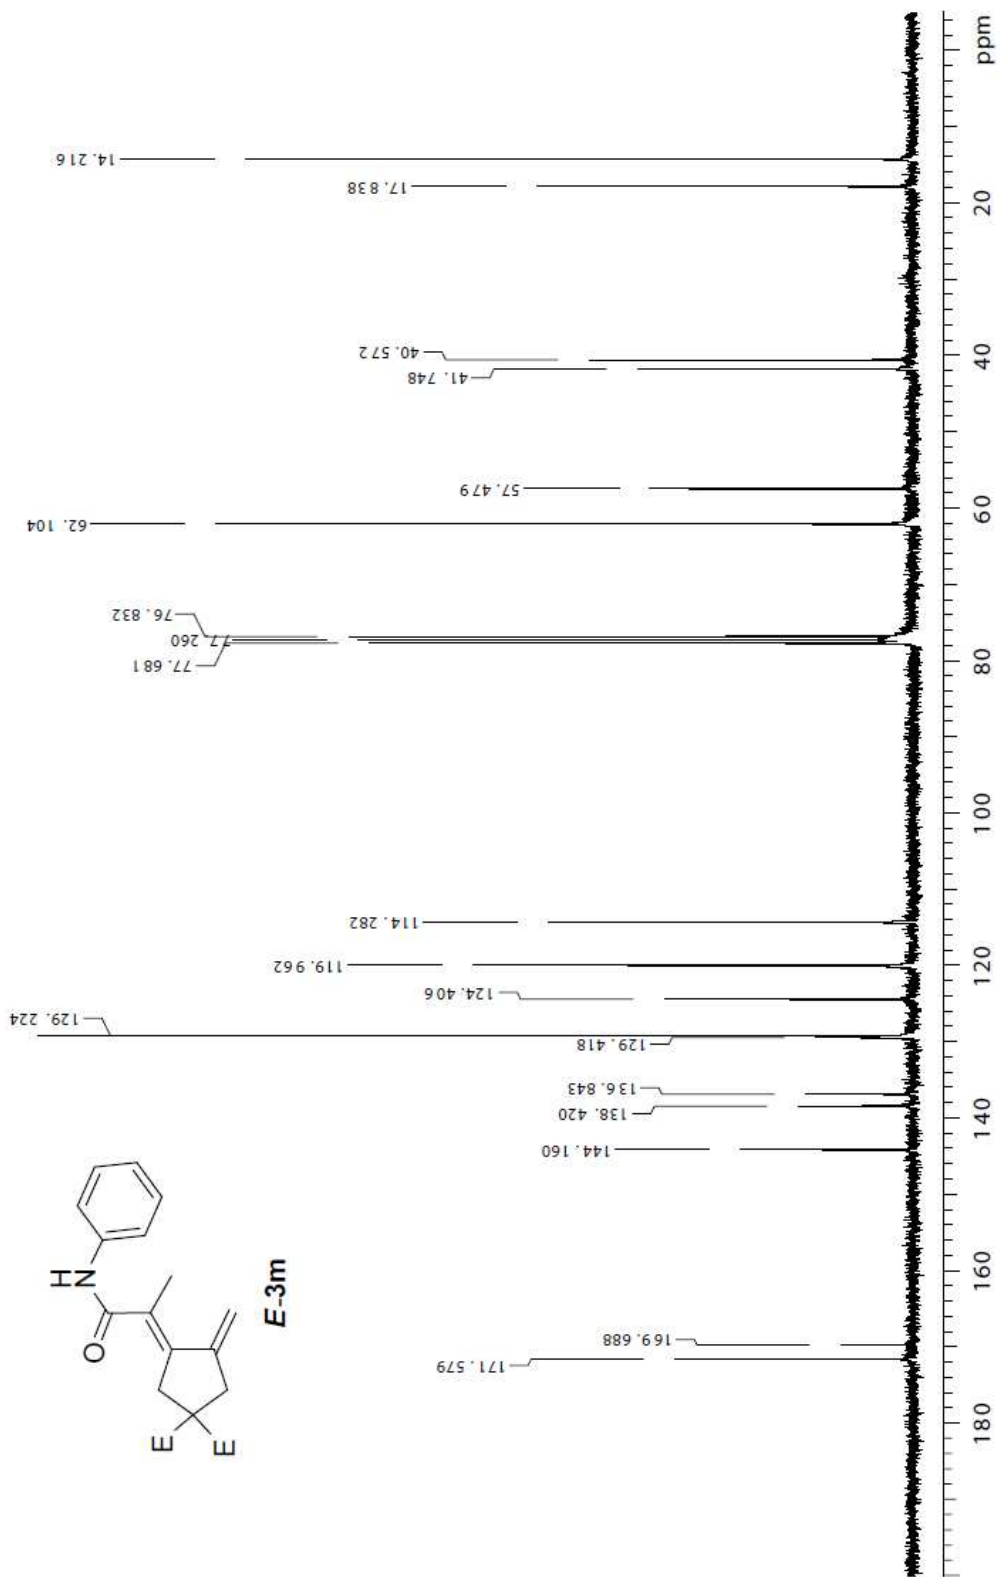

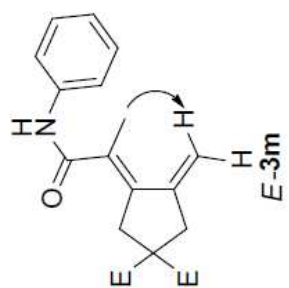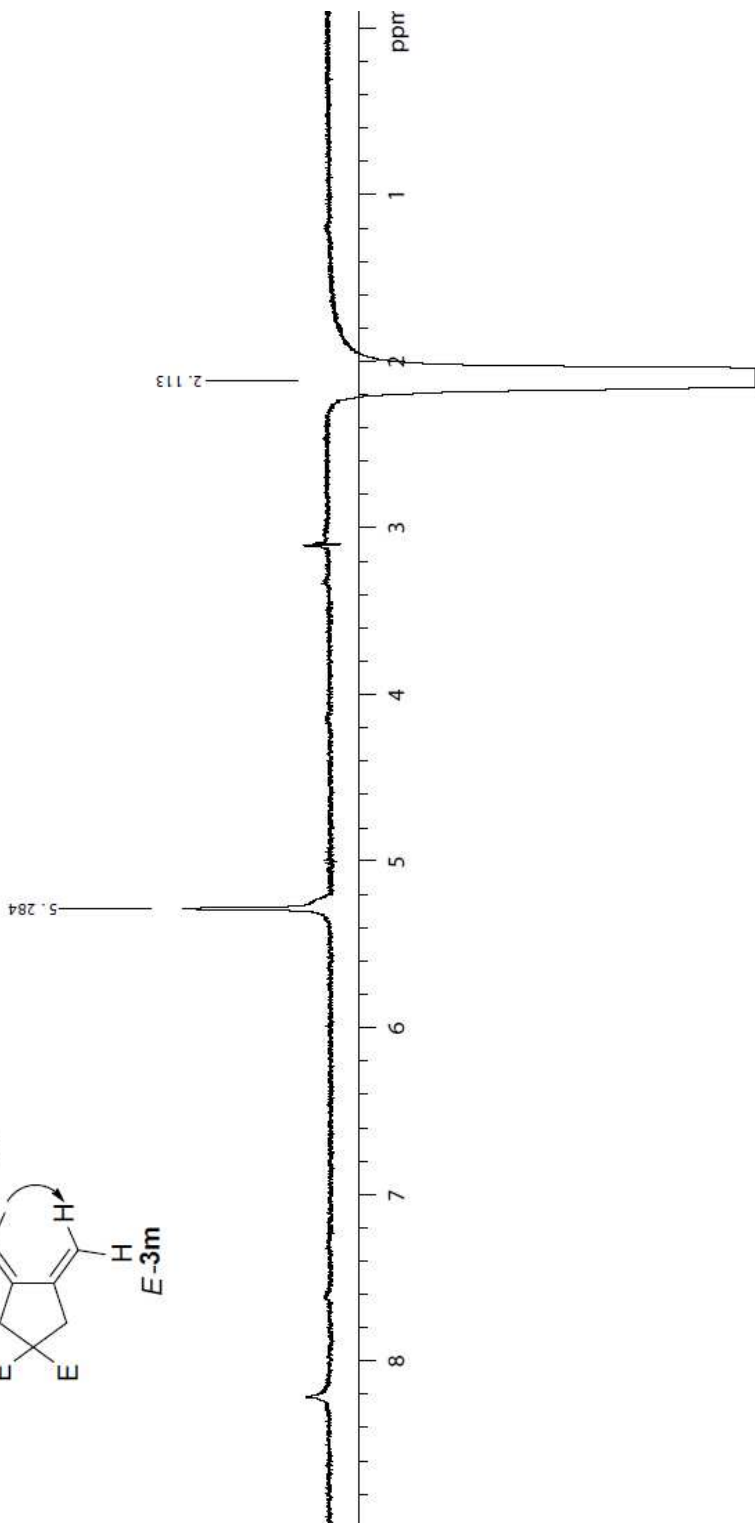

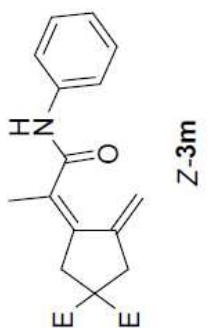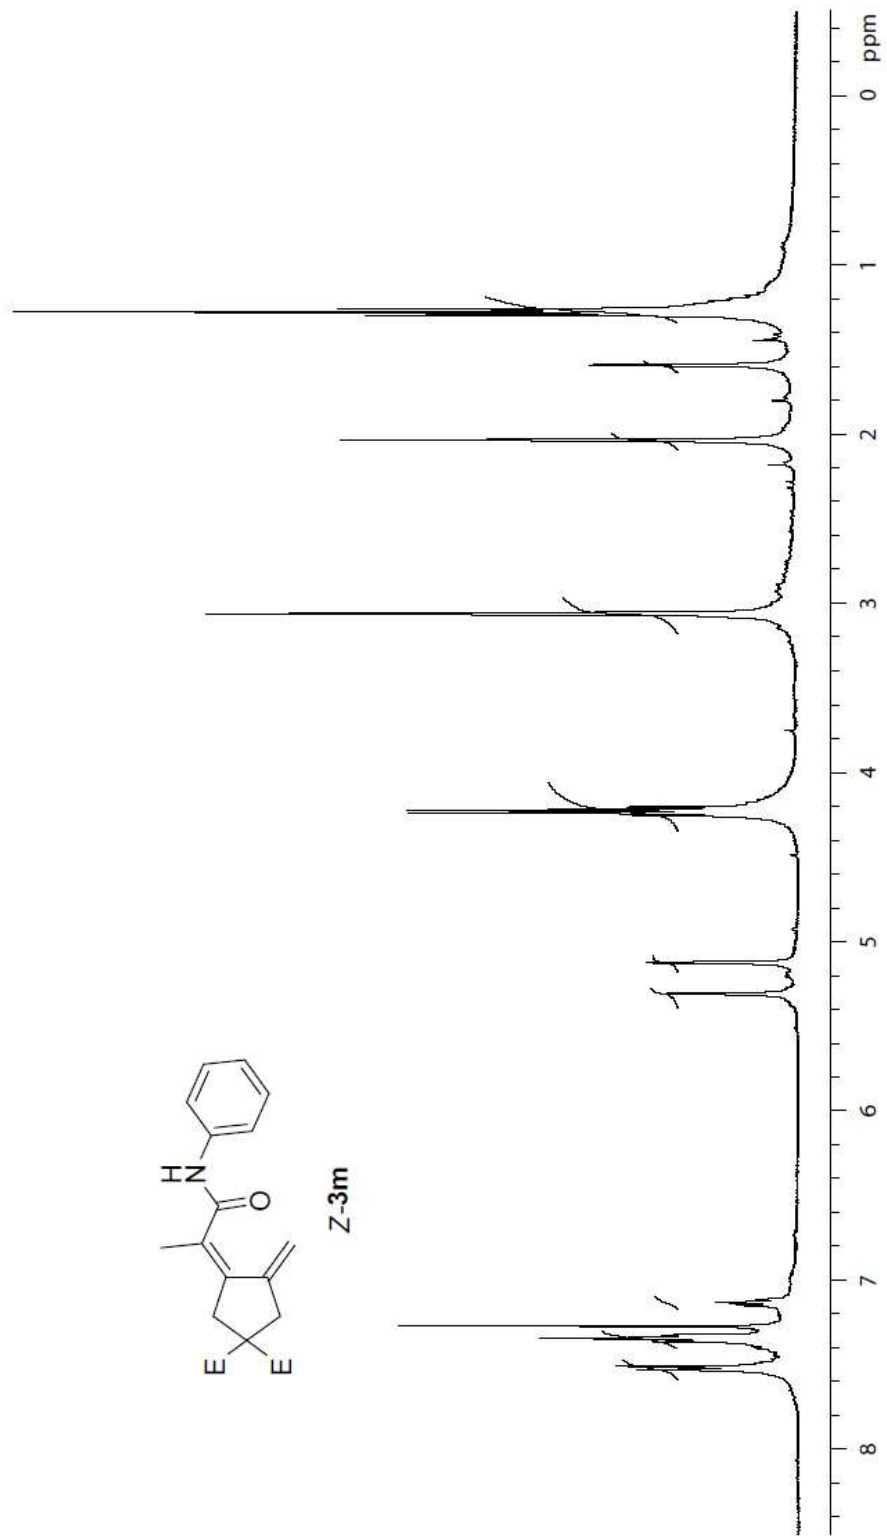

8D-88P1-003 middle spot major isomer enyno of malonate + PANCO

Pulse Sequence: sZpul

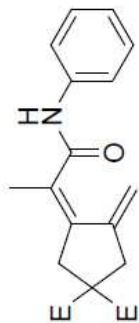

Z-3m

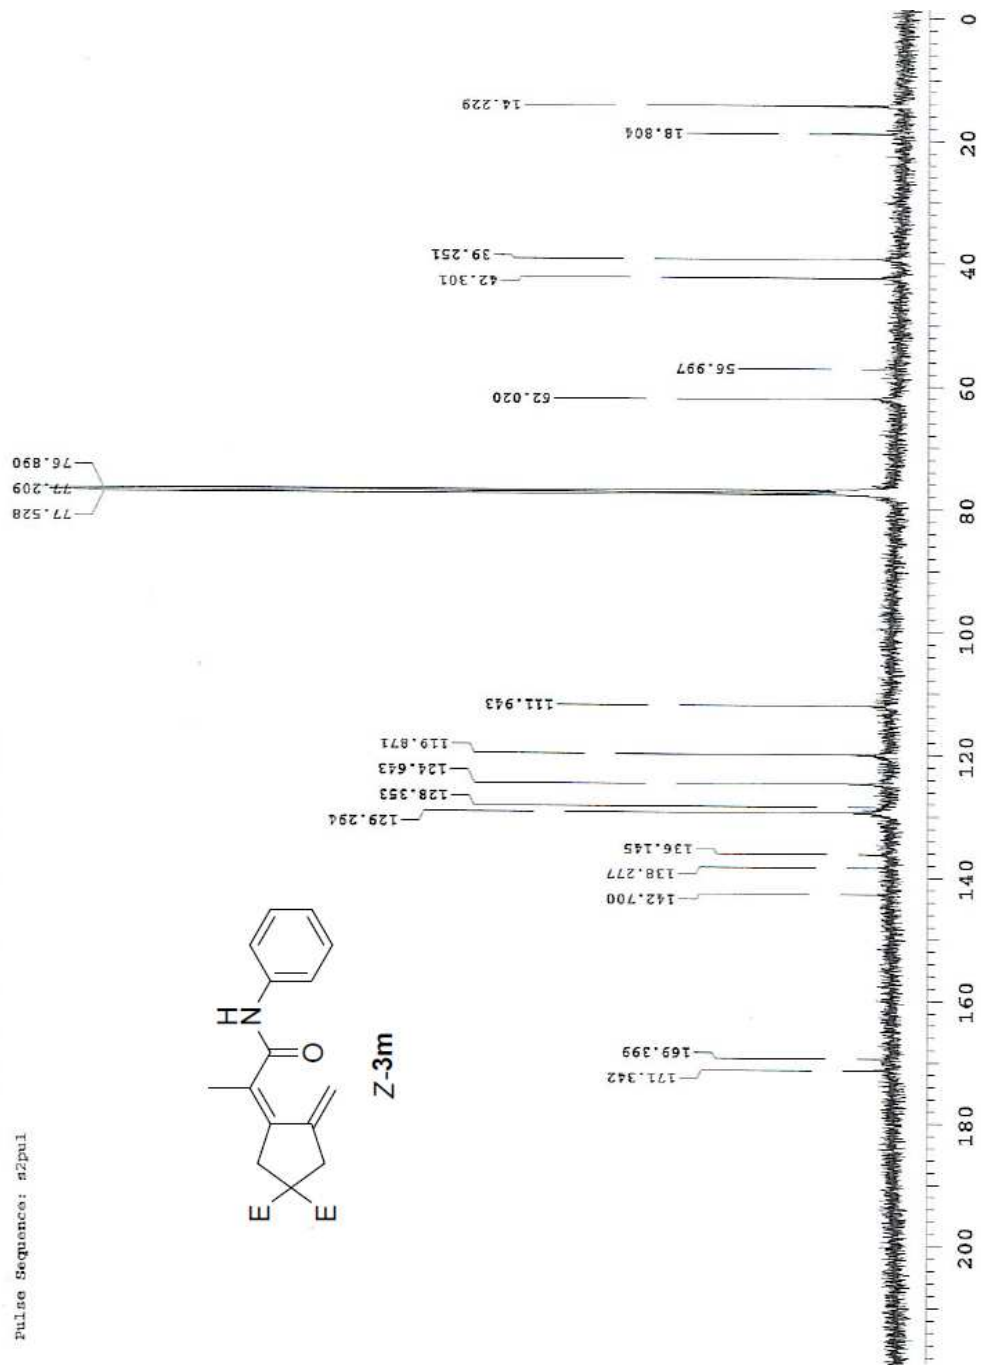



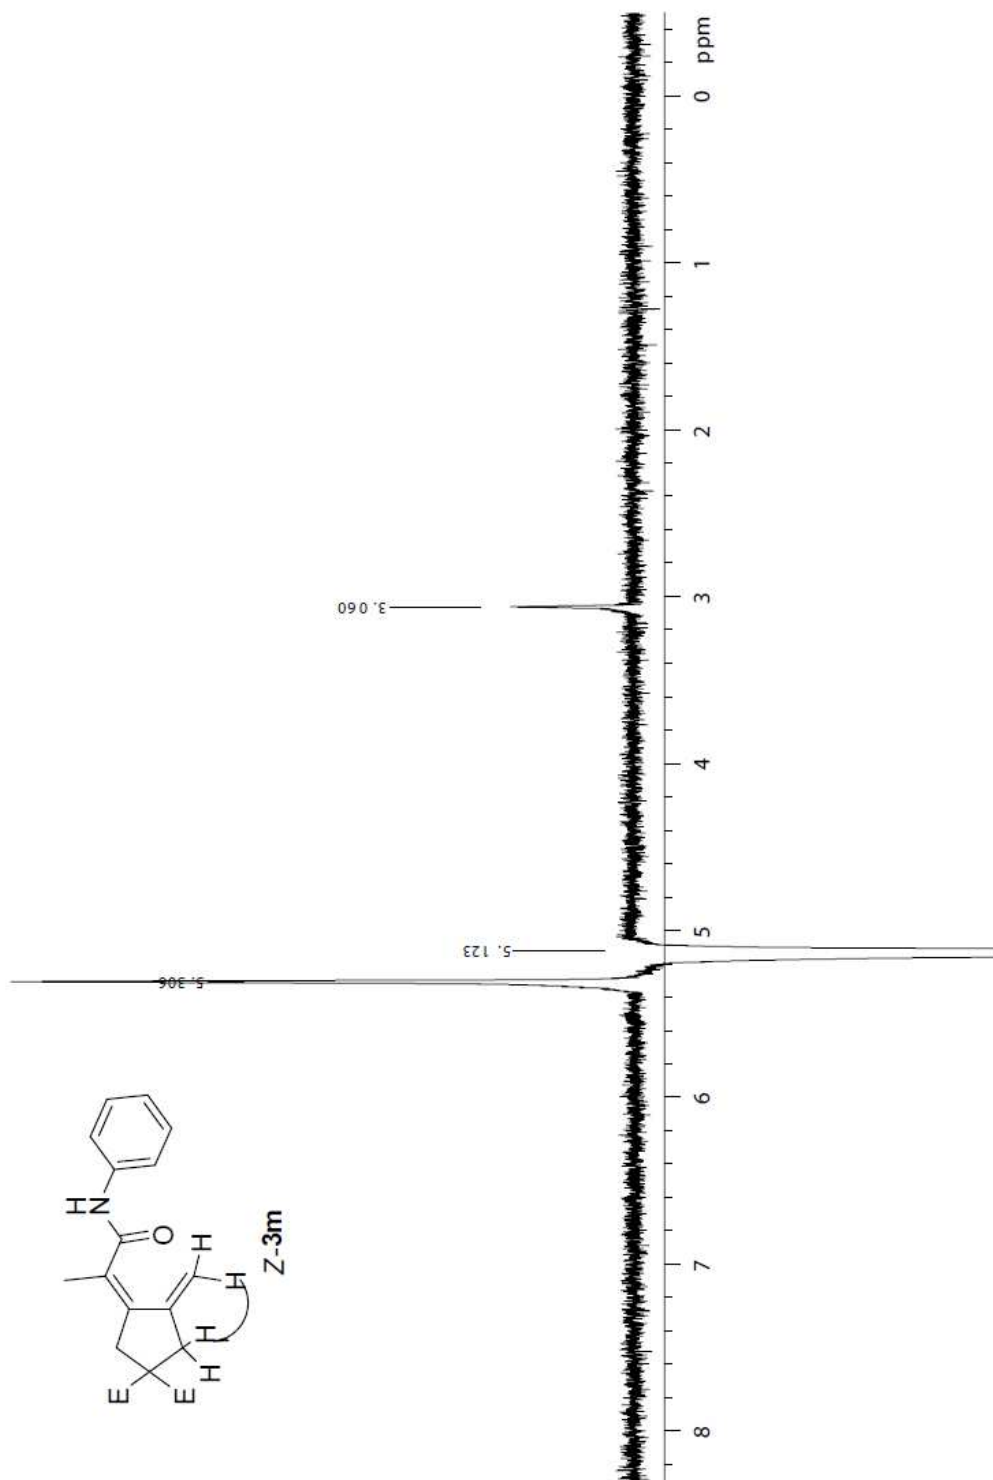

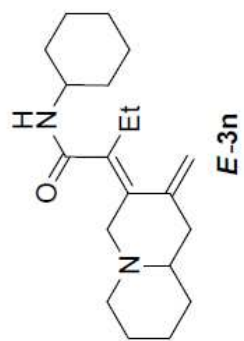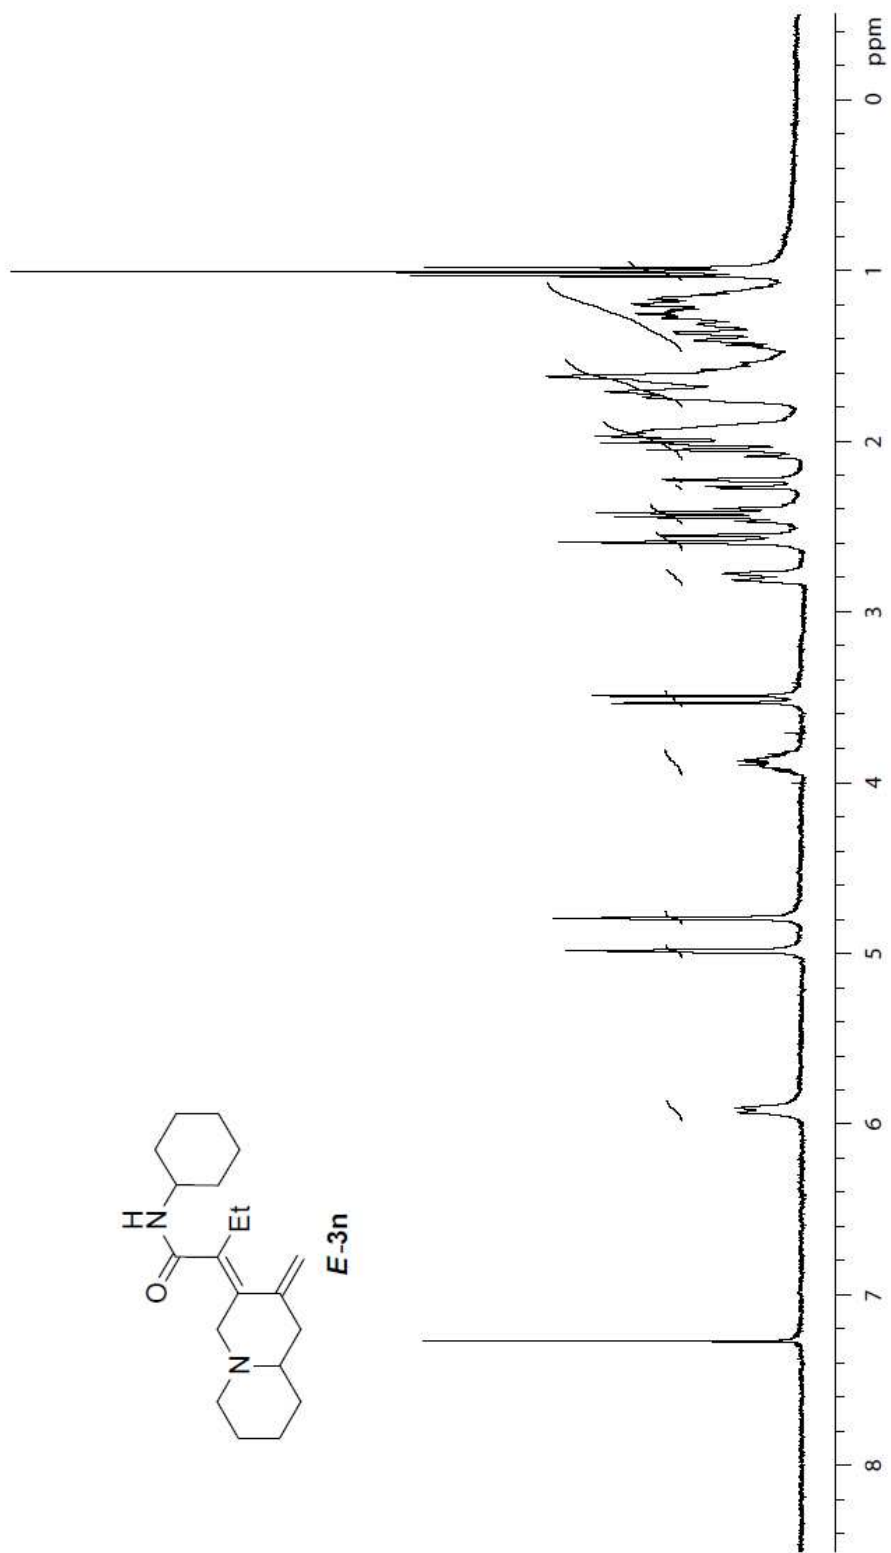

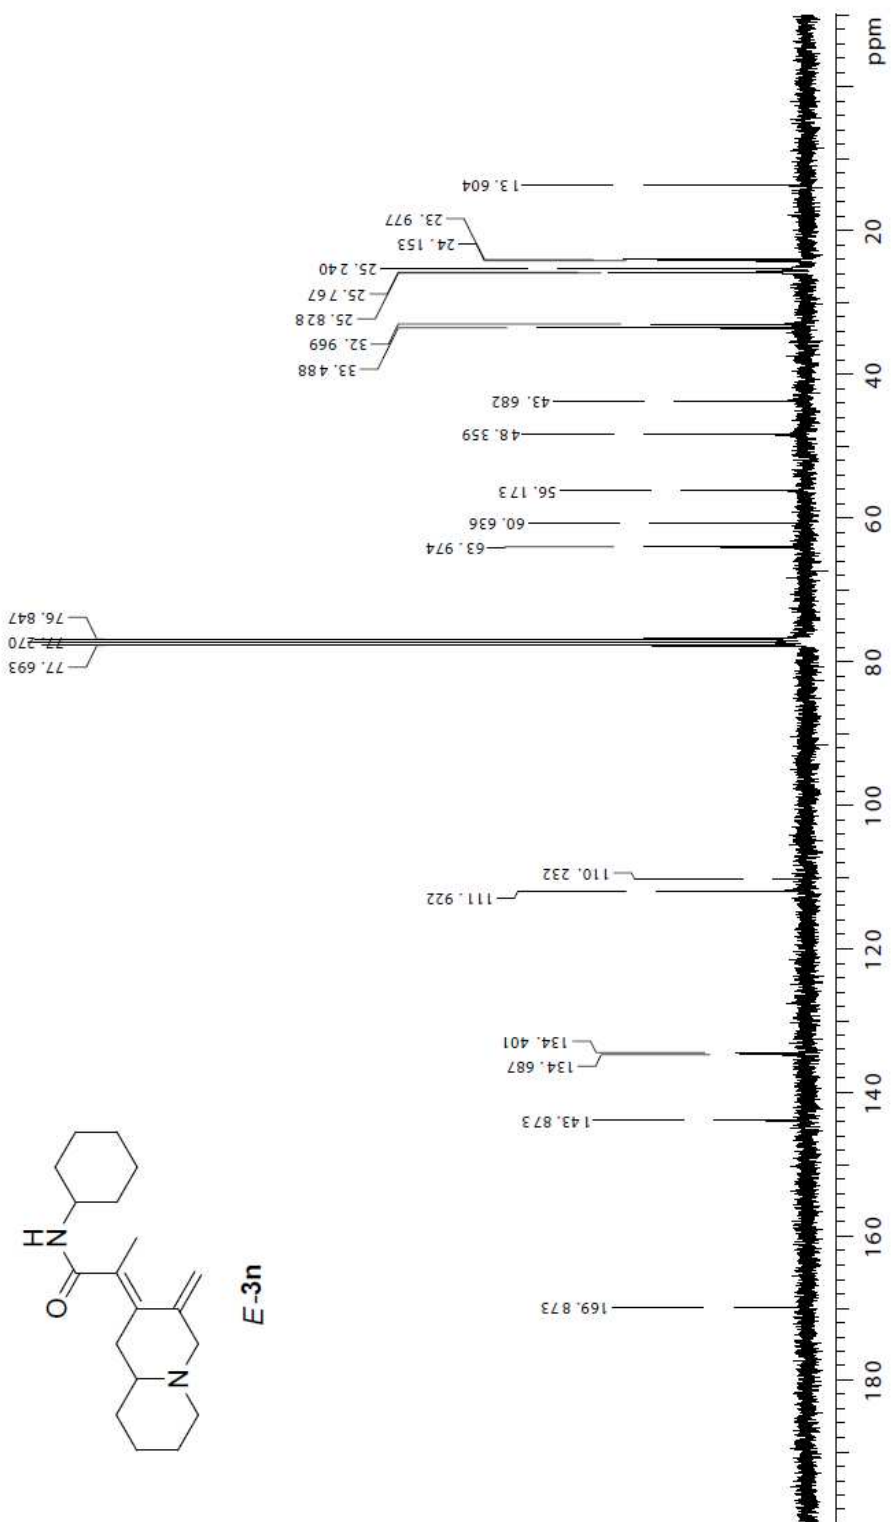

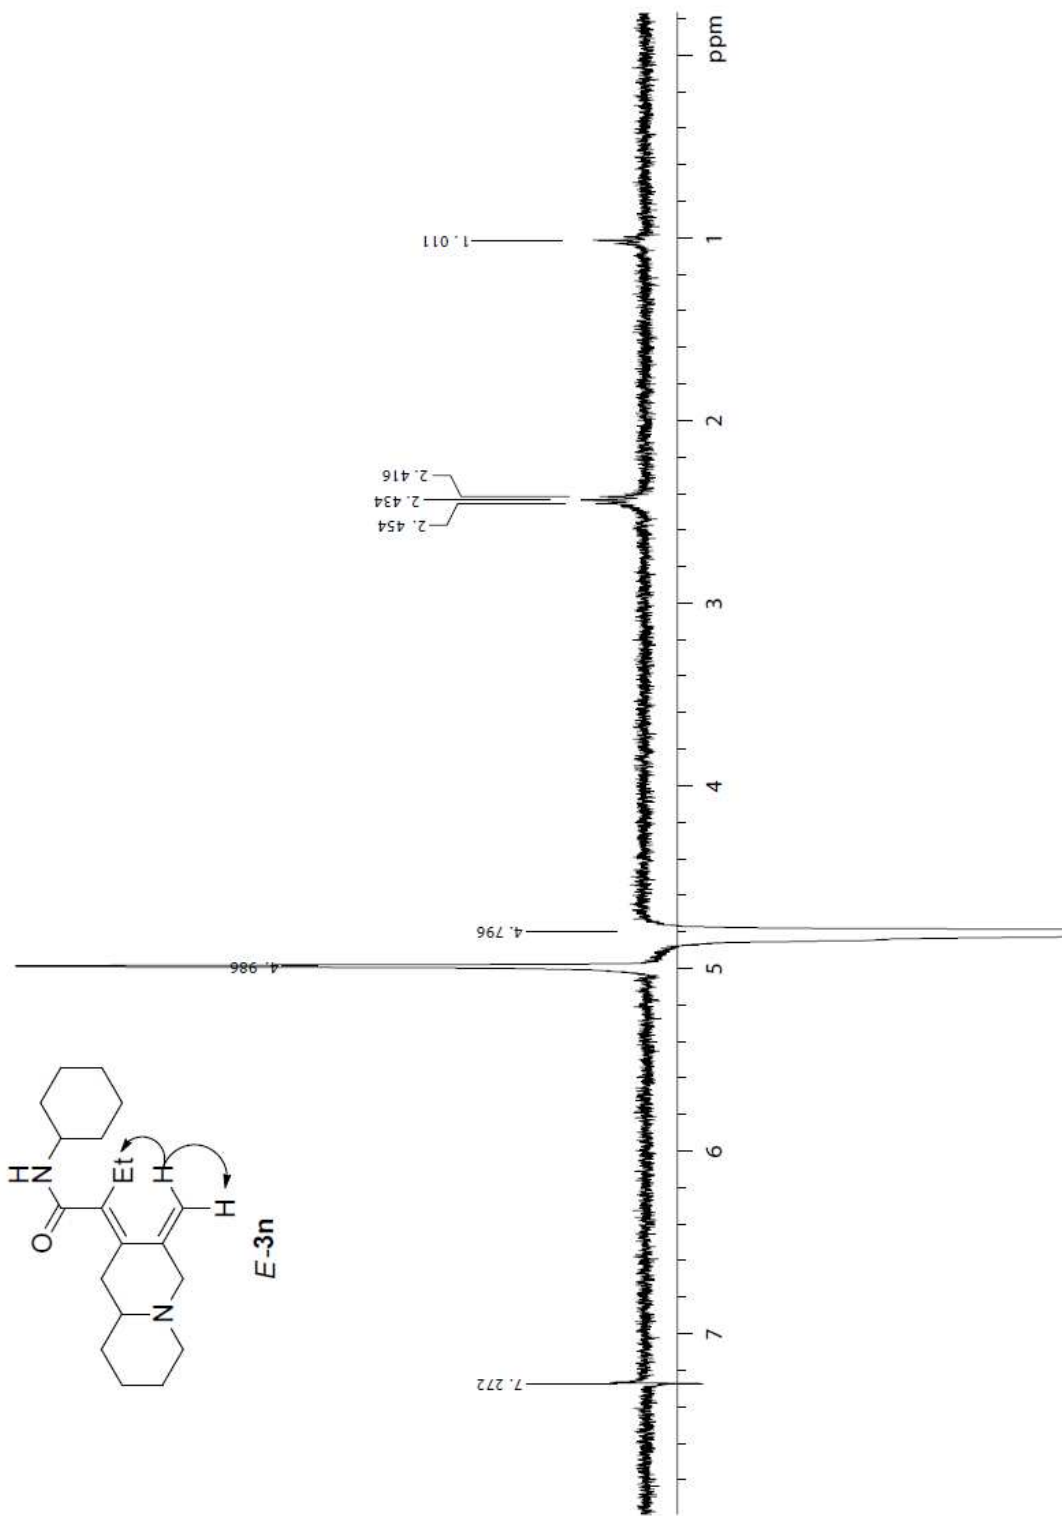

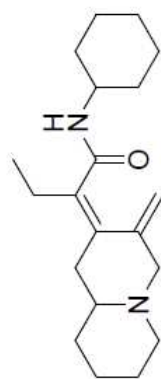

Z-3n

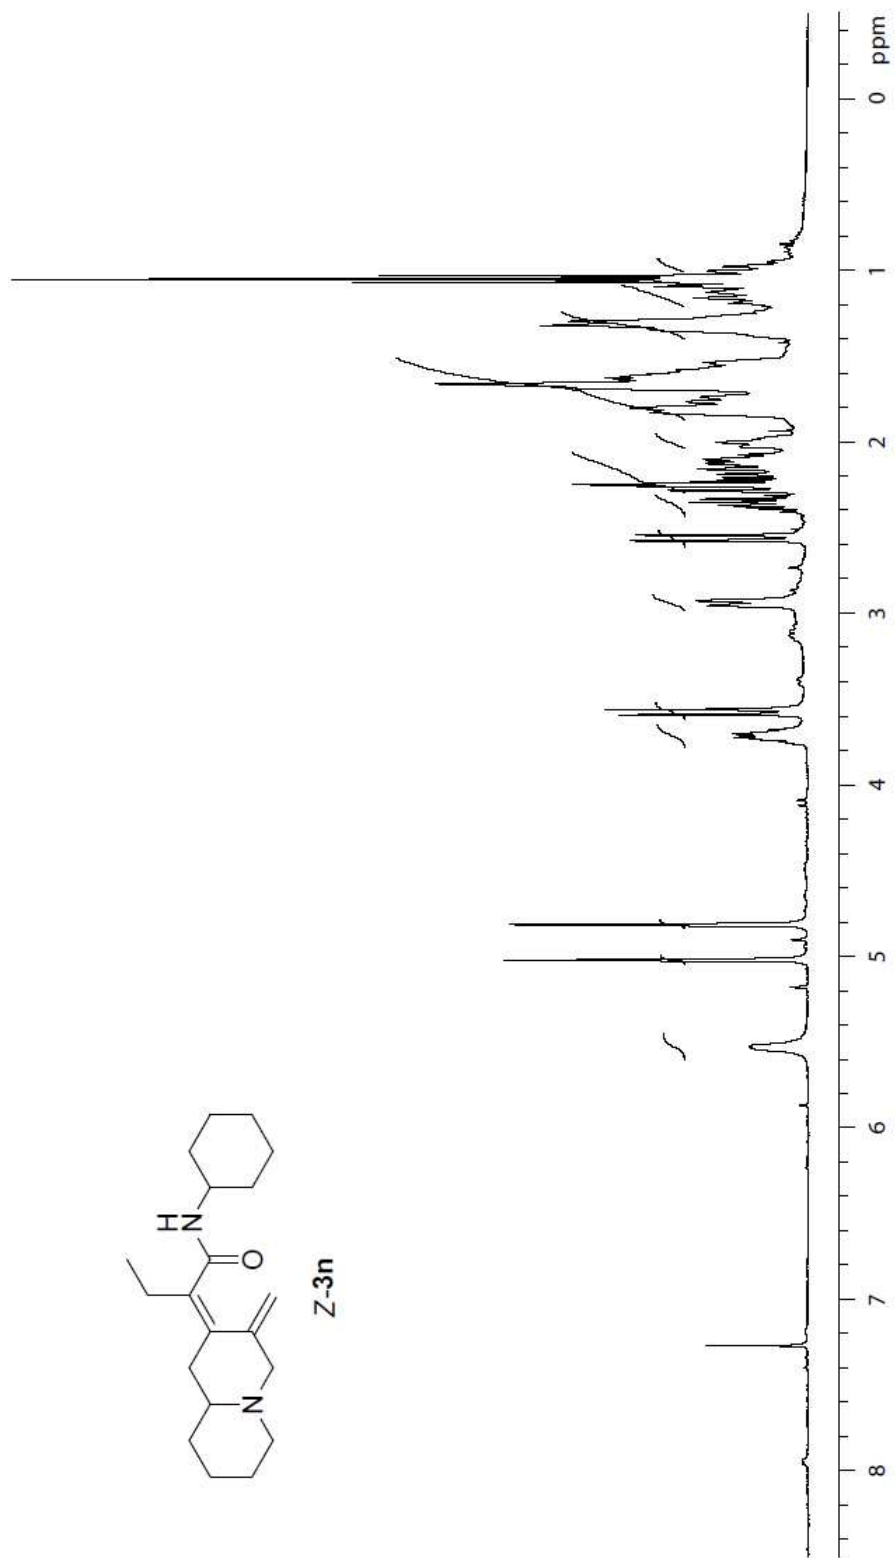

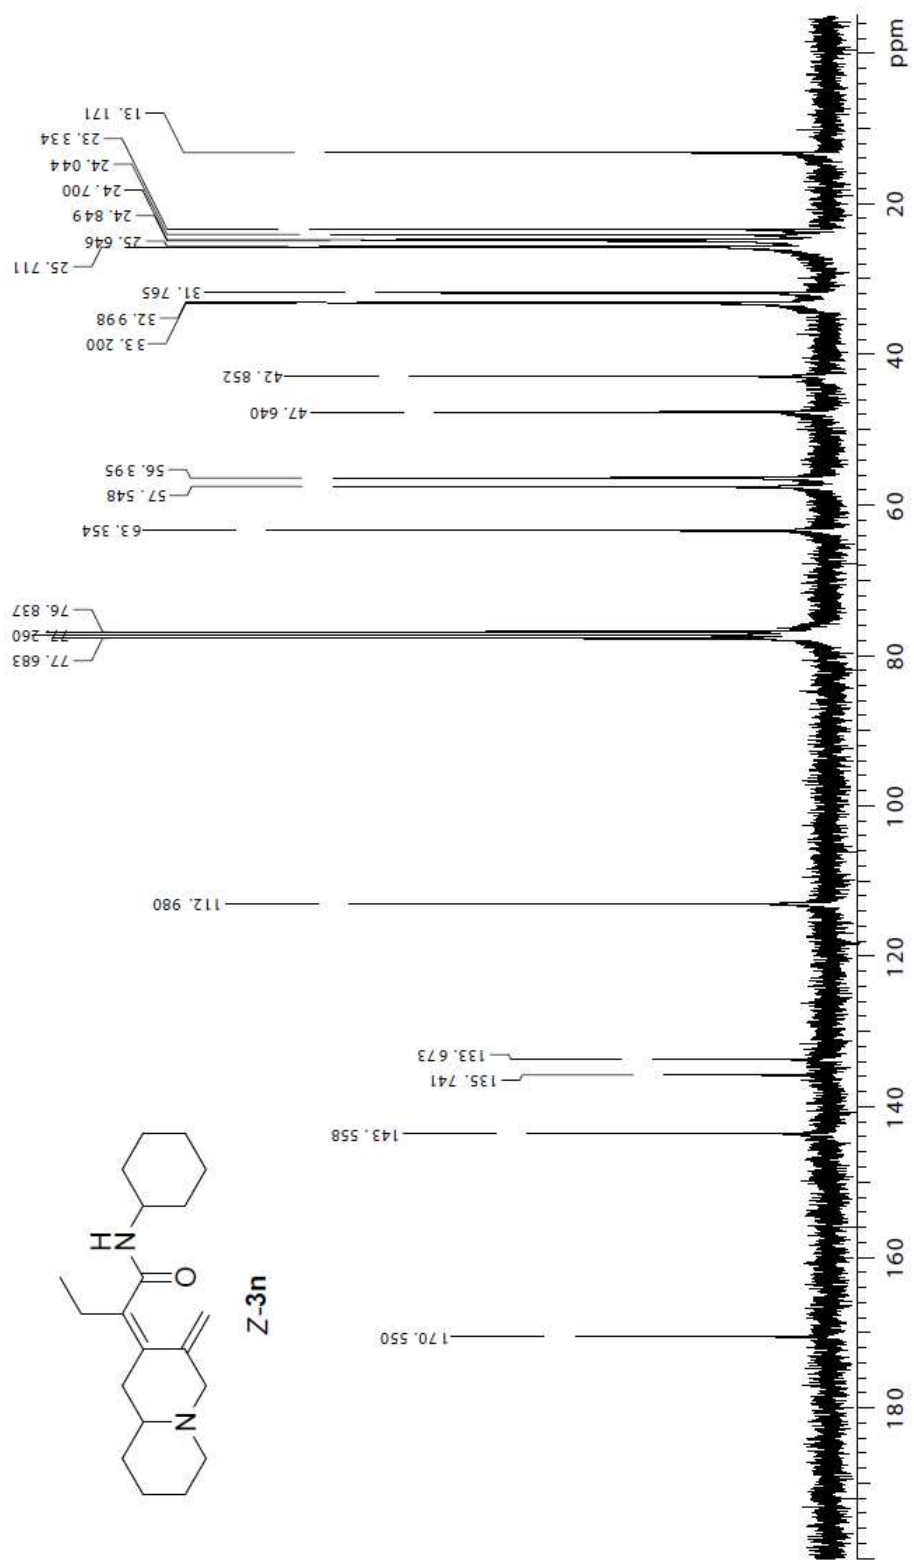

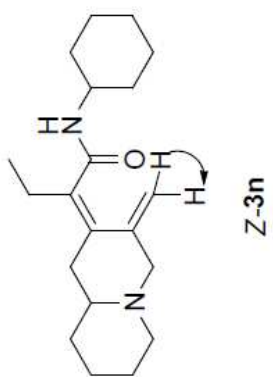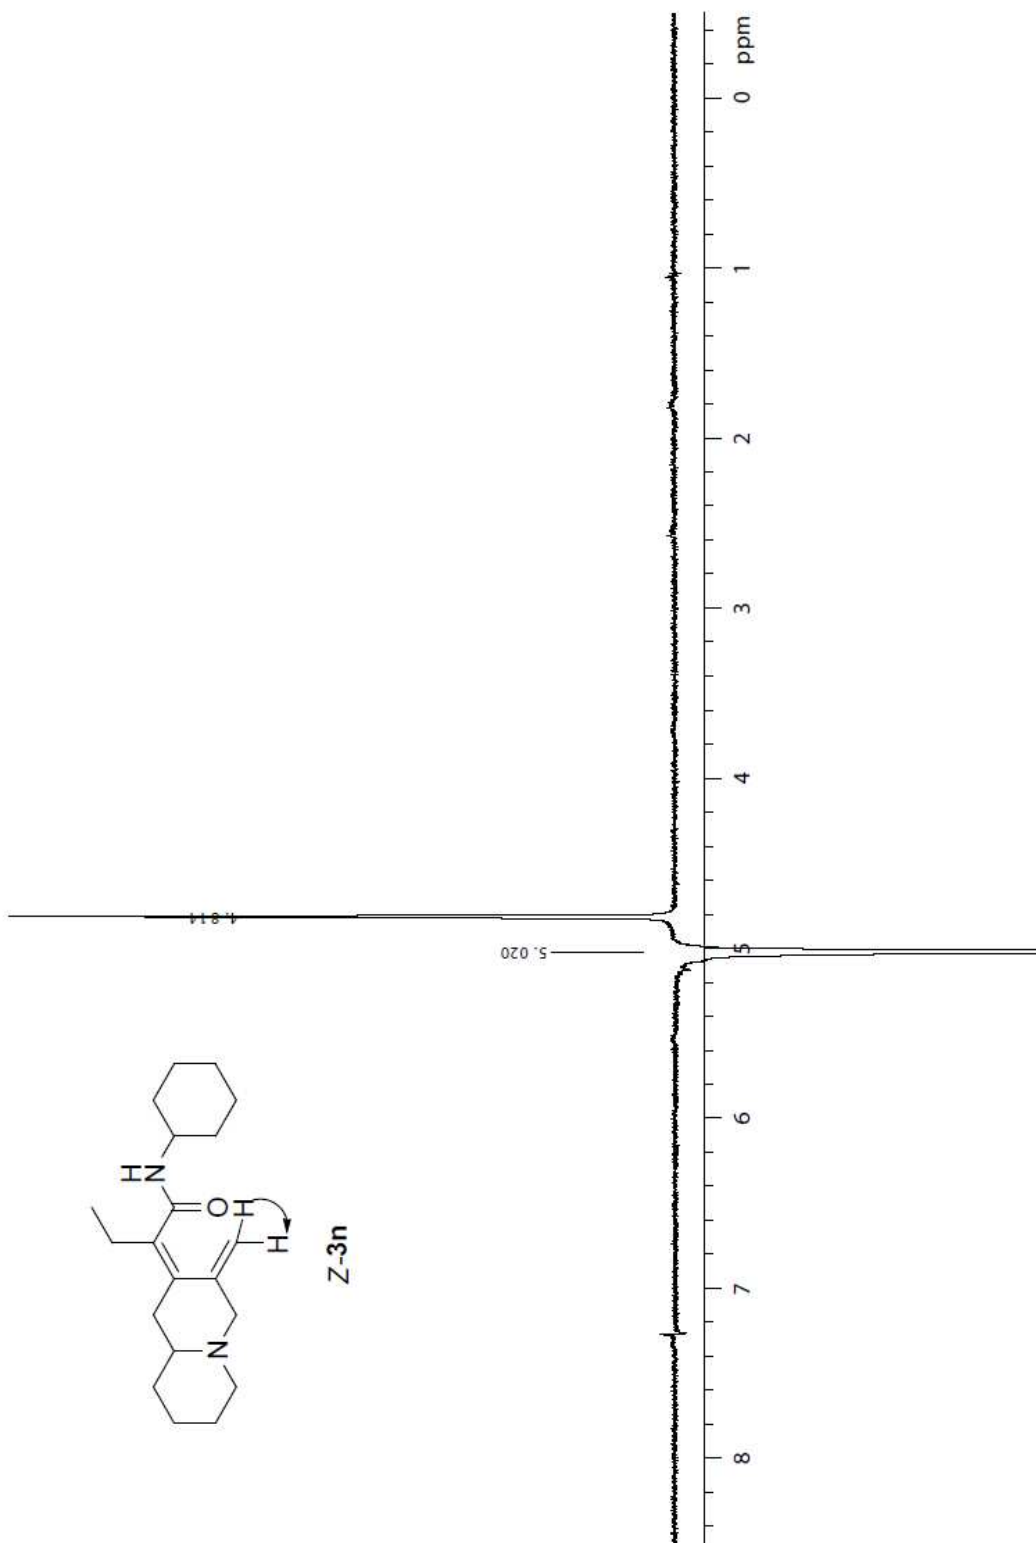

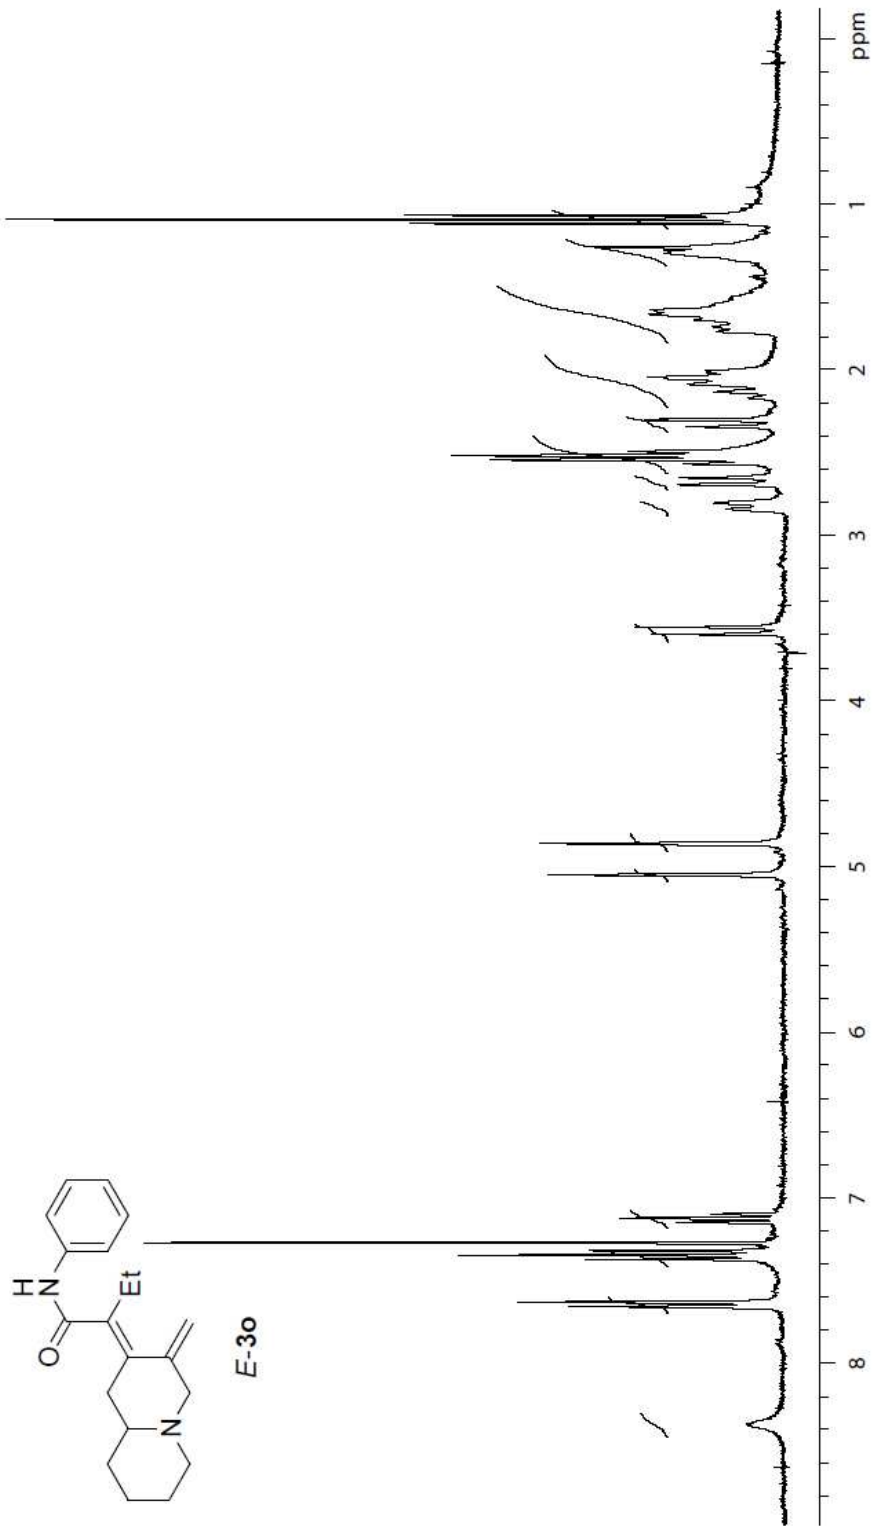



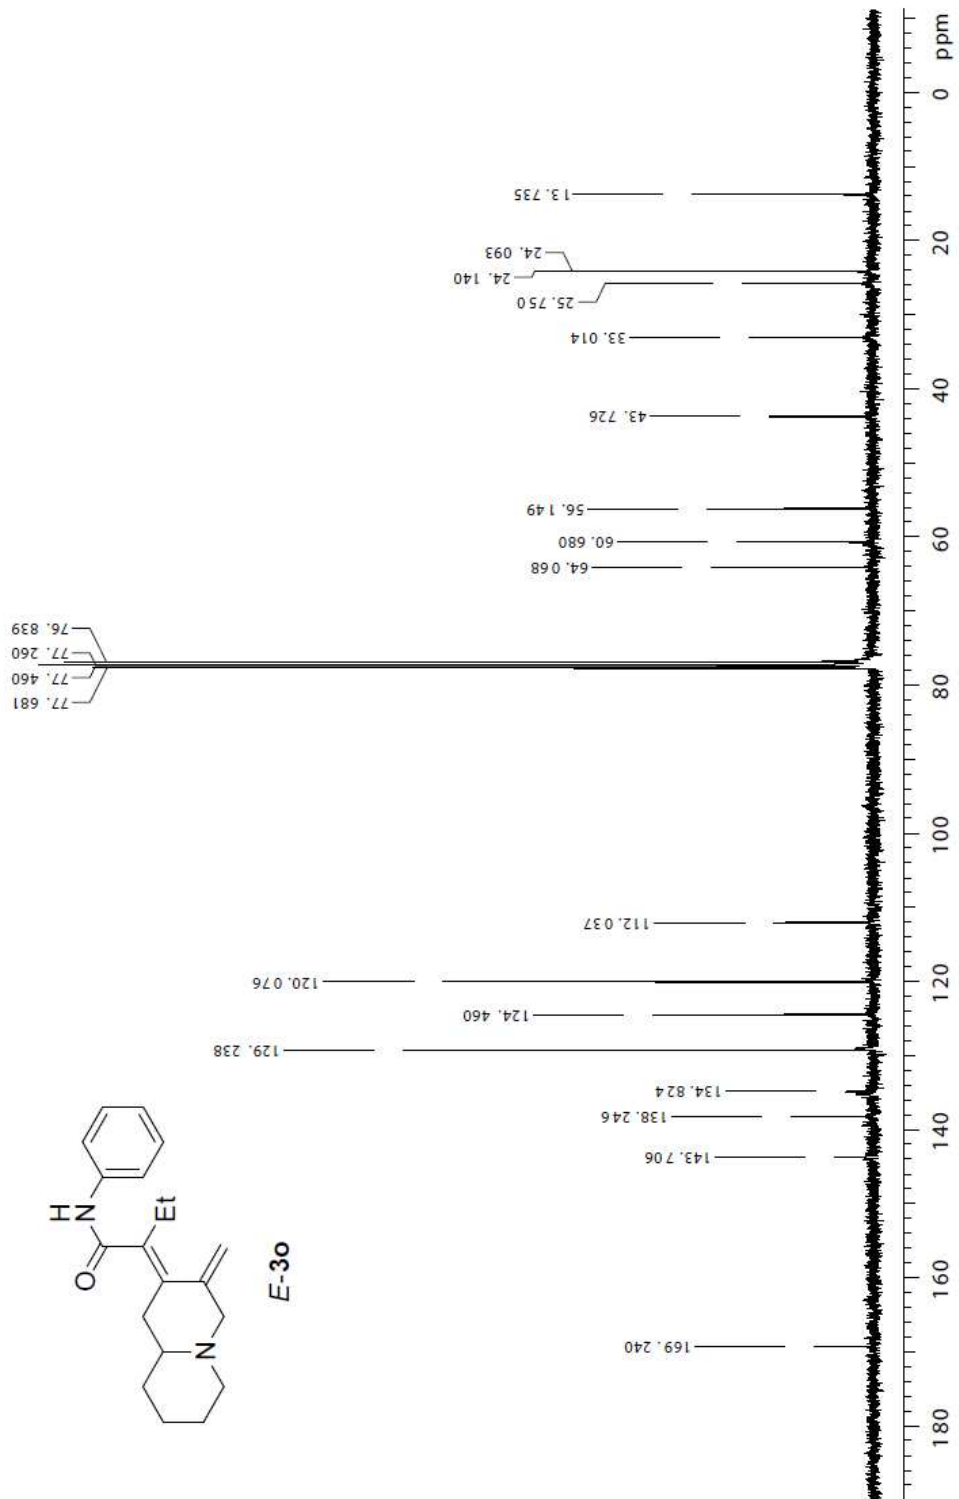

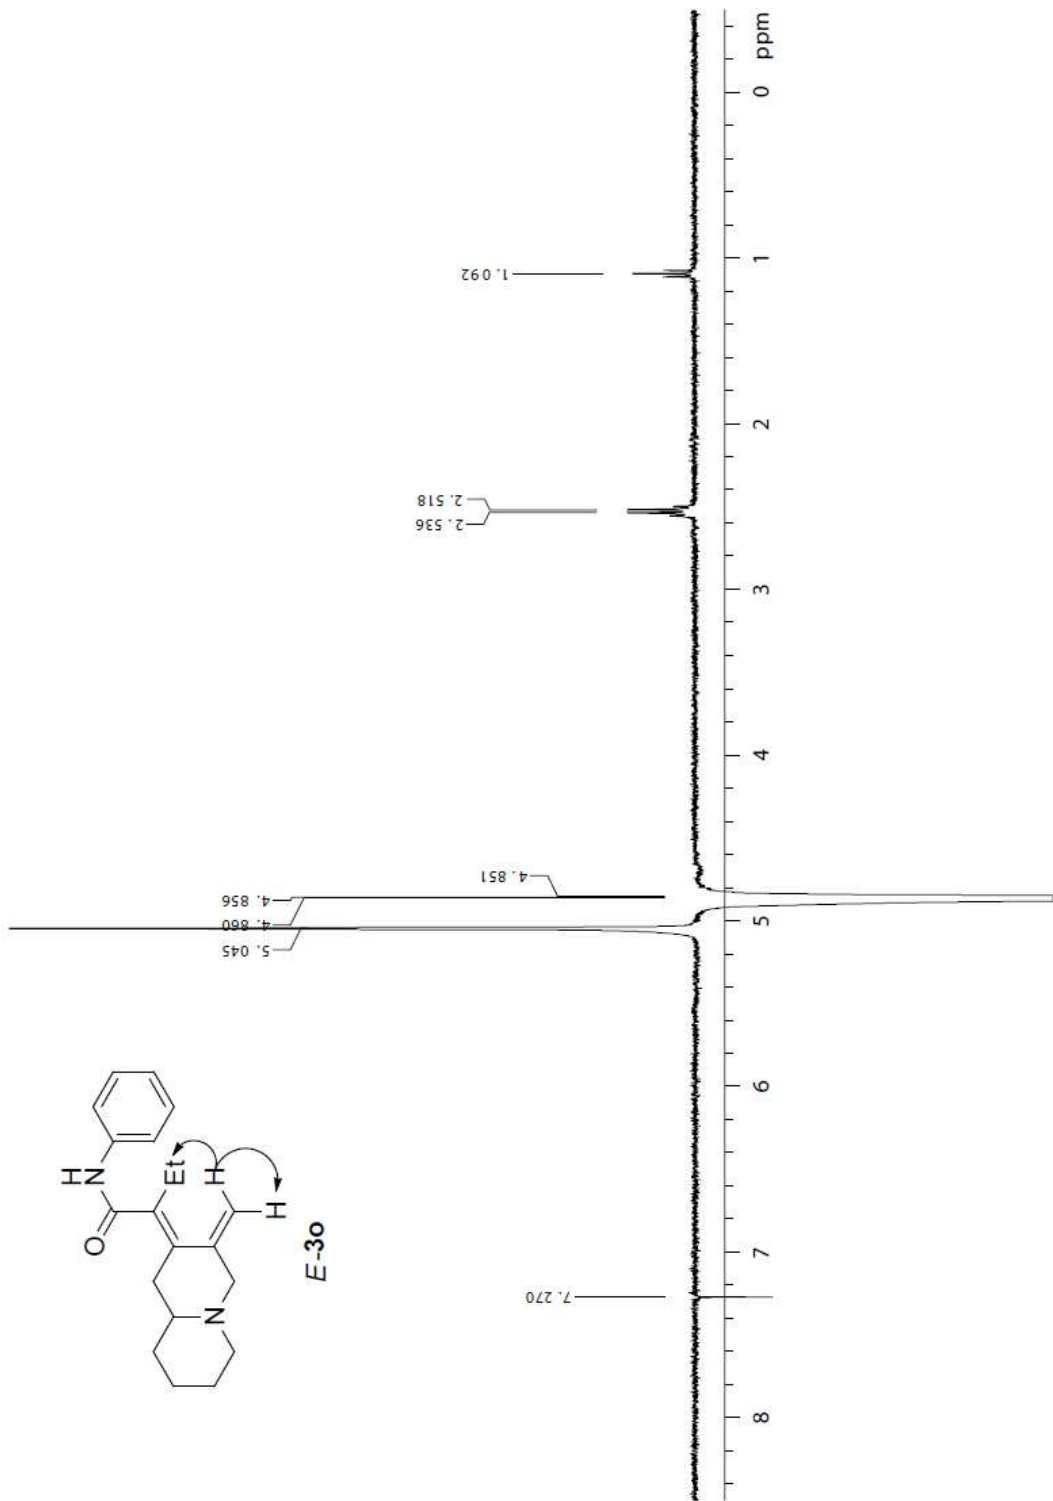

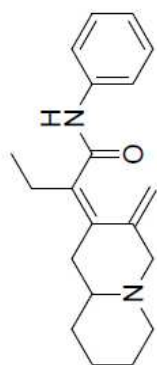

Z-3o

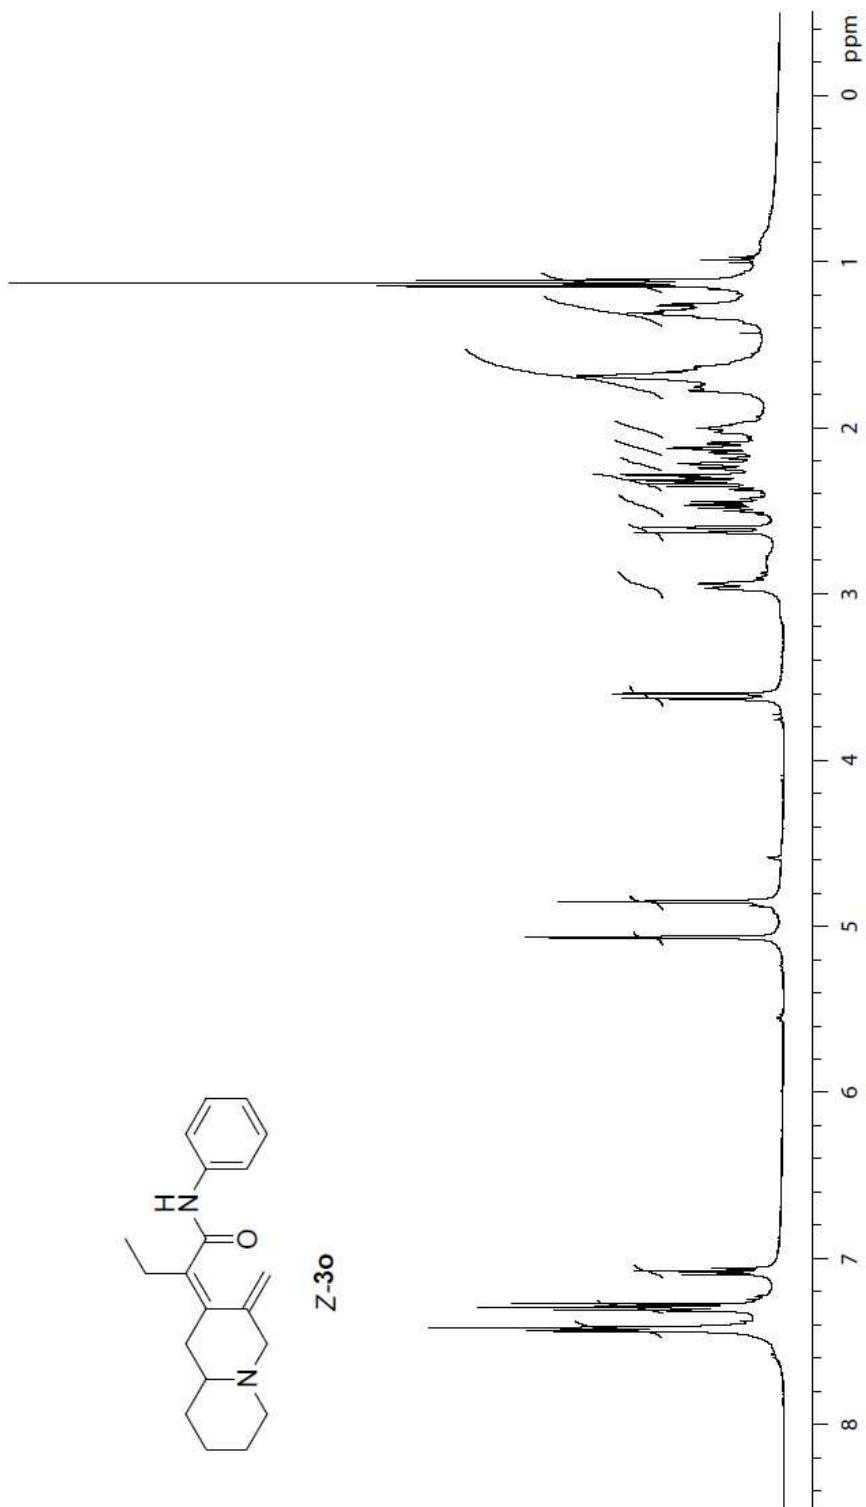

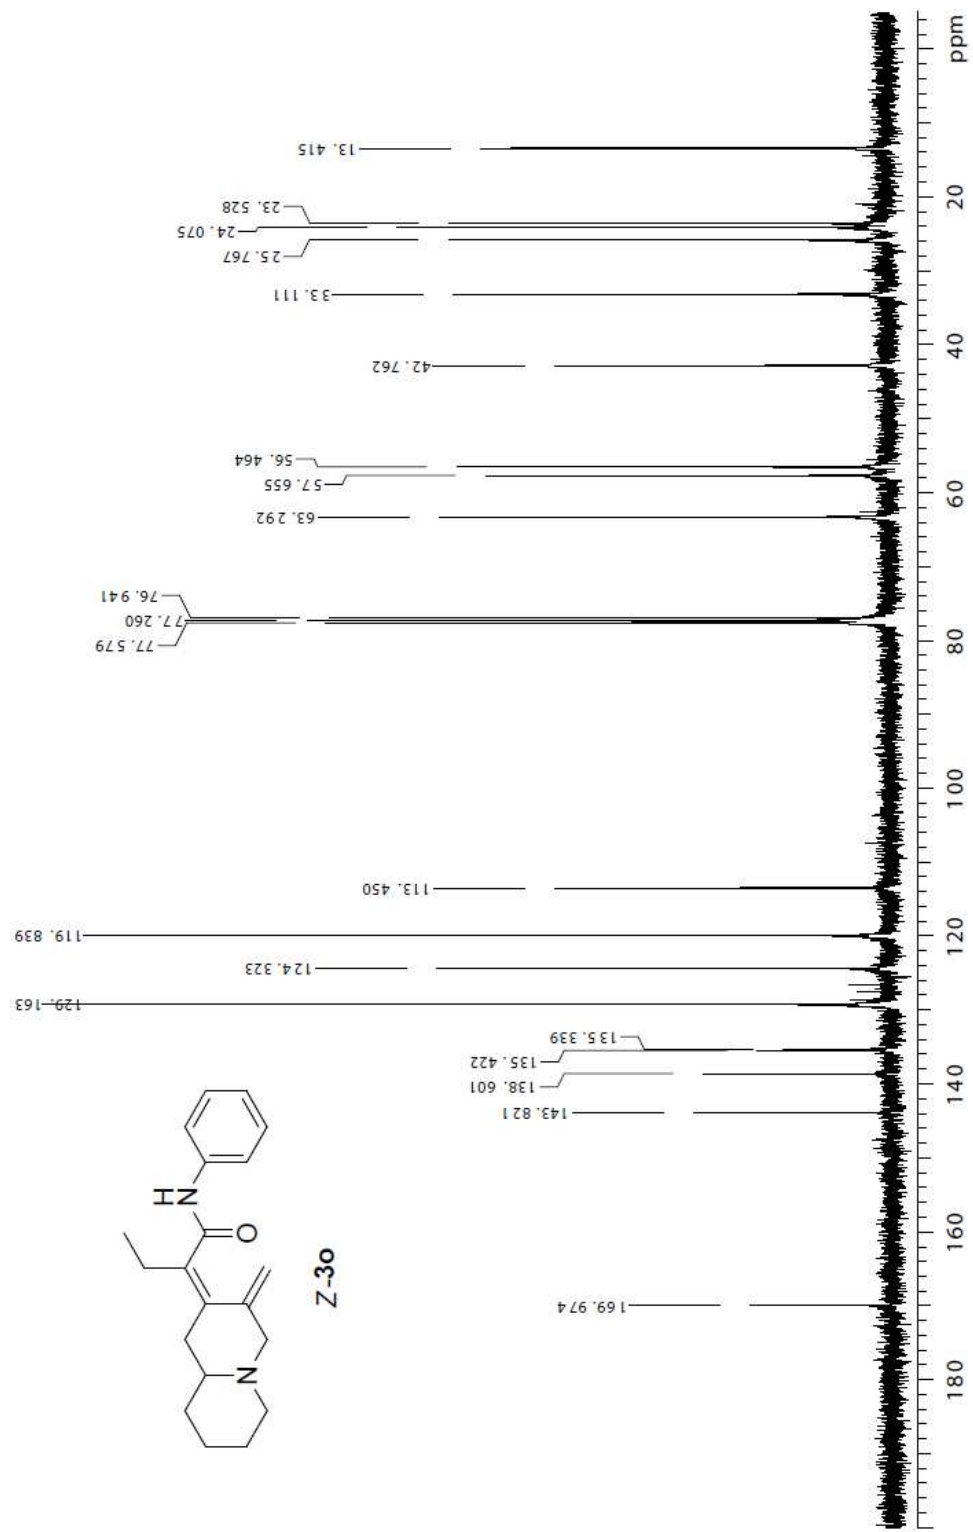

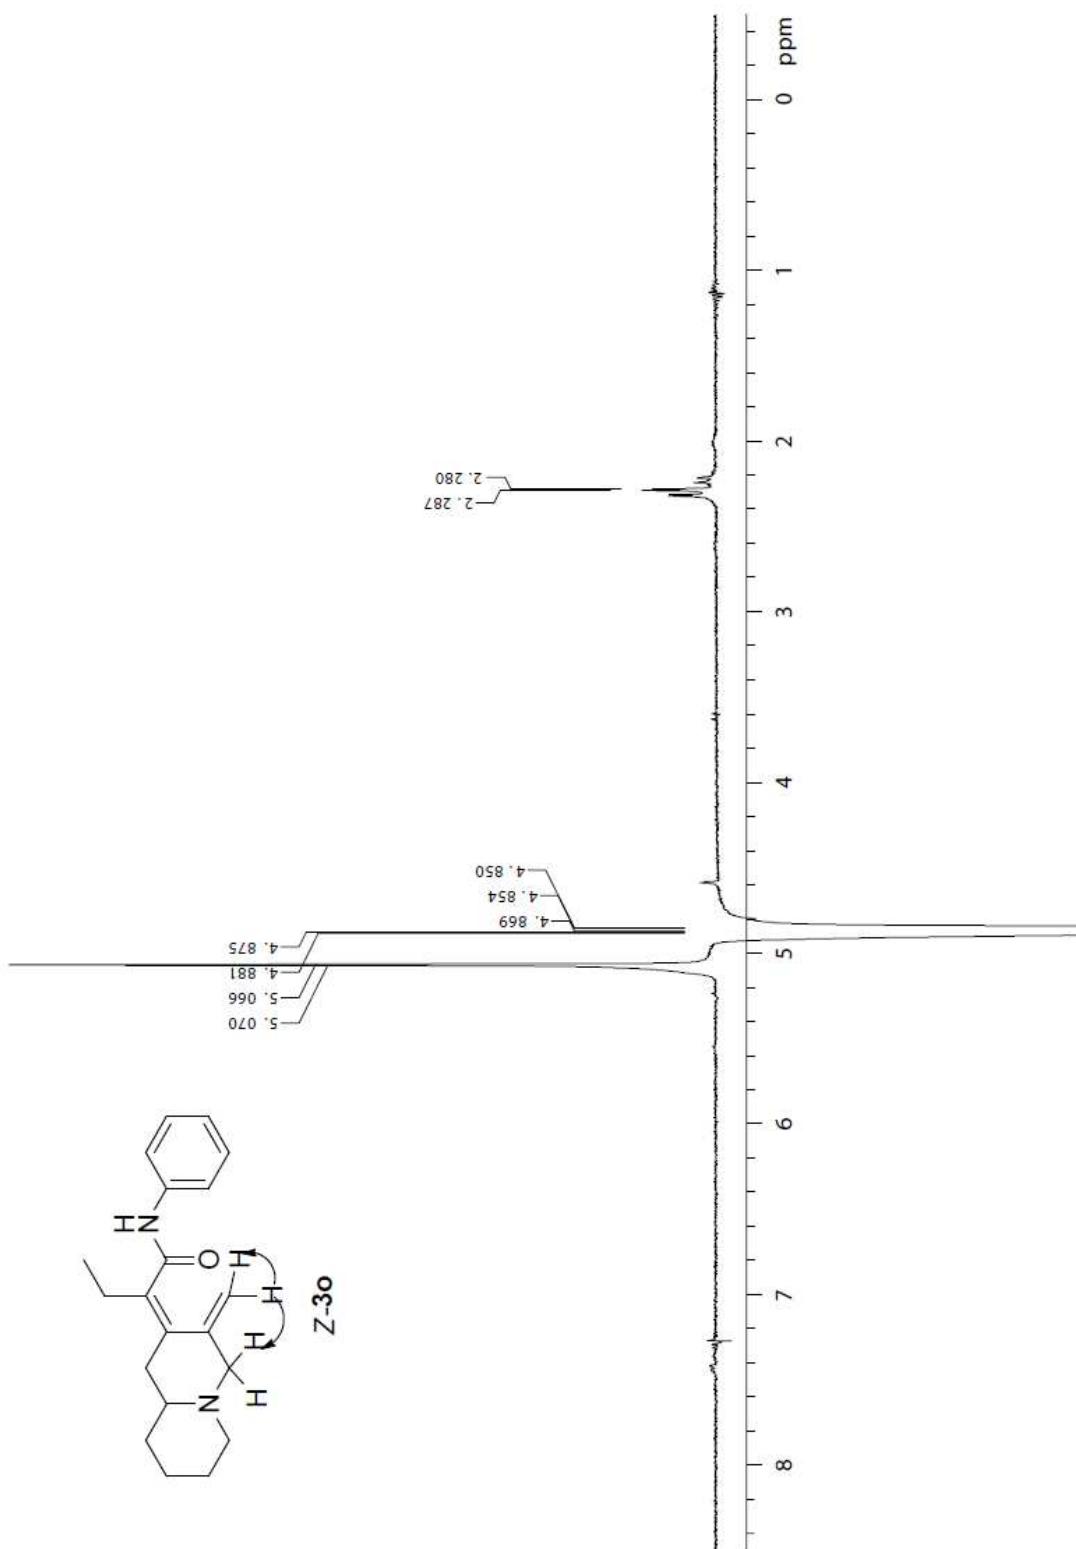

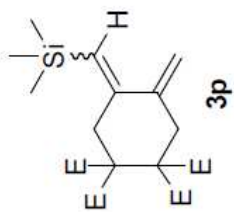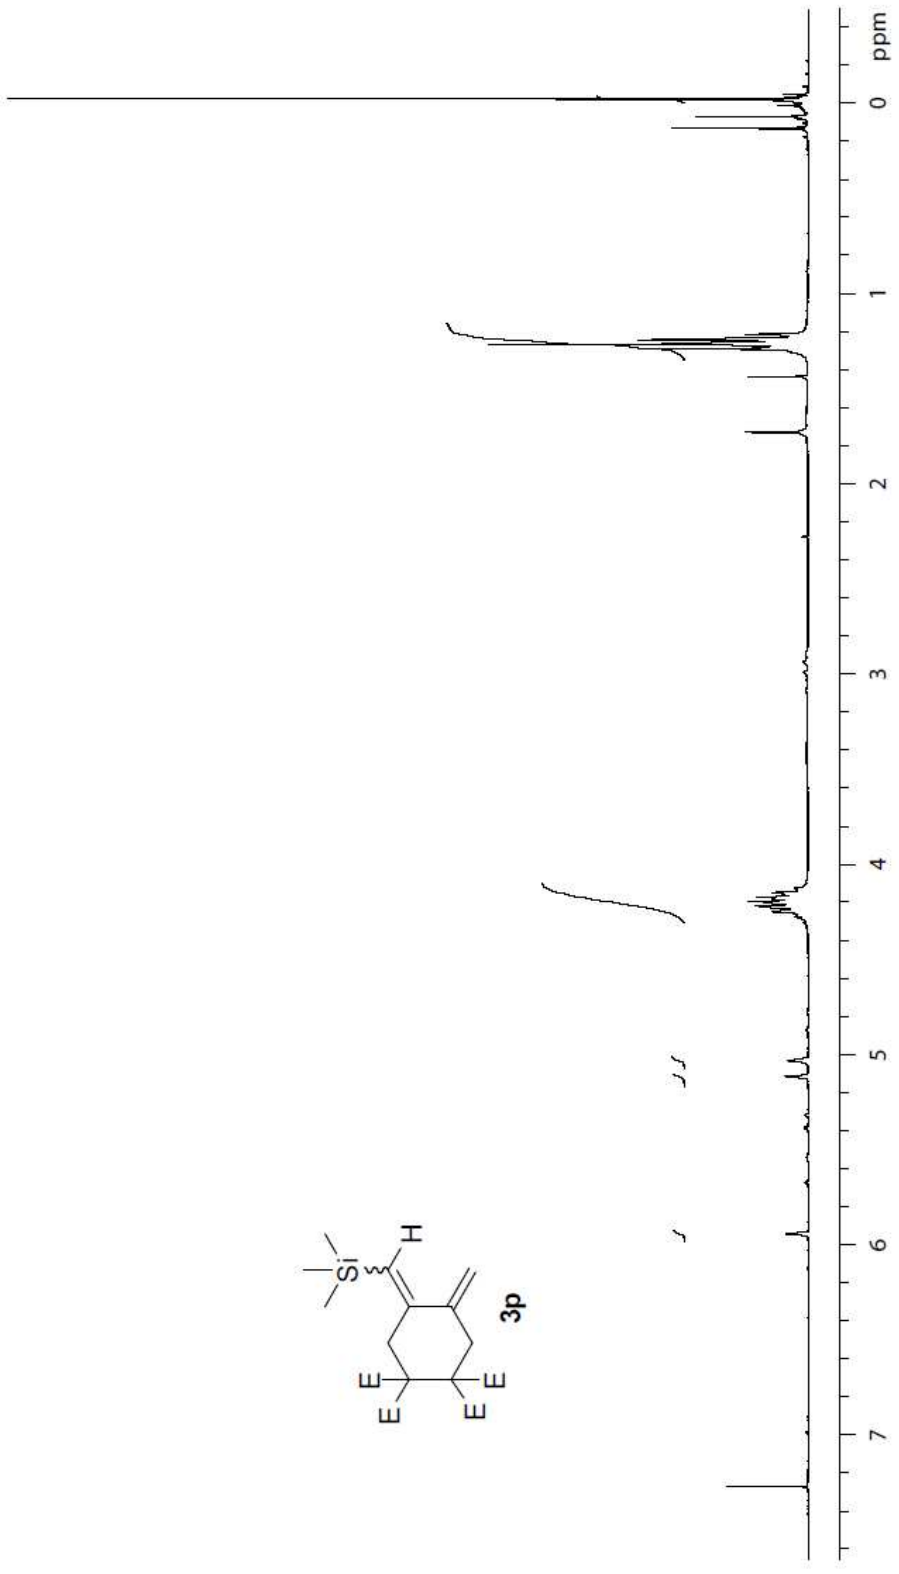

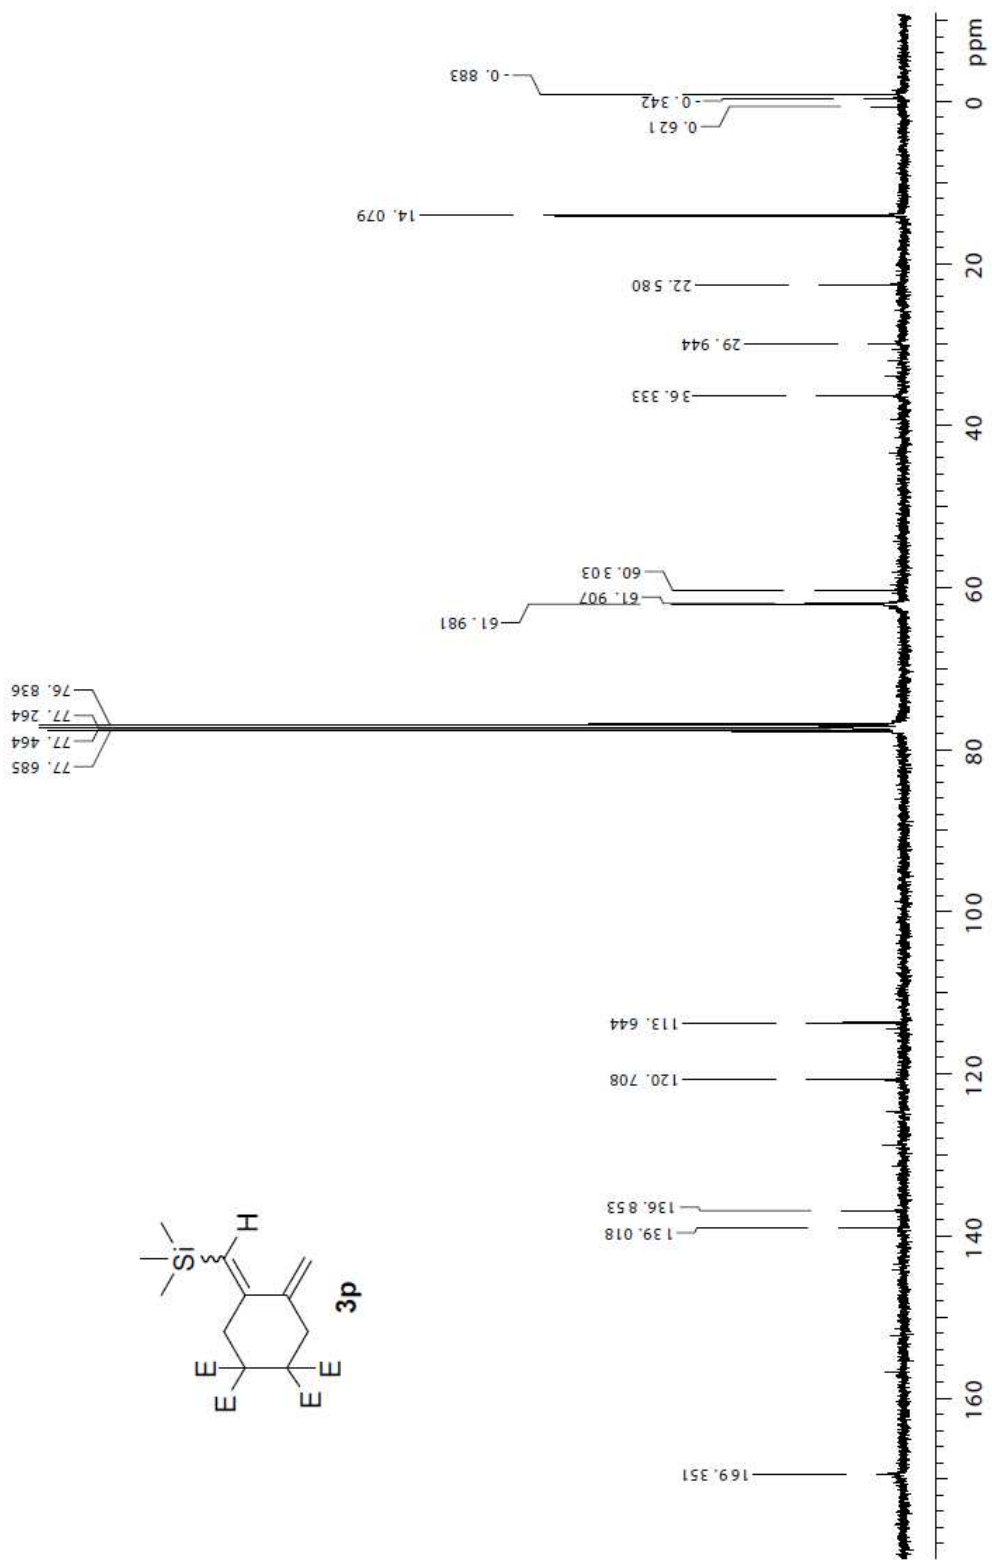

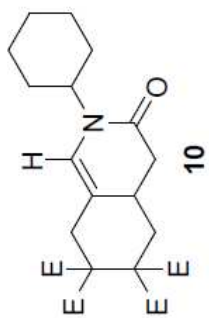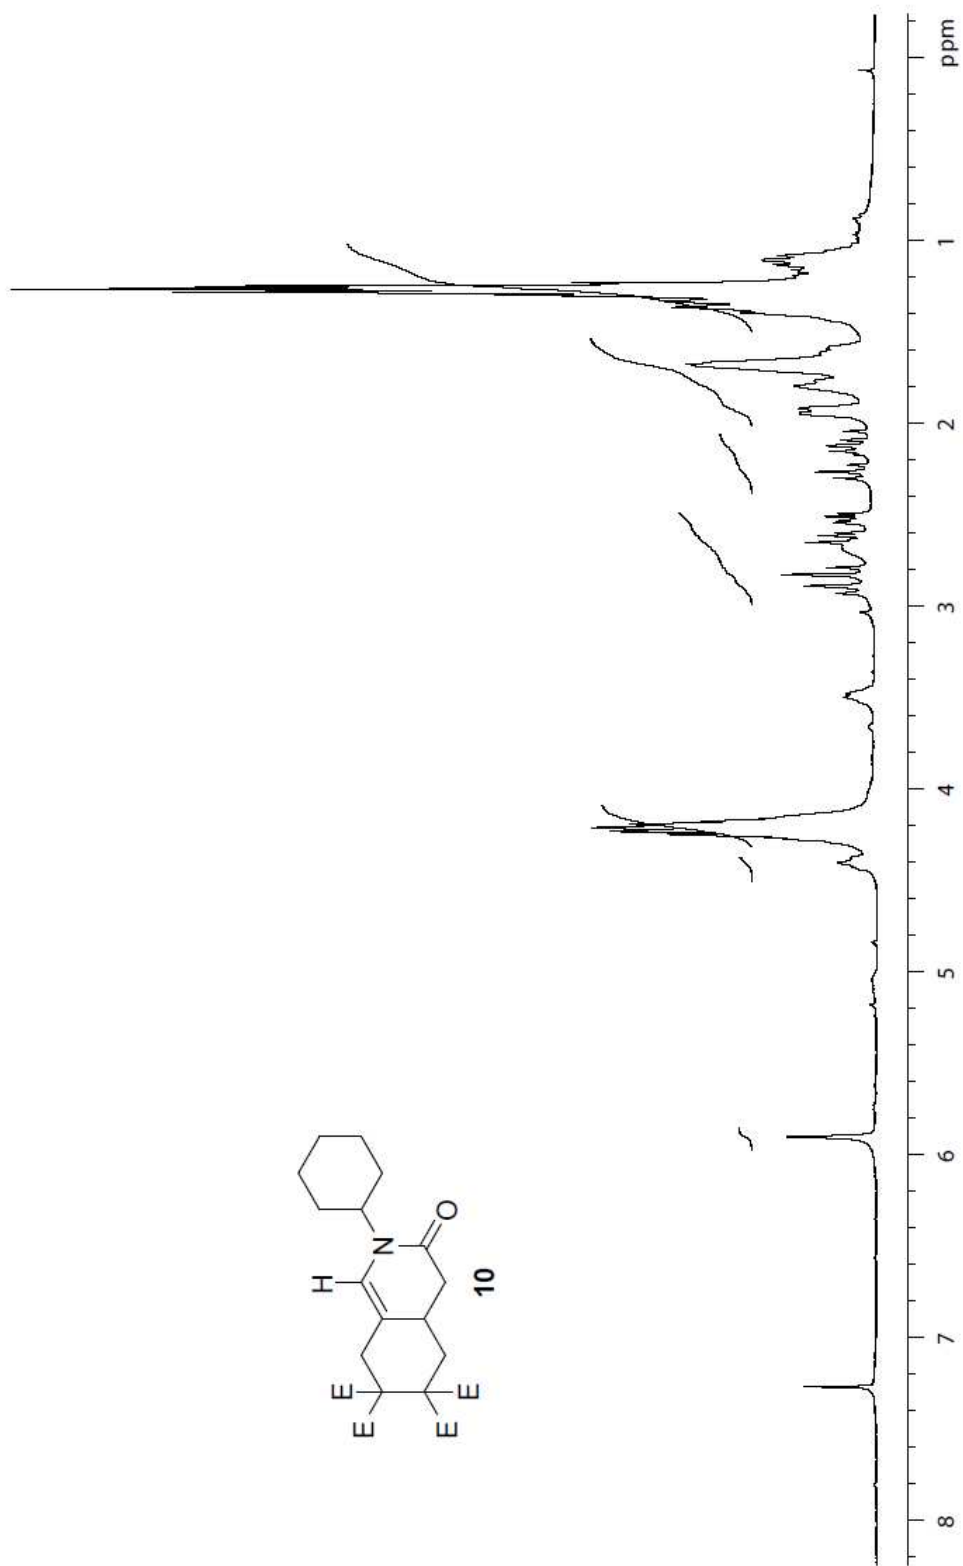



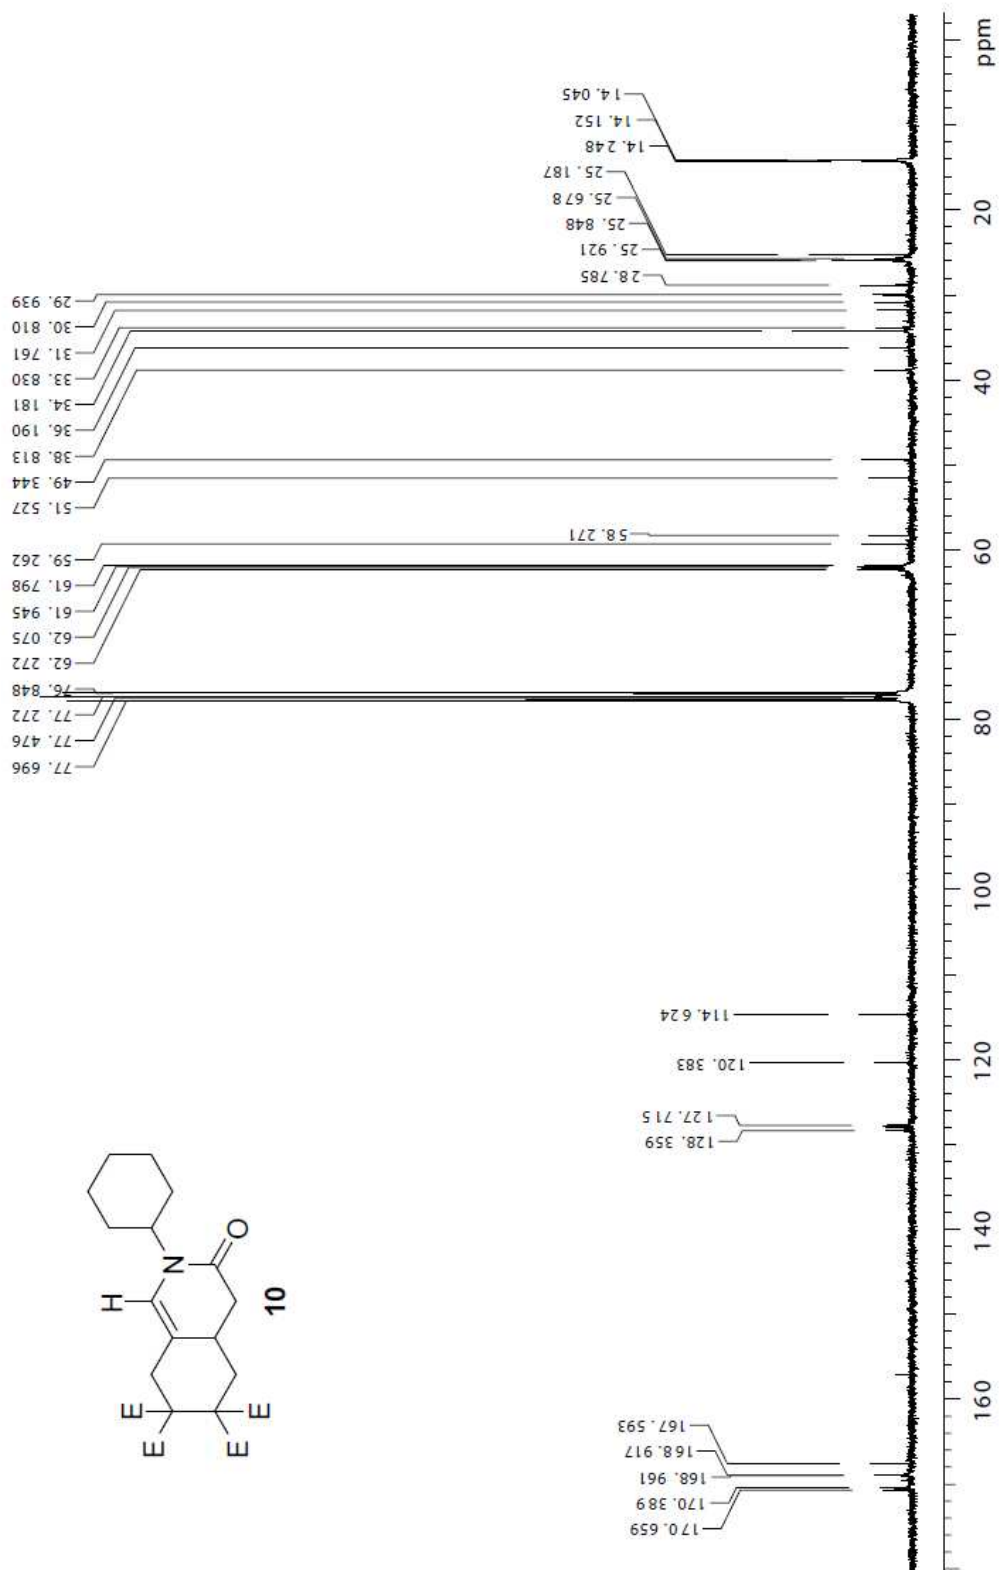

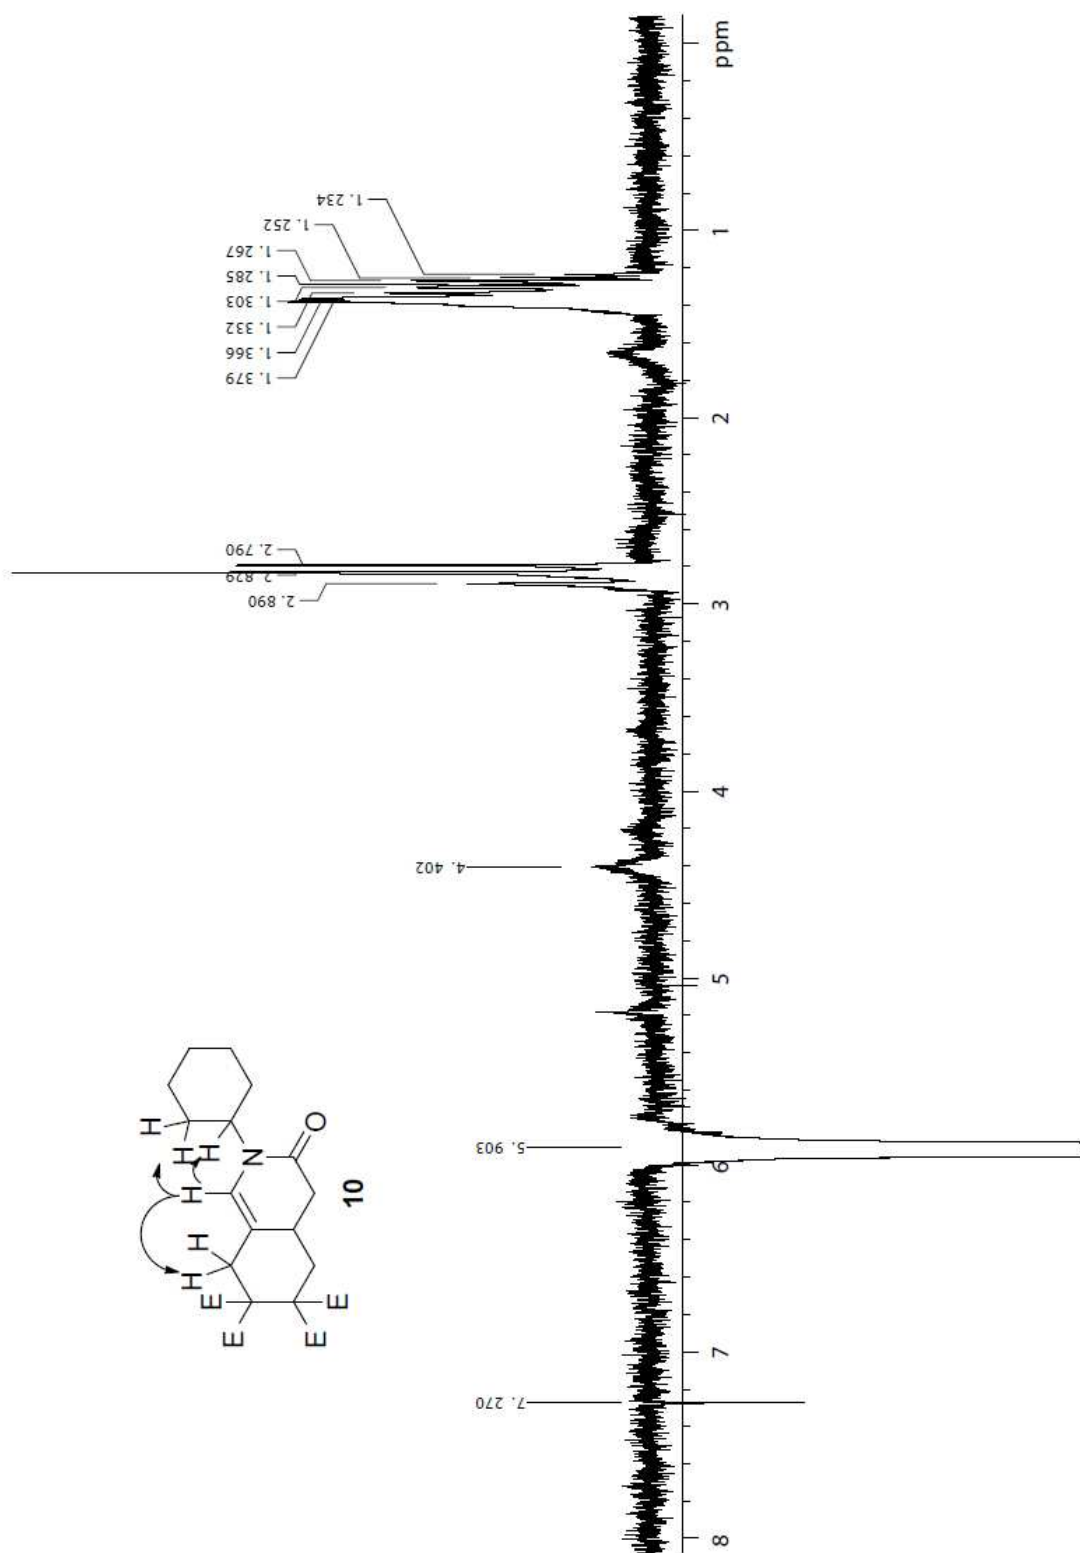

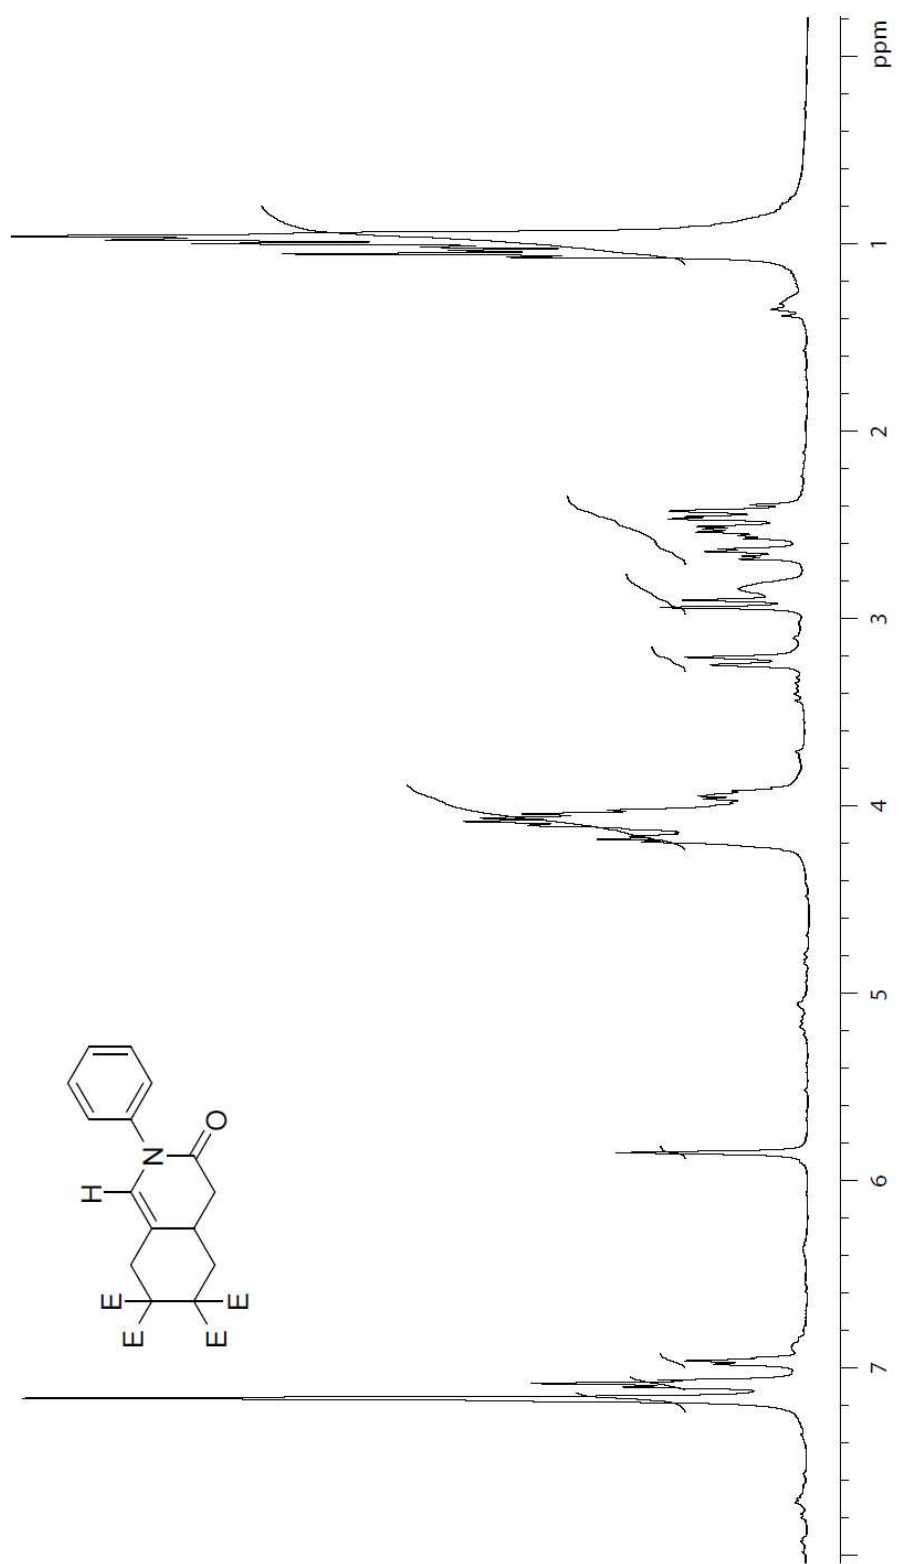

S115

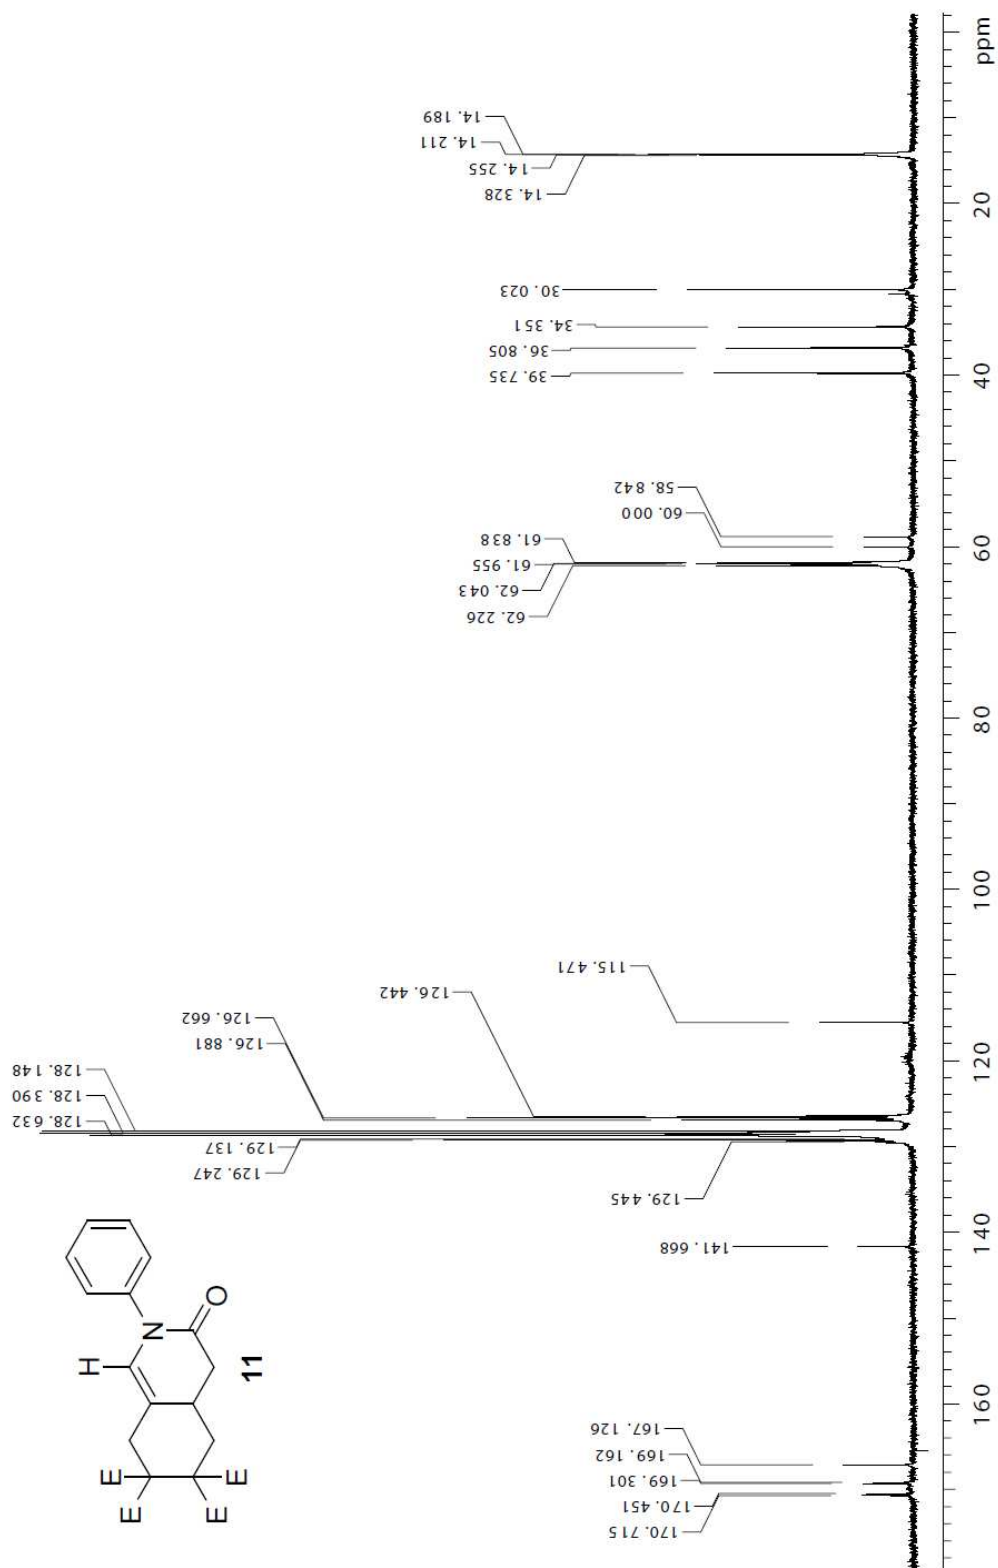

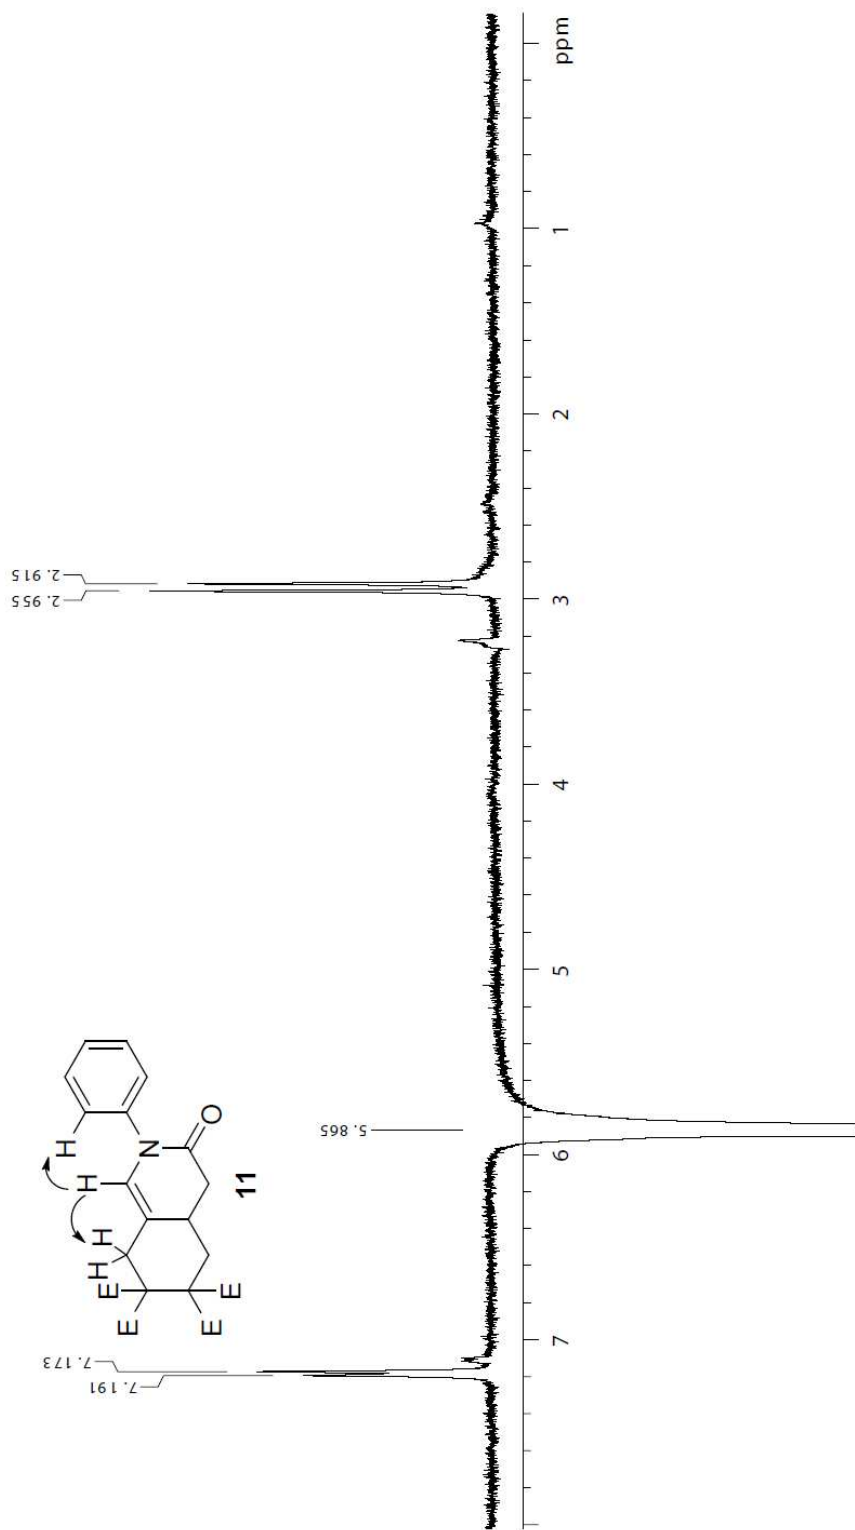

S117

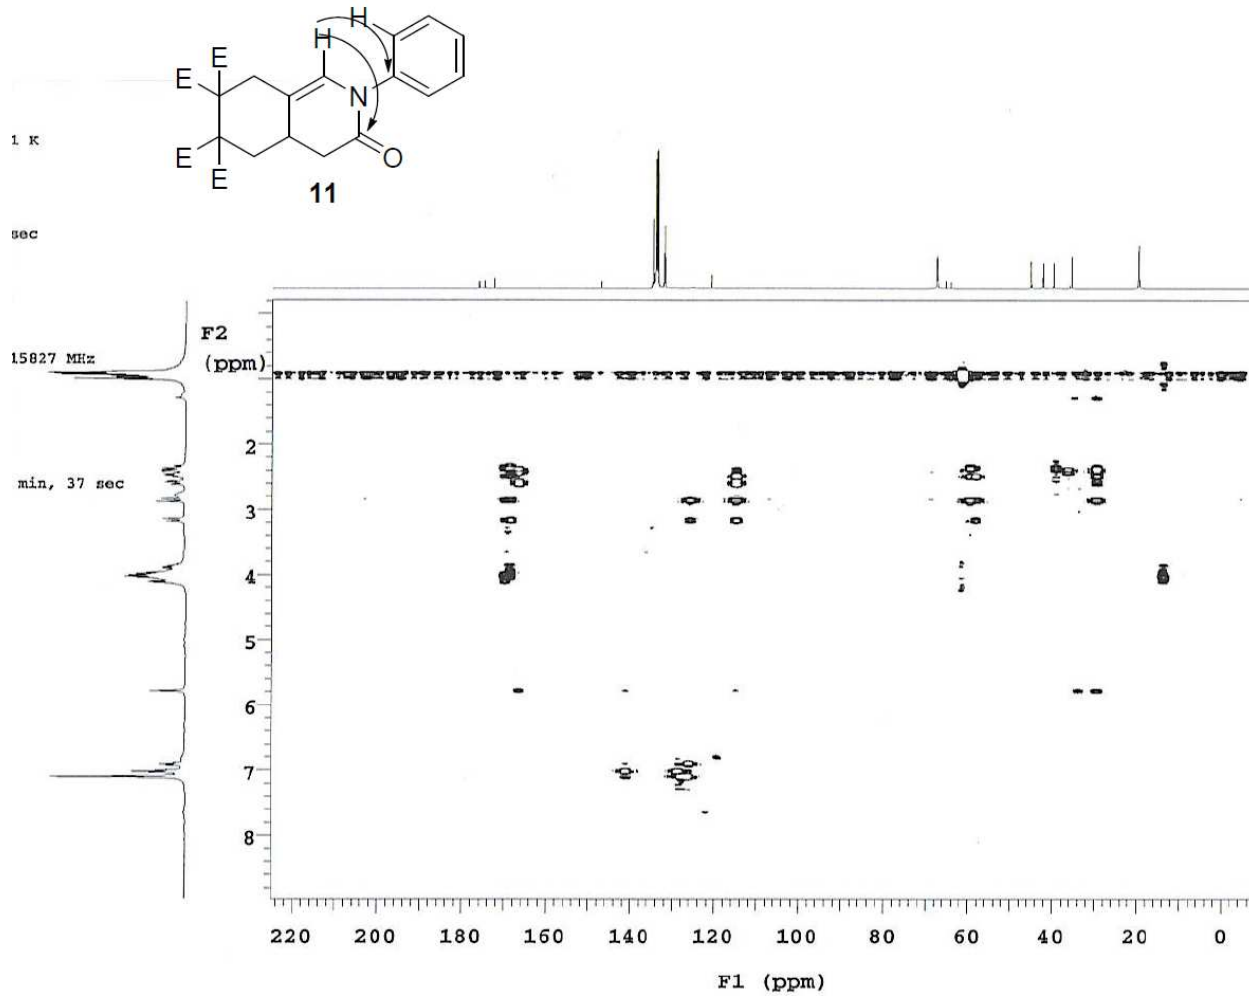

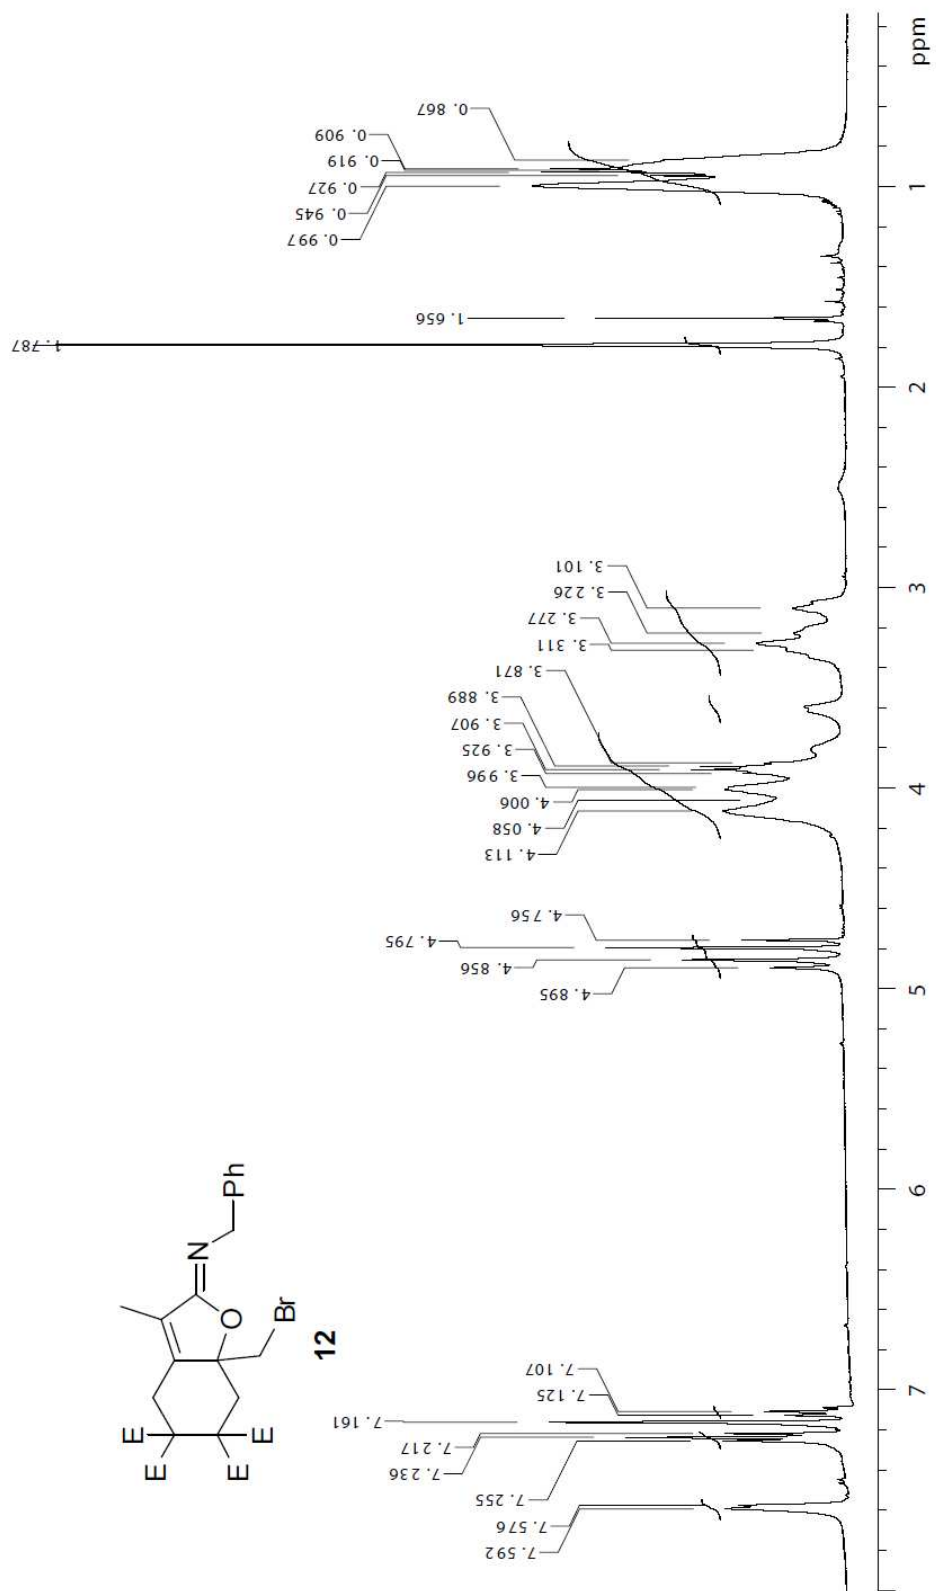

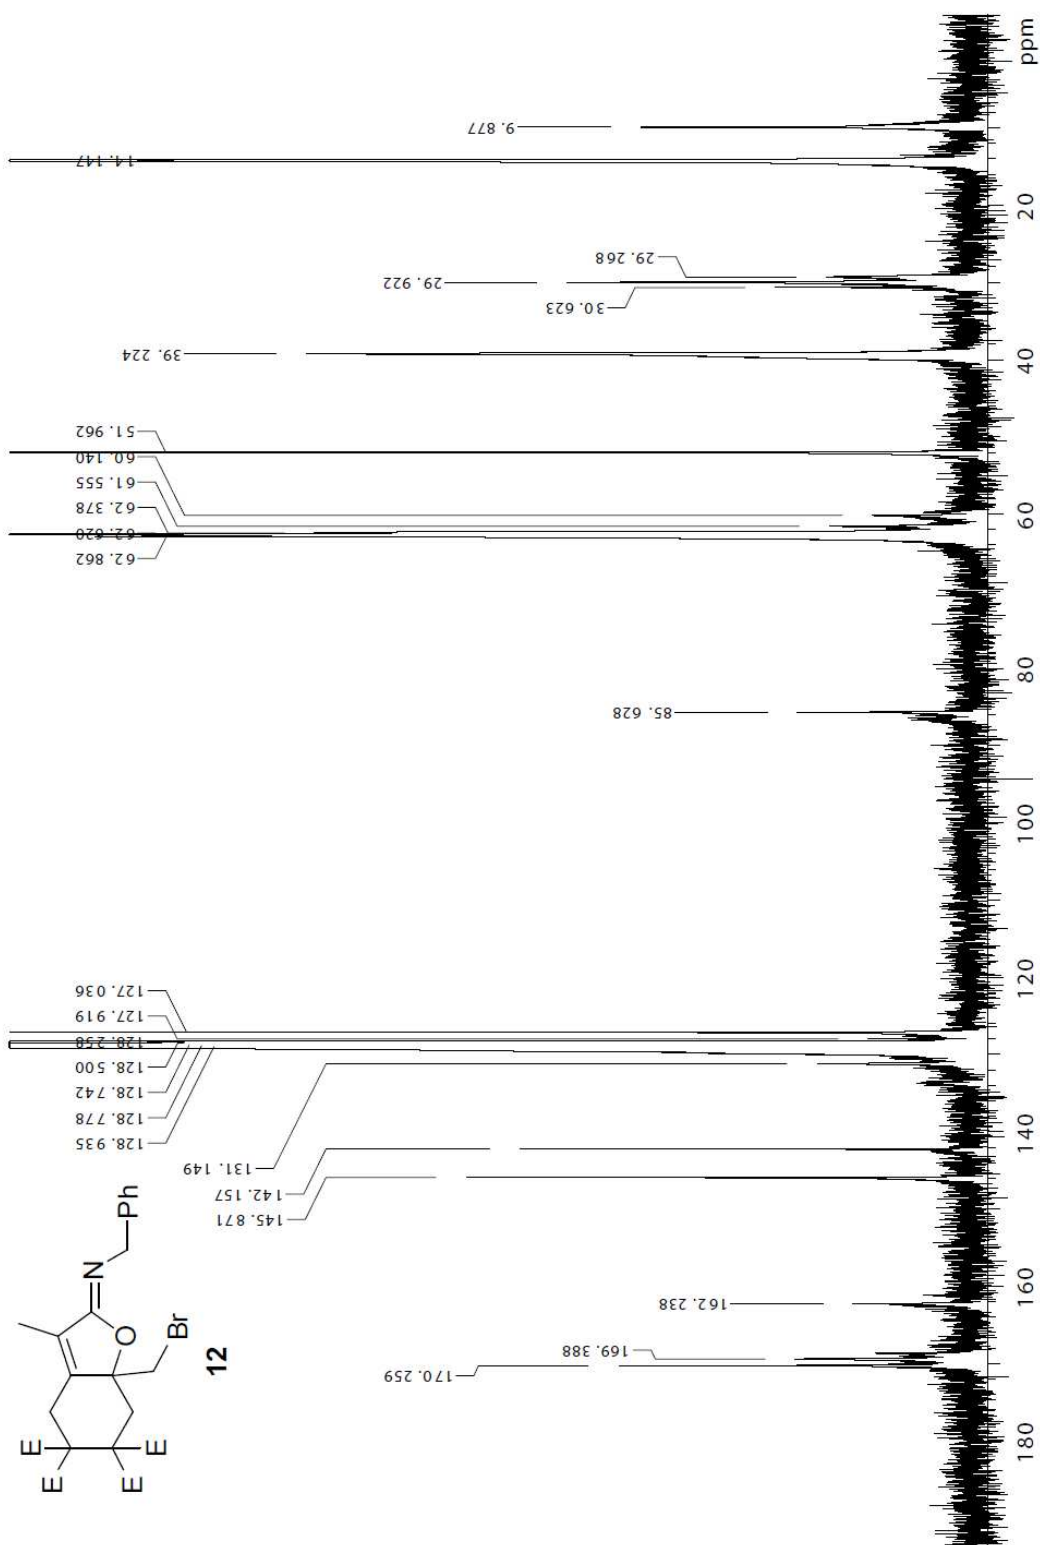



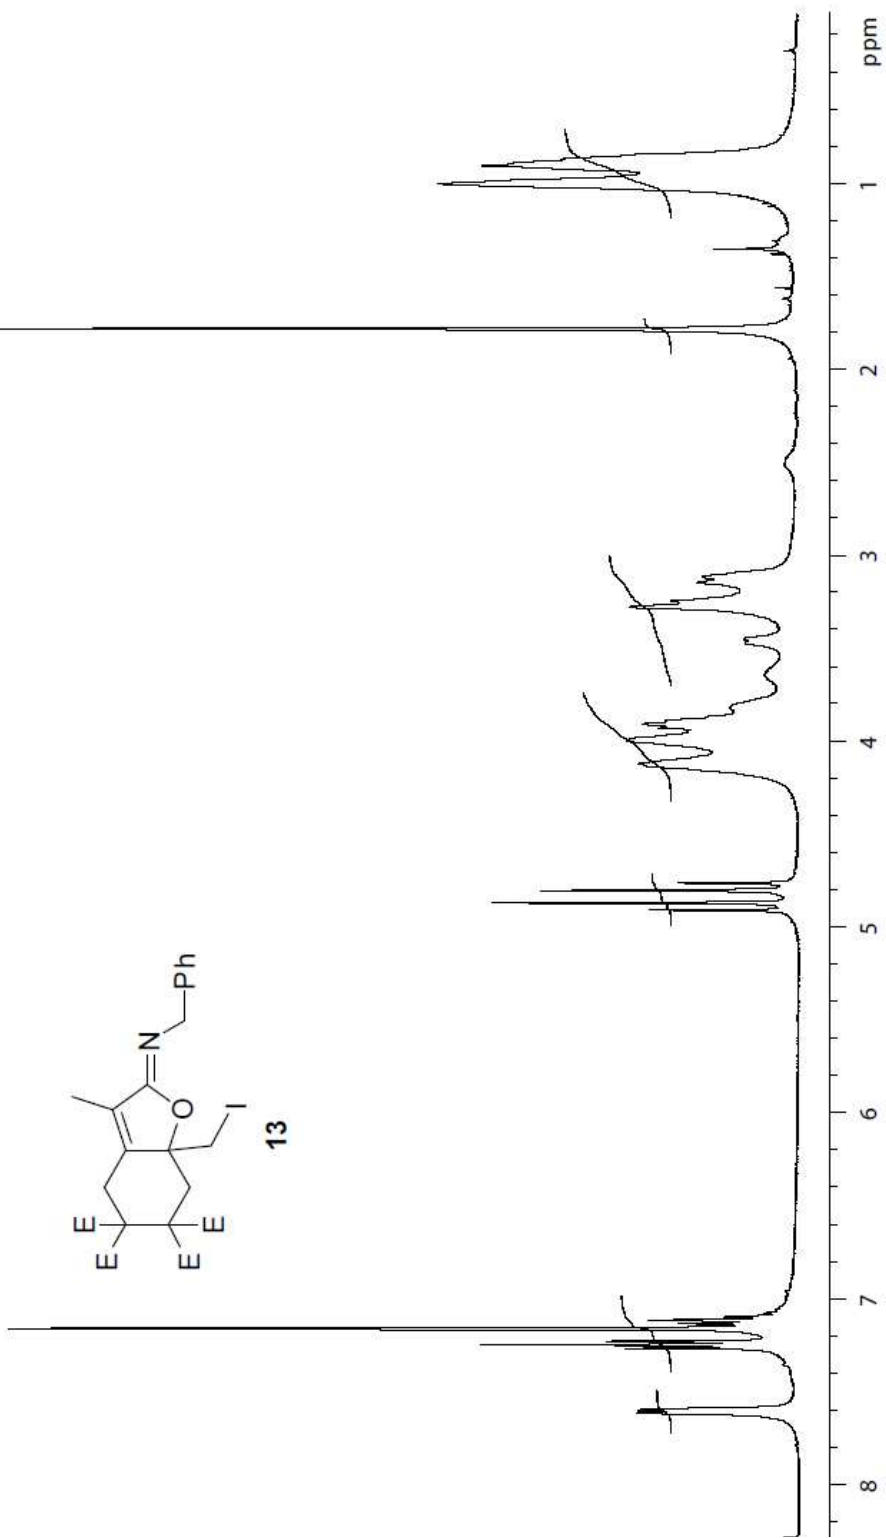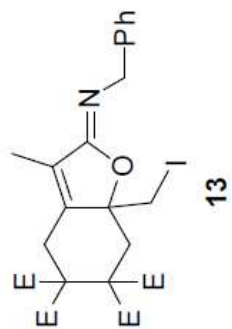

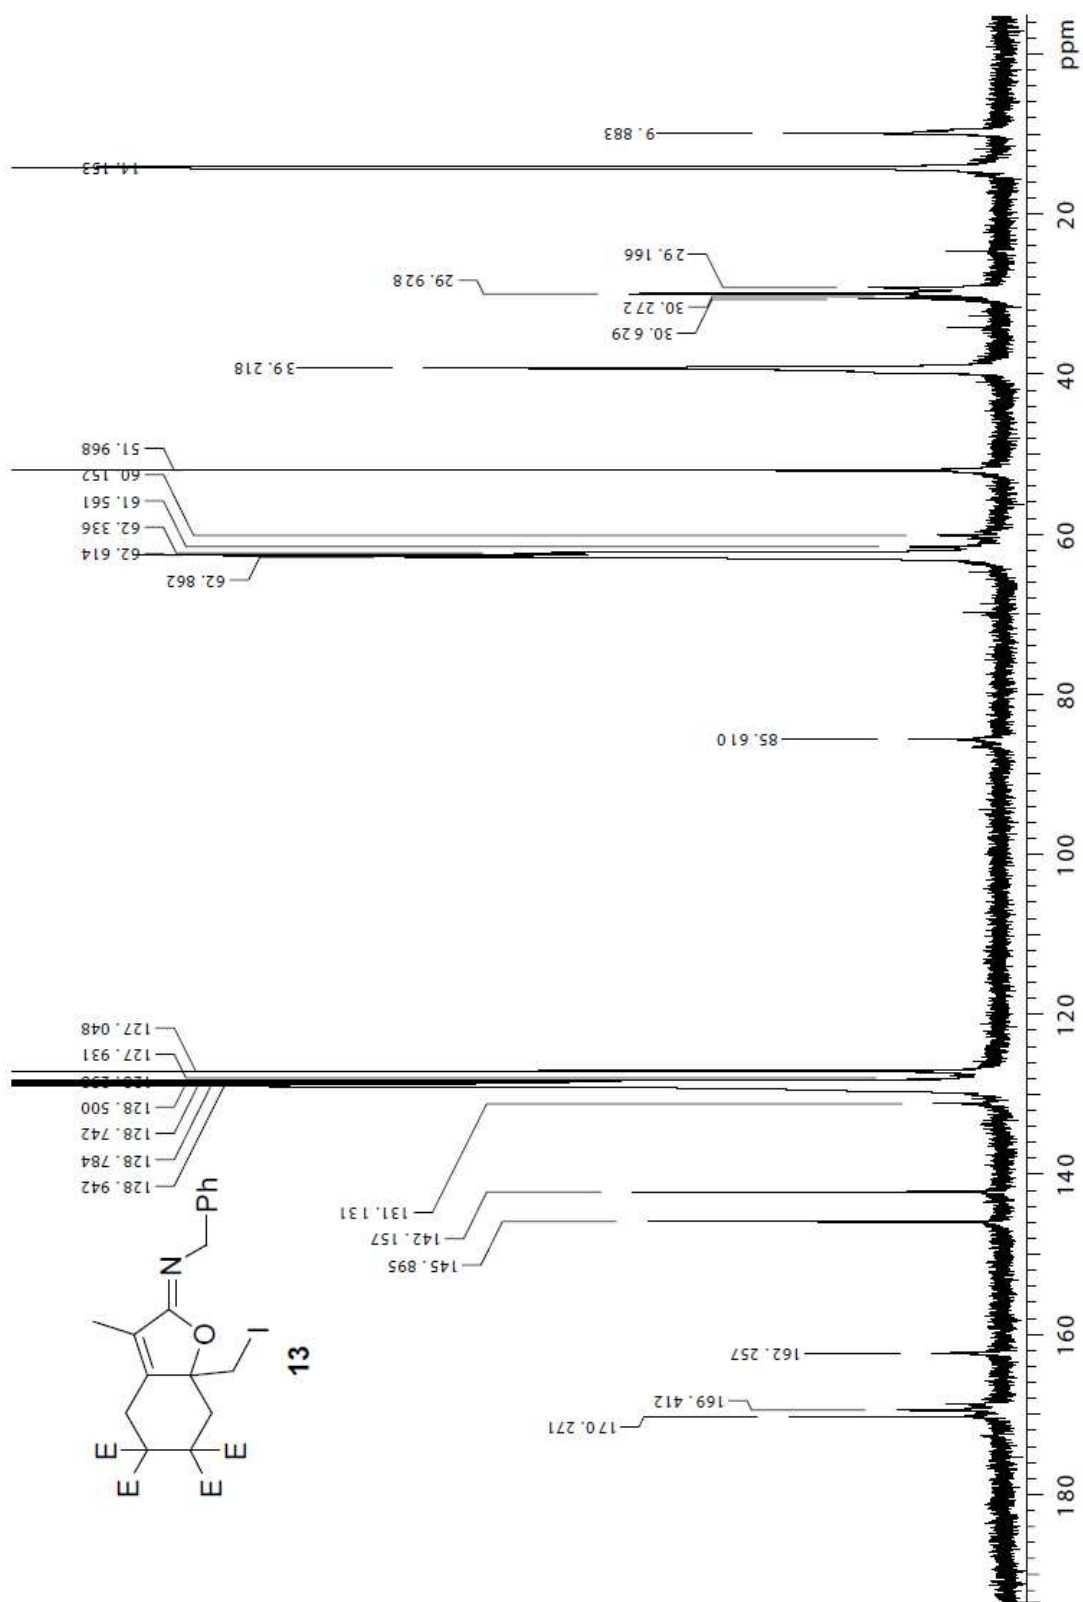

Supplement: NIHMS150616-supplement-1_si_001.pdf [file NIHMS150616-supplement-1_si_001.pdf]
